# Supplementary material for: Robust estimation of cancer and immune cell-type proportions from bulk tumor ATAC-Seq data
Source: eLife. 2024 Oct 9;13:RP94833. doi: 10.7554/eLife.94833 (PMC11464006; doi:10.7554/eLife.94833)
Supplement: Supplementary file 3. [file elife-94833-supp3.xlsx]

## Sheet: Sup_file_3
peak_id

## Sheet: Legend
column
