# Supplementary material for: Robust estimation of cancer and immune cell-type proportions from bulk tumor ATAC-Seq data
Source: eLife. 2024 Oct 9;13:RP94833. doi: 10.7554/eLife.94833 (PMC11464006; doi:10.7554/eLife.94833)
Supplement: Supplementary file 4. [file elife-94833-supp4.xlsx]

## Sheet: Sup_file_4
peak_id	chr	peak_start	peak_end	gene_id	gene_symbol	gene_locus_start	gene_locus_end	nearest_tss	dist_to_tss	nearest_tss_gene_id	nearest_tss_symbol	nearest_tss_gene_strand	cell_type	chipSeeker_annot	Signac_TF_enriched	MonaLisa_TF_enriched	Remap_CBP_enriched
chr1-30759412-30760224	chr1	30759412	30760224	7805	LAPTM5	30742731	30818280	30757820	-1997	7805	LAPTM5	-	CD8_Tcells	Distal Intergenic	FOXD1,FOXI1,FOXL1,FOXO4,FOXO6,FOXP3,FERD3L,SNAI1,ATF2,FOXA3,CREB1,FOXP1,MEF2A,CREM	JUN,TFEB,RARA,NR2C1,SNAI1,ZNF135,TFEC,ZNF708,CREB1,SNAI2,CREM	IRF4
chr1-37518759-37519392	chr1	37518759	37519392	64769	MEAF6	37507258	37534511	37514774	-4300	64769	MEAF6	-	CD8_Tcells	Distal Intergenic	ELF3,GABPA,ERF::FOXI1,ERF::FOXO1,ETV2::FOXI1,FLI1::FOXI1,FOXO1::ELF1,FOXO1::ELK3	SPDEF,CREB3L4,ZNF140,ELF3,FOXO1::ELF1,FOXO1::ELK3,KLF7,ZNF418,KLF1,KLF14
chr1-38977478-38978256	chr1	38977478	38978256	79647	AKIRIN1	38966512	39008907	38991223	-13355	79647	AKIRIN1	+	CD8_Tcells	Distal Intergenic	ELK4,FLI1,FOXI1,FOXL1,ERF,ETS1,FOXO4,FOXO6,FOXP3,FOXK1,ZBTB7A,ZNF384,FERD3L,IKZF1,SNAI1,FOXA3,ELF1,ELF3,ETV1,FOXA2,FOXK2,FOXP1,GABPA,MEF2A,ERF::FOXI1,ERF::FOXO1,ETV2::FOXI1,FLI1::FOXI1,FOXO1::ELF1,FOXO1::ELK3	FLI1,SPDEF,LBX2,ERF,SNAI1,ELF1,ELF3,SNAI2,ELK1::HOXA1,FLI1::DRGX,FOXO1::ELF1,FOXO1::ELK3,KLF7,ZNF418,KLF1,KLF14,ETV4	BRD4,IRF4
chr1-92476061-92476781	chr1	92476061	92476781	2672	GFI1	92408599	92556405	92483954	7532	2672	GFI1	-	CD8_Tcells	Exon	ETV6,ETV2,ZBTB7A,IKZF1,TBX18,ELF1,ELF3,ETV1,GABPA,ERF::FOXI1,ETV2::FOXI1,FLI1::FOXI1,FOXO1::ELF1,FOXO1::ELK3	TFEB,MAX,ZEB1,TCF7L1,CREB3L4,TBX18,ASCL1,TFEC,ELF1,ELF3,TWIST1,ELK1::HOXB13,FOXO1::ELF1,FOXO1::ELK3,KLF1,KLF14	BRD4,IRF4,STAT5B
chr1-116128506-116129062	chr1	116128506	116129062	126868	MAB21L3	116072217	116248270	116123873	4910	126868	MAB21L3	+	CD8_Tcells	Intron	ELF1,ELF3,ETV1,GABPA	POU2F1,ELF1,ELF3,SCRT1,ELF2,NR1D2	IRF4,STAT5B,JUN,BRD4
chr1-160714142-160714769	chr1	160714142	160714769	962	CD48	160679550	160725454	160711851	-2603	962	CD48	-	CD8_Tcells	Distal Intergenic		ZEB1,TCF3,ZNF418
chr1-168443846-168444394	chr1	168443846	168444394	693142	MIR557	168341771	168459760	168375524	68595	693142	MIR557	+	CD8_Tcells	Intron	ELF1,ELF3	ZNF135,ZNF708,ELF1,ELF3,ZNF418,ELF2	STAT5B,IRF4,BRD4
chr1-172117700-172118295	chr1	172117700	172118295	406996	MIR214	172054515	172141775	172138907	20909	406996	MIR214	-	CD8_Tcells	Intron	RUNX2,RUNX3	RUNX3	STAT5B
chr1-198179408-198179983	chr1	198179408	198179983	140609	NEK7	198037182	198409189	198157121	22573	140609	NEK7	+	CD8_Tcells	Intron	FOXI1,FOXL1,FOXO4,FOXO6,FOXP3,FOXK1,IKZF1,FOXA3,ETV1,FOXA2,FOXK2,FOXP1,ERF::FOXI1,ERF::FOXO1,ETV2::FOXI1,FLI1::FOXI1,FOXO1::ELF1,FOXO1::ELK3	SPDEF,FOXO1::ELF1,FOXO1::ELK3	IRF4,BRD4
chr1-198614179-198614725	chr1	198614179	198614725	5788	PTPRC	198589809	198770003	198638671	-24218	5788	PTPRC	+	CD8_Tcells	Distal Intergenic	HOXB13	NEUROG2,TCF7L1	IRF4,BRD4
chr1-235848160-235848724	chr1	235848160	235848724	100302139	MIR1537	235820955	235859968	235853060	4617	100302139	MIR1537	-	CD8_Tcells	Intron	EOMES,TBX4,TBX5,ZNF384,TBX18,ATF2,CREB1,TBX3	JUN,FOSB::JUN,NR2C1,TBX18,CREB1
chr1-237411582-237412107	chr1	237411582	237412107	100616141	MIR4428	237370809	237572941	237471119	-59274	100616141	MIR4428	+	CD8_Tcells	Intron	JDP2,ATF2,CREB1,ELF1,ELF3,ETV1,FOXA2,GABPA,HOXB13,CREM,FOXE1	JUN,LHX6,MIXL1,LBX2,MEIS1,POU2F1,TBX19,HOXB3,FOSB::JUN,FOSL1::JUN,FOSB::JUNB,NR2C1,ZNF449,CREB1,ELF1,ELF3,CREM,FOXE1
chr2-7450409-7451242	chr2	7450409	7451242	9781	RNF144A	6898094	7488125	6996940	453884	9781	RNF144A	+	CD8_Tcells	Exon	MEF2C,FOXI1,FOXL1,FOXO4,FOXO6,FOXP3,FOXK1,ZNF384,IKZF1,SNAI1,FOXA3,FOXA2,FOXK2,FOXP1,MEF2A,ERF::FOXO1,FOXE1	TFEB,MEIS1,SNAI1,SNAI2,FOXE1	BRD4,JUN,IRF4,STAT5B
chr2-7516957-7517502	chr2	7516957	7517502	339788	LINC00298	7488126	8048817	7979310	462080	339788	LINC00298	-	CD8_Tcells	Distal Intergenic	ELK4,JDP2,ZBTB7A,IKZF1,ELF3,ETV1,GABPA,ERF::FOXO1,ETV2::FOXI1	TFEB,MEIS1,TBR1,FOSL1::JUN,FOSB::JUNB,ELF3,KLF7,KLF1	BRD4,STAT5B,IRF4
chr2-86785391-86785906	chr2	86785391	86785906	925	CD8A	86781064	86835155	86790825	5176	925	CD8A	-	CD8_Tcells	3' UTR		KLF7,KLF1,KLF14	IRF4,JUN,STAT5B
chr2-86786034-86786569	chr2	86786034	86786569	925	CD8A	86781064	86835155	86790825	4523	925	CD8A	-	CD8_Tcells	Intron	FOXD1,FOXI1,FOXL1,TBX2,EOMES,TBX4,TBX5,FOXO4,FOXO6,FOXP3,FOXK1,TBX18,ATF2,FOXA3,CREB1,FOXA2,FOXK2,FOXP1,CREM,TBX21,TBX3	JUN,ESRRB,MEIS1,POU2F1,TBR1,FOSB::JUN,MAFA,TBX18,CREB1,CREM	IRF4,JUN
chr2-86793636-86794225	chr2	86793636	86794225	925	CD8A	86781064	86835155	86791680	-2249	925	CD8A	-	CD8_Tcells	Intron	ZNF384	SMAD3,ZEB1,SMAD5,ZNF449,FLI1::DRGX,KLF7,KLF1,KLF14
chr2-86809358-86809907	chr2	86809358	86809907	925	CD8A	86781064	86835155	86808396	-1235	925	CD8A	-	CD8_Tcells	Promoter	SNAI1,ETV1	ZEB1,SNAI1,TCF3,KLF7,KLF1,KLF14	BRD4,STAT5B
chr2-86825362-86827407	chr2	86825362	86827407	925	CD8A	86781064	86835155	86808396	-17987	925	CD8A	-	CD8_Tcells	Intron	MEF2C,ETV6,RUNX2,TBX4,TBX5,ZNF384,FERD3L,IKZF1,SNAI1,TBX18,ELF1,ELF3,MEF2A,ERF::FOXI1,ETV2::FOXI1,FLI1::FOXI1,FOXO1::ELF1,FOXO1::ELK3,TBX21,FOXE1,TBX3	ESRRB,TBR1,ZEB1,SNAI1,TBX18,ZNF135,ZNF140,ASCL1,TFEC,ELF1,ELF3,SNAI2,TCF3,FOXO1::ELF1,FOXO1::ELK3,ZNF669,KLF1,FOXE1	IRF4,BRD4,STAT5B,JUN
chr2-86842491-86843004	chr2	86842491	86843004	926	CD8B	86835156	86884938	86861915	19167	926	CD8B	-	CD8_Tcells	Intron	ELK4,ETV6,FLI1,ERF,ETS1,ETV2,IKZF1,ELF1,ELF3,ETV1,GABPA,FOXO1::ELK3	FLI1,ERF,TBX19,ELF1,ELF3,ELK1::HOXA1,FLI1::DRGX,FOXO1::ELK3,ELF2
chr2-98835638-98836496	chr2	98835638	98836496	343990	KIAA1211L	98776716	99007593	98822304	-13762	343990	KIAA1211L	-	CD8_Tcells	Intron	JDP2,TBX2,EOMES,TBX4,TBX5,IKZF1,SNAI1,TBX21,TBX3	TBR1,FOSL1::JUN,FOSB::JUNB,CREB3L4,SNAI1,ASCL1,TCF3,ETV2::DRGX,FLI1::DRGX	BRD4,JUN,IRF4,STAT5B
chr2-110858314-110859201	chr2	110858314	110859201	55289	ACOXL	110705344	111055071	110805319	53437	55289	ACOXL	+	CD8_Tcells	Intron	MEF2C,IKZF1,SNAI1,ATF2,CREB1,ETV1,HOXB13,CREM,ETV2::FOXI1,FLI1::FOXI1,FOXO1::ELF1,FOXO1::ELK3	JUN,ESRRB,POU2F1,ZEB1,FOSB::JUN,NR2C1,SNAI1,CREB1,NFIL3,SCRT1,SNAI2,TCF3,CREM,FOXO1::ELF1,FOXO1::ELK3,ZNF418,KLF1	JUN,STAT5B,IRF4,BRD4
chr2-126664078-126665172	chr2	126664078	126665172	2995	GYPC	125438820	126856340	126656189	8435	2995	GYPC	+	CD8_Tcells	Intron	MEF2C,TBX4,TBX5,ZNF384,TBX18,MEF2A,TBX3	SREBF1,TBX19,TCF7L1,TBX18,ZNF135,ZNF669	BRD4,IRF4
chr2-126762109-126762638	chr2	126762109	126762638	2995	GYPC	125438820	126856340	126656189	106183	2995	GYPC	+	CD8_Tcells	Distal Intergenic	ZNF384,IKZF1,SNAI1,ETV1,GABPA,ETV2::FOXI1,FOXE1	SNAI1,ZNF449,TCF3,KLF7,KLF1,KLF14,FOXE1	BRD4,IRF4
chr2-131010557-131011078	chr2	131010557	131011078	50649	ARHGEF4	130796874	131067485	131011683	-865	50649	ARHGEF4	+	CD8_Tcells	Intron		KLF7,ZNF418,KLF1,KLF14
chr2-134668741-134669271	chr2	134668741	134669271	81615	TMEM163	134356767	134778773	134719000	49993	81615	TMEM163	-	CD8_Tcells	Intron	EOMES,ZNF384,TBX3	SPDEF,TBR1,TCF7L1	IRF4,JUN,STAT5B
chr2-135657993-135658521	chr2	135657993	135658521	406915	MIR128-1	135655309	135670390	135665383	-7125	406915	MIR128-1	+	CD8_Tcells	Intron	FOXD1,ELK4,ETV6,FOXI1,FOXL1,RUNX2,TBX4,TBX5,FOXO4,FOXO6,FOXP3,FOXK1,ZNF384,SNAI1,TBX18,FOXA3,FOXA2,FOXK2,FOXP1,RUNX3,TBX3	SNAI1,TBX18,ZNF135,ZNF784,ZNF708,RUNX3,SCRT1,SNAI2,ELK1::HOXB13	JUN
chr2-135819792-135820653	chr2	135819792	135820653	3938	LCT	135792704	135844562	135812959	-7262	3938	LCT	-	CD8_Tcells	Promoter	FERD3L,IKZF1	TFEB,ESRRB,ZNF140,ZSCAN29,ASCL1,ZNF708,KLF7,KLF1,KLF14	JUN,BRD4,STAT5B
chr2-144323873-144325605	chr2	144323873	144325605	79712	GTDC1	144235740	144368970	144319870	-4868	79712	GTDC1	-	CD8_Tcells	Intron	MEF2C,TBX2,EOMES,TBX4,TBX5,ZNF384,IKZF1,TBX18,ATF2,ELF1,ELF3,ETV1,GABPA,HOXB13,MEF2A,RUNX3,ERF::FOXI1,TBX21,TBX3	ESRRB,RARA,MEIS1,TBR1,TBX19,FOSL1::JUN,FOSB::JUNB,NR2C1,TBX18,ZNF140,ELF1,ELF3,NFIL3,RUNX3	IRF4,BRD4,JUN,STAT5B
chr2-153235442-153235999	chr2	153235442	153235999	56475	RPRM	153099488	153675360	153478808	243087	56475	RPRM	-	CD8_Tcells	Distal Intergenic	ELF3	ELF3	IRF4,STAT5B
chr2-160506978-160507537	chr2	160506978	160507537	5937	RBMS1	160407886	160815351	160493794	-13462	5937	RBMS1	-	CD8_Tcells	Distal Intergenic	RUNX2,ZNF384,HOXB13,RUNX3,FOXE1	ESRRB,MEIS1,ZNF135,ZNF652,RUNX3,FOXE1	IRF4,STAT5B
chr2-169106775-169108151	chr2	169106775	169108151	10170	DHRS9	169048056	169110385	169081107	26355	10170	DHRS9	+	CD8_Tcells	Distal Intergenic	FLI1,ERF,ETS1,ETV2,RUNX2,ZNF384,FERD3L,IKZF1,ATF2,ETV1,ERF::FOXI1,ERF::FOXO1,FLI1::FOXI1,FOXO1::ELF1,FOXO1::ELK3	JUN,FLI1,MIXL1,NEUROG2,NKX2-3,NKX6-2,ERF,ZNF652,FOXO1::ELF1,FOXO1::ELK3	STAT5B,IRF4,BRD4,JUN
chr2-181143729-181144256	chr2	181143729	181144256	101927156	LINC01934	181079812	181214797	181123942	20049	101927156	LINC01934	+	CD8_Tcells	Intron	ELK4,FLI1,FOXI1,FOXL1,ERF,ETS1,ETV2,FOXO4,FOXO6,FOXP3,FOXK1,ZNF384,IKZF1,FOXA3,ELF1,ELF3,ETV1,FOXA2,FOXK2,FOXP1,GABPA,FOXE1	FLI1,RARA,ERF,ZKSCAN1,ELF1,ELF3,FOXE1	IRF4
chr2-181306692-181307230	chr2	181306692	181307230	100616213	MIR4437	181214798	181381427	181305652	-1308	100616213	MIR4437	-	CD8_Tcells	Intron	FOXI1,FOXL1,FOXO4,FOXO6,FOXP3,IKZF1,FOXA3,ETV1,FOXA2,FOXK2,FOXP1,GABPA,RUNX3,ETV2::FOXI1,FLI1::FOXI1,FOXE1	DBP,SMAD3,FOSL1::JUN,TCF7L1,RUNX3,ZNF418,FOXE1	BRD4,STAT5B
chr2-191061530-191062104	chr2	191061530	191062104	6775	STAT4	191027284	191198390	191041683	-20133	6775	STAT4	-	CD8_Tcells	Exon	ETV2,RUNX2,ZNF384,RUNX3,ERF::FOXI1,ETV2::FOXI1,FLI1::FOXI1	LBX2,RAX2,ESRRB,NKX2-5,RUNX3,ZNF418	BRD4,IRF4
chr2-201252414-201252967	chr2	201252414	201252967	841	CASP8	201233466	201281180	201257980	-5289	841	CASP8	+	CD8_Tcells	Intron	MEF2C,JDP2,RUNX2,FERD3L,SNAI1,GABPA,MEF2A,FOXE1	FOSL1::JUN,FOSB::JUNB,NR2C1,SNAI1,ZNF135,TWIST1,FOXE1,NR1D2	IRF4,BRD4,STAT5B,JUN
chr2-219200343-219201127	chr2	219200343	219201127	130617	ZFAND2B	219186758	219209748	219195237	5497	130617	ZFAND2B	+	CD8_Tcells	5' UTR	ELF3,GABPA,ERF::FOXI1,ERF::FOXO1,ETV2::FOXI1,FLI1::FOXI1,FOXO1::ELF1,FOXO1::ELK3	SPDEF,TCF7L1,CREB3L4,ELF3,FOXO1::ELF1,FOXO1::ELK3,KLF7,ZNF418,KLF1,KLF14
chr2-230575594-230576107	chr2	230575594	230576107	6672	SP100	230408537	230619085	230537642	38207	6672	SP100	+	CD8_Tcells	Exon	JDP2	MAX,FOSL1::JUN,FOSB::JUNB,CREB3L4,TWIST1,KLF7,KLF1,KLF14	JUN,IRF4,STAT5B
chr3-10437169-10437752	chr3	10437169	10437752	491	ATP2B2	10402608	10580470	10449613	12152	491	ATP2B2	-	CD8_Tcells	Intron	FOXI1,FOXL1,FOXO4,FOXO6,FOXP3,ATF2,FOXA3,CREB1,ELF3,FOXA2,FOXK2,FOXP1,CREM,FOXE1	JUN,SREBF1,NKX2-3,FOSB::JUN,CREB1,ELF3,TWIST1,CREM,FOXE1	BRD4,IRF4,JUN,STAT5B
chr3-16377104-16377742	chr3	16377104	16377742	23180	RFTN1	16296167	16525173	16370966	-6456	23180	RFTN1	-	CD8_Tcells	Exon	ELK4,ETV6,FLI1,FOXI1,FOXL1,ERF,ETS1,ETV2,FOXO4,FOXO6,FOXP3,FOXK1,ZBTB7A,IKZF1,TBX18,FOXA3,ELF1,ELF3,ETV1,FOXA2,FOXK2,FOXP1,GABPA,ERF::FOXI1,ETV2::FOXI1,FLI1::FOXI1,FOXO1::ELF1,TBX3	FLI1,NKX2-3,ESRRB,ERF,TBX18,ELF1,ELF3,SCRT1,FOXO1::ELF1,ETV4,ELF2	BRD4,STAT5B
chr3-28210843-28211841	chr3	28210843	28211841	152100	CMC1	28037861	28321677	28241584	-30241	152100	CMC1	+	CD8_Tcells	Distal Intergenic	MEF2C,ELK4,FLI1,JDP2,ERF,ETS1,ETV2,TBX4,TBX5,ZNF384,IKZF1,SNAI1,TBX18,ELF1,ELF3,ETV1,GABPA,HOXB13,MEF2A,RUNX3,ERF::FOXI1,ERF::FOXO1,ETV2::FOXI1,FLI1::FOXI1,FOXO1::ELF1,FOXO1::ELK3,FOXE1	FLI1,MIXL1,NKX6-2,ERF,POU2F1,FOSL1::JUN,TCF7L1,MAFA,SNAI1,TBX18,ZNF135,ELF1,ELF3,RUNX3,SNAI2,ELK1::HOXB13,ETV2::DRGX,FOXO1::ELF1,FOXO1::ELK3,CEBPE,ELF2,FOXE1	BRD4,STAT5B
chr3-38519558-38520092	chr3	38519558	38520092	9941	EXOG	38496343	38527855	38501162	18662	9941	EXOG	+	CD8_Tcells	Intron	MEF2C,ETV2,IKZF1,ELF1,ETV1,GABPA,HOXB13,MEF2A,ERF::FOXI1,ERF::FOXO1,ETV2::FOXI1,FLI1::FOXI1,FOXO1::ELF1,FOXO1::ELK3,FOXE1	MEIS1,ELF1,FOXO1::ELF1,FOXO1::ELK3,KLF7,KLF1,ELF2,FOXE1	BRD4
chr3-45976289-45977286	chr3	45976289	45977286	79443	FYCO1	45951811	46011655	45958661	-18125	79443	FYCO1	-	CD8_Tcells	Intron	FOXD1,FOXI1,FOXL1,TBX2,EOMES,TBX4,TBX5,FOXO4,FOXO6,FOXP3,IKZF1,SNAI1,TBX18,ELF1,ERF::FOXI1,ERF::FOXO1,ETV2::FOXI1,FLI1::FOXI1,FOXO1::ELF1,FOXO1::ELK3,TBX21,FOXE1,TBX3	SPDEF,POU2F1,TBR1,SNAI1,TBX18,ASCL1,ZNF708,ELF1,SNAI2,TCF3,ETV2::DRGX,FOXO1::ELF1,FOXO1::ELK3,KLF7,KLF1,KLF14,ELF2,FOXE1,NR1D2	BRD4,STAT5B
chr3-59772678-59773219	chr3	59772678	59773219	2272	FHIT	59532118	60349355	60014150	241201	2272	FHIT	-	CD8_Tcells	Intron	ZNF384,ELF1	ELF1,NKX2-5	IRF4,STAT5B,BRD4
chr3-68088097-68088627	chr3	68088097	68088627	407738	FAM19A1	67829416	68674922	68006230	82131	407738	FAM19A1	+	CD8_Tcells	Intron	RUNX2,IKZF1,ATF2,CREB1,RUNX3,CREM	JUN,POU6F1,LHX6,RARA,POU2F1,NR2C1,CREB1,NFIL3,RUNX3,CREM	STAT5B,BRD4,IRF4
chr3-98564534-98565587	chr3	98564534	98565587	56650	CLDND1	98558699	98585680	98585498	20437	56650	CLDND1	-	CD8_Tcells	Intron	MEF2C,ETV6,JDP2,EOMES,TBX4,TBX5,ZNF384,TBX18,ELF1,ELF3,ETV1,GABPA,HOXB13,TBX21,FOXE1	NKX2-3,TBR1,TCF7L1,TBX18,ZNF652,ELF1,ELF3,NFIL3,SCRT1,SNAI2,FOXE1	IRF4,JUN,BRD4
chr3-106338460-106338977	chr3	106338460	106338977	868	CBLB	105709632	106499517	105869043	-469674	868	CBLB	-	CD8_Tcells	Distal Intergenic	FOXD1,FOXI1,FOXL1,FOXO4,FOXO6,FOXP3,FOXK1,FOXA3,FOXK2,FOXP1,HOXB13,FOXE1	CREB3L4,FOXE1	STAT5B,IRF4
chr3-108780142-108780716	chr3	108780142	108780716	84666	RETNLB	108679934	108790041	108757384	-23044	84666	RETNLB	-	CD8_Tcells	Distal Intergenic	FERD3L,IKZF1,SNAI1,ELF1,ELF3,ETV1,GABPA	ZEB1,SNAI1,ZNF140,ZNF449,ELF1,ELF3,TCF3,KLF7,KLF1,KLF14	BRD4,STAT5B
chr3-108806244-108806854	chr3	108806244	108806854	50852	TRAT1	108790042	108822771	108822698	-16148	50852	TRAT1	+	CD8_Tcells	Distal Intergenic	MEF2C,ETV2,ELF1,ELF3,ETV1,GABPA,MEF2A,ETV2::FOXI1,FLI1::FOXI1,FOXO1::ELF1	SPDEF,ZNF449,ELF1,ELF3,ELK1::HOXA1,FOXO1::ELF1	BRD4,STAT5B,IRF4
chr3-109563061-109563635	chr3	109563061	109563635	100616129	MIR4445	109506496	110336109	109602828	-39479	100616129	MIR4445	+	CD8_Tcells	Intron	MEF2C,ETV6,TBX2,EOMES,TBX4,TBX5,TBX18,ELF1,ELF3,ETV1,GABPA,FOXO1::ELK3,TBX21,TBX3	TBR1,TCF7L1,TBX18,ELF1,ELF3,FOXO1::ELK3,KLF1,KLF14	BRD4
chr3-111238758-111239374	chr3	111238758	111239374	25945	NECTIN3	111071649	111367180	111192351	46714	25945	NECTIN3	+	CD8_Tcells	Intron	ZNF384,SNAI1,HOXB13,MEF2A,RUNX3,ERF::FOXI1,ERF::FOXO1	SNAI1,RUNX3,SNAI2	STAT5B,BRD4,IRF4
chr3-111571992-111572510	chr3	111571992	111572510	10225	CD96	111367181	111581512	111567581	4669	10225	CD96	+	CD8_Tcells	Intron	JDP2	ARNT::HIF1A
chr3-112464139-112464668	chr3	112464139	112464668	151888	BTLA	112401601	112518164	112470022	5618	151888	BTLA	-	CD8_Tcells	3' UTR	MEF2C,FLI1,ERF,ETS1,ETV2,IKZF1,CREB1,ELF1,ETV1,GABPA,MEF2A,RUNX3,ERF::FOXI1,ERF::FOXO1,ETV2::FOXI1,FLI1::FOXI1,FOXO1::ELF1,FOXO1::ELK3	FLI1,ERF,CREB1,ELF1,NFIL3,RUNX3,ETV2::DRGX,FOXO1::ELF1,FOXO1::ELK3,ELF2	STAT5B,BRD4
chr3-115165169-115165715	chr3	115165169	115165715	26137	ZBTB20	114886729	115385297	115147271	-18170	26137	ZBTB20	-	CD8_Tcells	Intron	FOXD1,FOXI1,FOXL1,RUNX2,FOXO4,FOXO6,FOXP3,FOXK1,FOXA3,FOXK2,FOXP1,RUNX3	DBP,ZNF652,RUNX3	IRF4,BRD4
chr3-122271458-122272007	chr3	122271458	122272007	846	CASR	122137643	122289787	122254331	17400	846	CASR	+	CD8_Tcells	Intron	FOXI1,FOXL1,FOXO4,FOXO6,FOXP3,FOXE1	POU6F1,LHX6,NKX6-2,LBX2,RAX2,HOXB3,NFIL3,FOXE1	IRF4,STAT5B
chr3-142508620-142509261	chr3	142508620	142509261	545	ATR	142450615	142587606	142500102	-8837	545	ATR	-	CD8_Tcells	Intron	MEF2C,RUNX2,ZNF384,FOXA3,FOXA2,FOXP1,HOXB13,MEF2A,RUNX3,ERF::FOXO1,FOXO1::ELF1,FOXE1	SREBF1,FOSL1::JUN,ZNF135,ZNF449,RUNX3,FOXO1::ELF1,ZNF418,KLF1,FOXE1	BRD4,STAT5B,IRF4
chr3-151268748-151269284	chr3	151268748	151269284	9934	P2RY14	151245456	151297443	151278369	9352	9934	P2RY14	-	CD8_Tcells	Intron	MEF2C,ELK4,ETV2,ZBTB7A,ZNF384,IKZF1,ELF1,ELF3,ETV1,GABPA,MEF2A,FOXE1	POU2F1,ZEB1,ZNF135,ELF1,ELF3,ETV2::DRGX,FLI1::DRGX,FOXE1	BRD4,IRF4,STAT5B,JUN
chr3-155862458-155863014	chr3	155862458	155863014	8833	GMPS	155862483	155966557	155870536	-7799	8833	GMPS	+	CD8_Tcells	Exon	ELK4,ETV6,ZBTB7A,ZNF384,FERD3L,SNAI1,ELF1,ELF3,ETV1,GABPA	SREBF1,ZEB1,SNAI1,ZNF135,ZNF140,ELF1,ELF3,SNAI2,ELF2
chr4-36208770-36209315	chr4	36208770	36209315	116984	ARAP2	34212437	36263065	36210745	1702	116984	ARAP2	-	CD8_Tcells	Intron	RUNX2	ZEB1,ZNF135,KLF7,KLF1,KLF14	IRF4
chr4-38509379-38510490	chr4	38509379	38510490	101928776	LINC01258	38327971	38593688	38523180	13245	101928776	LINC01258	-	CD8_Tcells	Promoter	RUNX2,FERD3L,IKZF1,ETV1,RUNX3,FOXO1::ELF1	NEUROG2,ESRRB,ZNF449,RUNX3,SNAI2,TCF3,TWIST1,FOXO1::ELF1,ELF2	STAT5B,BRD4,IRF4
chr4-38655101-38655638	chr4	38655101	38655638	51274	KLF3	38593689	38720270	38664196	-8826	51274	KLF3	+	CD8_Tcells	Intron	ZNF384,HOXB13	MAX,HES6,ZNF135,ZNF140	BRD4
chr4-80500475-80501009	chr4	80500475	80501009	255119	C4orf22	80301993	80987886	80335781	164960	255119	C4orf22	+	CD8_Tcells	Intron	ELK4,ETV6,FLI1,TBX2,ERF,ETS1,EOMES,FOXK1,ZBTB7A,IKZF1,ELF1,ELF3,ETV1,FOXA2,GABPA,HOXB13,ERF::FOXI1,ETV2::FOXI1,FLI1::FOXI1,FOXO1::ELF1,FOXO1::ELK3,TBX21,TBX3	FLI1,ERF,MEIS1,TBR1,MAFA,ZKSCAN1,ZNF652,ELF1,ELF3,ELK1::HOXA1,ETV2::DRGX,FLI1::DRGX,FOXO1::ELF1,FOXO1::ELK3,ETV4,ELF2	BRD4,STAT5B
chr4-99965613-99966180	chr4	99965613	99966180	3015	H2AFZ	99948491	100070346	99950388	-15507	3015	H2AFZ	-	CD8_Tcells	Exon	MEF2C,ZNF384,IKZF1,ERF::FOXI1,ETV2::FOXI1,FLI1::FOXI1,FOXO1::ELF1,FOXO1::ELK3	SPDEF,ZNF449,FOXO1::ELF1,FOXO1::ELK3	STAT5B
chr4-121221501-121222128	chr4	121221501	121222128	79931	TNIP3	121107461	121304056	121216627	-5186	79931	TNIP3	-	CD8_Tcells	Intron	TBX2,EOMES,TBX4,TBX5,ZNF384,SNAI1,TBX18,ELF3,ERF::FOXI1,TBX21,TBX3	TBR1,SNAI1,TBX18,ELF3,SCRT1,TCF3	STAT5B,BRD4
chr5-35810971-35811596	chr5	35810971	35811596	79925	SPEF2	35424217	35815931	35779168	32114	79925	SPEF2	+	CD8_Tcells	Intron	FOXD1,MEF2C,FOXI1,FOXL1,FOXO4,FOXO6,FOXP3,ZNF384,ATF2,FOXA3,CREB1,FOXA2,FOXK2,FOXP1,HOXB13,MEF2A,CREM	JUN,FOSB::JUN,NR2C1,CREB1,CREM	IRF4,STAT5B,BRD4,JUN
chr5-35822479-35823005	chr5	35822479	35823005	3575	IL7R	35815932	35856890	35852695	-29952	3575	IL7R	+	CD8_Tcells	Intron	RUNX2,RUNX3	ZNF135,ZNF708,RUNX3	BRD4,STAT5B
chr5-52743816-52744344	chr5	52743816	52744344	3672	ITGA1	52087051	52787918	52787896	-43815	3672	ITGA1	+	CD8_Tcells	Intron	RUNX3	RAX2,RUNX3	IRF4,STAT5B,BRD4
chr5-55096810-55097362	chr5	55096810	55097362	3001	GZMA	55066511	55131383	55102648	-5561	3001	GZMA	+	CD8_Tcells	Distal Intergenic	FOXD1,FOXI1,FOXL1,FOXO4,FOXO6,FOXP3,FOXK1,FOXA3,FOXA2,FOXK2,FOXP1	NKX2-3,KLF1
chr5-57117527-57118079	chr5	57117527	57118079	65056	GPBP1	57072812	57365382	57173948	-56144	65056	GPBP1	+	CD8_Tcells	Distal Intergenic	JDP2,RUNX2,ATF2,CREB1,RUNX3,ERF::FOXO1,FOXO1::ELF1	JUN,FOSL1::JUN,FOSB::JUNB,ZNF135,ZNF449,ZNF708,CREB1,RUNX3,FOXO1::ELF1	IRF4,STAT5B,JUN
chr5-62291684-62292330	chr5	62291684	62292330	3796	KIF2A	62020916	62306184	62306162	-14154	3796	KIF2A	+	CD8_Tcells	Distal Intergenic	RUNX2,FOXK1,FOXE1	NKX2-3,KLF1,KLF14,FOXE1
chr5-68711476-68712010	chr5	68711476	68712010	101928885	LINC02198	68661306	69061905	69029927	318183	101928885	LINC02198	-	CD8_Tcells	Intron	MEF2C,ELK4,ETV6,FLI1,ERF,ETS1,ETV2,ZBTB7A,ZNF384,IKZF1,ELF1,ELF3,ETV1,GABPA,MEF2A	FLI1,MIXL1,NKX6-2,ERF,SMAD3,ZNF652,ELF1,ELF3,ETV4,ELF2	STAT5B,IRF4
chr5-73387314-73388331	chr5	73387314	73388331	2297	FOXD1	73310779	73460629	73448362	60539	2297	FOXD1	-	CD8_Tcells	Intron	ELK4,FLI1,FOXI1,FOXL1,ERF,ETS1,ETV2,RUNX2,FOXO4,FOXO6,FOXP3,FOXK1,ZBTB7A,FERD3L,IKZF1,SNAI1,FOXA3,FOXA2,FOXK2,FOXP1,RUNX3,ERF::FOXI1,ERF::FOXO1,ETV2::FOXI1,FLI1::FOXI1,FOXO1::ELF1,FOXO1::ELK3	FLI1,ESRRB,ERF,NR2C1,SNAI1,ASCL1,RUNX3,SCRT1,SNAI2,FOXO1::ELF1,FOXO1::ELK3,ZNF418,ETV4,CEBPE	STAT5B,BRD4,IRF4
chr5-74974376-74975243	chr5	74974376	74975243	51301	GCNT4	74948926	75041771	75030899	56089	51301	GCNT4	-	CD8_Tcells	Exon	FOXD1,FOXI1,FOXL1,TBX2,ETV2,EOMES,TBX4,TBX5,FOXO4,FOXO6,FOXP3,IKZF1,TBX18,FOXA3,ETV1,FOXA2,FOXK2,FOXP1,GABPA,RUNX3,ERF::FOXI1,ERF::FOXO1,ETV2::FOXI1,FLI1::FOXI1,TBX21,TBX3	MEIS1,TBR1,HES6,TBX18,ATF4,RUNX3,KLF14	BRD4,STAT5B
chr5-80957918-80958473	chr5	80957918	80958473	5924	RASGRF2	80837939	81163100	80960672	-2476	5924	RASGRF2	+	CD8_Tcells	Intron	TBX2,EOMES,IKZF1,ATF2,CREB1,ELF1,ELF3,CREM,TBX21,TBX3	JUN,POU2F1,CREB1,ELF1,ELF3,SNAI2,CREM	IRF4
chr5-87340576-87341136	chr5	87340576	87341136	5921	RASA1	87254017	87369873	87337972	2883	5921	RASA1	+	CD8_Tcells	Intron	FLI1,ERF,ETS1,ETV2,ZNF384,FERD3L,IKZF1,ELF1,ETV1,GABPA,ERF::FOXI1,ETV2::FOXI1,FLI1::FOXI1,FOXO1::ELF1,FOXO1::ELK3	FLI1,ERF,ASCL1,ZNF449,ZNF708,ELF1,FOXO1::ELF1,FOXO1::ELK3	STAT5B,BRD4,IRF4
chr5-96794623-96795255	chr5	96794623	96795255	51752	ERAP1	96775065	96842019	96793671	-1267	51752	ERAP1	-	CD8_Tcells	Exon	SNAI1,HOXB13	NEUROG2,MAFA,SNAI1,ASCL1,TCF3	STAT5B,JUN,IRF4
chr5-123515819-123516466	chr5	123515819	123516466	1456	CSNK1G3	123467846	123991732	123512260	3881	1456	CSNK1G3	+	CD8_Tcells	Intron	ZNF384,IKZF1,ATF2,CREB1,RUNX3	JUN,ESRRB,ATF4,CREB1,NFIL3,RUNX3	IRF4,STAT5B,BRD4
chr5-131273525-131274043	chr5	131273525	131274043	56990	CDC42SE2	131208615	131416503	131264100	9683	56990	CDC42SE2	+	CD8_Tcells	Intron	MEF2C,ETS1,ZNF384,FERD3L,TBX18,MEF2A,TBX21,FOXE1,TBX3	SREBF1,SPDEF,TBX18,ZNF135,ZNF418,ETV4,FOXE1	JUN,IRF4,STAT5B
chr5-142800755-142801322	chr5	142800755	142801322	23092	ARHGAP26	142757993	143178706	142772717	28320	23092	ARHGAP26	+	CD8_Tcells	Intron	ETV2,FERD3L,IKZF1,SNAI1,ERF::FOXI1,ERF::FOXO1,ETV2::FOXI1,FLI1::FOXI1	JUN,ZEB1,SNAI1,ZNF140,ASCL1,ZNF652,SNAI2,TCF3	BRD4,JUN,IRF4,STAT5B
chr5-154813615-154814189	chr5	154813615	154814189	23367	LARP1	154699340	154818048	154811388	2513	23367	LARP1	+	CD8_Tcells	3' UTR	ELK4,RUNX2,ZBTB7A,ELF1,ELF3,ETV1,GABPA,MEF2A,FOXO1::ELF1,FOXO1::ELK3	SMAD3,TCF7L1,SMAD5,ELF1,ELF3,FOXO1::ELF1,FOXO1::ELK3,KLF7,KLF1,KLF14	STAT5B
chr5-180688969-180689822	chr5	180688969	180689822	2324	FLT4	180601629	180694861	180649624	-39770	2324	FLT4	-	CD8_Tcells	Distal Intergenic	MEF2C,ELK4,ETV6,FLI1,ERF,ETS1,ETV2,IKZF1,ELF1,ELF3,ETV1,GABPA,HOXB13,MEF2A,ERF::FOXI1,ETV2::FOXI1,FLI1::FOXI1,FOXO1::ELF1,FOXO1::ELK3	FLI1,NKX2-3,ERF,POU2F1,TBX19,ASCL1,ELF1,ELF3,FOXO1::ELF1,FOXO1::ELK3,ELF2,NR1D2	BRD4,STAT5B,IRF4
chr6-2860930-2862084	chr6	2860930	2862084	100616285	MIR4645	2848057	2865308	2854107	-7399	100616285	MIR4645	-	CD8_Tcells	Intron	FOXI1,FOXL1,RUNX2,TBX4,TBX5,FOXO4,FOXO6,FOXP3,ZNF384,IKZF1,SNAI1,TBX18,ELF3,GABPA,ERF::FOXI1,ERF::FOXO1,ETV2::FOXI1,FLI1::FOXI1,FOXO1::ELF1,FOXO1::ELK3,TBX3	SREBF1,NKX2-3,SPDEF,LBX2,POU2F1,ZEB1,CREB3L4,SNAI1,TBX18,ZNF140,ZSCAN29,ZNF708,ELF3,NKX2-5,SNAI2,TWIST1,FOXO1::ELF1,FOXO1::ELK3,KLF7,ZNF418,KLF1,KLF14	IRF4
chr6-2880070-2880639	chr6	2880070	2880639	221756	SERPINB9P1	2865309	2892343	2881407	1052	221756	SERPINB9P1	-	CD8_Tcells	Promoter	EOMES,TBX4,TBX5,ZNF384,TBX18,HOXB13,MEF2A,TBX3	SREBF1,TBX18
chr6-20837130-20837701	chr6	20837130	20837701	54901	CDKAL1	20469069	21356353	20546341	291073	54901	CDKAL1	+	CD8_Tcells	Intron	ETV2,ZNF384	SREBF1,ESRRB,NR2C1,ZNF652,ZNF418,ZNF669	IRF4,STAT5B
chr6-44923304-44923860	chr6	44923304	44923860	8464	SUPT3H	44695576	45151892	44955510	31927	8464	SUPT3H	-	CD8_Tcells	Intron	FOXI1,FOXL1,FOXO4,FOXO6,FOXP3,ZNF384,IKZF1,CREB1,FOXK2,FOXP1,ERF::FOXI1,ERF::FOXO1,FLI1::FOXI1,FOXO1::ELF1,FOXO1::ELK3,FOXE1	SREBF1,FOSB::JUN,TCF7L1,ZNF652,CREB1,FOXO1::ELF1,FOXO1::ELK3,FOXE1
chr6-44932460-44933272	chr6	44932460	44933272	8464	SUPT3H	44695576	45151892	44955510	22643	8464	SUPT3H	-	CD8_Tcells	Exon	ELK4,ETV6,ERF,ETS1,ZNF384,IKZF1,ELF1,ELF3,ETV1,GABPA,ERF::FOXI1,ETV2::FOXI1,FLI1::FOXI1,FOXO1::ELF1,FOXO1::ELK3,FOXE1	NKX2-3,ERF,NR2C1,ZNF140,ELF1,ELF3,ELK1::HOXA1,ELK1::HOXB13,ETV2::DRGX,FLI1::DRGX,FOXO1::ELF1,FOXO1::ELK3,FOXE1	IRF4,BRD4,STAT5B
chr6-71228382-71229216	chr6	71228382	71229216	79627	OGFRL1	71122921	71334203	71288803	-60003	79627	OGFRL1	+	CD8_Tcells	Intron	ELK4,JDP2,RUNX2,ZBTB7A,ZNF384,IKZF1,ELF1,ELF3,ETV1,GABPA,RUNX3	DBP,TBX19,FOSL1::JUN,FOSB::JUNB,ELF1,ELF3,NFIL3,RUNX3,ELK1::HOXB13,KLF14
chr6-96499655-96500214	chr6	96499655	96500214	23376	UFL1	96268790	96542178	96521595	-21660	23376	UFL1	+	CD8_Tcells	Intron	FOXD1,FOXI1,FOXL1,FOXO4,FOXO6,FOXP3,FOXK1,ZBTB7A,FOXA3,ELF1,ELF3,ETV1,FOXA2,FOXK2,FOXP1,GABPA,FOXE1	NKX2-3,HES6,ELF1,ELF3,SNAI2,KLF14,FOXE1
chr6-106117412-106118049	chr6	106117412	106118049	639	PRDM1	105744703	106150684	106098940	18789	639	PRDM1	+	CD8_Tcells	Intron	ZNF384,IKZF1,CREB1	TFEB,MEIS1,MAX,CREB3L4,NR2C1,SMAD5,TFEC,CREB1,ELK1::HOXA1	BRD4,IRF4,STAT5B,JUN
chr6-107618608-107619180	chr6	107618608	107619180	55084	SOBP	107474762	107683546	107634990	-16095	55084	SOBP	+	CD8_Tcells	Intron	RUNX2,ZNF384,IKZF1,ETV1,MEF2A,RUNX3,ETV2::FOXI1	SREBF1,NKX2-3,ASCL1,RUNX3,ELK1::HOXB13,ETV2::DRGX,FLI1::DRGX,KLF7,ZNF418,KLF1,KLF14	STAT5B,BRD4,IRF4
chr6-118810327-118810857	chr6	118810327	118810857	254394	MCM9	118769665	118861736	118829253	18660	254394	MCM9	-	CD8_Tcells	Distal Intergenic	ELK4,ETV6,FLI1,JDP2,ERF,ETS1,ZBTB7A,IKZF1,ELF1,ELF3,ETV1,GABPA,ERF::FOXI1,ETV2::FOXI1,FLI1::FOXI1	FLI1,ERF,MEIS1,TCF7L1,ZNF784,ELF1,ELF3,ETV4	IRF4,STAT5B,BRD4,JUN
chr6-119856061-119856698	chr6	119856061	119856698	100422951	MIR3144	119682471	120560674	120015179	-158799	100422951	MIR3144	+	CD8_Tcells	Distal Intergenic	MEF2C,MEF2A	MEIS1,HOXB3,FOSL1::JUN,FOSB::JUNB,MAFA,KLF1	IRF4
chr6-127880391-127880923	chr6	127880391	127880923	387357	THEMIS	127739067	127963354	127900958	20300	387357	THEMIS	-	CD8_Tcells	Intron	MEF2C,FLI1,TBX2,ERF,ETS1,ETV2,EOMES,ZNF384,SNAI1,ETV1,GABPA,MEF2A,TBX21	FLI1,ERF,TBR1,ZEB1,HES6,SNAI1,TCF3,ZNF418
chr6-127902872-127903436	chr6	127902872	127903436	387357	THEMIS	127739067	127963354	127901081	-2072	387357	THEMIS	-	CD8_Tcells	Intron	ZNF384,FERD3L,FOXE1	POU6F1,MIXL1,NKX6-2,TCF7L1,FOXE1
chr6-127978107-127978638	chr6	127978107	127978638	5796	PTPRK	127963355	128701907	128008077	29704	5796	PTPRK	-	CD8_Tcells	Intron	JDP2,ZBTB7A,ATF2,CREB1,ELF1,ELF3,GABPA,HOXB13,RUNX3,FOXE1	NEUROG2,RARA,FOSL1::JUN,FOSB::JUNB,HES6,NR2C1,CREB1,ELF1,ELF3,RUNX3,TWIST1,KLF7,KLF1,KLF14,FOXE1	IRF4
chr6-128258990-128260214	chr6	128258990	128260214	5796	PTPRK	127963355	128701907	128241299	-18302	5796	PTPRK	-	CD8_Tcells	Intron	MEF2C,ZNF384,SNAI1,CREB1,ELF3,MEF2A,FLI1::FOXI1	NEUROG2,NKX6-2,LBX2,RAX2,MEIS1,POU2F1,TCF7L1,SNAI1,ATF4,CREB1,ELF3,NFIL3,SNAI2,TCF3,ZNF418	IRF4,BRD4
chr6-130381669-130382187	chr6	130381669	130382187	114801	TMEM200A	130365580	130632261	130366281	15646	114801	TMEM200A	+	CD8_Tcells	Intron	ZNF384,IKZF1	SCRT1	BRD4,STAT5B,IRF4
chr6-130575906-130576432	chr6	130575906	130576432	114801	TMEM200A	130365580	130632261	130437117	139051	114801	TMEM200A	+	CD8_Tcells	Distal Intergenic	MEF2C,IKZF1,ETV1,GABPA,MEF2A	ESRRB,MEIS1,ASCL1,ZNF418	STAT5B,BRD4,IRF4,JUN
chr6-135094233-135094764	chr6	135094233	135094764	10767	HBS1L	134966848	135142185	135103056	8557	10767	HBS1L	-	CD8_Tcells	Intron	JDP2,ZNF384,TBX18,ERF::FOXI1,ERF::FOXO1,ETV2::FOXI1,FLI1::FOXI1,FOXO1::ELF1,FOXO1::ELK3,TBX21	FOSL1::JUN,FOSB::JUNB,TCF7L1,TBX18,ZNF135,FOXO1::ELF1,FOXO1::ELK3,KLF7,KLF1,KLF14	IRF4,BRD4,STAT5B
chr6-135102811-135103357	chr6	135102811	135103357	10767	HBS1L	134966848	135142185	135103056	-27	10767	HBS1L	-	CD8_Tcells	Promoter	MEF2C,ELK4,ZBTB7A,ZNF384,ELF1,ELF3,ETV1,GABPA,HOXB13,MEF2A	NEUROG2,NKX2-3,TFEB,HES6,NR2C1,ELF1,ELF3,SNAI2,TWIST1,ELK1::HOXA1,NR1D2	IRF4,BRD4,STAT5B
chr6-157569446-157569997	chr6	157569446	157569997	79683	ZDHHC14	157535859	157665754	157592773	-23051	79683	ZDHHC14	+	CD8_Tcells	Intron	RUNX2,ZNF384,IKZF1,HOXB13,MEF2A,RUNX3	ZNF784,RUNX3	BRD4,STAT5B,IRF4
chr6-169556645-169557237	chr6	169556645	169557237	253769	WDR27	169451639	169702119	169649233	92291	253769	WDR27	-	CD8_Tcells	Intron	MEF2C,RUNX2,CREB1,HOXB13,MEF2A,RUNX3	LBX2,RAX2,CREB1,RUNX3	STAT5B,IRF4
chr7-13910733-13911269	chr7	13910733	13911269	2115	ETV1	13297067	14130313	13906498	-4502	2115	ETV1	-	CD8_Tcells	Exon	MEF2C,JDP2,ATF2,CREB1,MEF2A,CREM	JUN,MIXL1,NEUROG2,NKX6-2,HOXB3,FOSB::JUN,FOSL1::JUN,FOSB::JUNB,CREB1,CREM	STAT5B,IRF4,JUN
chr7-35725126-35725828	chr7	35725126	35725828	64224	HERPUD2	35461364	35748079	35695571	-29905	64224	HERPUD2	-	CD8_Tcells	Intron	MEF2C,ERF,RUNX2,ZBTB7A,ZNF384,IKZF1,CREB1,GABPA,HOXB13,MEF2A,RUNX3	ERF,ZEB1,HES6,ZNF135,ASCL1,CREB1,RUNX3	BRD4,JUN,IRF4
chr7-36639731-36640573	chr7	36639731	36640573	313	AOAH	36630711	36793349	36661300	21147	313	AOAH	-	CD8_Tcells	Intron	FOXI1,FOXL1,FOXO4,FOXO6,FOXP3,FERD3L,IKZF1,FOXA3,ELF1,ELF3,ETV1,FOXK2,FOXP1,GABPA,ERF::FOXI1,ERF::FOXO1,ETV2::FOXI1,FLI1::FOXI1,FOXO1::ELF1,FOXO1::ELK3	SPDEF,ZNF135,ELF1,ELF3,FOXO1::ELF1,FOXO1::ELK3	BRD4,STAT5B,IRF4
chr7-36776903-36778284	chr7	36776903	36778284	313	AOAH	36630711	36793349	36724549	-53043	313	AOAH	-	CD8_Tcells	Distal Intergenic	FOXD1,MEF2C,ELK4,ETV6,FOXI1,FOXL1,TBX2,TBX4,TBX5,FOXO4,FOXO6,FOXP3,FOXK1,ZBTB7A,ZNF384,IKZF1,SNAI1,FOXA3,ELF1,ELF3,ETV1,FOXA2,FOXK2,FOXP1,GABPA,HOXB13,MEF2A,ERF::FOXI1,ERF::FOXO1,ETV2::FOXI1,FLI1::FOXI1	RARA,POU2F1,ZEB1,SNAI1,ELF1,ELF3,SCRT1,TCF3,TWIST1,ZNF418	BRD4,STAT5B
chr7-44891236-44891836	chr7	44891236	44891836	5814	PURB	44883581	44930233	44885361	-6174	5814	PURB	-	CD8_Tcells	Distal Intergenic	ELK4,ETV6,TBX2,ZBTB7A,TBX18,ATF2,CREB1,ELF1,ELF3,ETV1,GABPA,CREM	NR2C1,TBX18,ZNF135,ZNF708,CREB1,ELF1,ELF3,TWIST1,CREM
chr7-105675710-105676536	chr7	105675710	105676536	222255	ATXN7L1	105612571	105876712	105678018	1894	222255	ATXN7L1	-	CD8_Tcells	Intron	RUNX2,ZNF384,FERD3L,IKZF1,RUNX3	ZKSCAN1,TFEC,ZNF784,RUNX3,ZNF418	IRF4,BRD4
chr7-143310963-143311463	chr7	143310963	143311463	1180	CLCN1	143305366	143340615	143316126	-4912	1180	CLCN1	+	CD8_Tcells	Distal Intergenic	ETV6,ZNF384,ELF3,GABPA,FOXE1	ZKSCAN1,ZNF135,ELF3,ELK1::HOXB13,KLF7,ZNF418,KLF1,KLF14,FOXE1
chr7-151206726-151207489	chr7	151206726	151207489	392843	IQCA1L	151191056	151213740	151205496	-1610	392843	IQCA1L	-	CD8_Tcells	Distal Intergenic	TBX2,EOMES,TBX4,TBX5,IKZF1,TBX18,ETV1,HOXB13,RUNX3,TBX21,TBX3	NKX2-3,TFEB,TBR1,HES6,TBX18,TFEC,RUNX3,ZNF418
chr7-151768988-151769546	chr7	151768988	151769546	51422	PRKAG2	151542217	151876945	151790632	21364	51422	PRKAG2	-	CD8_Tcells	Intron	FOXD1,FOXI1,FOXL1,FOXO4,FOXO6,FOXP3,FOXK1,FOXA3,FOXA2,FOXK2,FOXP1,GABPA,RUNX3	TCF7L1,RUNX3,TWIST1	IRF4,STAT5B,BRD4
chr8-52782964-52783787	chr8	52782964	52783787	9821	RB1CC1	52600771	52842137	52745843	-37531	9821	RB1CC1	-	CD8_Tcells	Distal Intergenic	MEF2C,JDP2,ZNF384,FERD3L,HOXB13,MEF2A	POU2F1,ZKSCAN1,ZNF135	IRF4,BRD4
chr8-52793264-52793789	chr8	52793264	52793789	9821	RB1CC1	52600771	52842137	52745843	-47682	9821	RB1CC1	-	CD8_Tcells	Distal Intergenic	ELK4,ETV6,FLI1,ERF,ETS1,ETV2,ZBTB7A,IKZF1,ELF1,ELF3,ETV1,GABPA,ERF::FOXI1,ERF::FOXO1,ETV2::FOXI1,FLI1::FOXI1,FOXO1::ELF1,FOXO1::ELK3	FLI1,ERF,ELF1,ELF3,ELK1::HOXA1,ELK1::HOXB13,ETV2::DRGX,FLI1::DRGX,FOXO1::ELF1,FOXO1::ELK3,ETV4,ELF2	BRD4
chr8-60796502-60797053	chr8	60796502	60797053	55636	CHD7	60635235	60959844	60743032	53744	55636	CHD7	+	CD8_Tcells	Intron	ELK4,ETV6,FLI1,ERF,ETS1,ZBTB7A,ZNF384,IKZF1,ELF1,ELF3,ETV1,GABPA,ERF::FOXI1,ETV2::FOXI1,FLI1::FOXI1,FOXE1	FLI1,LBX2,ERF,ELF1,ELF3,ETV4,ELF2,FOXE1	STAT5B
chr8-60807735-60808283	chr8	60807735	60808283	55636	CHD7	60635235	60959844	60850737	-42727	55636	CHD7	+	CD8_Tcells	Exon	MEF2C,MEF2A	LBX2,ZNF652,ZNF418	BRD4,STAT5B,JUN,IRF4
chr8-70219294-70219950	chr8	70219294	70219950	63978	PRDM14	69953196	70237749	70071693	-147928	63978	PRDM14	-	CD8_Tcells	Intron	ELK4,ETV6,ZBTB7A,IKZF1,TBX18,ELF1,ELF3,ETV1,GABPA	ZEB1,TBX18,ASCL1,ZNF449,ELF1,ELF3,ETV2::DRGX,FLI1::DRGX,ELF2
chr8-86472315-86472886	chr8	86472315	86472886	51115	RMDN1	86468071	86482582	86474914	2313	51115	RMDN1	-	CD8_Tcells	3' UTR	MEF2C,ELK4,ETV6,TBX2,RUNX2,EOMES,TBX4,TBX5,ZBTB7A,ZNF384,FERD3L,SNAI1,CREB1,ELF1,ELF3,ETV1,GABPA,MEF2A,RUNX3	SNAI1,CREB1,ELF1,ELF3,RUNX3,SNAI2,TCF3
chr8-94419793-94420612	chr8	94419793	94420612	100861412	FSBP	94418263	94436943	94436942	16739	100861412	FSBP	-	CD8_Tcells	Intron	MEF2C,ELK4,ETV6,EOMES,ZBTB7A,ZNF384,TBX18,ELF1,ELF3,ETV1,GABPA,MEF2A	SREBF1,ESRRB,TBR1,TBX18,ZNF135,ELF1,ELF3	IRF4
chr8-120731103-120731633	chr8	120731103	120731633	6641	SNTB1	120606306	121226283	120693908	-37459	6641	SNTB1	-	CD8_Tcells	Intron	ETV2,RUNX2,TBX18,HOXB13,RUNX3,ERF::FOXI1,ERF::FOXO1,ETV2::FOXI1,FLI1::FOXI1,FOXO1::ELF1,FOXO1::ELK3,FOXE1	MAX,TBX18,RUNX3,FOXO1::ELF1,FOXO1::ELK3,FOXE1
chr8-127163631-127164202	chr8	127163631	127164202	103021165	CASC19	127142722	127211155	127203222	39305	103021165	CASC19	-	CD8_Tcells	Intron	TBX4,TBX5,ZNF384,FERD3L,HOXB13,FOXO1::ELF1,FOXO1::ELK3,FOXE1	JUN,RARA,ZNF140,SCRT1,SNAI2,ETV2::DRGX,FOXO1::ELF1,FOXO1::ELK3,FOXE1
chr8-133505141-133505858	chr8	133505141	133505858	6482	ST3GAL1	133388979	134041061	133499421	-6077	6482	ST3GAL1	-	CD8_Tcells	Intron	FOXD1,FOXI1,FOXL1,FOXO4,FOXO6,FOXP3,FOXK1,ZNF384,SNAI1,FOXA3,FOXA2,FOXK2,FOXP1,MEF2A,ETV2::FOXI1,FLI1::FOXI1,FOXO1::ELF1,FOXE1	JUN,SNAI1,ZNF135,ZNF708,ATF4,SNAI2,FOXO1::ELF1,FOXE1
chr8-134320046-134320583	chr8	134320046	134320583	57623	ZFAT	134041062	134756828	134510182	189867	57623	ZFAT	-	CD8_Tcells	Exon	ELK4,ETV6,TBX2,EOMES,TBX4,TBX5,ZBTB7A,TBX18,ELF1,ELF3,ETV1,GABPA,ERF::FOXI1,ETV2::FOXI1,FLI1::FOXI1,FOXO1::ELF1,FOXO1::ELK3,TBX21,TBX3	TBR1,TBX18,ZNF784,ATF4,ELF1,ELF3,NKX2-5,ETV2::DRGX,FLI1::DRGX,FOXO1::ELF1,FOXO1::ELK3,KLF7,KLF1,KLF14,NR1D2
chr8-142844541-142845081	chr8	142844541	142845081	2765	GML	142810420	142855299	142834801	10009	2765	GML	+	CD8_Tcells	Intron	ELK4,FLI1,ERF,ETS1,ETV2,RUNX2,IKZF1,ELF1,ETV1,GABPA,HOXB13,RUNX3	FLI1,ERF,FOSL1::JUN,ZNF140,ELF1,RUNX3,NR1D2
chr9-73163318-73163830	chr9	73163318	73163830	301	ANXA1	73116100	73832731	73160285	3288	301	ANXA1	+	CD8_Tcells	Exon	JDP2,ZNF384,ELF1,ELF3,ETV1,GABPA	NKX2-3,TFEB,ATF4,ELF1,ELF3,ETV2::DRGX
chr9-89479556-89480083	chr9	89479556	89480083	10507	SEMA4D	89360589	89551571	89479890	70	10507	SEMA4D	-	CD8_Tcells	Promoter	ELF3,GABPA,ERF::FOXI1,ERF::FOXO1,ETV2::FOXI1,FLI1::FOXI1,FOXO1::ELF1,FOXO1::ELK3	SPDEF,CREB3L4,ELF3,FOXO1::ELF1,FOXO1::ELK3,KLF7,ZNF418,KLF1,KLF14
chr9-92664582-92665176	chr9	92664582	92665176	64768	IPPK	92615438	92717538	92670265	5385	64768	IPPK	-	CD8_Tcells	Intron	ELK4,TBX2,ERF,ETS1,EOMES,ZBTB7A,IKZF1,TBX18,ELF1,ETV1,GABPA,ERF::FOXI1,ETV2::FOXI1,FLI1::FOXI1,FOXO1::ELF1,TBX21,TBX3	ERF,TBR1,NR2C1,TBX18,ZNF135,ZNF708,ELF1,ELK1::HOXA1,FOXO1::ELF1
chr9-99013477-99014167	chr9	99013477	99014167	1306	COL15A1	98895976	99071355	99038673	-24850	1306	COL15A1	+	CD8_Tcells	Intron	ELK4,ETV6,FLI1,ERF,ETS1,ETV2,ZBTB7A,ZNF384,IKZF1,ELF1,ELF3,ETV1,GABPA,HOXB13,ERF::FOXI1,ERF::FOXO1,ETV2::FOXI1,FLI1::FOXI1,FOXO1::ELF1,FOXO1::ELK3	FLI1,RARA,ERF,FOSL1::JUN,MAFA,ASCL1,ELF1,ELF3,FLI1::DRGX,FOXO1::ELF1,FOXO1::ELK3,ETV4,ELF2
chr9-105405305-105405980	chr9	105405305	105405980	83856	FSD1L	105401857	105529394	105447796	-42153	83856	FSD1L	+	CD8_Tcells	Intron	RUNX2,ZNF384,FERD3L,IKZF1,RUNX3	NKX2-3,RUNX3
chr9-120905152-120906316	chr9	120905152	120906316	7185	TRAF1	120904735	120945940	120914572	8837	7185	TRAF1	-	CD8_Tcells	Exon	ELK4,FLI1,ERF,ETS1,ETV2,ZBTB7A,ZNF384,FERD3L,SNAI1,TBX18,ELF1,ELF3,ETV1,GABPA,ERF::FOXI1,ETV2::FOXI1,FLI1::FOXI1,FOXO1::ELF1,FOXO1::ELK3	FLI1,ERF,ZEB1,SNAI1,TBX18,ZKSCAN1,ZNF135,ELF1,ELF3,SNAI2,TCF3,ELK1::HOXB13,FOXO1::ELF1,FOXO1::ELK3
chr9-126396991-126397603	chr9	126396991	126397603	89853	MVB12B	126096061	126402025	126395640	1656	89853	MVB12B	+	CD8_Tcells	3' UTR	SNAI1,ATF2,CREB1	JUN,TFEB,FOSB::JUN,SNAI1,ASCL1,CREB1,TWIST1,NR1D2
chr10-7121001-7121652	chr10	7121001	7121652	57713	SFMBT2	7094172	7490943	7408745	287418	57713	SFMBT2	-	CD8_Tcells	Distal Intergenic	FERD3L,ATF2,FOXE1	SREBF1,ESRRB,ZNF135,ASCL1,ATF4,NKX2-5,ELK1::HOXB13,ETV2::DRGX,FLI1::DRGX,FOXE1	BRD4,IRF4
chr10-7388524-7389061	chr10	7388524	7389061	57713	SFMBT2	7094172	7490943	7408745	19952	57713	SFMBT2	-	CD8_Tcells	Intron	ELK4,ETV6,TBX2,EOMES,ZBTB7A,ZNF384,TBX18,FOXA3,ELF1,ELF3,ETV1,FOXA2,GABPA,TBX21,TBX3	ZEB1,TBX18,ZNF135,ELF1,ELF3,KLF7,ZNF418,KLF1,KLF14,ELF2	BRD4,STAT5B
chr10-8331283-8331809	chr10	8331283	8331809	100507143	LINC00708	8159602	8772069	8268305	-63240	100507143	LINC00708	-	CD8_Tcells	Distal Intergenic	MEF2C,MEF2A	MAFA	IRF4
chr10-16948192-16948832	chr10	16948192	16948832	8029	CUBN	16900862	17152245	16984195	35682	8029	CUBN	-	CD8_Tcells	Exon		RAX2	STAT5B
chr10-26468711-26469250	chr10	26468711	26469250	54518	APBB1IP	26328199	26575904	26438425	30554	54518	APBB1IP	+	CD8_Tcells	Intron	MEF2C,FLI1,TBX2,RUNX2,EOMES,ZNF384,FERD3L,IKZF1,MEF2A,RUNX3,TBX21,TBX3	JUN,FLI1,RARA,TBR1,ZNF449,ZNF652,ATF4,RUNX3,ELK1::HOXB13,ZNF418	IRF4,BRD4
chr10-27257257-27257897	chr10	27257257	27257897	91452	ACBD5	27205252	27328249	27242130	-15446	91452	ACBD5	-	CD8_Tcells	Promoter	FLI1,FOXI1,FOXL1,ERF,FOXO4,FOXO6,FOXP3,FOXK1,FOXA3,FOXA2,FOXK2,FOXP1	FLI1,ERF,MEIS1,ELK1::HOXA1,ELK1::HOXB13,KLF7,ZNF418,ZNF669,KLF1,KLF14,ETV4	IRF4
chr10-68314213-68314736	chr10	68314213	68314736	64081	PBLD	68260534	68319026	68306879	-7594	64081	PBLD	-	CD8_Tcells	Intron	ELK4,ETV6,ZBTB7A,ZNF384,ELF1,ETV1,GABPA	SREBF1,ZNF135,ELF1,ELK1::HOXB13	BRD4,IRF4,STAT5B
chr10-70091949-70092488	chr10	70091949	70092488	84883	AIFM2	70085616	70138884	70118351	26132	84883	AIFM2	-	CD8_Tcells	3' UTR	ELK4,ETV6,ZBTB7A,ZNF384,ELF1,ELF3,ETV1,GABPA,ETV2::FOXI1,FOXE1	ZNF135,ELF1,ELF3,ELF2,FOXE1	BRD4
chr10-70578294-70578909	chr10	70578294	70578909	5551	PRF1	70540791	70637789	70602759	24157	5551	PRF1	-	CD8_Tcells	Intron	MEF2C,TBX4,TBX5,MEF2A	SREBF1,FOSL1::JUN,ELK1::HOXB13	BRD4,STAT5B,JUN,IRF4
chr10-84356889-84357443	chr10	84356889	84357443	54462	CCSER2	84304289	84825087	84328663	28502	54462	CCSER2	+	CD8_Tcells	Intron	FOXI1,FOXL1,TBX2,FOXO4,FOXO6,FOXP3,FOXK1,TBX18,FOXA3,FOXA2,FOXK2,FOXP1,RUNX3,FOXO1::ELF1,TBX21,TBX3	JUN,NEUROG2,POU2F1,TBR1,FOSL1::JUN,FOSB::JUNB,TBX18,NKX2-5,RUNX3,FOXO1::ELF1,ZNF669	STAT5B,IRF4
chr10-91033985-91034546	chr10	91033985	91034546	100874184	LINC00502	90984222	91105089	91047166	-12900	100874184	LINC00502	+	CD8_Tcells	Promoter	ELK4,ETV2,IKZF1,ELF1,ELF3,ETV1,GABPA,MEF2A,ERF::FOXI1,ETV2::FOXI1,FLI1::FOXI1,FOXO1::ELF1,FOXO1::ELK3	ELF1,ELF3,FOXO1::ELF1,FOXO1::ELK3,ZNF418,ELF2	STAT5B,BRD4,IRF4
chr10-110868911-110869808	chr10	110868911	110869808	27250	PDCD4	110853487	110894364	110871795	-2435	27250	PDCD4	+	CD8_Tcells	Exon	ELK4,ETV6,ERF,ETS1,ZNF384,ELF1,ELF3,ETV1,GABPA,HOXB13	ERF,ASCL1,ELF1,ELF3,KLF7,KLF1,KLF14,ELF2	BRD4,IRF4
chr10-119642443-119643047	chr10	119642443	119643047	9531	BAG3	119624200	119691353	119651370	-8624	9531	BAG3	+	CD8_Tcells	Distal Intergenic	RUNX2,ATF2,CREB1,RUNX3	JUN,FOSB::JUN,MAFA,NR2C1,ZNF135,CREB1,RUNX3,KLF7,KLF1,KLF14	JUN
chr10-123160523-123161096	chr10	123160523	123161096	9184	BUB3	123151200	123414304	123162254	-1444	9184	BUB3	+	CD8_Tcells	Exon	ELK4,ETV6,FLI1,ERF,ETS1,ETV2,ZBTB7A,ZNF384,IKZF1,ELF1,ELF3,ETV1,GABPA,ERF::FOXI1,ERF::FOXO1,ETV2::FOXI1,FLI1::FOXI1,FOXO1::ELF1,FOXO1::ELK3	FLI1,ESRRB,ERF,MEIS1,TBX19,ELF1,ELF3,FOXO1::ELF1,FOXO1::ELK3,ETV4,ELF2	BRD4
chr10-128103002-128103542	chr10	128103002	128103542	4288	MKI67	128085756	128153708	128103128	-143	4288	MKI67	-	CD8_Tcells	Promoter		MAX,TCF7L1,HES6,TFEC,ZNF449,ZNF418	STAT5B,IRF4
chr11-35330823-35331396	chr11	35330823	35331396	6506	SLC1A2	35242545	35428144	35301528	-29580	6506	SLC1A2	-	CD8_Tcells	Intron	FOXD1,ETV6,FOXI1,FOXL1,TBX4,TBX5,FOXO4,FOXO6,FOXP3,FOXK1,FOXA3,ELF1,ELF3,FOXA2,FOXK2,FOXP1,GABPA,ETV2::FOXI1,FLI1::FOXI1	TFEB,MAX,TFEC,ELF1,ELF3,ZNF418,KLF1	BRD4,STAT5B
chr11-96123263-96123780	chr11	96123263	96123780	84441	MAML2	96009396	96217473	96093520	-30000	84441	MAML2	-	CD8_Tcells	Intron	ZNF384,ATF2,CREB1	JUN,ZEB1,TCF7L1,TFEC,CREB1,SCRT1
chr11-96211363-96211877	chr11	96211363	96211877	84441	MAML2	96009396	96217473	96093520	-118099	84441	MAML2	-	CD8_Tcells	Intron	MEF2C,ZNF384,CREB1,MEF2A	CREB1,NKX2-5	BRD4
chr11-118200808-118201365	chr11	118200808	118201365	120425	JAML	118191032	118238707	118205390	4303	120425	JAML	-	CD8_Tcells	Exon	ETV2,RUNX2,ERF::FOXO1,FOXE1	ZNF140,FOXE1	BRD4,STAT5B,JUN,IRF4
chr11-122838166-122838759	chr11	122838166	122838759	56253	CRTAM	122816640	122873559	122838500	-37	56253	CRTAM	+	CD8_Tcells	Promoter	ETV6,TBX4,TBX5,TBX18,ATF2,CREB1,ELF3,GABPA,CREM,TBX3	JUN,TBX19,FOSB::JUN,NR2C1,TBX18,CREB1,ELF3,CREM	IRF4
chr11-122843277-122843858	chr11	122843277	122843858	56253	CRTAM	122816640	122873559	122838500	5066	56253	CRTAM	+	CD8_Tcells	Intron	FOXD1,ELK4,ETV6,FOXI1,FOXL1,FOXO4,FOXO6,FOXP3,TBX18,FOXA3,CREB1,ELF1,ELF3,FOXA2,FOXK2,FOXP1,GABPA,CREM	NEUROG2,NR2C1,TBX18,ZNF784,ZNF708,CREB1,ELF1,ELF3,CREM,ELK1::HOXB13	IRF4,BRD4,STAT5B
chr12-1277798-1278321	chr12	1277798	1278321	23085	ERC1	991200	1486591	1257138	20920	23085	ERC1	+	CD8_Tcells	Intron	FERD3L,HOXB13,MEF2A	MEIS1,TCF7L1,NFIL3	IRF4
chr12-6774534-6775310	chr12	6774534	6775310	3902	LAG3	6770783	6782154	6772520	2401	3902	LAG3	+	CD8_Tcells	Exon	ZBTB7A,IKZF1,TBX18,ELF1,ELF3,ETV1,GABPA	SREBF1,MEIS1,TBX18,ASCL1,ELF1,ELF3,ZNF669,KLF14	IRF4,STAT5B
chr12-10293441-10293993	chr12	10293441	10293993	3824	KLRD1	10219844	10347838	10304446	-10728	3824	KLRD1	+	CD8_Tcells	Intron	MEF2C,ELK4,ETV6,FLI1,ERF,ETS1,ETV2,ZBTB7A,ZNF384,IKZF1,ELF1,ELF3,ETV1,GABPA,MEF2A,RUNX3,ERF::FOXI1,ERF::FOXO1,ETV2::FOXI1,FLI1::FOXI1,FOXO1::ELF1,FOXO1::ELK3	FLI1,ERF,TCF7L1,ELF1,ELF3,RUNX3,SNAI2,FOXO1::ELF1,FOXO1::ELK3,ETV4	IRF4,STAT5B
chr12-10394430-10394986	chr12	10394430	10394986	22914	KLRK1	10347839	10400815	10391874	-2833	22914	KLRK1	-	CD8_Tcells	Intron	FOXE1	ARNT::HIF1A,TCF7L1,FOXE1	IRF4
chr12-10552965-10553510	chr12	10552965	10553510	55110	MAGOHB	10531363	10621630	10608040	54802	55110	MAGOHB	-	CD8_Tcells	Promoter	ZNF384,TBX18,ERF::FOXO1,FOXE1	LBX2,POU2F1,TBX18,KLF7,ZNF418,KLF1,KLF14,FOXE1
chr12-10554098-10555144	chr12	10554098	10555144	55110	MAGOHB	10531363	10621630	10608040	53418	55110	MAGOHB	-	CD8_Tcells	Promoter	ZNF384,IKZF1,SNAI1,RUNX3	ZEB1,SNAI1,ZNF135,ATF4,NKX2-5,RUNX3,TCF3,ETV2::DRGX,ZNF418,KLF1,KLF14,NR1D2	JUN,STAT5B,BRD4,IRF4
chr12-31964781-31965596	chr12	31964781	31965596	55196	KIAA1551	31923287	32047025	31962489	2698	55196	KIAA1551	+	CD8_Tcells	Intron	MEF2C,ERF,FOXK1,ZNF384,MEF2A	SREBF1,DBP,RARA,ERF,POU2F1,ZNF135,NFIL3,ZNF418,KLF1,KLF14	IRF4
chr12-39669406-39669951	chr12	39669406	39669951	283461	C12orf40	39622960	39749049	39626218	43459	283461	C12orf40	+	CD8_Tcells	Intron	FOXD1,FOXI1,FOXL1,ETS1,ETV2,FOXO4,FOXO6,FOXP3,FOXK1,FERD3L,IKZF1,FOXA3,ELF3,ETV1,FOXA2,FOXK2,FOXP1,GABPA,ERF::FOXI1,ERF::FOXO1,ETV2::FOXI1,FLI1::FOXI1,FOXO1::ELF1,FOXO1::ELK3	NKX2-3,ZEB1,ELF3,FOXO1::ELF1,FOXO1::ELK3,KLF1,KLF14
chr12-44812007-44812523	chr12	44812007	44812523	4753	NELL2	44420966	44986473	44777122	-35142	4753	NELL2	-	CD8_Tcells	Intron	TBX18	TBX18
chr12-44828001-44828608	chr12	44828001	44828608	4753	NELL2	44420966	44986473	44851847	23542	4753	NELL2	-	CD8_Tcells	Intron	ELK4,ETV6,ZBTB7A,ELF1,ELF3,ETV1,GABPA,FOXE1	JUN,SREBF1,MIXL1,LBX2,RAX2,ELF1,ELF3,ZNF418,FOXE1	STAT5B,BRD4
chr12-44847762-44849154	chr12	44847762	44849154	4753	NELL2	44420966	44986473	44851847	3388	4753	NELL2	-	CD8_Tcells	Intron	MEF2C,ELK4,ETV6,FLI1,FOXI1,FOXL1,ERF,ETS1,ETV2,TBX4,TBX5,FOXO4,FOXO6,FOXP3,FOXK1,ZBTB7A,ZNF384,IKZF1,SNAI1,ATF2,FOXA3,CREB1,ELF1,ELF3,ETV1,FOXA2,FOXK2,FOXP1,GABPA,MEF2A,ERF::FOXI1,ERF::FOXO1,ETV2::FOXI1,FLI1::FOXI1,FOXO1::ELF1,FOXO1::ELK3,FOXE1	JUN,FLI1,SPDEF,RARA,ERF,ZEB1,MAFA,NR2C1,SNAI1,ZNF135,CREB1,ELF1,ELF3,SCRT1,SNAI2,TCF3,FOXO1::ELF1,FOXO1::ELK3,KLF7,KLF1,KLF14,ETV4,ELF2,FOXE1,NR1D2	IRF4,BRD4,STAT5B
chr12-106747664-106748364	chr12	106747664	106748364	55188	RIC8B	106729702	106917723	106774595	-26580	55188	RIC8B	+	CD8_Tcells	Intron	MEF2C,TBX2,TBX4,TBX5,ZNF384,IKZF1,TBX18,ELF1,ETV1,GABPA,MEF2A,ERF::FOXI1,ERF::FOXO1,FLI1::FOXI1,FOXE1	JUN,ESRRB,TBX18,ZNF135,ZNF140,ZNF784,ELF1,CEBPE,FOXE1	STAT5B,BRD4
chr13-22061315-22062599	chr13	22061315	22062599	100506622	LINC00540	21959568	22695618	22040975	20981	100506622	LINC00540	+	CD8_Tcells	Intron	MEF2C,FOXI1,FOXL1,TBX2,ETS1,ETV2,EOMES,FOXO4,FOXO6,FOXP3,ZNF384,IKZF1,SNAI1,FOXA3,ELF1,ELF3,ETV1,FOXA2,FOXK2,FOXP1,GABPA,MEF2A,ERF::FOXI1,ERF::FOXO1,ETV2::FOXI1,FLI1::FOXI1,FOXO1::ELF1,FOXO1::ELK3,TBX21,FOXE1	DBP,MEIS1,ZEB1,SNAI1,ASCL1,ELF1,ELF3,NFIL3,TCF3,ETV2::DRGX,FLI1::DRGX,FOXO1::ELF1,FOXO1::ELK3,KLF1,KLF14,FOXE1	STAT5B,BRD4,IRF4
chr13-26372675-26373205	chr13	26372675	26373205	1024	CDK8	26238299	26478888	26385211	-12270	1024	CDK8	+	CD8_Tcells	Intron	SNAI1,ELF1,ETV1,GABPA	NKX2-3,ZEB1,TCF7L1,SNAI1,ZNF652,ELF1,TCF3
chr13-32791341-32792268	chr13	32791341	32792268	23047	PDS5B	32562657	32840920	32770190	21613	23047	PDS5B	+	CD8_Tcells	Distal Intergenic	ELK4,ETV6,FLI1,JDP2,ERF,ETS1,ETV2,ZBTB7A,ZNF384,IKZF1,SNAI1,TBX18,ELF1,ELF3,ETV1,GABPA,MEF2A,ERF::FOXI1,ERF::FOXO1,ETV2::FOXI1,FLI1::FOXI1,FOXO1::ELF1,FOXO1::ELK3	FLI1,ERF,ZEB1,FOSL1::JUN,FOSB::JUNB,TCF7L1,SNAI1,TBX18,ZNF135,ELF1,ELF3,SNAI2,FOXO1::ELF1,FOXO1::ELK3,ZNF418,ETV4,ELF2	IRF4,STAT5B
chr13-33786805-33787757	chr13	33786805	33787757	5983	RFC3	33747409	34182551	33818049	-30767	5983	RFC3	+	CD8_Tcells	Distal Intergenic	MEF2C,TBX2,EOMES,TBX4,TBX5,ZNF384,TBX18,MEF2A,TBX21,FOXE1,TBX3	NEUROG2,TFEB,TBX18,ZNF135,FOXE1	IRF4,BRD4,STAT5B
chr13-41916422-41917082	chr13	41916422	41917082	23078	VWA8	41632258	42000578	41961084	44331	23078	VWA8	-	CD8_Tcells	Intron	MEF2C,JDP2,FOXK2,FOXP1,MEF2A,FOXE1	FOSL1::JUN,FOSB::JUNB,TCF7L1,TWIST1,ZNF418,FOXE1	STAT5B,BRD4
chr13-74549991-74550559	chr13	74549991	74550559	338864	LINC00347	74426856	74902222	74552503	-2227	338864	LINC00347	+	CD8_Tcells	Intron	MEF2C,FOXI1,FOXL1,TBX2,EOMES,TBX4,TBX5,FOXO4,FOXO6,FOXP3,FOXK1,IKZF1,TBX18,FOXA3,ETV1,FOXK2,GABPA,HOXB13,MEF2A,ERF::FOXI1,ETV2::FOXI1,FLI1::FOXI1,FOXO1::ELF1,FOXO1::ELK3,TBX21,TBX3	NKX6-2,TBR1,TBX18,ATF4,FOXO1::ELF1,FOXO1::ELK3
chr13-111189132-111189667	chr13	111189132	111189667	8874	ARHGEF7	111149191	111299506	111186854	2544	8874	ARHGEF7	+	CD8_Tcells	Intron	ETV2		BRD4
chr14-31124128-31124696	chr14	31124128	31124696	25831	HECTD1	31083845	31252762	31123670	-741	25831	HECTD1	-	CD8_Tcells	Intron	RUNX2,ZNF384,RUNX3,FOXO1::ELF1	NKX2-5,RUNX3,FOXO1::ELF1	STAT5B,IRF4
chr14-41749362-41749908	chr14	41749362	41749908	145581	LRFN5	41281235	43103353	41699427	50207	145581	LRFN5	+	CD8_Tcells	Intron	FOXD1,MEF2C,FOXI1,FOXL1,FOXO4,FOXO6,FOXP3,FOXK1,IKZF1,ATF2,FOXA3,FOXA2,FOXK2,FOXP1,HOXB13	LHX6,MIXL1,LBX2,RARA,HOXB3,ATF4,NKX2-5	IRF4
chr14-49863866-49864414	chr14	49863866	49864414	378706	RN7SL2	49857915	49877970	49862849	-1290	378706	RN7SL2	-	CD8_Tcells	Promoter	ZNF384,FERD3L,ATF2,CREB1,MEF2A	JUN,ESRRB,TCF7L1,ATF4,CREB1,NFIL3
chr14-72810095-72810821	chr14	72810095	72810821	8110	DPF3	72607917	72910224	72836483	26024	8110	DPF3	-	CD8_Tcells	Intron	ZBTB7A,FERD3L	ZNF135,ZNF652,KLF7,KLF1,KLF14	BRD4,STAT5B
chr14-103748409-103748963	chr14	103748409	103748963	23368	PPP1R13B	103734564	103847655	103747397	-1288	23368	PPP1R13B	-	CD8_Tcells	Intron	ETS1,ZBTB7A	ZEB1,ATF4,SCRT1,SNAI2,KLF1,KLF14,ETV4	BRD4,STAT5B
chr16-56262020-56262698	chr16	56262020	56262698	100500891	MIR3935	56235950	56291133	56245520	16838	100500891	MIR3935	+	CD8_Tcells	Intron	JDP2,EOMES,FOXK1,ZNF384,IKZF1,SNAI1,ELF1,ELF3,ETV1,GABPA,ERF::FOXI1,ERF::FOXO1,ETV2::FOXI1,FLI1::FOXI1,FOXO1::ELF1,FOXO1::ELK3,TBX21,FOXE1	ZEB1,FOSL1::JUN,FOSB::JUNB,TCF7L1,SNAI1,ZNF449,ELF1,ELF3,SNAI2,FOXO1::ELF1,FOXO1::ELK3,FOXE1
chr16-56708359-56708888	chr16	56708359	56708888	9688	NUP93	56706294	56850074	56730105	-21481	9688	NUP93	+	CD8_Tcells	Exon	FERD3L,IKZF1,SNAI1,ETV1,HOXB13,ERF::FOXI1,ETV2::FOXI1,FLI1::FOXI1,FOXO1::ELF1,FOXO1::ELK3,FOXE1	NEUROG2,SPDEF,ZEB1,SNAI1,TCF3,FOXO1::ELF1,FOXO1::ELK3,ZNF418,FOXE1	IRF4,STAT5B,BRD4
chr16-57128667-57129200	chr16	57128667	57129200	221184	CPNE2	57086769	57159714	57129052	-118	221184	CPNE2	+	CD8_Tcells	Promoter	IKZF1,ERF::FOXO1,ETV2::FOXI1,FLI1::FOXI1,FOXO1::ELK3	FOSL1::JUN,FOSB::JUNB,ZKSCAN1,FOXO1::ELK3,NR1D2	IRF4,JUN
chr16-70026034-70026659	chr16	70026034	70026659	100302243	MIR1972-1	70026139	70048082	70030346	-3999	100302243	MIR1972-1	+	CD8_Tcells	Intron	ELK4,ETV6,ZBTB7A,ZNF384,IKZF1,ELF1,ELF3,ETV1,GABPA,ERF::FOXI1,ERF::FOXO1,ETV2::FOXI1,FLI1::FOXI1,FOXO1::ELF1,FOXO1::ELK3,FOXE1	TFEB,TCF7L1,ZNF135,ELF1,ELF3,TWIST1,FOXO1::ELF1,FOXO1::ELK3,FOXE1
chr16-89096914-89097572	chr16	89096914	89097572	197322	ACSF3	89032790	89152548	89098711	-1467	197322	ACSF3	+	CD8_Tcells	Intron	ETV6,TBX4,TBX5,SNAI1,TBX18,TBX3	FOSB::JUNB,SNAI1,TBX18,SNAI2,ZNF669,ETV4	IRF4,JUN,STAT5B,BRD4
chr16-89785446-89785979	chr16	89785446	89785979	2175	FANCA	89738736	89816646	89779957	-5754	2175	FANCA	-	CD8_Tcells	Intron	ZNF384,RUNX3,FOXE1	NKX2-3,SPDEF,RUNX3,ZNF669,FOXE1	STAT5B,BRD4
chr18-63197125-63198086	chr18	63197125	63198086	596	BCL2	63034079	63328075	63161869	-35735	596	BCL2	-	CD8_Tcells	Intron	SNAI1,ATF2,CREB1,ELF1,ELF3,ETV1,GABPA,ERF::FOXI1,FOXE1	JUN,TFEB,ESRRB,TBX19,FOSB::JUN,TCF7L1,SNAI1,ATF4,CREB1,ELF1,ELF3,NFIL3,SCRT1,SNAI2,KLF1,FOXE1	BRD4
chr18-67241177-67241773	chr18	67241177	67241773	100847002	MIR5011	66842862	67299282	67081584	159890	100847002	MIR5011	+	CD8_Tcells	Distal Intergenic	ETV6,ETS1,ETV2,ZNF384,IKZF1,ELF1,ELF3,ETV1,GABPA,ERF::FOXI1,ERF::FOXO1,ETV2::FOXI1,FLI1::FOXI1,FOXO1::ELF1,FOXO1::ELK3	TBX19,ATF4,ELF1,ELF3,FOXO1::ELF1,FOXO1::ELK3	STAT5B
chr18-76721077-76722080	chr18	76721077	76722080	400661	LINC01879	76664521	76756318	76690029	31548	400661	LINC01879	+	CD8_Tcells	Distal Intergenic	MEF2C,FERD3L,IKZF1,CREB1,MEF2A	ESRRB,ZKSCAN1,ASCL1,CREB1	IRF4,BRD4,STAT5B
chr19-29277034-29277627	chr19	29277034	29277627	7386	UQCRFS1	29108067	29370020	29213541	-63788	7386	UQCRFS1	-	CD8_Tcells	Intron	ELF1,ELF3,ETV1,GABPA	SREBF1,RARA,ELF1,ELF3,KLF7,KLF1,KLF14	IRF4
chr19-29587458-29588063	chr19	29587458	29588063	10775	POP4	29565259	29639440	29604017	-16256	10775	POP4	+	CD8_Tcells	Distal Intergenic	MEF2C,ELK4,JDP2,ZBTB7A,ELF1,ETV1,GABPA,MEF2A,RUNX3,CREM	FOSL1::JUN,FOSB::JUNB,HES6,NR2C1,TFEC,ELF1,RUNX3,CREM,KLF14	IRF4,STAT5B,JUN
chr20-53884672-53885196	chr20	53884672	53885196	8537	BCAS1	53794885	54048592	53995929	110994	8537	BCAS1	-	CD8_Tcells	Distal Intergenic	GABPA	RARA,NR1D2	IRF4,JUN,BRD4,STAT5B
chr20-56460356-56460887	chr20	56460356	56460887	51507	RTFDC1	56440447	56483147	56468585	-7963	51507	RTFDC1	+	CD8_Tcells	3' UTR	FOXD1,MEF2C,FOXI1,FOXL1,FOXO4,FOXO6,FOXP3,FOXK1,IKZF1,ATF2,FOXA3,CREB1,ETV1,FOXA2,FOXK2,FOXP1,GABPA,HOXB13,MEF2A,ERF::FOXO1,ETV2::FOXI1	JUN,FOSB::JUN,TCF7L1,ZNF135,ATF4,CREB1	IRF4
chr21-15733692-15734210	chr21	15733692	15734210	29761	USP25	15397513	15973259	15730025	3925	29761	USP25	+	CD8_Tcells	Intron	TBX2,TBX18,ELF1,ETV1,GABPA,ERF::FOXI1,ERF::FOXO1,ETV2::FOXI1,FLI1::FOXI1,FOXO1::ELF1,FOXO1::ELK3,FOXE1	TBX18,ZNF135,ELF1,FOXO1::ELF1,FOXO1::ELK3,FOXE1	BRD4,IRF4
chr21-15823704-15824213	chr21	15823704	15824213	29761	USP25	15397513	15973259	15825010	-1051	29761	USP25	+	CD8_Tcells	Exon	ETV1,GABPA	SNAI2
chr21-17775275-17776256	chr21	17775275	17776256	246312	C21orf91-OT1	17702729	17805771	17792509	16743	246312	C21orf91-OT1	-	CD8_Tcells	Intron	FOXD1,ELK4,FOXI1,FOXL1,ERF,ETS1,FOXO4,FOXO6,FOXP3,FOXK1,FERD3L,IKZF1,FOXA3,ELF1,ETV1,FOXA2,FOXK2,FOXP1,GABPA,ERF::FOXO1,ETV2::FOXI1,FOXO1::ELF1	SREBF1,ERF,ZEB1,ZKSCAN1,ZNF449,ZNF708,ELF1,TCF3,TWIST1,ELK1::HOXA1,ELK1::HOXB13,ETV2::DRGX,FLI1::DRGX,FOXO1::ELF1,KLF7,KLF1,KLF14
chr21-17794477-17795500	chr21	17794477	17795500	246312	C21orf91-OT1	17702729	17805771	17792523	-2464	246312	C21orf91-OT1	-	CD8_Tcells	Exon	MEF2C,TBX4,TBX5,ZNF384,IKZF1,SNAI1,TBX18,HOXB13,MEF2A,FOXO1::ELF1,TBX3	JUN,NKX2-3,TFEB,SNAI1,TBX18,ZNF135,ATF4,SNAI2,FOXO1::ELF1,KLF1
chr21-17799362-17799887	chr21	17799362	17799887	246312	C21orf91-OT1	17702729	17805771	17792523	-7100	246312	C21orf91-OT1	-	CD8_Tcells	Intron	ELF1,GABPA,MEF2A	ZNF652,ELF1,KLF1,NR1D2
chr21-31012382-31012907	chr21	31012382	31012907	728299	KRTAP19-8	30960016	31084348	31038476	25831	728299	KRTAP19-8	-	CD8_Tcells	Distal Intergenic	ZBTB7A,IKZF1	ELF2
chr21-33937811-33938358	chr21	33937811	33938358	100506334	LINC00649	33935508	34020124	33939408	-1323	100506334	LINC00649	+	CD8_Tcells	Exon	ZNF384,IKZF1,ELF1,ELF3,ETV1,GABPA,ERF::FOXI1,ERF::FOXO1,ETV2::FOXI1,FLI1::FOXI1,FOXO1::ELK3	RARA,ZNF135,ASCL1,ELF1,ELF3,TWIST1,FOXO1::ELK3
chr21-42417468-42417968	chr21	42417468	42417968	53347	UBASH3A	42400147	42449967	42403917	13800	53347	UBASH3A	+	CD8_Tcells	Exon	ELK4,TBX2,EOMES,TBX4,TBX5,ZBTB7A,ZNF384,TBX18,ELF1,ETV1,GABPA,RUNX3,TBX21,TBX3	TBR1,MAX,TBX18,ELF1,NKX2-5,RUNX3,TCF3,ZNF418	IRF4
chr21-44657414-44658239	chr21	44657414	44658239	386683	KRTAP12-3	44656296	44662429	44657932	-105	386683	KRTAP12-3	+	CD8_Tcells	Promoter	MEF2C,FOXI1,FOXL1,RUNX2,FOXO4,FOXO6,FOXP3,FOXK1,FERD3L,FOXA3,ELF1,ETV1,FOXK2,GABPA,RUNX3,ERF::FOXI1,ERF::FOXO1,ETV2::FOXI1,FLI1::FOXI1,FOXO1::ELF1,FOXO1::ELK3	SPDEF,ASCL1,ZNF449,ELF1,RUNX3,FOXO1::ELF1,FOXO1::ELK3,ZNF418	BRD4,IRF4,STAT5B
chrX-1471645-1472386	chrX	1471645	1472386	8623	ASMTL	1419451	1474057	1453762	-18252	8623	ASMTL	-	CD8_Tcells	Intron	FERD3L,IKZF1,ATF2,ELF3,HOXB13,ERF::FOXO1,FOXO1::ELK3	ZKSCAN1,ELF3,SCRT1,FOXO1::ELK3,KLF1
chrX-19751905-19752501	chrX	19751905	19752501	30011	SH3KBP1	19589989	19908749	19747703	-4499	30011	SH3KBP1	-	CD8_Tcells	Intron	MEF2C,EOMES,TBX4,TBX5,TBX18,ATF2,CREB1,MEF2A,CREM,TBX3	JUN,NKX2-3,ESRRB,FOSB::JUN,TBX18,ZNF652,CREB1,CREM,KLF1
chrX-65866020-65866634	chrX	65866020	65866634	407008	MIR223	65843271	66026267	66018870	-152542	407008	MIR223	+	CD8_Tcells	Distal Intergenic	ETV2,IKZF1,ATF2,RUNX3	ESRRB,ZNF449,NFIL3,RUNX3,FLI1::DRGX,KLF7,ZNF418,KLF1,KLF14
chr1-24911006-24911545	chr1	24911006	24911545	102465437	MIR6731	24832413	24924107	24919416	8140	102465437	MIR6731	-	NK	Intron	MEIS1,RUNX3	FOS,FOXL1,MEIS2,KLF3,ETV7,ZNF341,MAFK
chr1-24911765-24913462	chr1	24911765	24913462	102465437	MIR6731	24832413	24924107	24919416	6802	102465437	MIR6731	-	NK	Intron	TBX2,TBX20,EOMES,MGA,TBR1,TBX15,TBX1,TBX4,TBX5,PLAGL2,TBX18,ELF3,TBX21,TBX3	TBX20,ZBTB7C,PKNOX2,TBR1,TBX1,TBX5,MYCN,KLF3,TBX18,ZNF460,ZNF16,ZNF341,ESRRA,SPIB,TCF3,ETV2::FIGLA,HOXD12::ELK1
chr1-24915324-24916581	chr1	24915324	24916581	102465437	MIR6731	24832413	24924107	24919416	3463	102465437	MIR6731	-	NK	Intron	ELK4,TBX2,TBX20,MEIS1,MGA,TBX15,TBX4,TBX5,ZBTB7A,TBX18,ELF1,ELF3,ETV1,GABPA,TBX21,TBX3	TCF7L2,ELK4,NKX2-8,SPIC,TBX20,MEIS2,PKNOX2,TBX5,TBX18,ZNF135,ZNF460,ZKSCAN5,ETV1,MAFK,TCF7,ERF::FOXO1,ETV2::FOXI1,FLI1::FOXI1,FOXO1::ELK3,FOXO1::FLI1
chr1-25036116-25036676	chr1	25036116	25036676	100616365	MIR4425	24994313	25127967	25023503	12892	100616365	MIR4425	+	NK	Distal Intergenic	RREB1,RUNX3	ZBTB7C,RUNX2
chr1-25990644-25991187	chr1	25990644	25991187	5051	PAFAH2	25945551	26009020	25997621	6705	5051	PAFAH2	-	NK	5' UTR	RREB1,ETV1	ZBTB7C,PKNOX2,ETS2,NKX6-3,ZNF460,ZNF341,ETV1,PKNOX1,ERF::FOXO1,ETV2::FOXI1,ETV5::FOXI1,FLI1::FOXI1,FOXO1::ELK3,FOXO1::FLI1
chr1-27618222-27618757	chr1	27618222	27618757	2268	FGR	27614247	27653727	27624062	5572	2268	FGR	-	NK	Intron	ELK4,ZBTB7A,TBX18,ELF1,ELF3,ETV1,GABPA,RUNX3,TBX3	ELK4,NKX2-8,RUNX2,HNF4A,TBX18,ZNF135,ETV7,ETV1,TCF3,ETV5::DRGX
chr1-64882510-64883309	chr1	64882510	64883309	3716	JAK1	64872286	64978283	64966504	83594	3716	JAK1	-	NK	3' UTR	TBX20,TBX18,TBX21	TCF7L2,TBX20,TBX18,ZKSCAN5,ESRRA,SPIB,TCF7
chr1-67226498-67227115	chr1	67226498	67227115	400757	C1orf141	67225705	67269608	67231852	5045	400757	C1orf141	-	NK	Intron	RREB1,RUNX3	MEF2C,DRGX,GSX2,MAFK,PKNOX1,ERF::FOXO1,ETV2::FOXI1,ETV5::FOXI1,FLI1::FOXI1,FOXO1::ELK3,FOXO1::FLI1
chr1-100028704-100029233	chr1	100028704	100029233	64645	MFSD14A	100015850	100095813	100038097	-9128	64645	MFSD14A	+	NK	3' UTR	MEIS1,EOMES,MGA,TBX15,TBX1,TBX4,TBX5,ELF1,ELF3,ETV1,GABPA	TBX1,TBX5,ZKSCAN5,ZNF680,ETV1,SPIB,ERF::HOXB13,HOXD12::ELK1
chr1-100712641-100713524	chr1	100712641	100713524	7412	VCAM1	100680178	100807214	100719742	-6659	7412	VCAM1	+	NK	Distal Intergenic	RREB1,ELK4,ETV3,ZBTB7A,ELF1	ELK4,FOXL1,ETV3,ETV7,ATF2,ZKSCAN5,ELK1::HOXA1,CDX1
chr1-108080365-108080905	chr1	108080365	108080905	29957	SLC25A24	108078982	108222212	108192818	112182	29957	SLC25A24	-	NK	Distal Intergenic	RREB1,MEIS1,TBX1,ELF1,ELF3,GABPA	TBX1,ESRRA,TCF3
chr1-114342218-114342875	chr1	114342218	114342875	51592	TRIM33	114276765	114546394	114399609	57062	51592	TRIM33	-	NK	Distal Intergenic	ELF1,ELF3,ETV1,GABPA	TFAP2A,HNF4A,ETV1,SPIB,ERF::FOXO1,ETV5::DRGX,HOXD12::ELK1
chr1-159008653-159009277	chr1	159008653	159009277	3428	IFI16	158970973	159052884	159008995	-29	3428	IFI16	+	NK	Promoter	ELK4,ETV3,ZBTB7A,PLAGL2,ELF1,ELF3,ETV1,GABPA	ELK4,ETV2,ETV3,MEIS2,ETS2,ZNF136,ZNF680,ETV1,SPIB,ETV2::FOXI1,ETV5::FOXI1,FLI1::FOXI1,FOXO1::ELK3,CDX1
chr1-159800084-159800683	chr1	159800084	159800683	343413	FCRL6	159790758	159814587	159800511	-127	343413	FCRL6	+	NK	Promoter	TBR1,ELF1,ELF3,RUNX3	RUNX2,TBR1,ETV7,ZKSCAN5,ZNF341,ESRRA,SPIB
chr1-162411902-162412402	chr1	162411902	162412402	117157	SH2D1B	162396929	162454694	162412138	-13	117157	SH2D1B	-	NK	Promoter	ELF1,ELF3,ETV1,GABPA	FOS,FOSB::JUNB,ZKSCAN5,ETV1,SPIB
chr1-167446011-167446557	chr1	167446011	167446557	919	CD247	167411872	167532395	167439640	-6643	919	CD247	-	NK	Intron	TBX2	NKX2-8,HNF4A,ZNF135,TCF3
chr1-167483604-167484367	chr1	167483604	167484367	919	CD247	167411872	167532395	167518529	34543	919	CD247	-	NK	Intron	RREB1,ELK4,ETV3,ZBTB7A,ELF1,ELF3,ETV1,GABPA	TCF7L2,ELK4,ETV3,ETV1,SPIB,TCF3,ELK1::HOXA1,ERF::HOXB13,ETV2::FIGLA
chr1-167486253-167486820	chr1	167486253	167486820	919	CD247	167411872	167532395	167518529	31992	919	CD247	-	NK	Intron	ELF1,ELF3,ETV1,GABPA	ZNF135,ETV7,ATF2,ETV1,SPIB
chr1-167488740-167489961	chr1	167488740	167489961	919	CD247	167411872	167532395	167518529	29178	919	CD247	-	NK	Intron	RUNX3	MEF2C,TCF7L2,POU3F3,TFAP2A,HESX1,BCL6,ZKSCAN5,PKNOX1,SPIB,ERF::HOXB13,ETV2::FIGLA
chr1-171805319-171805857	chr1	171805319	171805857	51603	METTL13	171761956	171817946	171794394	11193	51603	METTL13	+	NK	Intron	RREB1,TBX2,TBX20,TBR1,TBX18,TBX21,TBX3	TBX20,TBR1,TBX18
chr1-180192075-180192577	chr1	180192075	180192577	5768	QSOX1	180124991	180213484	180196682	-4355	5768	QSOX1	+	NK	Intron	ELK4,ETV3,ELF1,ELF3,GABPA,TBX3	ELK4,ETV3,TFAP2A,HNF4A,ZNF460,ETV7,ZKSCAN5,TCF3,ETV5::DRGX
chr1-198788488-198789079	chr1	198788488	198789079	100131234	MIR181A1HG	198770004	198843099	198827216	38432	100131234	MIR181A1HG	-	NK	Intron	PLAGL2	HNF4A,ZNF16
chr1-235642001-235643143	chr1	235642001	235643143	2786	GNG4	235546721	235681577	235649993	7420	2786	GNG4	-	NK	Intron	RREB1,TBX2,TBX20,EOMES,MGA,TBR1,TBX15,TBX1,TBX4,TBX5,PLAGL2,TBX18,TBX3	FOS,TBX20,MEIS2,RUNX2,TBR1,TBX1,TBX5,FOSB::JUNB,TBX18,ZNF460,ZKSCAN5,TCF3,ETV2::FIGLA
chr2-8424504-8426054	chr2	8424504	8426054	339789	LINC00299	8301358	8452687	8328419	-96859	339789	LINC00299	-	NK	Intron	RREB1,EOMES,MGA,TBX15,ZBTB7A,ELF1,ELF3,ETV1,GABPA,TBX21	MEF2C,TCF7L2,NKX2-8,POU3F3,TFAP2B,NKX6-3,ZNF136,ETV7,ETV1,POU2F3,SPIB,TCF7,ERF::HOXB13,ETV2::FOXI1,ETV5::DRGX,ETV5::FOXI1,HOXD12::ELK1
chr2-8455559-8456536	chr2	8455559	8456536	101929567	LINC01814	8452688	8631318	8576955	120907	101929567	LINC01814	-	NK	Intron	RREB1	SPIC,ZNF136,ZNF460,ZNF16,ZNF680
chr2-12056904-12057976	chr2	12056904	12057976	100506457	MIR3681HG	11851436	12152857	12106584	-49143	100506457	MIR3681HG	+	NK	Intron	ELK4,TBX2,MEIS1,EOMES,ZBTB7A,PLAGL2,ELF1,ELF3,ETV1,GABPA,TBX21,TBX3	FOS,ELK4,FOXL1,MEIS2,TFAP2A,TFAP2B,TFAP2C,TP73,FOSB::JUNB,ETV7,ZNF16,ESRRA,ETV1,MAFK,SPIB,ETV2::FIGLA
chr2-12064139-12064641	chr2	12064139	12064641	100506457	MIR3681HG	11851436	12152857	12106584	-42193	100506457	MIR3681HG	+	NK	Intron	MEIS1,RUNX3	NKX2-8,ZKSCAN5,ZNF341,MAFK,TCF3,ERF::FOXO1
chr2-28410164-28411008	chr2	28410164	28411008	2355	FOSL2	28395092	28426328	28395511	15074	2355	FOSL2	+	NK	Intron	TBX2,MGA,TBX15,TBX1,TBX4,TBX5,TBX18,ELF1,ELF3	NKX2-8,TBX1,TBX5,TFAP2A,MYCN,HNF4A,TBX18,ZNF135,ZNF460,ZKSCAN5,SPIB,ETV2::FOXI1
chr2-44184032-44184568	chr2	44184032	44184568	5495	PPM1B	44081988	44246640	44168910	15389	5495	PPM1B	+	NK	Intron	ELF1,ELF3,ETV1,GABPA,RUNX3	NKX2-8,POU3F3,ETV7,ZKSCAN5,ZNF16,ZNF680,ESRRA,ETV1,SPIB,ERF::HOXB13,ETV5::DRGX,FOXO1::FLI1,HOXD12::ELK1
chr2-46369693-46370265	chr2	46369693	46370265	2034	EPAS1	46222385	46430600	46375636	-5656	2034	EPAS1	+	NK	Exon	RREB1,MGA,TBX15,ELF1,ELF3,GABPA	ETV7,ZKSCAN5,ESRRA,SPIB
chr2-54422107-54422744	chr2	54422107	54422744	6711	SPTBN1	54393637	54693283	54456285	-33859	6711	SPTBN1	+	NK	Distal Intergenic	ELF3,ETV1,GABPA	TP73,KLF3,ZNF135,ETV1,ERF::FOXO1,ETV2::FOXI1,ETV5::FOXI1,FLI1::FOXI1,FOXO1::ELK3,CDX1
chr2-54942166-54942857	chr2	54942166	54942857	400954	EML6	54693284	54988740	54948882	-6370	400954	EML6	+	NK	Intron	ELK4,TBX2,TBX20,MEIS1,EOMES,MGA,TBR1,TBX15,TBX1,TBX4,TBX5,ZBTB7A,TBX18,ELF1,ELF3,ETV1,GABPA,TBX21,TBX3	ELK4,TBX20,MEIS2,PKNOX2,TBR1,TBX1,TBX5,ETS2,KLF3,TBX18,ATF2,ETV1,ERF::FOXO1,ETV2::FOXI1,ETV5::FOXI1,FLI1::FOXI1,FOXO1::ELK3,HOXD12::ELK1
chr2-85694070-85694624	chr2	85694070	85694624	10578	GNLY	85676959	85723356	85694342	4	10578	GNLY	+	NK	Promoter	RREB1,TBX2,TBX20,EOMES,MGA,TBR1,TBX15,TBX18,TBX21,TBX3	FOS,TBX20,TBR1,FOSB::JUNB,KLF3,TBX18,ZNF460
chr2-97721081-97721662	chr2	97721081	97721662	7535	ZAP70	97705409	97748958	97724461	-3089	7535	ZAP70	+	NK	Intron		FOS,MEF2C,MEF2B,ZNF135,ZNF460,ATF2,TCF3
chr2-98634354-98635214	chr2	98634354	98635214	25972	UNC50	98608548	98639935	98616397	18386	25972	UNC50	+	NK	Intron	MEIS1,PLAGL2	MEIS2,ZNF16
chr2-103132488-103132988	chr2	103132488	103132988	130827	TMEM182	102749434	103597640	102762013	370724	130827	TMEM182	+	NK	Intron	ELF1,ELF3,ETV1,GABPA	RUNX2,ZNF680,ETV1,ETV2::FOXI1,ETV5::DRGX,FLI1::DRGX
chr2-110852406-110852925	chr2	110852406	110852925	55289	ACOXL	110705344	111055071	110805319	47345	55289	ACOXL	+	NK	Intron	ELK4,TBX20,ELF3,ETV1,GABPA,RUNX3	FOS,ELK4,NKX2-8,TBX20,ETV2,ETS2,ETV1,PKNOX1,ERF::FOXO1,ETV2::FOXI1,ETV5::FOXI1,FLI1::FOXI1,FOXO1::ELK3,FOXO1::FLI1
chr2-130795866-130796673	chr2	130795866	130796673	205147	AMER3	130742253	130796873	130756291	39977	205147	AMER3	+	NK	Distal Intergenic	ELK4,TBX1,ZBTB7A,ELF1,ELF3,ETV1,GABPA	TCF7L2,ELK4,TBX1,TFAP2A,TFAP2B,TFAP2C,ZNF460,ETV7,ZNF16,ETV1,TCF3,ERF::FOXO1,ETV2::FOXI1,ETV5::FOXI1,FLI1::FOXI1,FOXO1::ELK3,FOXO1::FLI1
chr2-136242615-136243223	chr2	136242615	136243223	7852	CXCR4	136058337	136441855	136118165	-124753	7852	CXCR4	-	NK	Distal Intergenic	TBX18,GABPA	FOS,FOSB::JUNB,TBX18,MAFK,ETV2::FOXI1,ETV5::FOXI1,FLI1::FOXI1,FOXO1::FLI1
chr2-159145124-159145705	chr2	159145124	159145705	85461	TANC1	158886467	159167187	159147540	-2125	85461	TANC1	+	NK	Intron	TBX2,ELF1,ELF3,RUNX3	NKX2-8,RUNX2,TEF,ZKSCAN5,HLF,NFIL3,SPIB,ERF::FOXO1
chr2-191126280-191126797	chr2	191126280	191126797	6775	STAT4	191027284	191198390	191150971	24432	6775	STAT4	-	NK	Intron	ELF1,ELF3,GABPA	ZBTB7C,PKNOX2,ZNF16,ZNF680,SPIB
chr2-191152770-191153289	chr2	191152770	191153289	6775	STAT4	191027284	191198390	191151596	-1432	6775	STAT4	-	NK	Distal Intergenic	ELK4,ZBTB7A,ELF1,ELF3,ETV1,GABPA	ELK4,ETV7,ZKSCAN5,ETV1,SPIB,CUX1
chr2-191206411-191207248	chr2	191206411	191207248	4430	MYO1B	191198391	191544566	191245185	-38355	4430	MYO1B	+	NK	Distal Intergenic	RREB1,ELK4,ETV3,MEIS1,ZBTB7A,TBX18,ELF1,ELF3,ETV1,GABPA	ELK4,NKX2-8,SPIC,ETV3,ETS2,HOXA1,TBX18,ETV7,ZKSCAN5,ETV1,PKNOX1,SPIB
chr2-191355276-191355776	chr2	191355276	191355776	4430	MYO1B	191198391	191544566	191369564	-14037	4430	MYO1B	+	NK	Intron	RREB1,ELK4,MGA,TBX15,ZBTB7A,ELF1,ELF3,ETV1,GABPA	ELK4,ETV7,ETV1,PKNOX1,SPIB
chr2-224523276-224524648	chr2	224523276	224524648	8452	CUL3	224441105	224686257	224533094	9131	8452	CUL3	-	NK	Intron	RREB1,ELF1,ELF3,ETV1,GABPA	TCF7L2,FOXL1,NKX2-8,VENTX,TP73,BCL6,ATF2,ZNF16,ETV1,SPIB,FOXO1::FLI1
chr2-225030239-225030769	chr2	225030239	225030769	55619	DOCK10	225026463	225221546	225042384	11879	55619	DOCK10	-	NK	Intron	RREB1,EOMES,MGA,TBR1,TBX15,TBX1,TBX4,TBX5,RUNX3,TBX3	TFEB,TBR1,TBX1,TBX5,ZNF136,TCF3
chr2-230974120-230974658	chr2	230974120	230974658	9290	GPR55	230899229	230978593	230961066	-13322	9290	GPR55	-	NK	Distal Intergenic	ELK4,ETV3,ZBTB7A,ELF1,ELF3,ETV1,GABPA,RUNX3	FOS,MEF2C,ELK4,NKX2-8,ETV2,ETV3,POU3F3,DRGX,ETS2,ZNF135,ZNF460,GSX2,ETV7,ESRRA,ETV1,SPIB,ERF::FOXO1,ERF::HOXB13,ETV2::FOXI1,ETV5::DRGX,ETV5::FOXI1,FLI1::DRGX,FLI1::FOXI1,FOXO1::ELK3,FOXO1::FLI1,HOXD12::ELK1
chr2-231362149-231362677	chr2	231362149	231362677	100616317	MIR4777	231328265	231366641	231362708	-294	100616317	MIR4777	+	NK	Intron	ELK4,ETV3,ZBTB7A,PLAGL2,ELF1,ELF3,ETV1,GABPA	ELK4,ETV2,ETV3,ETS2,ETV1,PKNOX1,ERF::FOXO1,ETV2::FOXI1,ETV5::DRGX,FLI1::FOXI1
chr2-231391873-231392457	chr2	231391873	231392457	93010	B3GNT7	231383059	231427293	231395543	-3377	93010	B3GNT7	+	NK	Intron	PLAGL2	TFAP2A,TFAP2B,TFAP2C,ESRRA,MAFK,TCF3,ETV2::FIGLA,FLI1::DRGX
chr2-231528232-231528732	chr2	231528232	231528732	10316	NMUR1	231522418	231561698	231530495	2012	10316	NMUR1	-	NK	Exon	ZBTB7A,PLAGL2,ELF1,ELF3,GABPA	HES6,ETV7
chr3-12915986-12916618	chr3	12915986	12916618	9922	IQSEC1	12904525	13207129	12967460	51157	9922	IQSEC1	-	NK	Intron	RREB1,RUNX3	RUNX2,KLF3,ZNF460,ZNF341
chr3-13040247-13040773	chr3	13040247	13040773	9922	IQSEC1	12904525	13207129	13073117	32606	9922	IQSEC1	-	NK	Intron	TBX1,PLAGL2	TBX1,MYCN,ZNF16
chr3-13069432-13069978	chr3	13069432	13069978	9922	IQSEC1	12904525	13207129	13073117	3411	9922	IQSEC1	-	NK	Intron	RREB1,ELK4,ETV3,MGA,TBX15,TBX1,TBX4,TBX5,ZBTB7A,PLAGL2,ELF1,ELF3,ETV1,GABPA	ELK4,ETV3,TBX1,TBX5,TP73,ETS2,ZNF460,ATF2,ZKSCAN5,ETV1,SPIB,ETV2::FOXI1,ETV5::FOXI1,FLI1::FOXI1,FOXO1::ELK3,FOXO1::FLI1
chr3-13621588-13622154	chr3	13621588	13622154	2199	FBLN2	13522979	13643570	13613898	7972	2199	FBLN2	+	NK	Exon	ELK4,ETV3,TBX1,ZBTB7A,ELF1,ELF3,ETV1,GABPA	ELK4,ETV3,TBX1,ETS2,HES6,ZNF460,ETV1,ETV2::FOXI1
chr3-16338159-16338699	chr3	16338159	16338699	23180	RFTN1	16296167	16525173	16326867	-11561	23180	RFTN1	-	NK	Intron	ELF1,ETV1,GABPA	TCF7L2,ETV1,TCF3,TCF7
chr3-24699001-24699501	chr3	24699001	24699501	5915	RARB	24604678	25537125	24687919	11331	5915	RARB	+	NK	Intron	EOMES,TBR1,TBX1,TBX18,TBX3	FOXL1,TBR1,TBX1,TBX18
chr3-25460737-25461249	chr3	25460737	25461249	5915	RARB	24604678	25537125	25458310	2682	5915	RARB	+	NK	Promoter	ELF1,ELF3,ETV1,GABPA	FOS,MEIS2,PKNOX2,ETV7,ZKSCAN5,ESRRA,ETV1,SPIB
chr3-36842905-36843516	chr3	36842905	36843516	9881	TRANK1	36795257	36969112	36850651	7440	9881	TRANK1	-	NK	Intron	TBX2,TBX18,RUNX3	NKX2-8,MYCN,HNF4A,TBX18
chr3-125119621-125120224	chr3	125119621	125120224	84561	SLC12A8	125081768	125151383	125119144	-777	84561	SLC12A8	-	NK	Promoter	TBX2,TBX20,EOMES,MGA,TBR1,TBX15,TBX1,TBX4,TBX5,TBX18,ELF1,ELF3,ETV1,GABPA,TBX21,TBX3	MEF2C,TBX20,TBR1,TBX1,TBX5,TFAP2A,TBX18,ETV1,SPIB
chr3-143235529-143236029	chr3	143235529	143236029	9435	CHST2	143078106	143408740	143119331	116447	9435	CHST2	+	NK	Distal Intergenic	TBX2,TBX20,EOMES,MGA,TBR1,TBX15,TBX18,TBX21,TBX3	TBX20,TBR1,TBX18
chr3-143280923-143281423	chr3	143280923	143281423	9435	CHST2	143078106	143408740	143119331	161841	9435	CHST2	+	NK	Intron	ETV1	FOXL1,ETV1,ETV2::FIGLA,ETV2::FOXI1,FLI1::FOXI1,FOXO1::FLI1
chr3-143301410-143301963	chr3	143301410	143301963	9435	CHST2	143078106	143408740	143119331	182354	9435	CHST2	+	NK	Intron	EOMES,TBX1,TBX21	TCF7L2,POU3F3,TBX1,ZNF680,TCF7
chr3-188568682-188569250	chr3	188568682	188569250	4026	LPP	188193371	188649001	188569031	-64	4026	LPP	+	NK	Promoter	RREB1	ATF2,ZNF16,ZNF341,MAFK
chr4-2570757-2571302	chr4	2570757	2571302	8603	FAM193A	2568870	2720568	2625261	-54231	8603	FAM193A	+	NK	Intron	RREB1,ELF1,ELF3,GABPA	MEIS2,HESX1,ETV7,ZNF341,SPIB,CDX1
chr4-2814516-2815079	chr4	2814516	2815079	6452	SH3BP2	2774700	2836827	2812304	2492	6452	SH3BP2	+	NK	5' UTR	TBX4,TBX5,PLAGL2,TBX18	TBX5,TP73,TBX18,ZNF460,ZKSCAN5,POU2F3,SPIB
chr4-36189714-36190334	chr4	36189714	36190334	116984	ARAP2	34212437	36263065	36210745	20720	116984	ARAP2	-	NK	Intron	RREB1,RUNX3	ZNF460,ATF2,ZKSCAN5,SPIB,ETV5::DRGX
chr4-38677374-38677909	chr4	38677374	38677909	51274	KLF3	38593689	38720270	38664344	13296	51274	KLF3	+	NK	Intron	RREB1,ELK4,ZBTB7A,ETV1,GABPA	ELK4,ETV1,ETV2::FOXI1,FLI1::FOXI1,HOXD12::ELK1
chr4-40265124-40266097	chr4	40265124	40266097	101060498	LINC02265	40258416	40325907	40316485	-50874	101060498	LINC02265	+	NK	Exon	RUNX3	FOS,RUNX2,TFAP2A,TFAP2B,TFAP2C,ZKSCAN5,ZNF341,MAFK,PKNOX1,SPIB,TCF3,HOXD12::ELK1
chr4-48114367-48114867	chr4	48114367	48114867	7294	TXK	48052597	48137969	48114545	-71	7294	TXK	-	NK	Promoter		PKNOX1,SPIB
chr4-68265994-68266494	chr4	68265994	68266494	132724	TMPRSS11B	68179780	68282220	68245720	-20523	132724	TMPRSS11B	-	NK	Distal Intergenic	RREB1,TBR1,TBX1,TBX18,RUNX3,TBX3	TBR1,TBX1,TBX18,CUX1
chr4-114004446-114005029	chr4	114004446	114005029	79642	ARSJ	113870788	114289091	113979727	-25009	79642	ARSJ	-	NK	Distal Intergenic	ZBTB7A	TCF7L2,ZNF16,TCF7,ELK1::HOXA1,CDX1
chr5-80755589-80756626	chr5	80755589	80756626	4437	MSH3	80655068	80837938	80715205	40901	4437	MSH3	+	NK	Intron	RREB1,TBX18,ELF3,TBX21	MEF2C,TBX18,ZNF136,BCL6,ZKSCAN5,SPIB,ELK1::HOXA1,FLI1::FOXI1
chr5-111584588-111585088	chr5	111584588	111585088	134429	STARD4	111497480	111634420	111512590	-72247	134429	STARD4	-	NK	Intron	ZBTB7A,TBX18,ELF1,ELF3,ETV1,GABPA	TBX18,ATF2,ZKSCAN5,ZNF680,ESRRA,ETV1,MAFK,PKNOX1,ERF::HOXB13,HOXD12::ELK1
chr5-138458918-138459763	chr5	138458918	138459763	1958	EGR1	138455245	138491565	138465490	-6149	1958	EGR1	+	NK	Distal Intergenic	RREB1,ELK4,TBX1,ZBTB7A,ELF1,ELF3,ETV1,GABPA,TBX21	ELK4,PKNOX2,TBX1,TFAP2A,TFAP2B,TFAP2C,MYCN,HES6,ZNF460,ZKSCAN5,ETV1,MAFK,SPIB
chr5-138565115-138565828	chr5	138565115	138565828	3313	HSPA9	138550596	138593205	138566711	1239	3313	HSPA9	-	NK	Intron	ELK4,ETV3,TBX4,TBX5,RUNX3	ELK4,SHOX,ISX,NKX2-8,LBX2,ETV2,ETV3,TBX5,ETS2,ZNF135,ZNF460,PKNOX1,ERF::FOXO1,ETV5::FOXI1
chr5-139925817-139926342	chr5	139925817	139926342	9542	NRG2	139833813	140074890	139904397	-21681	9542	NRG2	-	NK	Intron	TBX2,ELF1,ETV1,GABPA	FOS,PKNOX2,FOSB::JUNB,ZKSCAN5,ZNF341,ETV1,TCF3
chr5-170277670-170279376	chr5	170277670	170279376	3937	LCP2	170244479	170314828	170267327	-11195	3937	LCP2	-	NK	Intron	RREB1,MEIS1,PLAGL2,ETV1	FOS,SPIC,ZBTB7C,MEIS2,RUNX2,TFAP2A,FOSB::JUNB,KLF3,ZNF460,ZKSCAN5,ZNF16,ETV1,SPIB,ETV2::FIGLA
chr6-111793710-111794290	chr6	111793710	111794290	2534	FYN	111641412	111963762	111793912	-87	2534	FYN	-	NK	Promoter	ELK4,ETV3,ZBTB7A,PLAGL2,ELF1,ELF3,ETV1,GABPA	ELK4,ETV3,ETS2,ZNF135,ZKSCAN5,ETV1,POU2F3,SPIB,ETV2::FOXI1,FOXO1::FLI1
chr6-131524622-131525165	chr6	131524622	131525165	383	ARG1	131411788	131584309	131573144	-48250	383	ARG1	+	NK	Intron	RREB1,ETV3,MEIS1,TBR1,ELF1,ELF3,ETV1,GABPA,TBX3	ISX,LBX2,VENTX,ETV3,TBR1,HESX1,ETS2,ZNF680,ETV1,ERF::FOXO1,ETV2::FOXI1,ETV5::FOXI1,FLI1::FOXI1,FOXO1::FLI1,MSX1
chr6-161226192-161226882	chr6	161226192	161226882	56895	AGPAT4	161197110	161421740	161232236	5698	56895	AGPAT4	-	NK	Intron	TBX2,EOMES,TBR1	MEIS2,TBR1,ZKSCAN5,ZNF16,ESRRA,FOXO1::FLI1
chr6-166244233-166244809	chr6	166244233	166244809	285800	PRR18	166238542	166316535	166308383	63861	285800	PRR18	-	NK	Intron	TBX2,TBX20,EOMES,MGA,TBR1,TBX15,TBX1,TBX4,TBX5,TBX18,TBX21,TBX3	TCF7L2,SPIC,TBX20,MEIS2,TBR1,TBX1,TBX5,TBX18,ESRRA,PKNOX1,ERF::FOXO1,ERF::HOXB13,HOXD12::ELK1
chr6-170087864-170088915	chr6	170087864	170088915	401289	LINC01624	170035650	170283706	170272474	-184084	401289	LINC01624	+	NK	Exon	RREB1,MGA,TBX15,PLAGL2,ELF1,ETV1,GABPA	HES6,HNF4A,ZNF460,ETV1,TCF3,ERF::FOXO1
chr6-170147385-170148630	chr6	170147385	170148630	401289	LINC01624	170035650	170283706	170272474	-124466	401289	LINC01624	+	NK	Promoter	ELK4,TBX2,EOMES,MGA,TBR1,TBX15,TBX1,TBX4,TBX5,ZBTB7A,PLAGL2,TBX18,ETV1,GABPA,TBX21,TBX3	ELK4,TBR1,TBX1,TBX5,ETS2,HES6,TBX18,ZNF135,ZNF460,ZNF16,ZNF341,ESRRA,ETV1,MAFK,TCF3,ERF::FOXO1,FLI1::FOXI1
chr6-170444066-170444670	chr6	170444066	170444670	84498	FAM120B	170367471	170477310	170404179	40188	84498	FAM120B	+	NK	Distal Intergenic	TBX2,MEIS1,TBR1,TBX4,TBX5,TBX21,TBX3	MEIS2,PKNOX2,TBR1,TBX5,HES6,ZNF460,ZNF341,TCF3,ETV2::FIGLA
chr6-170459380-170459942	chr6	170459380	170459942	84498	FAM120B	170367471	170477310	170404179	55481	84498	FAM120B	+	NK	Distal Intergenic	RREB1	FOS,ZNF135,ZNF460,ZNF341,MAFK,SPIB,FOXO1::FLI1
chr7-2698827-2699600	chr7	2698827	2699600	155185	AMZ1	2667808	2724327	2688202	11010	155185	AMZ1	+	NK	Intron	RREB1,EOMES,TBR1,TBX18,TBX21,TBX3	FOS,TCF7L2,PKNOX2,RUNX2,TBR1,ETS2,TBX18,ZNF341,MAFK,TCF3,ETV2::FIGLA,ETV2::FOXI1,FLI1::FOXI1
chr7-3107336-3107836	chr7	3107336	3107836	84433	CARD11	2883683	3172696	3043945	-63640	84433	CARD11	-	NK	Intron	TBX2,EOMES,TBR1,TBX18,TBX21,TBX3	TBR1,KLF3,TBX18,CDX1
chr7-27899523-27900059	chr7	27899523	27900059	221895	JAZF1	27845941	28126003	27864080	-35710	221895	JAZF1	-	NK	Intron	TBX20,MGA,TBX15,TBX1,TBX4,TBX5,TBX18,RUNX3,TBX3	TBX20,MEIS2,TBX1,TBX5,TBX18,ZNF135,ZNF460,ATF2
chr7-38280652-38281152	chr7	38280652	38281152	445347	TARP	38222037	38329198	38265678	-15223	445347	TARP	-	NK	Distal Intergenic	RREB1	SPIC,TCF3
chr7-38316794-38317921	chr7	38316794	38317921	445347	TARP	38222037	38329198	38265678	-51678	445347	TARP	-	NK	5' UTR	RREB1,ETV3,MEIS1,PLAGL2,GABPA,RUNX3	FOXL1,SPIC,ETV3,MEIS2,ZNF136,POU2F3,ETV2::FOXI1,FLI1::FOXI1,FOXO1::ELK3
chr7-38330766-38331321	chr7	38330766	38331321	273	AMPH	38329199	38679376	38392719	61675	273	AMPH	-	NK	Promoter	TBX20,MGA,TBX15,ELF1,ELF3,ETV1,GABPA,TBX21,TBX3	SPIC,TBX20,ZKSCAN5,ETV1,SPIB
chr7-72941949-72942449	chr7	72941949	72942449	9883	POM121	72853782	72946037	72925122	17076	9883	POM121	+	NK	Exon	ETV1,GABPA	ZBTB7C,TFAP2A,TFAP2B,TFAP2C,ETS2,ZNF135,ETV1,TCF3,ETV2::FOXI1,ETV5::FOXI1,FLI1::FOXI1,FOXO1::ELK3,FOXO1::FLI1
chr7-77561283-77561783	chr7	77561283	77561783	5782	PTPN12	77476838	77666612	77571091	-9557	5782	PTPN12	+	NK	Intron	TBX2,TBX20,EOMES,TBR1,TBX1,ZBTB7A,TBX18,ELF1,ELF3,ETV1,GABPA,TBX21,TBX3	TBX20,POU3F3,TBR1,TBX1,TBX18,ETV7,ETV1,CDX1
chr7-92664123-92664836	chr7	92664123	92664836	1021	CDK6	92604336	92977278	92618277	-46201	1021	CDK6	-	NK	Intron	ELF1,ELF3,ETV1,GABPA	SPIC,HES6,KLF3,BCL6,ZNF680,ETV1,PKNOX1,SPIB,ERF::FOXO1,FOXO1::FLI1
chr7-105848765-105849265	chr7	105848765	105849265	222255	ATXN7L1	105612571	105876712	105876477	27461	222255	ATXN7L1	-	NK	Intron	TBX2,TBX20,EOMES,MGA,TBR1,TBX15,TBX1,TBX4,TBX5,PLAGL2,TBX18,TBX21,TBX3	MEF2C,MEF2B,TBX20,TBR1,TBX1,TBX5,TBX18,ZNF460,ZKSCAN5,TCF3
chr7-129535829-129536352	chr7	129535829	129536352	100287482	SMKR1	129480361	129557253	129502792	33297	100287482	SMKR1	+	NK	Distal Intergenic	RREB1,ELF1,ELF3,ETV1,GABPA	MEF2C,ESRRA,ETV1,ERF::HOXB13
chr7-132453784-132454490	chr7	132453784	132454490	91584	PLXNA4	131851863	132648741	132576470	122332	91584	PLXNA4	-	NK	Intron	MEIS1,RUNX3	TFEB,MEIS2,RUNX2,MYCN,KLF3,ZNF135,ZNF460,ZNF341,PKNOX1,ERF::FOXO1,ETV5::DRGX,FLI1::DRGX,FOXO1::ELK3,FOXO1::FLI1
chr7-135901480-135901980	chr7	135901480	135901980	767558	LUZP6	135863082	136423011	135977316	75585	767558	LUZP6	-	NK	Intron	TBX2,EOMES,TBR1,TBX4,TBX5,TBX18,TBX21,TBX3	TBR1,TBX5,TBX18,ZNF460
chr7-139647001-139647578	chr7	139647001	139647578	28996	HIPK2	139628084	139747032	139717013	69723	28996	HIPK2	-	NK	Intron		SPIC,RUNX2,BCL6,ZKSCAN5,ZNF680,SPIB,ERF::FOXO1,ETV2::FOXI1,ETV5::FOXI1,FOXO1::ELK3
chr7-139820037-139820579	chr7	139820037	139820579	6916	TBXAS1	139777958	139992449	139829153	-8844	6916	TBXAS1	+	NK	Intron	ELK4,ZBTB7A,ELF1,ELF3,ETV1,GABPA	ELK4,TFAP2A,TFAP2B,TFAP2C,ZNF135,ZKSCAN5,ETV1
chr7-139886061-139886578	chr7	139886061	139886578	6916	TBXAS1	139777958	139992449	139829302	57016	6916	TBXAS1	+	NK	Intron	RREB1	TP73,ERF::HOXB13
chr7-140714542-140715042	chr7	140714542	140715042	4708	NDUFB2	140684967	140728367	140702523	12268	4708	NDUFB2	+	NK	Intron	MEIS1,MGA,TBX15,TBX1,TBX4,TBX5,TBX18,ELF3,TBX3	TBX1,TBX5,HNF4A,TBX18,ZNF460,ETV7,ZNF341
chr7-142784089-142786888	chr7	142784089	142786888	5645	PRSS2	142755755	142813610	142772159	13328	5645	PRSS2	+	NK	Exon	ELK4,TBX20,ETV3,EOMES,TBR1,PLAGL2,TBX18	MEF2C,ELK4,SPIC,TBX20,ZBTB7C,ETV2,ETV3,PKNOX2,POU3F3,TBR1,TFAP2A,TFAP2B,TFAP2C,TP73,MYCN,ETS2,KLF3,TBX18,ZNF135,ZNF460,BCL6,ETV7,ATF2,ZKSCAN5,ZNF16,ZNF680,ESRRA,HLF,NFIL3,PKNOX1,SPIB,TCF3,ELK1::HOXA1,FOXO1::ELK3,FOXO1::FLI1
chr7-148773239-148773798	chr7	148773239	148773798	2146	EZH2	148770912	148923818	148811823	38304	2146	EZH2	-	NK	Intron	ELK4,ELF1,ELF3,ETV1,GABPA	ELK4,RUNX2,ETS2,NKX6-3,ETV1,ERF::HOXB13,ETV2::FOXI1,FLI1::DRGX,HOXD12::ELK1
chr8-22443616-22444798	chr8	22443616	22444798	5533	PPP3CC	22427974	22527947	22441365	2841	5533	PPP3CC	+	NK	Intron	ELK4,MEIS1,MGA,TBX15,TBX1,TBX4,TBX5,TBX18,ELF1,ELF3,ETV1,GABPA,TBX3	MEF2C,ELK4,TFEB,VENTX,ETV2,MEIS2,PKNOX2,TBX1,TBX5,DRGX,HNF4A,KLF3,TBX18,ZNF135,ZNF460,GSX2,ZNF680,ETV1,MAFK,SPIB,ERF::FOXO1,ETV2::FOXI1,ETV5::FOXI1,FLI1::FOXI1,FOXO1::FLI1
chr8-55934755-55935263	chr8	55934755	55935263	4067	LYN	55834956	56014726	55940234	-5224	4067	LYN	+	NK	Intron	TBX4,TBX5,TBX18	PKNOX2,TBX5,HNF4A,TBX18,ZKSCAN5,ETV2::FIGLA,MSX1
chr8-65837363-65838121	chr8	65837363	65838121	5150	PDE7A	65718024	65931941	65838748	1005	5150	PDE7A	-	NK	Intron	TBX20,EOMES,TBX1	FOXL1,TBX20,TBX1,FOXO1::FLI1
chr9-21883639-21884139	chr9	21883639	21884139	4507	MTAP	21681107	21913126	21859323	24565	4507	MTAP	+	NK	Intron	ELK4,ETV3,ZBTB7A,ELF1,ELF3,ETV1,GABPA	ELK4,ZBTB7C,ETV3,POU3F3,ETS2,ESRRA,ETV1,SPIB
chr9-33748869-33749406	chr9	33748869	33749406	5646	PRSS3	33744442	33806568	33750466	-1328	5646	PRSS3	+	NK	Distal Intergenic
chr9-71774768-71775464	chr9	71774768	71775464	23670	TMEM2	71567167	71863716	71768884	-6231	23670	TMEM2	-	NK	Intron	MEIS1,EOMES,TBX1,TBX18,TBX21	MEF2C,ETV2,MEIS2,TBX1,FOSB::JUNB,KLF3,TBX18,ZNF135,ZNF460,ZNF680,TCF3,ETV2::FIGLA,ETV5::DRGX
chr9-75152318-75152910	chr9	75152318	75152910	26578	OSTF1	75088381	75489593	75088543	64070	26578	OSTF1	+	NK	Distal Intergenic	RREB1	MEF2C,NKX2-8,ZBTB7C,KLF3,ESRRA
chr9-78237986-78238863	chr9	78237986	78238863	84131	CEP78	78133761	78280596	78236351	2072	84131	CEP78	+	NK	Intron	RREB1,GABPA	NKX2-8,HES6,KLF3,ZNF135,ZNF460,MAFK,PKNOX1,SPIB,ERF::HOXB13,ETV5::DRGX,FLI1::DRGX
chr9-79695701-79696248	chr9	79695701	79696248	7091	TLE4	78934459	79841808	79704645	-8670	7091	TLE4	+	NK	Intron	RREB1,TBX1,TBX4,TBX5,RUNX3	TCF7L2,PKNOX2,POU3F3,RUNX2,TBX1,TBX5,ZNF136,POU2F3,TCF3
chr9-89501910-89502724	chr9	89501910	89502724	10507	SEMA4D	89360589	89551571	89498130	-4186	10507	SEMA4D	-	NK	Distal Intergenic	RREB1,MEIS1,ELF1,ELF3,GABPA	PKNOX2,ETV7,ZKSCAN5,ESRRA,SPIB,ETV2::FOXI1,FLI1::FOXI1
chr9-113517050-113517609	chr9	113517050	113517609	5998	RGS3	113427737	113735877	113517270	58	5998	RGS3	+	NK	Promoter	RREB1,MEIS1,ELF1,ELF3,ETV1,GABPA	NKX2-8,MEIS2,ETS2,ZNF460,ETV1,ERF::FOXO1,ETV2::FIGLA,ETV2::FOXI1,ETV5::FOXI1,FLI1::FOXI1,FOXO1::FLI1
chr10-7243030-7243554	chr10	7243030	7243554	57713	SFMBT2	7094172	7490943	7408745	165452	57713	SFMBT2	-	NK	Intron	MGA,TBX15,TBX1,TBX4,TBX5	TBX1,TBX5,ZNF460,ZKSCAN5,TCF3,ERF::HOXB13
chr10-22505969-22506736	chr10	22505969	22506736	5305	PIP4K2A	22465721	22821289	22539635	33282	5305	PIP4K2A	-	NK	Distal Intergenic	TBR1,TBX18,ELF3,TBX21,TBX3	SPIC,TBR1,TBX18,ETV7,ZKSCAN5,ZNF680,SPIB
chr10-22573578-22574118	chr10	22573578	22574118	5305	PIP4K2A	22465721	22821289	22591675	17826	5305	PIP4K2A	-	NK	Intron		TCF7L2,SPIC,ATF2,MAFK
chr10-22597061-22597597	chr10	22597061	22597597	5305	PIP4K2A	22465721	22821289	22591713	-5615	5305	PIP4K2A	-	NK	Intron	ELK4,ELF1,ETV1,GABPA	TCF7L2,ELK4,ETV2,ETV1,FOXO1::FLI1
chr10-43162531-43163034	chr10	43162531	43163034	55454	CSGALNACT2	43121610	43170584	43138486	24295	55454	CSGALNACT2	+	NK	Intron	RREB1,ETV1,GABPA	ETV1,ETV2::FIGLA,ETV2::FOXI1,FLI1::FOXI1
chr10-70601663-70603142	chr10	70601663	70603142	5551	PRF1	70540791	70637789	70602759	356	5551	PRF1	-	NK	Promoter	RREB1,ELK4,TBX2,EOMES,MGA,TBR1,TBX15,TBX1,TBX4,TBX5,ZBTB7A,PLAGL2,TBX18,ELF1,ELF3,ETV1,GABPA,TBX21,TBX3	TCF7L2,ELK4,MEF2B,SPIC,TBR1,TBX1,TBX5,TFAP2A,TFAP2B,TFAP2C,KLF3,TBX18,ZNF135,ZNF460,ETV7,ZKSCAN5,ZNF16,ETV1,MAFK,SPIB
chr10-70603305-70603871	chr10	70603305	70603871	5551	PRF1	70540791	70637789	70602775	-812	5551	PRF1	-	NK	Intron	ELK4,TBX1,ZBTB7A,ELF1,ELF3,ETV1,GABPA	FOS,ELK4,TBX1,TP73,ETV7,ATF2,ETV1,SPIB
chr10-72326531-72327435	chr10	72326531	72327435	54788	DNAJB12	72305443	72431927	72336865	9881	54788	DNAJB12	-	NK	Distal Intergenic	MEIS1,TBX4,TBX5,ELF3,GABPA	MEIS2,TBX5,KLF3,ZNF135,ZNF460,ERF::FOXO1,ETV2::FOXI1,ETV5::FOXI1,FLI1::FOXI1,FOXO1::ELK3
chr10-96670699-96671221	chr10	96670699	96671221	118788	PIK3AP1	96603121	96774639	96669611	-1348	118788	PIK3AP1	-	NK	Intron	RUNX3	FOXL1,MEF2B,BCL6,FLI1::FOXI1
chr10-122422182-122422741	chr10	122422182	122422741	100500866	MIR3941	122414369	122435809	122416965	5495	100500866	MIR3941	+	NK	Exon	MEIS1,ETV1	MEIS2,ETS2,ESRRA,ETV1,ERF::FOXO1,MSX1
chr11-114073739-114074364	chr11	114073739	114074364	7704	ZBTB16	114020315	114252310	114064412	9638	7704	ZBTB16	+	NK	Intron	RREB1,ELK4,ZBTB7A,ELF1,ELF3,ETV1,GABPA	ELK4,NKX2-8,POU3F3,ZNF460,ETV7,ATF2,ETV1,ETV2::FIGLA,ETV2::FOXI1,ETV5::FOXI1,FLI1::FOXI1,FOXO1::ELK3
chr11-117969352-117969852	chr11	117969352	117969852	3587	IL10RA	117957904	118035985	117986348	-16745	3587	IL10RA	+	NK	Distal Intergenic	RREB1,TBX2,TBX20,MGA,TBX15,TBX1,TBX4,TBX5,TBX18,TBX21,TBX3	TBX20,TBX1,TBX5,TBX18,ZNF460,TCF3
chr12-10249558-10250067	chr12	10249558	10250067	3824	KLRD1	10219844	10347838	10226066	23745	3824	KLRD1	+	NK	Intron	TBX20,EOMES,TBR1,ELF1,ETV1,GABPA,RUNX3	SPIC,TBX20,RUNX2,TBR1,ZNF460,ZNF680,ETV1,ETV5::DRGX,FLI1::DRGX,HOXD12::ELK1
chr12-25518506-25519006	chr12	25518506	25519006	160492	LMNTD1	25385449	25803082	25519961	1204	160492	LMNTD1	-	NK	Exon	TBX2,TBX20,TBR1,ELF3	TBX20,TBR1,TP73,FOSB::JUNB,ZNF341,TCF7
chr12-39372679-39373383	chr12	39372679	39373383	55605	KIF21A	39110129	39531570	39367927	-5103	55605	KIF21A	-	NK	Intron	RREB1,ELK4,ZBTB7A,ELF1,ELF3,ETV1,GABPA,RUNX3	MEF2C,ELK4,SPIC,ETV2,FOSB::JUNB,ETS2,ETV7,ETV1,SPIB,ETV2::FOXI1,FLI1::FOXI1,FOXO1::ELK3,FOXO1::FLI1
chr12-46469903-46470429	chr12	46469903	46470429	54407	SLC38A2	46316247	46571085	46372867	-97298	54407	SLC38A2	-	NK	Exon	TBX2,ELF1,ETV1,GABPA,RUNX3	TFEB,ZNF460,ATF2,ESRRA,ETV1,FLI1::DRGX
chr12-57222968-57223523	chr12	57222968	57223523	11247	NXPH4	57210207	57224598	57219869	3375	11247	NXPH4	+	NK	Intron	RREB1,TBX4,TBX5	MEIS2,TBX5,TP73
chr12-57479321-57480212	chr12	57479321	57480212	64333	ARHGAP9	57470155	57483580	57479846	79	64333	ARHGAP9	-	NK	Promoter	PLAGL2,ETV1,GABPA	ETV2,PKNOX2,ETV7,ZKSCAN5,ETV1,HLF,NFIL3,SPIB,ERF::FOXO1,ETV2::FOXI1,ETV5::DRGX,ETV5::FOXI1,FLI1::FOXI1
chr12-64657803-64658380	chr12	64657803	64658380	693129	MIR548C	64616516	64675831	64622509	35581	693129	MIR548C	+	NK	Intron	TBX2,TBX20,MGA,TBR1,TBX15,TBX1,TBX4,TBX5,ZBTB7A,TBX18,ELF1,ELF3,ETV1,GABPA,RUNX3,TBX21,TBX3	TCF7L2,TBX20,TBR1,TBX1,TBX5,MYCN,HES6,TBX18,ZNF135,ZNF460,ETV1,MAFK,PKNOX1
chr12-93853976-93854476	chr12	93853976	93854476	8738	CRADD	93624756	93998691	93848660	5565	8738	CRADD	+	NK	Intron	RREB1	ESRRA,MAFK
chr12-123742075-123742597	chr12	123742075	123742597	23545	ATP6V0A2	123703680	123759257	123738959	3376	23545	ATP6V0A2	+	NK	3' UTR	ELF1,GABPA,RUNX3	ZBTB7C,RUNX2,ZNF460,ETV5::DRGX,FLI1::DRGX
chr13-21365361-21366084	chr13	21365361	21366084	253832	ZDHHC20	21365089	21478011	21381455	15732	253832	ZDHHC20	-	NK	Intron	RREB1,TBX4,TBX5,GABPA	TCF7L2,PKNOX2,TBX5,ETV7,TCF3,ERF::HOXB13
chr13-24617975-24619059	chr13	24617975	24619059	374491	TPTE2P6	24539842	24623642	24566873	51643	374491	TPTE2P6	+	NK	Distal Intergenic	RREB1,ELK4,TBX20,ETV3,TBX4,TBX5,ZBTB7A,PLAGL2,ELF1,ELF3,ETV1,GABPA	TCF7L2,ELK4,TBX20,ETV3,POU3F3,TBX5,ETV7,ZNF341,ETV1,POU2F3,TCF7,ELK1::HOXA1,ETV2::FOXI1,FLI1::FOXI1,FOXO1::FLI1
chr13-44593797-44594331	chr13	44593797	44594331	8848	TSC22D1	44420635	44693097	44576565	-17498	8848	TSC22D1	-	NK	Distal Intergenic	ELF1,ELF3,ETV1,GABPA	KLF3,ETV1,TCF3,ETV2::FIGLA
chr13-48707365-48707865	chr13	48707365	48707865	57105	CYSLTR2	48615900	48814820	48653729	53885	57105	CYSLTR2	+	NK	3' UTR	EOMES,ETV1	NKX2-8,ZNF680,ETV1,POU2F3
chr13-109707976-109708671	chr13	109707976	109708671	101409253	LINC00676	109564490	109757425	109728282	-19958	101409253	LINC00676	+	NK	Intron	TBX2,TBX20,EOMES,TBR1,TBX4,TBX5,TBX18,ELF3,RUNX3,TBX21	TBX20,TBR1,TBX5,TBX18,ZNF135,ZNF460,ZKSCAN5,CDX1
chr14-50362460-50363147	chr14	50362460	50363147	8814	CDKL1	50330786	50427431	50363976	1172	8814	CDKL1	-	NK	Exon	MEIS1,ELF3,GABPA	MEIS2,ERF::FOXO1,ETV2::FOXI1,ETV5::FOXI1,FLI1::FOXI1,FOXO1::ELK3
chr14-51596460-51596960	chr14	51596460	51596960	122786	FRMD6	51424910	51771725	51565227	31482	122786	FRMD6	+	NK	Intron	ELF1,ELF3,GABPA	HNF4A,ETV7,SPIB,ETV5::DRGX
chr14-59201981-59202506	chr14	59201981	59202506	23002	DAAM1	59041407	59413801	59188699	13543	23002	DAAM1	+	NK	Intron	RREB1,ETV1	POU3F3,ETV1
chr14-61379412-61379961	chr14	61379412	61379961	5583	PRKCH	61301779	61556951	61390694	-11007	5583	PRKCH	+	NK	Intron	RREB1,TBX2,TBX20,EOMES,MGA,TBR1,TBX15,TBX1,TBX4,TBX5,TBX18,TBX21,TBX3	TCF7L2,TBX20,PKNOX2,TBR1,TBX1,TBX5,TBX18,FOXO1::FLI1
chr14-63510358-63510898	chr14	63510358	63510898	5529	PPP2R5E	63386328	63592390	63508238	-2389	5529	PPP2R5E	-	NK	Intron	MEIS1,RUNX3	NKX2-8,MEIS2,RUNX2,ETS2,ATF2,ZNF16,ESRRA,PKNOX1,FOXO1::ELK3
chr14-92717648-92718148	chr14	92717648	92718148	5641	LGMN	92682146	92748625	92717459	-438	5641	LGMN	-	NK	Intron		ZKSCAN5,CDX1
chr14-99286704-99287785	chr14	99286704	99287785	64919	BCL11B	98991446	99342387	99271524	-15719	64919	BCL11B	-	NK	Promoter	RREB1,TBX2,TBX20,EOMES,MGA,TBR1,TBX15,TBX1,TBX18,TBX21,TBX3	SPIC,TBX20,TBR1,TBX1,TFAP2A,TFAP2B,TFAP2C,TBX18,ZNF136,MAFK,NFIL3,ERF::HOXB13,ETV2::FIGLA,ETV5::DRGX,FOXO1::ELK3,FOXO1::FLI1
chr14-105290443-105291490	chr14	105290443	105291490	2972	BRF1	105249291	105300515	105300468	9501	2972	BRF1	-	NK	Intron	RREB1,MGA,TBR1,TBX15,PLAGL2,TBX18,RUNX3,TBX3	ETV2,PKNOX2,TBR1,HNF4A,TBX18,ZNF135,ZNF460,TCF3,ETV2::FIGLA
chr15-34331705-34332306	chr15	34331705	34332306	9990	SLC12A6	34233046	34340591	34336844	4838	9990	SLC12A6	-	NK	Intron	TBX2	POU3F3,POU2F3
chr15-75333576-75334076	chr15	75333576	75334076	54939	COMMD4	75309364	75336059	75335891	-2064	54939	COMMD4	+	NK	Distal Intergenic	EOMES	KLF3,ZNF135,ZNF460,MAFK,TCF3
chr15-77179580-77180173	chr15	77179580	77180173	79834	PEAK1	77131566	77420278	77179808	-67	79834	PEAK1	-	NK	Promoter	RUNX3	MEF2C,RUNX2,ZNF16
chr15-94305027-94305670	chr15	94305027	94305670	55784	MCTP2	94169739	94882932	94298266	7081	55784	MCTP2	+	NK	Intron	RREB1,ELK4,ZBTB7A,ELF1,ELF3,ETV1,GABPA	ELK4,SPIC,ETV7,ATF2,ZKSCAN5,ZNF680,ETV1,SPIB
chr16-3818485-3819613	chr16	3818485	3819613	1387	CREBBP	3727299	3934863	3782861	-36187	1387	CREBBP	-	NK	Intron	ELK4,TBX20,EOMES,MGA,TBX15,TBX1,TBX4,TBX5,PLAGL2,TBX18,ELF1,ELF3,ETV1,GABPA,RUNX3,TBX3	ELK4,TBX20,TBX1,TBX5,TFAP2A,TFAP2B,TFAP2C,TBX18,ZNF135,ZNF460,ZKSCAN5,ETV1,PKNOX1,SPIB
chr16-29640815-29641404	chr16	29640815	29641404	6693	SPN	29631123	29663267	29662979	-21869	6693	SPN	+	NK	Distal Intergenic	RREB1,ELF1,ELF3	SPIC,TFAP2B,HES6,HNF4A,KLF3,ZNF135,ZNF460,ZKSCAN5,MAFK,PKNOX1,SPIB,ERF::FOXO1
chr16-50326954-50327613	chr16	50326954	50327613	29117	BRD7	50316517	50458632	50320377	-6905	29117	BRD7	-	NK	Intron	TBX4,TBX5	TFEB,TBX5,ZNF16,TCF7
chr16-68062706-68063261	chr16	68062706	68063261	4775	NFATC3	68057673	68077646	68077340	-14356	4775	NFATC3	+	NK	Intron	PLAGL2	ZNF460
chr16-81442467-81443800	chr16	81442467	81443800	80790	CMIP	81415095	81514625	81445170	-2036	80790	CMIP	+	NK	Distal Intergenic	RREB1,MGA,TBX15,TBX18,RUNX3,TBX21	TCF7L2,RUNX2,TP73,MYCN,KLF3,TBX18,ZNF460,ZNF16,ZNF341,ZNF680
chr16-88653267-88654365	chr16	88653267	88654365	4597	MVD	88652369	88674827	88653584	-231	4597	MVD	-	NK	Promoter	RREB1,TBX2,MGA,TBX15,TBX1,TBX4,TBX5,ETV1,GABPA,TBX21	FOXL1,TFEB,ETV2,TBX1,TBX5,TFAP2A,TFAP2B,TFAP2C,KLF3,ZNF460,ETV1,MAFK,PKNOX1,SPIB,TCF3,ETV2::FOXI1,ETV5::DRGX,FLI1::FOXI1
chr16-89723521-89724084	chr16	89723521	89724084	92822	ZNF276	89720997	89738735	89723606	195	92822	ZNF276	+	NK	Promoter	RREB1,PLAGL2,TBX18	KLF3,TBX18,ZNF460,SPIB
chr17-1200926-1201815	chr17	1200926	1201815	29	ABR	1027181	1228940	1187322	-14047	29	ABR	-	NK	Intron	RREB1,TBX20,MEIS1,PLAGL2	TBX20,TFAP2A,TFAP2B,ZNF135,ZNF460,ATF2,ZNF680,ESRRA,MAFK,TCF3,ERF::FOXO1,ETV2::FIGLA
chr17-46020068-46020588	chr17	46020068	46020588	284058	KANSL1	46016382	46259053	46033512	13183	284058	KANSL1	-	NK	Intron	ELF1,ELF3,ETV1,GABPA	SPIC,KLF3,ZNF460,ETV7,ZNF16,ETV1,SPIB
chr17-67248194-67248694	chr17	67248194	67248694	9931	HELZ	67116476	67294236	67245989	-2454	9931	HELZ	-	NK	Intron	TBX2,TBX20,EOMES,TBR1,TBX1,PLAGL2,TBX18,TBX21,TBX3	TBX20,TBR1,TBX1,TFAP2B,TFAP2C,TBX18,ZNF135,ZNF460,MAFK,PKNOX1,ERF::FOXO1
chr17-67407676-67408176	chr17	67407676	67408176	26207	PITPNC1	67371955	67464513	67378966	28959	26207	PITPNC1	+	NK	Intron	EOMES	MEF2C,MEF2B,TP73,KLF3,ZNF135,ZNF136,ZNF460,ATF2,ZNF16,MAFK
chr17-68253206-68254027	chr17	68253206	68254027	51321	AMZ2	68146522	68255234	68251286	2329	51321	AMZ2	+	NK	Intron	ELK4,MEIS1,ZBTB7A,ELF1,ELF3,ETV1,GABPA	MEF2C,ELK4,FOXL1,SPIC,ETS2,ZNF135,ZNF460,ZKSCAN5,ZNF341,ETV1,SPIB,TCF3,ELK1::HOXA1,ETV2::FIGLA,ETV5::FOXI1,FLI1::DRGX,FLI1::FOXI1,FOXO1::ELK3,FOXO1::FLI1,HOXD12::ELK1
chr18-6269892-6270392	chr18	6269892	6270392	91133	L3MBTL4	6101865	6463326	6311625	41482	91133	L3MBTL4	-	NK	Intron	ELF1,ELF3	MEF2B,PKNOX1,POU2F3
chr18-13487154-13487751	chr18	13487154	13487751	753	LDLRAD4	13462482	13576703	13465015	22436	753	LDLRAD4	+	NK	Exon	TBX4,TBX5,ZBTB7A,TBX18,ELF1,ELF3,ETV1,GABPA	TBX5,MYCN,TBX18,ZNF135,ZNF16,ZNF680,ETV1,TCF3,ERF::FOXO1,ETV2::FOXI1,ETV5::FOXI1,FLI1::FOXI1,FOXO1::ELK3,FOXO1::FLI1
chr18-23307421-23308401	chr18	23307421	23308401	85019	TMEM241	23243521	23445392	23331215	23303	85019	TMEM241	-	NK	Intron	RREB1,ETV1,GABPA	FOS,ETV2,TFAP2A,FOSB::JUNB,ZNF460,ZKSCAN5,ZNF16,ETV1,MAFK,ETV2::FIGLA,ETV2::FOXI1
chr18-31634201-31634712	chr18	31634201	31634712	9331	B4GALT6	31625171	31723358	31658464	24007	9331	B4GALT6	-	NK	Intron	RREB1,TBX2,TBX20,EOMES,TBR1,TBX18,RUNX3,TBX21,TBX3	TBX20,TBR1,TBX18,ZNF341,ESRRA,SPIB,ETV2::FIGLA
chr18-46055438-46055948	chr18	46055438	46055948	9050	PSTPIP2	45980625	46079428	46040287	-15405	9050	PSTPIP2	-	NK	Intron	ELK4,ELF1,ELF3,ETV1,GABPA,RUNX3	ELK4,ZNF135,ZNF460,ZKSCAN5,ETV1,HOXD12::ELK1
chr18-51151355-51151916	chr18	51151355	51151916	51320	MEX3C	51137286	51305151	51197320	45684	51320	MEX3C	-	NK	Distal Intergenic	MEIS1,ELF1,ELF3,ETV1,GABPA	MEIS2,PKNOX2,ETV1,ERF::FOXO1,CDX1
chr18-55457043-55457543	chr18	55457043	55457543	6925	TCF4	55176631	55471679	55464137	6843	6925	TCF4	-	NK	Intron	RREB1,TBX2,TBX20,EOMES,MGA,TBR1,TBX15,TBX1,TBX4,TBX5,TBX18,TBX21,TBX3	TCF7L2,TBX20,PKNOX2,TBR1,TBX1,TBX5,TP73,TBX18,CDX1
chr18-69876418-69876918	chr18	69876418	69876918	10666	CD226	69817398	69990838	69895809	19140	10666	CD226	-	NK	Intron	TBX2,TBR1,TBX4,TBX5,TBX18,TBX21,TBX3	PKNOX2,TBR1,TBX5,TBX18,ZKSCAN5,PKNOX1,ETV2::FIGLA
chr18-79326248-79326847	chr18	79326248	79326847	374868	ATP9B	79032042	79384123	79336626	-10078	374868	ATP9B	+	NK	Intron	TBX20,EOMES,MGA,TBX15,TBX21,TBX3	TCF7L2,TBX20,TCF7,ETV2::FIGLA
chr18-79684166-79685101	chr18	79684166	79685101	9150	CTDP1	79603461	79800010	79681459	3173	9150	CTDP1	+	NK	Intron	MGA,TBX15,TBX1,TBX4,TBX5,TBX18	MEF2C,TCF7L2,MEF2B,TBX1,TBX5,MYCN,TBX18,TCF3
chr19-3788906-3789443	chr19	3788906	3789443	4145	MATK	3778070	3828859	3789347	172	4145	MATK	-	NK	Promoter	ELF1,GABPA	KLF3,ZNF135,ZNF460,SPIB
chr19-10796925-10798110	chr19	10796925	10798110	1785	DNM2	10780815	10813352	10798387	-869	1785	DNM2	+	NK	Exon	RREB1,ELK4,TBX4,TBX5,ZBTB7A	ELK4,ETV2,PKNOX2,TBX5,KLF3,ZNF135,ZNF460,ETV7,ZKSCAN5,ETV2::FOXI1,FLI1::FOXI1,CDX1
chr19-38924301-38924804	chr19	38924301	38924804	54938	SARS2	38914103	38930340	38921874	-2677	54938	SARS2	-	NK	Intron	ELK4,TBR1,ZBTB7A,ELF1,ELF3,ETV1,GABPA,TBX21,TBX3	ELK4,SPIC,TBR1,ZNF135,ZKSCAN5,ETV1,MAFK
chr19-39297840-39298436	chr19	39297840	39298436	282618	IFNL1	39282420	39305830	39296325	1812	282618	IFNL1	+	NK	Exon	TBX2,TBX20,MGA,TBR1,TBX15,PLAGL2,TBX18,ELF1,ETV1,GABPA,TBX21,TBX3	TBX20,PKNOX2,TBR1,TFAP2A,TFAP2B,TFAP2C,TBX18,ZNF135,ZNF460,ZKSCAN5,ETV1,TCF3
chr19-50003235-50003735	chr19	50003235	50003735	51231	VRK3	49971179	50025576	50001415	-2069	51231	VRK3	-	NK	Intron		HNF4A,ETV2::FOXI1
chr20-2865457-2866656	chr20	2865457	2866656	64601	VPS16	2865048	2869665	2865911	144	64601	VPS16	+	NK	Promoter	RREB1,ETV3,ELF1,ETV1,GABPA	ETV2,ETV3,RUNX2,ETS2,HNF4A,KLF3,ZNF135,ZNF460,ZKSCAN5,ZNF16,ESRRA,ETV1,PKNOX1,SPIB,ERF::FOXO1,ETV2::FIGLA,ETV2::FOXI1,ETV5::FOXI1,FLI1::FOXI1,FOXO1::ELK3,FOXO1::FLI1
chr20-5604624-5605145	chr20	5604624	5605145	56261	GPCPD1	5529192	5680709	5610924	6039	56261	GPCPD1	-	NK	Intron	RREB1,ETV1	MEF2C,ZNF135,ZNF460,ETV1,MAFK
chr20-36627924-36628529	chr20	36627924	36628529	84174	SLA2	36626844	36673445	36645881	17654	84174	SLA2	-	NK	Intron	PLAGL2	FOXL1,RUNX2,ATF2,CDX1
chr20-50386122-50386660	chr20	50386122	50386660	101927586	LINC01271	50316159	50415831	50321342	-65048	101927586	LINC01271	-	NK	Distal Intergenic	RREB1,ELK4,ZBTB7A	ELK4,RUNX2,TFAP2A,TFAP2B,TFAP2C,ZNF460,ZKSCAN5,PKNOX1
chr21-37225382-37226044	chr21	37225382	37226044	10311	DSCR3	37218994	37316854	37229483	3769	10311	DSCR3	-	NK	3' UTR	MEIS1,RUNX3	SPIC,BCL6
chr22-37149203-37150473	chr22	37149203	37150473	3560	IL2RB	37122986	37180501	37149990	151	3560	IL2RB	-	NK	Promoter	RREB1,ELK4,ETV3,ZBTB7A,PLAGL2,ELF1,ELF3,ETV1,GABPA	ELK4,ETV3,TP73,ETS2,ZNF135,ZNF460,ZKSCAN5,ZNF16,ETV1,ETV2::FOXI1
chr22-37162345-37163149	chr22	37162345	37163149	3560	IL2RB	37122986	37180501	37175054	12306	3560	IL2RB	-	NK	Intron	RREB1,PLAGL2	FOXL1,TFAP2A,TFAP2B,TFAP2C,HNF4A,ZNF460,ZNF16,ESRRA
chr1-75745200-75745837	chr1	75745200	75745837	34	ACADM	75667732	75747487	75745477	40	34	ACADM	+	Monocytes	3' UTR	SPIC,ATF4,HLF,NFIL3,SPIB	SPIC,POU3F2,TBX4,ZNF384,EHF,RUNX3,SPIB,SP5	SREBP2,SPI1,CEBPB,STAT3
chr1-84459990-84460490	chr1	84459990	84460490	80135	RPF1	84443745	84491550	84479259	-19018	80135	RPF1	+	Monocytes	Distal Intergenic	CEBPD,SPIB	SPIB,SP5	CEBPB,SPI1
chr1-87869592-87870155	chr1	87869592	87870155	100505768	LINC01364	87351719	88027938	87371655	-498217	100505768	LINC01364	-	Monocytes	Intron	SPIC,SPIB	SPIC,FOSL2::JUN,FOSL2::JUND,BACH2,EHF,ELF3,SPIB,ERF::FOXO1,FOXO1::ELK1	SREBP2,CDK8,CEBPB,STAT3,CREBBP,SMC1A,SMC1,SPI1
chr1-90325115-90325663	chr1	90325115	90325663	284695	ZNF326	89920847	90356187	89995137	330251	284695	ZNF326	+	Monocytes	Distal Intergenic	CEBPA,CEBPD	NR2F2,RORB,HOXA4,ZNF768,FOXO1::ELK1,MGA::EVX1	STAT3,SPI1,CEBPB,SMC1A
chr1-118039005-118039516	chr1	118039005	118039516	200162	SPAG17	117947293	118549674	118039342	81	200162	SPAG17	-	Monocytes	Promoter	JUN,SPIC,ATF4,CEBPA,CEBPD,SPIB	SREBF2,MEF2B,SPIC,FOSL2::JUN,FOSL2::JUND,GFI1,EHF,ELF3,RUNX3,SPIB	STAT3,CEBPB,SREBP2,SPI1,CREBBP,CDK8
chr1-119565039-119565576	chr1	119565039	119565576	644242	LINC00622	119553295	119623522	119599271	33963	644242	LINC00622	-	Monocytes	Intron	SPIB	MIXL1,RAX2,NFIC,KLF2,ZNF768,SPIB,ETV5::FOXI1,SP5,ESX1	STAT3,SPI1
chr1-166511698-166512198	chr1	166511698	166512198	57645	POGK	166503209	166851652	166839447	-327498	57645	POGK	+	Monocytes	Distal Intergenic		ZBTB12	SREBP2,CEBPB,STAT3,SPI1
chr1-169608177-169608693	chr1	169608177	169608693	6403	SELP	169589080	169646100	169619219	10783	6403	SELP	-	Monocytes	Intron	SPIC,ATF4,SPIB	SPIC,ETV7,EHF,ELF3,SPIB,FOXO1::ELK1	SPI1
chr1-171744978-171745478	chr1	171744978	171745478	8674	VAMP4	171697372	171761955	171742247	-2980	8674	VAMP4	-	Monocytes	Distal Intergenic	DBP,HLF,NFIL3	SREBF2,ZNF384,ETV5::FOXI1	CEBPB,STAT3,CREBBP
chr1-172726687-172727195	chr1	172726687	172727195	356	FASLG	172633666	172855053	172659144	67796	356	FASLG	+	Monocytes	Distal Intergenic	SPIC,HLF,NFIL3	SPIC,TBX20,NFIC,BHLHE22,MYOD1	SPI1
chr1-215530492-215530992	chr1	215530492	215530992	51133	KCTD3	215325455	215851906	215567392	-36649	51133	KCTD3	+	Monocytes	Distal Intergenic	CEBPG,CEBPA,CEBPD,HLF,SPIB,CEBPE	FOXI1,ETS1,CEBPG,ZNF675,EBF3,EHF,ELF3,SPIB,ERF::FOXO1,FOXO1::ELK1	STAT3,CEBPB
chr1-228944931-228945431	chr1	228944931	228945431	58480	RHOU	228690618	229003069	228735077	210103	58480	RHOU	+	Monocytes	Distal Intergenic		RARA::RXRA,NFIC,EBF3,EBF1,RUNX3,MGA::EVX1	STAT3,SPI1
chr1-247407041-247407741	chr1	247407041	247407741	114548	NLRP3	247374002	247447944	247416156	-8764	114548	NLRP3	+	Monocytes	Intron	SPIC,SPIB	KLF5,SPIC,RAX2,VENTX,ETS1,NR2F2,KLF2,NR6A1,ETV7,ZNF768,EHF,ELF3,SPIB,ERF::FOXO1,ETV5::FOXI1,FOXO1::ELK1,ZNF75D	SREBP2,SMC1,STAT3,SMC1A,SPI1,CREBBP
chr1-248568978-248569551	chr1	248568978	248569551	127068	OR2T34	248567125	248584262	248574757	5492	127068	OR2T34	-	Monocytes	Distal Intergenic	JUN,ATF4,SPIB	TCF7L2,ZNF384,ZNF675,SPIB,TWIST1,ERF::FOXO1,FLI1::DRGX,FOXO1::ELK1	CEBPB,STAT3,SPI1
chr2-11903004-11903517	chr2	11903004	11903517	100506457	MIR3681HG	11851436	12152857	11865885	37374	100506457	MIR3681HG	+	Monocytes	Intron	SPIC,SPIB	SREBF2,MSC,SPIC,ZNF675,SPIB	CEBPB,SPI1
chr2-16717462-16717979	chr2	16717462	16717979	81553	FAM49A	16317441	17102728	16666331	-51388	81553	FAM49A	-	Monocytes	Distal Intergenic	JUN,SPIC,ATF4	RARA::RXRA,SPIC,NFIC,NR2F2,KLF2	SREBP2,SMC1A,CEBPB,STAT3,SMC1,CREBBP,SPI1
chr2-16862479-16862979	chr2	16862479	16862979	81553	FAM49A	16317441	17102728	16666331	-196397	81553	FAM49A	-	Monocytes	Distal Intergenic	JUN,CEBPD,HLF,NFIL3	RARA::RXRA,SREBF2,KLF5,ZNF384,KLF2	SREBP2,CDK8,CEBPB,CREBBP,STAT3,SPI1
chr2-32496622-32497122	chr2	32496622	32497122	57448	BIRC6	32329236	32528455	32502860	-5987	57448	BIRC6	+	Monocytes	Intron	JUN,ATF4,NFIL3,SPIB	KLF5,MEF2B,ZBTB12,SPIB,SP5	CEBPB,SREBP2,STAT3,SMC1A,CDK8,SPI1,CREBBP,SMC1
chr2-42648759-42649259	chr2	42648759	42649259	57504	MTA3	42494334	42736668	42659520	-10510	57504	MTA3	+	Monocytes	Intron	JUN,SPIC	MSC,SPIC,KLF2,EHF,RUNX3,FOXO1::ELK1	SPI1,CEBPB,SMC1A,STAT3
chr2-42804321-42804821	chr2	42804321	42804821	23498	HAAO	42767078	42916067	42792593	-11977	23498	HAAO	-	Monocytes	Distal Intergenic	CEBPG,CEBPA,CEBPD,HLF,SPIB,CEBPE	POU6F1,CEBPG,EBF3,SPIB	SMC1A,CEBPB,SREBP2,STAT3,SPI1,CREBBP
chr2-47798594-47799521	chr2	47798594	47799521	80204	FBXO11	47796684	48110215	47809185	10127	80204	FBXO11	-	Monocytes	Promoter	DBP,SPIC,ATF4,SPIB	TCF7L2,SPIC,ETV7,EHF,ELF3,SPIB,ETV5::FOXI1	STAT3,CEBPB,SPI1,SMC1A,CREBBP,SMC1
chr2-104572808-104573354	chr2	104572808	104573354	101927360	LINC01103	104472444	104632692	104510509	-62571	101927360	LINC01103	-	Monocytes	Distal Intergenic	ATF4,SPIB	RARA::RXRA,NR2F2,ETV7,SPIB,ERF::FOXO1	CEBPB,SREBP2,STAT3,CREBBP,SPI1
chr2-104772920-104773420	chr2	104772920	104773420	284998	LINC01114	104632693	104804586	104757719	-15450	284998	LINC01114	-	Monocytes	Intron	JUN,ATF4,CEBPA,CEBPD	MSC,ZBTB7B,ZNF384,BHLHE22,ETV2::FIGLA	SPI1,CEBPB,CDK8
chr2-104781118-104781618	chr2	104781118	104781618	284998	LINC01114	104632693	104804586	104757719	-23648	284998	LINC01114	-	Monocytes	Intron	SPIC,CEBPA,HLF,NFIL3	MEF2B,SPIC,POU3F2,ZNF384,JUN::JUNB,BACH2,EHF,ERF::FOXO1,FOXO1::ELK1,HOXB2::ELK1	CEBPB,SMC1A,CDK8,SREBP2,STAT3,SPI1
chr2-138814454-138814954	chr2	138814454	138814954	11249	NXPH2	138672369	139539158	138780348	-34355	11249	NXPH2	-	Monocytes	Distal Intergenic		FOXI1,MEF2B	SMC1,SMC1A,STAT3,CEBPB,SPI1
chr2-166090307-166090807	chr2	166090307	166090807	6323	SCN1A	165975083	166216983	166073697	-16859	6323	SCN1A	-	Monocytes	Intron	JUN,ATF4,CEBPA,CEBPD,NFIL3	TCF7L2,DMRT3,MIXL1,MGA::EVX1	CEBPB,STAT3,SREBP2
chr2-181846339-181846839	chr2	181846339	181846839	6744	SSFA2	181786355	181937423	181891833	-45243	6744	SSFA2	+	Monocytes	Distal Intergenic	DBP,ATF4,CEBPA,HLF,NFIL3	TCF7L2,ARNT2,ZNF768,EBF1	SREBP2
chr2-236711427-236711927	chr2	236711427	236711927	57007	ACKR3	236537665	236827476	236569641	142035	57007	ACKR3	+	Monocytes	Distal Intergenic		ZNF675,ETV5::FOXI1,FOXO1::ELK1,ZNF75D	SREBP2
chr3-7607619-7608119	chr3	7607619	7608119	2917	GRM7	6010129	7976744	7451781	156087	2917	GRM7	+	Monocytes	Exon	ATF4	RARA::RXRA,ZNF384,FOSL2::JUN,JUN::JUNB,FOSL2::JUND,BACH2,ERF::FOXO1,SP5	STAT3,CEBPB,SPI1
chr3-12356888-12357418	chr3	12356888	12357418	5468	PPARG	12224457	12432074	12351569	5583	5468	PPARG	+	Monocytes	Intron		NR2F2,ZEB1,NR6A1,ZNF768,MYOD1,RUNX3,TCF4,TWIST1	SMC1,SREBP2,STAT3,SMC1A,SPI1
chr3-15342959-15343459	chr3	15342959	15343459	9467	SH3BP5	15261574	15378614	15341368	-1840	9467	SH3BP5	-	Monocytes	Distal Intergenic	CEBPA,CEBPD,HLF,NFIL3	ZNF549,ETV2::FIGLA	SREBP2,SPI1,CEBPB,SMC1A,CREBBP,CDK8,STAT3,SMC1
chr3-15438916-15439416	chr3	15438916	15439416	131965	METTL6	15434083	15447261	15440566	1399	131965	METTL6	-	Monocytes	5' UTR	SPIC,SPIB	SPIC,ZNF384,ZBTB12,EHF,ELF3,SPIB,FLI1::DRGX,HOXB2::ELK1	SREBP2,SPI1,CREBBP,CEBPB,STAT3
chr3-16876124-16876624	chr3	16876124	16876624	23228	PLCL2	16736479	16933143	16884959	-8584	23228	PLCL2	+	Monocytes	Intron	SPIB	ETV7,ZNF549,EHF,ELF3,MITF,RUNX3,SPIB,SP5	SMC1A,SPI1,STAT3,CREBBP
chr3-21509751-21510251	chr3	21509751	21510251	79750	ZNF385D	20808709	22788106	21510986	984	79750	ZNF385D	-	Monocytes	Intron	CEBPG,CEBPA,CEBPD,CEBPE	DMRT3,CEBPG,ZBTB12,ZNF549,ERF::FOXO1,FLI1::DRGX,FOXO1::ELK1	CEBPB,SMC1A,STAT3,SREBP2,CDK8,CREBBP
chr3-27976815-27977451	chr3	27976815	27977451	100996624	LINC01981	27778424	28037860	27834136	-142996	100996624	LINC01981	-	Monocytes	Intron	SPIC,ATF4,CEBPA,CEBPD,SPIB,CEBPB,CEBPE	SPIC,FOSL2::JUN,JUN::JUNB,FOSL2::JUND,EBF1,SPIB	CDK8,CEBPB,STAT3,SPI1,IRF1,CREBBP,SMC1,SREBP2,SMC1A
chr3-31233513-31234735	chr3	31233513	31234735	100423038	MIR466	31028277	31347212	31161787	-72336	100423038	MIR466	-	Monocytes	Distal Intergenic	DBP,SPIC,HLF,NFIL3	RARA::RXRA,KLF5,SPIC,TBX2,TBX20,ZBTB7B,ZNF384,ZNF549,ZNF768,SP5,TBX21	CEBPB,SMC1A,STAT3,SPI1
chr3-32477554-32478098	chr3	32477554	32478098	54918	CMTM6	32469693	32504898	32488381	10554	54918	CMTM6	-	Monocytes	Intron	CEBPA	SREBF2,POU3F2,ZNF384,KLF2,HOXA5	CREBBP
chr3-87706089-87706621	chr3	87706089	87706621	8545	CGGBP1	87667767	88099086	88058945	352589	8545	CGGBP1	-	Monocytes	Intron	ATF4,SPIB	MIXL1,RAX2,EBF3,ZNF768,EBF1,SPIB,MGA::EVX1,ESX1	SPI1,STAT3,CEBPB,CDK8
chr3-87780814-87781314	chr3	87780814	87781314	8545	CGGBP1	87667767	88099086	88058945	277880	8545	CGGBP1	-	Monocytes	Intron	CEBPG,CEBPA,CEBPD,HLF,NFIL3,SPIB	DMRT3,TBX20,CEBPG,SPIB,ERF::FOXO1	CEBPB,CDK8,SPI1,STAT3,SREBP2,CREBBP,SMC1A,SMC1
chr3-117084274-117084774	chr3	117084274	117084774	4045	LSAMP	117030411	118034821	117139389	54864	4045	LSAMP	-	Monocytes	Intron	SPIC	SPIC,ETV7,ZNF675,MYOD1,FOXO1::ELK1	SPI1
chr3-129958689-129959189	chr3	129958689	129959189	7200	TRH	129933941	130028259	129974305	-15365	7200	TRH	+	Monocytes	Intron	SPIC,ATF4,HLF,SPIB	MIXL1,SPIC,NFIC,NR2F2,ZNF384,NR6A1,GFI1,ZNF675,EHF,ELF3,SPIB,FOXO1::ELK1,MGA::EVX1	CEBPB,STAT3,CREBBP,SPI1,SREBP2,SMC1A
chr3-130354396-130354915	chr3	130354396	130354915	256076	COL6A5	130219712	130501909	130345516	9138	256076	COL6A5	+	Monocytes	Intron		MIXL1,MSC,ELF3	STAT3,SPI1,CEBPB
chr3-154178148-154178648	chr3	154178148	154178648	26084	ARHGEF26	153802750	154251810	154225785	-47386	26084	ARHGEF26	+	Monocytes	Intron	JUN,SPIC,CEBPG,ATF4,CEBPA,CEBPD,HLF,NFIL3,CEBPB,CEBPE	TCF7L2,SPIC,VENTX,CEBPG,RUNX3,ETV5::FOXI1,FOXO1::ELK1	CEBPB,SREBP2,SPI1,STAT3
chr3-184497810-184498310	chr3	184497810	184498310	2049	EPHB3	184473287	184645875	184561784	-63723	2049	EPHB3	+	Monocytes	Distal Intergenic		FOSL2::JUN,JUN::JUNB,FOSL2::JUND,BACH2,KLF2,ZNF768	SMC1
chr4-47173894-47174420	chr4	47173894	47174420	2560	GABRB1	47012884	47247649	47031633	142523	2560	GABRB1	+	Monocytes	Intron	JUN	TCF7L2,TBX20,TBX4,ZNF384,KLF2,RUNX3,SP5	SREBP2,CDK8,CEBPB,STAT3,SPI1,CREBBP,SMC1A
chr4-109040360-109040860	chr4	109040360	109040860	84570	COL25A1	108793637	109368214	109050182	9571	84570	COL25A1	-	Monocytes	Intron	SPIC	POU6F1,NKX2-3,SPIC,NR2F2,ZNF675,ZNF549,EHF,ELF3,ERF::FOXO1,ETV5::FOXI1,FLI1::DRGX,FOXO1::ELK1,ESX1	CEBPB,STAT3
chr4-123385157-123385657	chr4	123385157	123385657	10252	SPRY1	123159949	123525117	123396795	-11387	10252	SPRY1	+	Monocytes	Distal Intergenic	SPIB	MEF2B,NR2F2,FOSL2::JUN,JUN::JUNB,FOSL2::JUND,BACH2,ZBTB12,SPIB	SPI1,STAT3
chr4-141328994-141329537	chr4	141328994	141329537	100507639	LINC02432	141272249	141484608	141326007	-3257	100507639	LINC02432	-	Monocytes	Intron	ATF4,CEBPA	KLF5,EVX2,KLF2,GFI1,RUNX3,FOXO1::ELK1,MGA::EVX1	SREBP2,CREBBP,SMC1,CDK8,CEBPB,STAT3,SPI1,SMC1A
chr4-168759812-168760368	chr4	168759812	168760368	23022	PALLD	168488791	168964181	168712159	47930	23022	PALLD	+	Monocytes	Intron	SPIC,SPIB	MEF2B,SPIC,ZNF384,ETV7,BHLHE22,SPIB,SP5	SREBP2,SMC1A,SPI1,CEBPB,STAT3
chr4-173002684-173003184	chr4	173002684	173003184	51809	GALNT7	172989057	173218485	173168753	-165818	51809	GALNT7	+	Monocytes	Intron	SPIC,ATF4,CEBPA,CEBPD,NFIL3,SPIB	MEF2B,SPIC,ZNF384,EHF,ELF3,RUNX3,SPIB	CDK8,CEBPB,SPI1,STAT3,SMC1A,SMC1,SREBP2,CREBBP
chr4-176090083-176090625	chr4	176090083	176090625	116966	WDR17	176034250	176183604	176096485	-6130	116966	WDR17	+	Monocytes	Intron	SPIC,SPIB	SPIC,ZNF384,SPIB,TWIST1,ERF::FOXO1,ETV5::FOXI1,FOXO1::ELK1,HOXB2::ELK1	SREBP2,SMC1,SMC1A,CEBPB,STAT3,CREBBP,SPI1
chr4-185734096-185734681	chr4	185734096	185734681	8470	SORBS2	185562724	186012902	185740330	5941	8470	SORBS2	-	Monocytes	5' UTR	SPIC,SPIB	RARA::RXRA,KLF5,DMRT3,SPIC,EVX2,FOSL2::JUND,KLF2,EHF,SPIB,ERF::FOXO1,ETV5::FOXI1,FOXO1::ELK1,MGA::EVX1	STAT3,SREBP2,CREBBP,SPI1,SMC1A
chr5-6645501-6646012	chr5	6645501	6646012	6715	SRD5A1	6633318	6670583	6633456	12299	6715	SRD5A1	+	Monocytes	Intron	CEBPG,CEBPA,CEBPD	SREBF2,KLF5,DMRT3,MSC,CEBPG,ZNF384,NR6A1	CEBPB,CREBBP,CDK8,SMC1A,STAT3,SPI1,SMC1
chr5-32207248-32207748	chr5	32207248	32207748	54545	MTMR12	32204122	32338973	32233893	26394	54545	MTMR12	-	Monocytes	Distal Intergenic	SPIC	MIXL1,SPIC,RAX2,POU3F2,EVX2,GFI1,ZNF549,EHF,ELF3,ERF::FOXO1,FOXO1::ELK1,SP5,ESX1	SPI1,CEBPB
chr5-55903270-55904633	chr5	55903270	55904633	3572	IL6ST	55903552	55995080	55947594	43642	3572	IL6ST	-	Monocytes	Intron		RELA,KLF5,ZEB1,RORB,ARNT2,BACH2,KLF2,GFI1,HOXA5,ETV7,EBF3,ZNF768,EBF1,TWIST1,SP5	SREBP2,STAT3,SMC1,CREBBP,SPI1,SMC1A
chr5-83406895-83407395	chr5	83406895	83407395	1462	VCAN	83288187	83613453	83471465	-64319	1462	VCAN	+	Monocytes	Distal Intergenic	CEBPA,CEBPD,HLF,NFIL3	DMRT3	STAT3,CEBPB
chr5-90696119-90696619	chr5	90696119	90696619	84059	ADGRV1	90544193	91083277	90694060	2308	84059	ADGRV1	+	Monocytes	Intron	SPIB	EHF,ELF3,SPIB,ERF::FOXO1,ETV5::FOXI1,FOXO1::ELK1	SPI1,STAT3,CEBPB
chr5-95261550-95262050	chr5	95261550	95262050	79772	MCTP1	94701440	95337959	95284000	22199	79772	MCTP1	-	Monocytes	Intron	JUN,SPIC,SPIB	SPIC,ETV7,ZNF549,EHF,ELF3,SPIB	SMC1,SMC1A,CEBPB,SREBP2,STAT3,SPI1
chr5-136000838-136001338	chr5	136000838	136001338	7045	TGFBI	135991965	136070893	136028895	-27806	7045	TGFBI	+	Monocytes	Distal Intergenic	SPIC,SPIB	RARA::RXRA,SPIC,ETS1,EBF3,ZNF768,EHF,ELF3,SPIB,ETV2::FIGLA,FOXO1::ELK1	SREBP2,CEBPB,CREBBP,SPI1,SMC1A
chr5-141603764-141604850	chr5	141603764	141604850	1729	DIAPH1	141516413	141622562	141618914	14606	1729	DIAPH1	-	Monocytes	Intron	SPIB	BACH2,KLF2,EBF3,ZNF549,ZNF768,EBF1,EHF,ELF3,SPIB,ERF::FOXO1,ETV2::FIGLA,ETV5::FOXI1,FOXO1::ELK1,SP5	STAT3,CREBBP,SMC1A,CEBPB,CDK8,SMC1,SPI1,IRF1
chr6-10603203-10603703	chr6	10603203	10603703	2651	GCNT2	10465971	10636648	10585746	17706	2651	GCNT2	+	Monocytes	Intron	SPIC	SPIC,ZNF384,KLF2,RUNX3,SP5	SREBP2,SMC1A
chr6-83590336-83590836	chr6	83590336	83590836	9892	SNAP91	83546523	83781478	83592982	2395	9892	SNAP91	-	Monocytes	Intron	DBP,CEBPG,HLF,NFIL3,CEBPB,CEBPE	SREBF2,DMRT3,CEBPG,ZNF384,EBF3,EHF,ELF3	SREBP2,STAT3,CEBPB
chr6-129454446-129454946	chr6	129454446	129454946	3908	LAMA2	128701908	129543805	129490683	-35986	3908	LAMA2	+	Monocytes	Intron	DBP,SPIC,CEBPA,CEBPD,HLF,NFIL3,SPIB	TCF7L2,SPIC,ZNF675,SPIB,ERF::FOXO1,ETV5::FOXI1,FOXO1::ELK1,SP5	SPI1,CEBPB,STAT3
chr6-137351772-137352415	chr6	137351772	137352415	3459	IFNGR1	137196510	137356849	137219449	-132643	3459	IFNGR1	-	Monocytes	Distal Intergenic	JUN	GFI1,RUNX3,CREM,SP5,ZNF75D	SREBP2,SPI1,SMC1,STAT3,CEBPB,SMC1A,CREBBP
chr6-143965750-143966282	chr6	143965750	143966282	5325	PLAGL1	143912925	144008261	143964868	-1147	5325	PLAGL1	-	Monocytes	5' UTR		SREBF2,NKX2-3,ZBTB7B,NFIC,ETV7,MYOD1,RUNX3	STAT3,SPI1
chr6-144161955-144162455	chr6	144161955	144162455	8676	STX11	144123050	144218113	144150526	11678	8676	STX11	+	Monocytes	5' UTR		ERF::FOXO1,SP5,ZNF75D	SREBP2,STAT3,SPI1
chr6-146582796-146583296	chr6	146582796	146583296	79747	ADGB	146571330	146826432	146598965	-15918	79747	ADGB	+	Monocytes	Distal Intergenic		RARA::RXRA,SREBF2,KLF5,KLF2,MGA::EVX1	SREBP2,STAT3,SMC1A,SPI1,CEBPB,CREBBP,SMC1
chr6-157757332-157757921	chr6	157757332	157757921	51429	SNX9	157665755	157924568	157716046	41579	51429	SNX9	+	Monocytes	Intron	SPIB	RARA::RXRA,ETV7,EHF,ELF3,SPIB,CREM	STAT3,SREBP2,SPI1
chr6-161355695-161356195	chr6	161355695	161356195	56895	AGPAT4	161197110	161421740	161274061	-81883	56895	AGPAT4	-	Monocytes	Intron		KLF5,NFIC,ETV7,ZNF549,EBF1,EHF,ELF3,SP5	SREBP2,CEBPB,SPI1,STAT3
chr6-161366436-161366948	chr6	161366436	161366948	56895	AGPAT4	161197110	161421740	161274061	-92630	56895	AGPAT4	-	Monocytes	Intron	SPIC,CEBPA,CEBPD,SPIB	SPIC,ZNF384,EHF,SPIB,ETV5::FOXI1	SREBP2,SPI1
chr6-162184338-162184838	chr6	162184338	162184838	135138	PACRG	162148277	162727400	162727132	-542543	135138	PACRG	+	Monocytes	Intron	SPIC,SPIB	KLF5,GRHL1,SPIC,TBX2,ZNF549,SPIB,TBX21,HES5	STAT3,SPI1,CEBPB
chr6-169955625-169956125	chr6	169955625	169956125	401288	LINC00242	169794574	170035649	169798825	-157049	401288	LINC00242	-	Monocytes	Distal Intergenic		KLF5,KLF2,ZNF549,SP5	STAT3,CEBPB,SPI1,SMC1A
chr7-931353-931853	chr7	931353	931853	11033	ADAP1	896850	965261	935180	3576	11033	ADAP1	-	Monocytes	Intron	CEBPG,CEBPA,CEBPD,HLF,SPIB	SREBF2,KLF5,CEBPG,ZNF384,KLF2,BHLHE22,SPIB	SREBP2,STAT3,SMC1,CDK8,SMC1A,CEBPB,SPI1
chr7-2647529-2648638	chr7	2647529	2648638	80727	TTYH3	2615039	2667807	2647956	126	80727	TTYH3	+	Monocytes	Promoter		KLF5,ZEB1,KLF2,BHLHE22,ZBTB12,MYOD1,TCF4,ZNF75D	SREBP2,SPI1
chr7-31640331-31640831	chr7	31640331	31640831	223075	CCDC129	31427483	31669348	31651982	-11400	223075	CCDC129	+	Monocytes	Intron		RARA::RXRA,TCF7L2,NFIC,ZNF384,ZNF675,ETV2::FIGLA,FOXO1::ELK1	STAT3,SPI1
chr7-38394525-38395074	chr7	38394525	38395074	273	AMPH	38329199	38679376	38392719	-2079	273	AMPH	-	Monocytes	Intron	DBP,SPIC,HLF,NFIL3,SPIB	SPIC,ZNF384,NR6A1,EHF,ELF3,SPIB,FLI1::DRGX,FOXO1::ELK1,TBX21	STAT3,CEBPB,SPI1
chr7-80443241-80443741	chr7	80443241	80443741	346562	GNAT3	80440798	80557085	80512020	68528	346562	GNAT3	-	Monocytes	Intron	DBP,SPIC,HLF,NFIL3,SPIB	RELA,RARA::RXRA,SPIC,ETV7,ZNF768,EHF,ELF3,SPIB	STAT3,SREBP2,SPI1,CDK8,CREBBP,CEBPB
chr7-99248226-99248726	chr7	99248226	99248726	402569	KPNA7	99175804	99266702	99207506	-40969	402569	KPNA7	-	Monocytes	Intron	ATF4	MEF2B,ZNF384,FOSL2::JUN,JUN::JUNB,FOSL2::JUND,BACH2,KLF2,ZBTB12,ZNF549	CEBPB,SREBP2,STAT3
chr7-116859211-116859821	chr7	116859211	116859821	830	CAPZA2	116790369	116934347	116862473	-2956	830	CAPZA2	+	Monocytes	Intron	SPIC,CEBPA,CEBPD,SPIB	DMRT3,FOXI1,SPIC,RAX2,POU3F2,ZNF675,SPIB,ERF::FOXO1,ETV5::FOXI1,FOXO1::ELK1	SREBP2,CEBPB,STAT3,SPI1
chr7-151920386-151920886	chr7	151920386	151920886	168391	GALNTL5	151916923	152010306	151956379	-35742	168391	GALNTL5	+	Monocytes	Distal Intergenic	JUN,ATF4	RARA::RXRA,TCF7L2,SREBF2,MSC,BHLHE22,ZBTB12,MYOD1,HOXB2::ELK1	SREBP2,CEBPB
chr8-18069257-18069757	chr8	18069257	18069757	427	ASAH1	18043413	18127731	18064916	-4590	427	ASAH1	-	Monocytes	Exon		ZNF384	SPI1,SREBP2,CREBBP,CEBPB,STAT3,SMC1
chr8-19844963-19845463	chr8	19844963	19845463	55174	INTS10	19787585	19875240	19844128	1084	55174	INTS10	+	Monocytes	Exon	DBP,CEBPA,CEBPD,HLF,NFIL3,SPIB	POU6F1,NFIC,ZEB1,ZNF384,FOSL2::JUN,JUN::JUNB,FOSL2::JUND,BACH2,ZNF675,SPIB	CEBPB,STAT3,CDK8
chr8-23063219-23063731	chr8	23063219	23063731	8795	TNFRSF10B	23017737	23085884	23069021	5545	8795	TNFRSF10B	-	Monocytes	Intron	JUN,CEBPG,ATF4,CEBPB,CEBPE	CEBPG,ZNF384,ZNF549,CREM	SREBP2,CEBPB,SPI1,STAT3
chr8-26456022-26456654	chr8	26456022	26456654	10687	PNMA2	26454293	26514183	26512967	56628	10687	PNMA2	-	Monocytes	Intron	JUN,SPIB	DMRT3,MEF2B,ZNF384,EHF,ELF3,SPIB,TCF4	SPI1,STAT3
chr8-118285293-118285793	chr8	118285293	118285793	401474	SAMD12	118245730	118775534	118379605	94061	401474	SAMD12	-	Monocytes	Intron	JUN,CEBPG,CEBPA,CEBPD,HLF,SPIB,CEBPB,CEBPE	RARA::RXRA,FOXI1,CEBPG,RORB,SPIB,ERF::FOXO1,ETV5::FOXI1
chr8-124702759-124703259	chr8	124702759	124703259	9788	MTSS1	124551626	124775243	124727616	24606	9788	MTSS1	-	Monocytes	Intron	CEBPG,CEBPA,CEBPD,HLF,CEBPE	POU3F2,CEBPG,GFI1,MITF
chr8-141093502-141094002	chr8	141093502	141094002	22898	DENND3	141059748	141210450	141117278	-23525	22898	DENND3	+	Monocytes	Distal Intergenic	JUN,ATF4,NFIL3	RARA::RXRA,TBX2,ZEB1,BHLHE22,EBF3,EBF1,TCF4,CREM,SP5,TBX21
chr9-21817083-21817670	chr9	21817083	21817670	4507	MTAP	21681107	21913126	21803278	14097	4507	MTAP	+	Monocytes	Intron	CEBPD	MEF2B,ELF3,FOXO1::ELK1
chr9-27335067-27335567	chr9	27335067	27335567	54586	EQTN	27289767	27359426	27297139	-38177	54586	EQTN	-	Monocytes	Intron	JUN,NFIL3	POU6F1,FOXI1,POU3F2,ZNF549,CREM,SP5,ESX1
chr9-69937267-69938260	chr9	69937267	69938260	256691	MAMDC2	69932271	70100560	70043581	-105817	256691	MAMDC2	+	Monocytes	Distal Intergenic	JUN,SPIB	DMRT3,FOSL2::JUN,FOSL2::JUND,NR6A1,GFI1,SPIB,CREM,ETV5::FOXI1,FLI1::DRGX
chr9-69945541-69946045	chr9	69945541	69946045	256691	MAMDC2	69932271	70100560	70043581	-97787	256691	MAMDC2	+	Monocytes	Distal Intergenic	SPIC	SPIC,NFIC,ZNF384,ZNF549,EHF,ELF3,ERF::FOXO1,ETV5::FOXI1,FOXO1::ELK1
chr9-88923495-88924475	chr9	88923495	88924475	286223	C9orf47	88868385	88991187	88990863	-66877	286223	C9orf47	+	Monocytes	Distal Intergenic	JUN,CEBPA,CEBPD,SPIB	KLF5,NKX2-3,ETS1,ZNF549,EHF,ELF3,SPIB,FEV
chr9-94643009-94643509	chr9	94643009	94643509	2203	FBP1	94616651	94683475	94640249	-3009	2203	FBP1	-	Monocytes	Distal Intergenic		KLF5,SP5
chr9-94649064-94649591	chr9	94649064	94649591	2203	FBP1	94616651	94683475	94640249	-9077	2203	FBP1	-	Monocytes	Distal Intergenic	SPIC	RARA::RXRA,SREBF2,KLF5,MEF2B,SPIC,NR2F2,KLF2,ZNF675,EBF3
chr9-94651893-94652393	chr9	94651893	94652393	2203	FBP1	94616651	94683475	94640249	-11893	2203	FBP1	-	Monocytes	Distal Intergenic	SPIB	KLF5,POU3F2,ZNF384,BHLHE22,ZNF768,SPIB,ETV2::FIGLA
chr9-136067065-136067739	chr9	136067065	136067739	138151	NACC2	135990431	136106779	136050580	-16821	138151	NACC2	-	Monocytes	Intron	HLF,NFIL3,SPIB	KLF5,MEF2B,NKX2-3,ZEB1,ZNF384,HOXA4,KLF2,MYOD1,SPIB,TCF4,SP5,ZNF75D
chr9-136075962-136076719	chr9	136075962	136076719	138151	NACC2	135990431	136106779	136095285	18944	138151	NACC2	-	Monocytes	Intron	SPIB	FOXI1,EBF3,ZNF768,RUNX3,SPIB,ERF::FOXO1,FOXO1::ELK1
chr10-7180251-7180751	chr10	7180251	7180751	57713	SFMBT2	7094172	7490943	7408745	228243	57713	SFMBT2	-	Monocytes	Intron		KLF5,MEF2B,NR2F2,ZNF384,FOSL2::JUN,BACH2,KLF2,EBF3,ZNF768,MYOD1,TCF4,MGA::EVX1,SP5	STAT3
chr10-14618596-14619096	chr10	14618596	14619096	83641	FAM107B	14492184	14801551	14612552	-6293	83641	FAM107B	-	Monocytes	Intron	JUN,SPIC,ATF4,NFIL3	DMRT3,GRHL1,MEF2B,SPIC,ETS1,NFIC,ZEB1,ZNF384,GFI1,EHF,ELF3,TCF4,ETV5::FOXI1,FOXO1::ELK1	SREBP2,CEBPB,STAT3
chr10-31949181-31949681	chr10	31949181	31949681	94134	ARHGAP12	31595138	31974985	31928876	-20554	94134	ARHGAP12	-	Monocytes	Distal Intergenic		ZNF384,NR6A1,EBF3	SREBP2,STAT3,CEBPB,SMC1,SMC1A
chr10-43366768-43367268	chr10	43366768	43367268	53828	FXYD4	43319281	43385643	43371642	-4623	53828	FXYD4	+	Monocytes	Distal Intergenic	SPIB	RARA::RXRA,ZNF384,ZNF549,SPIB	SREBP2,CEBPB,SPI1
chr10-47255048-47255548	chr10	47255048	47255548	2662	GDF10	47120485	47311438	47300386	-45087	2662	GDF10	+	Monocytes	Distal Intergenic	ATF4	SREBF2,EBF3,ZNF549,EHF,ELF3,ERF::FOXO1,FOXO1::ELK1	SREBP2,SMC1A,CEBPB,SPI1,STAT3,IRF1,SMC1
chr10-124340864-124341599	chr10	124340864	124341599	4942	OAT	124248472	124434580	124403336	62104	4942	OAT	-	Monocytes	Distal Intergenic	ATF4,SPIB	SREBF2,KLF5,KLF2,BHLHE22,EBF3,ZNF549,EBF1,ELF3,SPIB	SMC1A,CEBPB,CREBBP,STAT3,SMC1,SPI1
chr10-133235201-133235701	chr10	133235201	133235701	27287	VENTX	133233840	133242512	133237404	-1952	27287	VENTX	+	Monocytes	Distal Intergenic		KLF5,ZBTB7B,ZNF549,EBF1,SP5	SPI1,STAT3
chr11-29518623-29519155	chr11	29518623	29519155	106456574	LINC01616	29229971	29999375	29982392	463502	106456574	LINC01616	-	Monocytes	Exon		GRHL1,NR2F2,EHF,MYOD1,ERF::FOXO1,ETV2::FIGLA,FLI1::DRGX,FOXO1::ELK1,SP5	SMC1A,SMC1,CEBPB
chr11-69079146-69079646	chr11	69079146	69079646	100422846	MIR3164	69069170	69188657	69083176	-3779	100422846	MIR3164	+	Monocytes	Exon	SPIB	KLF5,GFI1,EBF3,ZNF549,EBF1,EHF,ELF3,SPIB	SREBP2,CREBBP,CEBPB,SPI1,STAT3,SMC1,SMC1A
chr11-111019657-111020226	chr11	111019657	111020226	341032	C11orf53	110984586	111277264	111255982	-236040	341032	C11orf53	+	Monocytes	Intron	JUN,ATF4	NKX2-3,ZNF549,MYOD1	STAT3,SMC1A,SREBP2,SPI1,CDK8,CEBPB,CREBBP,SMC1,IRF1
chr11-115931128-115931630	chr11	115931128	115931630	283143	LINC00900	115632572	116261731	115760627	-170751	283143	LINC00900	-	Monocytes	Intron	SPIB	MEF2B,POU3F2,EHF,ELF3,SPIB,ETV2::FIGLA,HOXB2::ELK1,SP5,TBX21	SREBP2,SMC1A,STAT3,SPI1
chr11-124732162-124732662	chr11	124732162	124732662	4900	NRGN	124717777	124746119	124739846	-7433	4900	NRGN	+	Monocytes	Distal Intergenic	SPIB	KLF5,ZBTB7B,HOXA4,KLF2,NR6A1,ZNF768,EHF,SPIB,FOXO1::ELK1	SREBP2,CEBPB,SMC1A,SPI1,STAT3
chr12-8572393-8573040	chr12	8572393	8573040	26253	CLEC4E	8526398	8573989	8540963	-31752	26253	CLEC4E	-	Monocytes	Distal Intergenic	SPIC	KLF5,MIXL1,SPIC,RAX2,ZNF384,ESX1,ZNF75D	SMC1A,SREBP2,SPI1,STAT3,CEBPB
chr12-38392473-38392973	chr12	38392473	38392973	144245	ALG10B	36169526	38493917	38316839	75883	144245	ALG10B	+	Monocytes	Distal Intergenic	CEBPA,CEBPD	KLF5,POU3F2,FOSL2::JUN,JUN::JUNB,FOSL2::JUND,BACH2,SP5	SPI1,CEBPB,SREBP2,SMC1A,STAT3,CREBBP,CDK8
chr12-41339744-41340244	chr12	41339744	41340244	29951	PDZRN4	41108782	41636870	41437683	-97688	29951	PDZRN4	+	Monocytes	Intron		FOXI1,MEF2B,POU3F2	CEBPB,SPI1,SMC1A
chr12-41653606-41654106	chr12	41653606	41654106	101927038	LINC02400	41636871	41954467	41764189	-110332	101927038	LINC02400	+	Monocytes	Distal Intergenic	CEBPG,CEBPA,CEBPD,HLF,SPIB,CEBPB,CEBPE	KLF5,CEBPG,ZNF384,GFI1,ELF3,SPIB,SP5	SPI1,CEBPB,STAT3,SMC1A,SMC1
chr12-51242063-51242596	chr12	51242063	51242596	9802	DAZAP2	51238827	51254307	51239295	3033	9802	DAZAP2	+	Monocytes	3' UTR	JUN,SPIB	RARA::RXRA,ZNF675,BHLHE22,ZBTB12,ZNF549,SPIB,TWIST1,ERF::FOXO1,ETV5::FOXI1,FOXO1::ELK1,ZNF75D	SREBP2,CREBBP,CEBPB,SMC1A,STAT3,SPI1
chr12-54882074-54882601	chr12	54882074	54882601	118430	MUCL1	54739507	54908640	54854583	27753	118430	MUCL1	+	Monocytes	Intron	SPIC,SPIB	SPIC,POU3F2,GFI1,EBF1,EHF,ELF3,SPIB,ETV5::FOXI1,FOXO1::ELK1	SREBP2,STAT3,SMC1A,SPI1,SMC1,CDK8,CEBPB,CREBBP
chr12-68367761-68368615	chr12	68367761	68368615	56890	MDM1	68278240	68382517	68332381	-35806	56890	MDM1	-	Monocytes	Intron	CEBPG,CEBPA,CEBPD,NFIL3,SPIB	RARA::RXRA,CEBPG,NFIC,RORB,KLF2,EBF3,ZNF768,SPIB,ETV2::FIGLA	CEBPB,SREBP2,SPI1
chr12-76155894-76156401	chr12	76155894	76156401	4673	NAP1L1	76084685	76216737	76085033	-71113	4673	NAP1L1	-	Monocytes	Distal Intergenic	SPIB	NR2F2,ZNF384,EHF,ELF3,SPIB	SREBP2,CEBPB,CDK8,CREBBP,SMC1A,SPI1,STAT3
chr12-82966082-82966583	chr12	82966082	82966583	160335	TMTC2	82581590	83813194	82758555	207776	160335	TMTC2	+	Monocytes	Intron	CEBPA,HLF,NFIL3,SPIB	ZNF384,GFI1,EHF,ELF3,SPIB,SP5	CDK8,CEBPB,STAT3,SPI1,SMC1A
chr12-92300713-92301225	chr12	92300713	92301225	574028	CLLU1	92283715	92426053	92421531	-120561	574028	CLLU1	+	Monocytes	Intron	SPIB	TCF7L2,ETV7,EBF3,ZNF549,EHF,ELF3,SPIB	SMC1A,STAT3,SPI1,CEBPB,CDK8,SMC1,CREBBP
chr12-98408618-98409118	chr12	98408618	98409118	643770	LINC02453	98243268	98509683	98491086	82217	643770	LINC02453	-	Monocytes	Distal Intergenic	JUN,HLF,NFIL3,SPIB	NR2F2,RORB,NR6A1,EHF,SPIB	CEBPB,SPI1
chr12-108884355-108884971	chr12	108884355	108884971	1610	DAO	108858262	108918680	108880351	4311	1610	DAO	+	Monocytes	Intron	JUN,ATF4	NR2F2,EBF3,EBF1	SMC1,SMC1A,SREBP2,STAT3,IRF1,CEBPB,SPI1,CREBBP
chr12-109846985-109847601	chr12	109846985	109847601	59341	TRPV4	109833375	109856863	109833401	-13891	59341	TRPV4	-	Monocytes	Distal Intergenic	SPIB	SREBF2,MSC,ZNF384,ZNF549,SPIB	CEBPB,SPI1
chr12-124171555-124172055	chr12	124171555	124172055	144347	RFLNA	124143436	124319646	124289164	-117358	144347	RFLNA	+	Monocytes	Intron	HLF,NFIL3,SPIB	RARA::RXRA,NR2F2,ZEB1,ZNF675,SPIB	SREBP2,CEBPB,SMC1A
chr12-128843386-128844492	chr12	128843386	128844492	144423	GLT1D1	128838706	128975068	128853427	-9487	144423	GLT1D1	+	Monocytes	Distal Intergenic	JUN,ATF4	MEF2B,MIXL1,RAX2,ZNF384,FOSL2::JUN,JUN::JUNB,FOSL2::JUND,BACH2,KLF2,MITF,RUNX3,SP5,ESX1	SREBP2,STAT3,SMC1,CREBBP,CEBPB,SPI1,SMC1A
chr13-24253627-24254997	chr13	24253627	24254997	221178	SPATA13	24193329	24289927	24251718	2593	221178	SPATA13	+	Monocytes	Promoter	SPIB	RARA::RXRA,FOXI1,TBX20,ETS1,ZEB1,ZNF384,KLF2,ETV7,ZNF675,BHLHE22,EBF3,ZNF768,EBF1,MYOD1,SPIB,TCF4,ERF::FOXO1,FOXO1::ELK1,SP5	SREBP2,SMC1A,STAT3,CREBBP,CEBPB,SPI1,CDK8
chr13-41654713-41655275	chr13	41654713	41655275	23078	VWA8	41632258	42000578	41696119	41124	23078	VWA8	-	Monocytes	Intron	SPIC,SPIB	SPIC,POU3F2,NR2F2,ZNF384,NR6A1,EHF,ELF3,RUNX3,SPIB,TWIST1,ERF::FOXO1,FLI1::DRGX,FOXO1::ELK1	SPI1,STAT3,CREBBP,CEBPB,CDK8
chr13-48614882-48615410	chr13	48614882	48615410	100129597	LINC00462	48555673	48615899	48578088	-37057	100129597	LINC00462	-	Monocytes	Distal Intergenic	SPIC,SPIB	SPIC,ETV7,EHF,SPIB,ETV5::FOXI1,FOXO1::ELK1	CEBPB,SPI1
chr13-110697826-110698326	chr13	110697826	110698326	79587	CARS2	110630172	110712611	110705616	7539	79587	CARS2	-	Monocytes	3' UTR	SPIC,SPIB	SPIC,TBX4,ZNF384,ZNF675,EHF,SPIB,ETV5::FOXI1,FOXO1::ELK1	SREBP2,SPI1,STAT3
chr14-77378683-77379183	chr14	77378683	77379183	161394	SAMD15	77377122	77400094	77377133	1799	161394	SAMD15	+	Monocytes	Exon		RAX2,ZNF768,EHF,ELF3	SREBP2,CEBPB,SPI1
chr14-83255018-83255518	chr14	83255018	83255518	101928559	LINC01467	81578462	83505168	81623061	-1632206	101928559	LINC01467	-	Monocytes	Distal Intergenic	NFIL3	KLF5,NKX2-3,ZNF384,FOSL2::JUN,JUN::JUNB,FOSL2::JUND,BACH2,EBF3,EBF1,EHF,ELF3,ETV2::FIGLA	CEBPB,STAT3
chr14-90294767-90295267	chr14	90294767	90295267	55051	NRDE2	90273380	90364319	90288885	-6131	55051	NRDE2	-	Monocytes	Exon	ATF4,CEBPA	RARA::RXRA,HEY2,ARNT2,ERF::FOXO1,FOXO1::ELK1	SREBP2,CEBPB,SMC1A,IRF1,STAT3,SPI1
chr14-92492151-92492678	chr14	92492151	92492678	79890	RIN3	92483271	92682145	92513774	-21359	79890	RIN3	+	Monocytes	Exon	SPIB	HEY2,NKX2-3,NFIC,BACH2,KLF2,ZNF675,EBF1,SPIB,ETV2::FIGLA,HES5	SREBP2,STAT3,SPI1,SMC1A
chr15-41215747-41216247	chr15	41215747	41216247	161829	EXD1	41153363	41230791	41230542	14544	161829	EXD1	-	Monocytes	Exon	SPIC,CEBPA,CEBPD,SPIB	SPIC,PAX3,ZNF675,EHF,ELF3,SPIB,ERF::FOXO1,FOXO1::ELK1,SP5	CDK8,SPI1,CEBPB,SREBP2,STAT3,CREBBP
chr15-84724798-84725400	chr15	84724798	84725400	23478	SEC11A	84666195	84732675	84716716	-8382	23478	SEC11A	-	Monocytes	Intron	SPIC,CEBPA	RARA::RXRA,SPIC,ETS1,TBX4,ZNF549,EHF,ELF3,FOXO1::ELK1,MGA::EVX1	IRF1,CEBPB,SMC1,STAT3,CREBBP,SMC1A,SPI1
chr16-10628886-10629386	chr16	10628886	10629386	146279	TEKT5	10626239	10719365	10671778	42641	146279	TEKT5	-	Monocytes	Intron	CEBPG,CEBPA,CEBPD,HLF,CEBPE	RELA,ETS1,CEBPG,ZNF384,TWIST1	SREBP2,CDK8,CREBBP,SPI1,STAT3,CEBPB,SMC1A,SMC1
chr16-84114213-84114713	chr16	84114213	84114713	8720	MBTPS1	84050341	84130672	84116795	2331	8720	MBTPS1	-	Monocytes	Intron	SPIC,SPIB	DMRT3,MEF2B,SPIC,ZEB1,ZNF384,KLF2,ZNF675,EHF,ELF3,SPIB,TCF4,FLI1::DRGX,ZNF75D	SREBP2
chr16-85733131-85733631	chr16	85733131	85733631	404550	C16orf74	85700462	85766193	85750951	17569	404550	C16orf74	-	Monocytes	Intron	JUN,SPIC,CEBPG,ATF4,CEBPA,CEBPD,HLF,SPIB,CEBPE	SREBF2,SPIC,ETS1,CEBPG,EHF,ELF3,SPIB,ERF::FOXO1,ETV5::FOXI1,FOXO1::ELK1,FEV	SREBP2,SPI1,STAT3,CEBPB
chr17-7644676-7645176	chr17	7644676	7645176	482	ATP1B2	7638969	7663848	7646627	-1700	482	ATP1B2	+	Monocytes	Distal Intergenic	SPIB	ZBTB7B,ZEB1,ZNF384,ETV7,ZNF549,EHF,ELF3,SPIB,TCF4	STAT3,SPI1,CEBPB
chr17-74786358-74787086	chr17	74786358	74787086	54868	TMEM104	74776426	74818196	74776520	10201	54868	TMEM104	+	Monocytes	Intron	SPIC,CEBPG,SPIB,CEBPB,CEBPE	KLF5,SPIC,CEBPG,KLF2,NR6A1,ZNF675,SPIB,ETV5::FOXI1,SP5	SPI1,SREBP2,CEBPB,STAT3,CREBBP
chr17-78541751-78542285	chr17	78541751	78542285	8632	DNAH17	78503663	78603782	78571322	29303	8632	DNAH17	-	Monocytes	Intron		SREBF2,KLF5,ZNF384,FOSL2::JUN,JUN::JUNB,FOSL2::JUND,BACH2,KLF2,EHF,ELF3,SP5	SREBP2,SMC1A,STAT3,CREBBP,SPI1,SMC1,CEBPB
chr17-78613457-78613957	chr17	78613457	78613957	101928710	LINC02081	78603783	78656561	78630170	16462	101928710	LINC02081	-	Monocytes	Intron	SPIC,CEBPA,CEBPD	HEY2,SPIC,ZBTB7B,ZNF384,RORB,ARNT2,EHF,RUNX3,ERF::FOXO1,FOXO1::ELK1,HES5	SREBP2,SMC1A,CDK8,SPI1,CEBPB,STAT3,CREBBP,SMC1
chr18-10004921-10005530	chr18	10004921	10005530	9218	VAPA	9900009	10175548	9936727	68497	9218	VAPA	+	Monocytes	Distal Intergenic	JUN,ATF4,SPIB	POU6F1,MIXL1,MSC,RAX2,ZNF549,MYOD1,SPIB,ETV2::FIGLA,ESX1	CEBPB,SPI1,CDK8,STAT3,SMC1A,SMC1
chr18-45682961-45683461	chr18	45682961	45683461	6563	SLC14A1	45669805	45782507	45724127	-40915	6563	SLC14A1	+	Monocytes	3' UTR	SPIC,ATF4,SPIB	SREBF2,SPIC,ZNF384,MYOD1,SPIB,TCF4,ZNF75D	SREBP2,SPI1,CEBPB
chr18-68728311-68728811	chr18	68728311	68728811	79839	CCDC102B	68715306	69123725	68734732	-6170	79839	CCDC102B	+	Monocytes	Intron		ZNF384,NR6A1,ZNF675	STAT3,CEBPB,SMC1A
chr19-7645226-7645726	chr19	7645226	7645726	6813	STXBP2	7635315	7658049	7645196	279	6813	STXBP2	+	Monocytes	3' UTR	CEBPA,SPIB	BHLHE22,EBF3,ZNF768,SPIB	SREBP2,SMC1A,CEBPB,STAT3,SPI1,SMC1
chr19-31304930-31305438	chr19	31304930	31305438	57616	TSHZ3	30927555	31468871	31305763	578	57616	TSHZ3	-	Monocytes	Intron	SPIC,HLF,NFIL3	SPIC,ZNF384,ETV5::FOXI1	SREBP2,CDK8,CEBPB,SPI1,SMC1A,STAT3,CREBBP,SMC1
chr19-33816615-33817115	chr19	33816615	33817115	79047	KCTD15	33740231	33989714	33806924	9940	79047	KCTD15	+	Monocytes	Distal Intergenic	SPIC,SPIB	KLF5,POU6F1,MIXL1,SPIC,PAX3,NFIC,ZNF384,SPIB,SP5	SPI1,SREBP2,STAT3
chr19-35447448-35448073	chr19	35447448	35448073	2867	FFAR2	35429271	35470123	35449715	-1954	2867	FFAR2	+	Monocytes	Promoter	SPIC	MEF2B,SPIC,ZEB1,ZNF384,KLF2,MYOD1,TCF4,ERF::FOXO1,FOXO1::ELK1
chr19-52538810-52539310	chr19	52538810	52539310	388558	ZNF808	52510242	52541745	52527668	11391	388558	ZNF808	+	Monocytes	Intron	JUN,SPIB	ZNF384,SPIB,ERF::FOXO1
chr20-47531329-47531829	chr20	47531329	47531829	8202	NCOA3	47429396	47643366	47501941	29637	8202	NCOA3	+	Monocytes	Intron	ATF4,SPIB	RARA::RXRA,KLF5,NR2F2,NR6A1,ETV7,ZNF768,SPIB,TWIST1,ERF::FOXO1,ETV5::FOXI1,FOXO1::ELK1,SP5	CEBPB,SMC1A,STAT3,SPI1,CREBBP
chr20-48910077-48910909	chr20	48910077	48910909	10564	ARFGEF2	48874887	49022173	48921890	-11396	10564	ARFGEF2	+	Monocytes	Distal Intergenic	ATF4	RARA::RXRA,MEF2B,ZBTB7B,POU3F2,ZNF675,BHLHE22,EBF1,EHF,ELF3,ETV2::FIGLA,FOXO1::ELK1	SPI1,STAT3
chr21-29814030-29814530	chr21	29814030	29814530	642976	GRIK1-AS1	29721120	29849963	29760394	53885	642976	GRIK1-AS1	+	Monocytes	Intron	DBP,SPIC,HLF,NFIL3,SPIB	POU6F1,FOXI1,SPIC,ZEB1,ZNF384,FOSL2::JUN,JUN::JUNB,FOSL2::JUND,BACH2,BHLHE22,EHF,MYOD1,SPIB,TCF4,ERF::FOXO1,ETV2::FIGLA,ETV5::FOXI1,FOXO1::ELK1	CEBPB,SPI1,STAT3,SMC1A
chr21-33101172-33101679	chr21	33101172	33101679	116448	OLIG1	33063987	33120190	33070144	31280	116448	OLIG1	+	Monocytes	Distal Intergenic		KLF5,NR2F2,ZEB1,FOSL2::JUND,ZNF549,ZNF768,EBF1,TCF4,SP5	SMC1A,SMC1,SREBP2,STAT3,SPI1
chr22-21810464-21810964	chr22	21810464	21810964	5594	MAPK1	21752632	21896871	21769428	-41285	5594	MAPK1	-	Monocytes	Intron	JUN,HLF,NFIL3	KLF5,VENTX,POU3F2,ZNF384,KLF2,RUNX3	SREBP2,CEBPB,STAT3
chrX-110327340-110327840	chrX	110327340	110327840	9949	AMMECR1	110231306	110338527	110318239	-9350	9949	AMMECR1	-	Monocytes	Intron	ATF4	MEF2B,MIXL1,RAX2,ESX1,ZNF75D
chr1-9728270-9729663	chr1	9728270	9729663	22883	CLSTN1	9724882	9851351	9733486	4519	22883	CLSTN1	-	CD4_Tcells	3' UTR	TCF7L2,RUNX2,SIX1,TCF7L1,SNAI3,MYOD1,RUNX3,SNAI2	ZBTB18,TCF7L1,SNAI3,ZNF257	IRF4,MAF,RELA,ETS1,BCL6,MYB,TBX21,BRD4
chr1-41897779-41898681	chr1	41897779	41898681	59269	HIVEP3	41532287	42094673	41918498	20267	59269	HIVEP3	-	CD4_Tcells	Intron	ETV6,IRF5,TCF7L1,SOHLH2,ZIM3,ETV1,FOXK2,GABPA,ETV2::FOXI1,FLI1::FOXI1,FOXO1::FLI1	RORA,EWSR1-FLI1,JUN,NR2C2,ESR2,ETV6,HEY1,TCF7L1,ZNF460,ATF2,HAND2,GABPA,HOXB2::ELK1,CLOCK	BRD4,MAF,ETS1,IRF4,RELA,MYB,TBX21,JUNB,AFF4
chr1-61736204-61736767	chr1	61736204	61736767	10207	PATJ	61733951	62015549	61742477	-5991	10207	PATJ	+	CD4_Tcells	Distal Intergenic	TCF7L2,SOX10,SNAI1,SNAI3,SNAI2,TCF7	TBX19,POU5F1,BARX2,SNAI3,ZNF460,ZNF257	JUNB
chr1-87045609-87046455	chr1	87045609	87046455	339524	LINC01140	86974747	87230261	86993009	53022	339524	LINC01140	+	CD4_Tcells	Exon	TCF7L2,IRF9,MGA,TBX15,SIX1,TCF7L1,GFI1,ZIM3,MYOD1,RUNX3,TCF7	MGA,TBX15,TCF7L1,MYF5,ETV5::FIGLA,ZNF324	IRF4,JUNB,MAF,MYB,BRD4,BCL6,AFF4,TBX21
chr1-87404189-87404832	chr1	87404189	87404832	100505768	LINC01364	87351719	88027938	87371655	-32854	100505768	LINC01364	-	CD4_Tcells	Distal Intergenic	TCF7L2,SOX10,MYOD1,TCF7,ELK1::HOXB13,ERF::HOXB13	EWSR1-FLI1,POU5F1,FERD3L,MAF,MAFA,NR1I2,MYF5,ERF::FIGLA,ETV5::FIGLA,ETV5::HOXA2,FLI1::DRGX	TBX21,MAF,BRD4,GATA3,MYB,JUNB,IRF4
chr1-99820459-99821040	chr1	99820459	99821040	178	AGL	99808358	99922129	99850084	-29334	178	AGL	+	CD4_Tcells	Distal Intergenic	MEIS3,ZIM3,ETV1,GABPA,MYOD1,SNAI2	EWSR1-FLI1,ZBTB18,ONECUT3,HOXA10,FERD3L,TGIF2LX,GABPA,ETV5::HOXA2,ZNF211	MYB,MAF
chr1-100423829-100424545	chr1	100423829	100424545	8556	CDC14A	100313134	100480934	100423732	454	8556	CDC14A	+	CD4_Tcells	3' UTR	POU6F1,ETV6,GABPA,MYOD1	RORA,ETV6,POU3F1,HOXA10,POU5F1,BARX2,FERD3L,TGIF2LX,MYF5,GABPA,ZNF324	BRD4,JUNB,TBX21
chr1-101178652-101179549	chr1	101178652	101179549	1901	S1PR1	101131489	101280713	101236888	-57787	1901	S1PR1	+	CD4_Tcells	Distal Intergenic	TCF7L2,ETV6,FLI1,IRF9,ERF,ETS1,ETV2,MEIS3,IRF4,IRF5,GFI1,ZIM3,ETV1,GABPA,RUNX3,TCF7,ELK1::HOXB13,ERF::HOXB13,ETV2::FOXI1,FLI1::FOXI1,FOXO1::ELF1	ETV6,ONECUT3,ETV3,POU3F1,HOXA10,GABPA,FOXO1::ELK1,HOXB2::ELK1	BRD4,MED1,MAF,JUN,FOS,NFATC2,JUNB,MYB,TBX21,RELA,IRF4,ETS1
chr1-111624370-111624922	chr1	111624370	111624922	5906	RAP1A	111614251	111683361	111627469	-2822	5906	RAP1A	+	CD4_Tcells	Intron	FLI1,ERF,ETS1,ETV2,ETV1,GABPA,ETV2::FOXI1,FLI1::FOXI1,FOXO1::ELF1	POU3F1,HOXA10,POU5F1,GABPA,FOXO1::ELK1,ZNF211	ETS1,IRF4,TBX21
chr1-154609395-154609925	chr1	154609395	154609925	103	ADAR	154576600	154743921	154608812	-847	103	ADAR	-	CD4_Tcells	Intron	POU6F2,RUNX2,SNAI1,SNAI3,MYOD1,RUNX3,FLI1::FOXI1	EWSR1-FLI1,VSX2,SNAI3,ZNF257,ETV5::FIGLA	JUNB,MAF,BRD4,MYB,ETS1,TBX21
chr1-160640269-160640803	chr1	160640269	160640803	6504	SLAMF1	160613238	160679549	160646958	6421	6504	SLAMF1	-	CD4_Tcells	Intron	GFI1,ZIM3	NR1D2	GATA3,FOS,IRF4,TBX21,JUNB,NFATC2,MED1,AFF4,BCL6,MAF,MYB,BRD4,JUN,RELA
chr1-181395990-181396509	chr1	181395990	181396509	777	CACNA1E	181324746	181772728	181413102	-16852	777	CACNA1E	+	CD4_Tcells	Intron	TCF7	EWSR1-FLI1,ZBTB18,ZNF460,MAFK,NR1D2	JUNB,MAF,BRD4,ETS1,IRF4,TBX21,MYB,FOS
chr1-198619171-198619965	chr1	198619171	198619965	5788	PTPRC	198589809	198770003	198638671	-19102	5788	PTPRC	+	CD4_Tcells	Distal Intergenic	ETV2,SIX1,IRF4,RUNX3,ELK1::HOXB13,ETV2::FOXI1,FLI1::FOXI1,FOXO1::ELF1,FOXO1::FLI1	POU5F1,CDX4,HLF,FOXO1::ELK1,HOXB2::ELK1,ZNF324	ETS1,BRD4
chr1-209751487-209752398	chr1	209751487	209752398	80342	TRAF3IP3	209730440	209782699	209756032	-4089	80342	TRAF3IP3	+	CD4_Tcells	Distal Intergenic	MEIS3,RUNX2,RUNX3	HOXC10,ZNF257	TBX21,MAF,MYB,BRD4,JUN,IRF4,GATA3,AFF4,MED1,BCL6,RELA
chr1-234408681-234409216	chr1	234408681	234409216	6894	TARBP1	234383213	234505434	234407955	-992	6894	TARBP1	-	CD4_Tcells	Intron	POU6F1,ETV1,GABPA	NR2C2,VSX2,POU3F1,GABPA,GRHL2,ESX1	BRD4,JUNB,MAF,AFF4,NFATC2,TBX21,MYB,BCL6,FOS,RELA
chr1-241677084-241677666	chr1	241677084	241677666	23596	OPN3	241669005	241680478	241677376	0	23596	OPN3	-	CD4_Tcells	Promoter	TCF7L2,IRF9,RUNX2,IRF4,ZIM3,SNAI2	RORA,ERF::FIGLA	NFATC2,FOS,BRD4,JUNB,MYB,MAF,TBX21,BCL6,IRF4,RELA,AFF4
chr1-243179634-243180219	chr1	243179634	243180219	9859	CEP170	242826776	243255691	243175188	-4737	9859	CEP170	-	CD4_Tcells	Intron	TCF7L2,ZIM3,TCF7,FOXO1::FLI1	EWSR1-FLI1,CEBPD,HLF
chr2-54897566-54898369	chr2	54897566	54898369	400954	EML6	54693284	54988740	54853851	44115	400954	EML6	+	CD4_Tcells	Intron	ETV2,POU6F2,GFI1,ERF::HOXB13,ETV2::FOXI1,FLI1::FOXI1,FOXO1::ELF1	REL,EWSR1-FLI1,ZBTB18,HAND2,MYF5,MXI1,ETV5::HOXA2,HOXB2::ELK1,ZNF324	BCL6,BRD4,MYB,TBX21
chr2-63977812-63978348	chr2	63977812	63978348	51542	VPS54	63888348	64081717	63975602	-2477	51542	VPS54	-	CD4_Tcells	Intron	ETV6,FLI1,ERF,ETS1,SIX1,SNAI1,MYOD1,SNAI2,ELK1::HOXB13	EWSR1-FLI1,NR2C2,ETV6,ETV3,ELK1,PAX2,ELK3	MYB,GATA3,BCL6,TBX21,IRF4,MAF
chr2-109143735-109144725	chr2	109143735	109144725	100422863	MIR4265	109135469	109227606	109141588	-2641	100422863	MIR4265	-	CD4_Tcells	Intron	ETV6,FLI1,ERF,ETS1,MEIS3,SIX1,SOX10,SNAI1,SNAI3,MYOD1,SNAI2,FLI1::FOXI1	ETV6,ETV3,ELK1,SNAI3,MYF5,HNF4G,ETV5::FIGLA,POU2F1::SOX2,ZNF211,ELK3	TBX21,MYB,BRD4,IRF4,MAF,ETS1,BCL6,GATA3,RELA
chr2-112996505-112997091	chr2	112996505	112997091	27179	IL36A	112991746	113029164	113005461	-8662	27179	IL36A	+	CD4_Tcells	Distal Intergenic	TCF7L2,POU6F2,MGA,TBX15,SOX10,SNAI1,SNAI3,MYOD1,SNAI2,ETV2::FOXI1,FLI1::FOXI1	EWSR1-FLI1,PRRX1,UNCX,MGA,TBX15,SNAI3,ZNF460,LMX1B,ESX1	IRF4,JUN,MAF,MYB,MED1,BRD4,TBX21,ETS1,RELA,AFF4
chr2-147288111-147288640	chr2	147288111	147288640	92	ACVR2A	146457669	147931933	147844517	-556141	92	ACVR2A	+	CD4_Tcells	Distal Intergenic	ETV1,GABPA,ERF::HOXB13	EWSR1-FLI1,BARX2,GABPA,MXI1,ETV5::HOXA2	TBX21,BRD4,IRF4
chr2-147297653-147298318	chr2	147297653	147298318	92	ACVR2A	146457669	147931933	147844517	-546531	92	ACVR2A	+	CD4_Tcells	Distal Intergenic	ETV2,RUNX2,MGA,TBX15,SNAI3,GFI1,GABPA,MYOD1,SNAI2,ETV2::FOXI1,FLI1::FOXI1,FOXO1::ELF1,FOXO1::FLI1	NR2C2,MGA,TBX15,TBX19,BARX2,FERD3L,SNAI3,TGIF2LX,MYF5,CEBPD,GABPA,MXI1,ERF::FIGLA,ETV5::FIGLA,FOXO1::ELK1,POU2F1::SOX2,ZNF211,ZNF324	BRD4,NFATC2,FOS,JUNB,MAF,TBX21,IRF4,MYB,GATA3,RELA,AFF4,JUN
chr2-147623199-147623827	chr2	147623199	147623827	92	ACVR2A	146457669	147931933	147844517	-221003	92	ACVR2A	+	CD4_Tcells	Distal Intergenic	TCF7L2,TCF7L1,ETV1,GABPA,TCF7,ERF::HOXB13	TCF7L1,GABPA,MAFK,MXI1	JUNB,FOS,MAF,BRD4,ETS1,TBX21,NFATC2
chr2-147663354-147664136	chr2	147663354	147664136	92	ACVR2A	146457669	147931933	147844517	-180771	92	ACVR2A	+	CD4_Tcells	Distal Intergenic	TCF7L2,POU6F2,SOX10,TCF7L1,TCF7,ERF::HOXB13	ZBTB18,TCF7L1	IRF4,ETS1,JUNB,BRD4,GATA3,MAF,TBX21
chr2-196200475-196201028	chr2	196200475	196201028	9262	STK17B	196119907	196209379	196176503	-24247	9262	STK17B	-	CD4_Tcells	3' UTR	IRF9,IRF4,GFI1,ZIM3	BARX2,NR1I2,POU2F1::SOX2,MNX1	BRD4,IRF4,BCL6,TBX21,MAF,MYB,JUN
chr2-196914960-196915555	chr2	196914960	196915555	80055	PGAP1	196868504	196960184	196926730	11472	80055	PGAP1	-	CD4_Tcells	Intron	IRF9,IRF4,SNAI3,ZIM3,ETV1,GABPA,SNAI2,TCF7,ETV2::FOXI1,FLI1::FOXI1	ZBTB18,FOSL2::JUND,SNAI3,ZNF257,GABPA,MAFK,FOXO1::ELK1,MNX1	JUNB,BRD4,MAF,AFF4,TBX21,FOS,MYB,NFATC2
chr2-197869516-197870071	chr2	197869516	197870071	5334	PLCL1	197795639	198199231	197810258	59534	5334	PLCL1	+	CD4_Tcells	Intron	TCF7L2,RUNX2,IRF5,GFI1,ETV1,GABPA,RUNX3,ETV2::FOXI1,FLI1::FOXI1	ZBTB18,HOXA10,FERD3L,MAF,MAFA,ZNF257,GABPA,MAFK,FOXO1::ELK1	MYB,TBX21,NFATC2,GATA3,BRD4,ETS1,JUNB,MAF
chr2-203867489-203868022	chr2	203867489	203868022	1493	CTLA4	203787168	203903490	203867786	-30	1493	CTLA4	+	CD4_Tcells	Promoter	IRF9,IRF4,IRF5,ETV1,GABPA,RUNX3	HOXC12,GABPA,MXI1	NFATC2,IRF4,BCL6,MAF,MYB,ETS1,JUNB,AFF4,MED1,TBX21,RELA,BRD4,FOS
chr2-203933899-203935559	chr2	203933899	203935559	29851	ICOS	203903491	204241286	203936748	-2018	29851	ICOS	+	CD4_Tcells	Distal Intergenic	ETV6,FLI1,ERF,ETS1,RUNX2,MGA,TBX15,SIX1,SOHLH2,ZIM3,ETV1,FOXK2,GABPA,RUNX3	REL,ETV6,ETV3,MGA,TBX15,BARX2,HES6,ZNF257,CEBPD,GABPA,HNF4G	NFATC2,MAF,JUNB,BRD4,BCL6,RELA,IRF4,MYB,TBX21,FOS,AFF4,MED1,GATA3
chr2-203987022-203987576	chr2	203987022	203987576	29851	ICOS	203903491	204241286	203936780	50518	29851	ICOS	+	CD4_Tcells	Distal Intergenic		REL,ZNF460,ATF2,NR1D2	NFKB1,BCL6,BRD4,TBX21,RELA
chr2-207046723-207047327	chr2	207046723	207047327	100423036	MIR2355	207024814	207117240	207110073	63047	100423036	MIR2355	-	CD4_Tcells	Distal Intergenic	FLI1,ERF,ETS1,ETV2,POU6F2,GFI1,ETV1,GABPA,ERF::HOXB13,ETV2::FOXI1,FLI1::FOXI1,FOXO1::ELF1,FOXO1::FLI1	VSX2,LMX1B,GABPA,ERF::FIGLA,FOXO1::ELK1	NFATC2,IRF4,MAF,BRD4,TBX21
chr2-207506345-207507435	chr2	207506345	207507435	1385	CREB1	207399581	207610864	207529737	-22846	1385	CREB1	+	CD4_Tcells	Intron	MEIS3,TCF7L1	NR2C2,POU3F1,HOXA10,TCF7L1,ZNF257,HLF	MAF,MYB
chr2-234463964-234464491	chr2	234463964	234464491	10123	ARL4C	234273719	234589860	234496600	32372	10123	ARL4C	-	CD4_Tcells	Distal Intergenic	RUNX2,SOHLH2,ZIM3,FOXK2	HOXC10,FOSL2::JUND,MAF,MAFA,MAFK	FOS,BRD4,NFATC2,JUNB,BCL6,MAF,MYB,GATA3,TBX21,ETS1
chr3-15623696-15624521	chr3	15623696	15624521	686	BTD	15601911	15653112	15630002	-5893	686	BTD	+	CD4_Tcells	Intron	RUNX2,SIX1,IRF4,IRF5,GFI1,ZIM3,FOXK2	NR2C2,ONECUT3,POU2F1,POU3F1	BRD4,NFATC2
chr3-32963737-32964338	chr3	32963737	32964338	1233	CCR4	32884797	32987999	32951574	12462	1233	CCR4	+	CD4_Tcells	Distal Intergenic	TCF7L2,MGA,TBX15,SNAI1,ZIM3	MGA,TBX15,BARX2,HES6,FLI1::DRGX	NFATC2,JUNB,FOS,BRD4,ETS1,TBX21,AFF4
chr3-33023085-33023640	chr3	33023085	33023640	2720	GLB1	32988000	33096796	33024425	1062	2720	GLB1	-	CD4_Tcells	Intron	ETV2::FOXI1,FOXO1::ELF1,FOXO1::FLI1	JUN,NR2C2,HLF,POU2F1::SOX2,ZNF324	NFATC2,TBX21,MAF,GATA3,MYB,JUNB,BRD4,FOS,BCL6,RELA,NFKB1
chr3-42638171-42639018	chr3	42638171	42639018	4820	NKTR	42610450	42648668	42635080	3513	4820	NKTR	+	CD4_Tcells	3' UTR	TCF7L2,ERF,SIX1,IRF4,FOXK2,TCF7,FLI1::FOXI1,FOXO1::ELF1	EWSR1-FLI1,ETV3,HNF4G,ETV5::FIGLA	JUN,NFATC2,IRF4,ETS1,MAF,MYB,TBX21,AFF4,BCL6,BRD4,RELA,MED1
chr3-43755473-43756012	chr3	43755473	43756012	51099	ABHD5	43701651	43915940	43717668	38073	51099	ABHD5	+	CD4_Tcells	Distal Intergenic	TCF7L2,SIX1,TCF7L1,TCF7,ETV2::FOXI1,FLI1::FOXI1,FOXO1::ELF1,FOXO1::FLI1	EWSR1-FLI1,NR2C2,POU2F1,POU3F1,TCF7L1,BARX2,ZNF460,ZNF257,FOXO1::ELK1,ZNF324,MNX1	BRD4,BCL6
chr3-60048321-60049027	chr3	60048321	60049027	2272	FHIT	59532118	60349355	60080840	32165	2272	FHIT	-	CD4_Tcells	Intron	TCF7L2,RUNX2,TCF7L1,SNAI1,SNAI3,RUNX3,SNAI2,TCF7	TCF7L1,SNAI3,ZNF460,CEBPD,ETV5::FIGLA,NR1D2	MYB,IRF4,TBX21,MAF,BRD4,AFF4,GATA3
chr3-108093570-108094092	chr3	108093570	108094092	961	CD47	107968994	108108423	108091025	-2805	961	CD47	-	CD4_Tcells	Distal Intergenic	ETV6,TCF7L1,GFI1,ETV1,FOXK2,GABPA,ERF::HOXB13	ETV6,TCF7L1,GABPA,FLI1::DRGX
chr3-113005506-113006838	chr3	113005506	113006838	25871	NEPRO	113000184	113093840	113008800	2627	25871	NEPRO	-	CD4_Tcells	3' UTR	TCF7L2,IRF9,MEIS3,RUNX2,IRF4,TCF7L1,ETV1,GABPA,TCF7	VSX2,POU5F1,FOSL2::JUND,TCF7L1,FERD3L,TGIF2LX,MYF5,GABPA,POU2F1::SOX2	MAF,JUNB,NFATC2,FOS,BRD4,RELA,TBX21,BCL6,MYB
chr3-136882527-136883066	chr3	136882527	136883066	4690	NCK1	136862132	136945977	136862298	20497	4690	NCK1	+	CD4_Tcells	Intron	ETV6,SNAI3,MYOD1,SNAI2,ERF::HOXB13	ETV6,HES6,SNAI3,ZNF460,MAFK,ETV5::FIGLA
chr3-143855144-143855671	chr3	143855144	143855671	285195	SLC9A9	143408741	143910164	143848531	-6875	285195	SLC9A9	-	CD4_Tcells	Distal Intergenic	TCF7L2,TCF7L1	NR2C2,TCF7L1,MAF,MAFA,HNF4G,NR1D2	GATA3,TBX21
chr3-187770167-187770763	chr3	187770167	187770763	604	BCL6	187714091	187949505	187745727	-24737	604	BCL6	-	CD4_Tcells	Distal Intergenic	TCF7L2,SNAI1,SNAI3,MYOD1,SNAI2	REL,SNAI3,ETV5::FIGLA	NFKB1,MYB,GATA3,BRD4,TBX21,IRF4,MAF,JUNB,RELA,BCL6,FOS
chr3-188170413-188170933	chr3	188170413	188170933	401105	FLJ42393	188166243	188193370	188178543	-7869	401105	FLJ42393	+	CD4_Tcells	Intron	ETV6,ETV2,MGA,TBX15,SNAI1,SNAI3,GABPA,SNAI2,ELK1::HOXB13,ERF::HOXB13	ETV6,MGA,TBX15,SNAI3,ZNF460,GABPA	TBX21,MAF,MYB,RELA,FOS,JUNB,AFF4,BRD4,NFATC2
chr4-83350038-83350690	chr4	83350038	83350690	10855	HPSE	83309849	83381439	83335153	-15210	10855	HPSE	-	CD4_Tcells	Distal Intergenic	IRF9,POU6F2,IRF4,IRF5,GFI1,ZIM3,GABPA,ETV2::FOXI1,FOXO1::ELF1,FOXO1::FLI1	EWSR1-FLI1,VSX2,POU2F1,POU3F1,HOXC12,ZNF460,GABPA,FOXO1::ELK1,NR1D2	RELA,NFATC2,MAF,BRD4,TBX21,BCL6
chr4-89929528-89930141	chr4	89929528	89930141	22915	MMRN1	89858924	90039490	89951445	-21610	22915	MMRN1	+	CD4_Tcells	Intron	IRF9,ETV2,MEIS3,RUNX2,SIX1,ZIM3	FOSL2::JUND	BRD4,IRF4,ETS1,TBX21,JUNB
chr4-94339662-94340225	chr4	94339662	94340225	27306	HPGDS	94306717	94397366	94342865	2921	27306	HPGDS	-	CD4_Tcells	Intron	IRF9,ETV1,GABPA	EWSR1-FLI1,ZNF460,ZNF257,GABPA	NFKB1
chr4-152554043-152554733	chr4	152554043	152554733	100616193	MIR4453	152536347	152588926	152536428	17959	100616193	MIR4453	+	CD4_Tcells	Distal Intergenic	IRF9,TCF7L1,ZIM3,ETV1,GABPA	EWSR1-FLI1,JUN,TCF7L1,GABPA	BRD4,JUNB,TBX21,ETS1,MYB,IRF4,FOS,MAF,MED1,JUN,RELA,AFF4,BCL6
chr4-184280601-184281131	chr4	184280601	184281131	133121	ENPP6	184064298	184284571	184221230	-59635	133121	ENPP6	-	CD4_Tcells	Distal Intergenic	TCF7L2,SOX10,SNAI1,GFI1,ETV1,ETV2::FOXI1,FLI1::FOXI1	POU2F1,POU3F1,POU5F1,ZNF257,GRHL2
chr5-39185577-39186762	chr5	39185577	39186762	2533	FYB1	39138718	39319511	39203027	16857	2533	FYB1	-	CD4_Tcells	Intron	MEIS3,MGA,TBX15,SNAI1,ZIM3,ETV1,GABPA,ELK1::HOXB13	EWSR1-FLI1,ETV3,MGA,TBR1,TBX15,HOXA10,HOXC12,CDX4,ZNF460,ZNF257,GABPA,MAFK,ERF::FIGLA,ETV5::FIGLA	MAF,BRD4,TBX21,AFF4
chr5-87282213-87282771	chr5	87282213	87282771	5921	RASA1	87254017	87369873	87268944	13547	5921	RASA1	+	CD4_Tcells	Intron	ETV6,RUNX2,SOX10,ZIM3,ETV1,GABPA,RUNX3,ERF::HOXB13,ETV2::FOXI1,FLI1::FOXI1,FOXO1::ELF1,FOXO1::FLI1	ETV6,ZNF257,GABPA,ETV5::HOXA2,FLI1::DRGX,FOXO1::ELK1,HOXB2::ELK1	MYB,BRD4,GATA3,TBX21,MAF
chr5-95631894-95632568	chr5	95631894	95632568	285601	GPR150	95587718	95633416	95620078	12152	285601	GPR150	+	CD4_Tcells	Distal Intergenic	ETV2,ETV2::FOXI1,FLI1::FOXI1,FOXO1::ELF1,FOXO1::FLI1	TGIF2LX,ERF::FIGLA,FLI1::DRGX,FOXO1::ELK1,POU2F1::SOX2	NFATC2,ETS1,JUNB,BRD4,MAF,JUN,MYB,FOS,IRF4
chr5-134086230-134087465	chr5	134086230	134087465	6932	TCF7	134059923	134152344	134114711	-27863	6932	TCF7	+	CD4_Tcells	Distal Intergenic	MEIS3,RUNX2,SNAI1,SNAI3,SNAI2	EWSR1-FLI1,JUN,NR2C2,ZBTB18,UNCX,TBR1,FERD3L,SNAI3,LMX1B,HAND2,MYF5,HNF4G,MAFK	NFATC2,MYB,GATA3,ETS1,BRD4,MAF,IRF4,TBX21,FOS,BCL6,NFKB1,MED1,JUNB,JUN,RELA,AFF4
chr5-157159074-157159664	chr5	157159074	157159664	9443	MED7	157143059	157162641	157159019	-349	9443	MED7	-	CD4_Tcells	Intron	SOX10,RUNX3,TCF7	EWSR1-FLI1	JUNB,BRD4,BCL6,FOS,TBX21,NFATC2,MAF,MYB,GATA3
chr5-175652933-175653849	chr5	175652933	175653849	3274	HRH2	175589959	175739772	175658030	-4638	3274	HRH2	+	CD4_Tcells	Distal Intergenic	SOX10,GFI1	HOXC10,MAFK	JUN,ETS1,MED1,TBX21,MAF,MYB,NFATC2,IRF4,RELA,JUNB,AFF4,FOS,BRD4
chr6-444811-445541	chr6	444811	445541	3662	IRF4	364873	525121	393279	51896	3662	IRF4	+	CD4_Tcells	Distal Intergenic	RUNX2,IRF5,FOXK2,RUNX3,TCF7,FOXO1::FLI1	ETV5::FIGLA	BRD4,BCL6,MAF,MED1,MYB,ETS1,TBX21,RELA,AFF4
chr6-11727957-11728931	chr6	11727957	11728931	84830	ADTRP	11633418	11907904	11728557	112	84830	ADTRP	-	CD4_Tcells	Promoter	TCF7L2,ETV6,MGA,TBX15,SOX10,SNAI1,SNAI3,GFI1,ZIM3,TCF7	RORA,EWSR1-FLI1,NR2C2,ETV6,MGA,TBR1,TBX15,SNAI3,CEBPD,MAFK,ERF::FIGLA,ETV5::FIGLA,ZNF324	BRD4,MAF,TBX21,AFF4,BCL6,MED1,JUNB,MYB,RELA,ETS1,FOS,IRF4
chr6-11729077-11729636	chr6	11729077	11729636	84830	ADTRP	11633418	11907904	11728557	-798	84830	ADTRP	-	CD4_Tcells	Exon	ETV1,GABPA,ELK1::HOXB13,ERF::HOXB13	EWSR1-FLI1,ZNF257,GABPA	IRF4,GATA3,MYB,ETS1,BRD4,RELA,TBX21,JUNB,MAF,BCL6,MED1
chr6-16474571-16475381	chr6	16474571	16475381	2766	GMPR	16190069	16520018	16289945	185030	2766	GMPR	+	CD4_Tcells	Intron	TCF7L2,SOX10,TCF7L1,TCF7,FLI1::FOXI1,FOXO1::ELF1,FOXO1::FLI1	REL,TCF7L1,FOXO1::ELK1	BRD4,ETS1,TBX21,GATA3,BCL6,MAF,JUNB,AFF4,NFKB1,MYB,NFATC2,RELA
chr6-37507806-37508546	chr6	37507806	37508546	100505530	LINC02520	37503636	37531385	37507348	827	100505530	LINC02520	+	CD4_Tcells	Promoter	SOX10,SNAI1	TBR1,HES6,TGIF2LX	TBX21,BCL6,MAF
chr6-131442951-131444124	chr6	131442951	131444124	383	ARG1	131411788	131584309	131573144	-129606	383	ARG1	+	CD4_Tcells	Promoter	MGA,TBX15,SOX10,ZIM3,ETV1,GABPA,ETV2::FOXI1,FLI1::FOXI1,FOXO1::ELF1,FOXO1::FLI1	RORA,EWSR1-FLI1,ZBTB18,POU2F1,POU3F1,MGA,TBX15,FOSB::JUN,TGIF2LX,ZNF460,ZNF257,HAND2,GABPA,MAFK,FOXO1::ELK1	BRD4,IRF4,MAF,ETS1,BCL6,JUN,TBX21,RELA
chr6-135014210-135014843	chr6	135014210	135014843	10767	HBS1L	134966848	135142185	135027156	12629	10767	HBS1L	-	CD4_Tcells	Intron	ETV6,FLI1,ERF,ETS1,ETV2,SIX1,RUNX3,ELK1::HOXB13,ERF::HOXB13	ETV6,ZBTB18,UNCX,ETV3,ELK1,ZNF460,LMX1B,HAND2,FLI1::DRGX,HOXB2::ELK1,ELK3	ETS1,BRD4,MYB,GATA3,BCL6,TBX21,JUNB,IRF4,MAF,FOS
chr6-137363657-137364175	chr6	137363657	137364175	167826	OLIG3	137356850	137616616	137494250	130333	167826	OLIG3	-	CD4_Tcells	Distal Intergenic	TCF7L2,ETV6,FLI1,ERF,ETS1,ETV2,MEIS3,RUNX2,ETV1,GABPA,TCF7,ERF::HOXB13,ETV2::FOXI1,FOXO1::ELF1	REL,ETV6,HINFP,GABPA,GRHL2,FOXO1::ELK1,ZNF211	IRF4,JUN,BRD4,JUNB,ETS1,MYB,TBX21,MAF,AFF4
chr6-143539024-143540250	chr6	143539024	143540250	9749	PHACTR2	143524268	143549438	143536845	2791	9749	PHACTR2	+	CD4_Tcells	Intron	IRF4,SNAI1,SNAI3	EWSR1-FLI1,JUN,ESR2,FOSB::JUN,SNAI3,ZNF460,ATF2,ERF::FIGLA,ETV5::FIGLA	BCL6
chr6-143545676-143546413	chr6	143545676	143546413	9749	PHACTR2	143524268	143549438	143536845	9198	9749	PHACTR2	+	CD4_Tcells	Intron	TCF7L2,IRF9,IRF4,IRF5,ETV1,GABPA,TCF7,FOXO1::ELF1	FOSL2::JUND,GABPA,GRHL2,HNF4G,FOXO1::ELK1	BRD4,JUNB,TBX21,FOS,BCL6
chr6-149494830-149495797	chr6	149494830	149495797	340152	ZC3H12D	149428549	149501462	149485061	-10251	340152	ZC3H12D	-	CD4_Tcells	Distal Intergenic	IRF9,SNAI1,ETV1,MYOD1,SNAI2,ETV2::FOXI1,FLI1::FOXI1,FOXO1::ELF1,FOXO1::FLI1	HOXC10,ZNF460,ZNF257,MAFK,FOXO1::ELK1,POU2F1::SOX2	TBX21,MAF,IRF4,RELA,MED1,MYB,JUNB,NFKB1,AFF4,NFATC2,BRD4,FOS
chr6-149508432-149508953	chr6	149508432	149508953	85313	PPIL4	149501463	149556166	149517864	9171	85313	PPIL4	-	CD4_Tcells	Intron	FLI1,ERF,ETS1,ETV2,SOX10,ETV1,GABPA,RUNX3,TCF7,ETV2::FOXI1,FLI1::FOXI1,FOXO1::ELF1,FOXO1::FLI1	PRRX1,UNCX,LMX1B,GABPA,ETV5::FIGLA,FOXO1::ELK1,ZNF324,ESX1	NFATC2,FOS,ETS1,MAF,BRD4,IRF4,JUNB,MED1,RELA,TBX21,MYB,AFF4
chr6-166942713-166943238	chr6	166942713	166943238	8635	RNASET2	166919751	166977551	166943239	263	8635	RNASET2	-	CD4_Tcells	5' UTR	POU6F2,ZIM3	ESR2,PRRX1,UNCX,HOXA10,GRHL2,ZNF211,ESX1	NFATC2,JUNB,MAF,MYB,BCL6,GATA3,BRD4,RELA,FOS,AFF4,TBX21
chr7-1925867-1926461	chr7	1925867	1926461	8379	MAD1L1	1858505	2236243	1940549	14384	8379	MAD1L1	-	CD4_Tcells	Intron	TCF7L2,IRF9,RUNX2,IRF4,IRF5,ZIM3,RUNX3	EWSR1-FLI1,ZNF257	MYB,ETS1,BRD4,GATA3,TBX21,MAF,IRF4
chr7-106704187-106704950	chr7	106704187	106704950	168455	CCDC71L	106473662	106763137	106660996	-43571	168455	CCDC71L	-	CD4_Tcells	Intron	POU6F1,ERF,ETS1,POU6F2,RUNX2,SIX1,GFI1,ETV1,GABPA,ELK1::HOXB13,ETV2::FOXI1,FLI1::FOXI1,FOXO1::ELF1,FOXO1::FLI1	EWSR1-FLI1,JUN,PRRX1,UNCX,ONECUT3,ZNF460,ATF2,GABPA,GRHL2,FOXO1::ELK1,HOXB2::ELK1,ESX1	BRD4,ETS1,TBX21
chr7-140376096-140376747	chr7	140376096	140376747	84255	SLC37A3	140257431	140401296	140382474	6052	84255	SLC37A3	-	CD4_Tcells	Intron	ETV6,FLI1,IRF9,ERF,ETS1,ETV2,MEIS3,SOX10,IRF4,IRF5,ZIM3,ETV1,GABPA,ETV2::FOXI1,FLI1::FOXI1	ETV6,POU5F1,GABPA,ZNF324	IRF4,MAF,MYB,BRD4,NFKB1,JUNB,ETS1,TBX21
chr7-142636577-142637706	chr7	142636577	142637706	100463482	MTRNR2L6	142462166	142707467	142666272	-29130	100463482	MTRNR2L6	+	CD4_Tcells	Exon	TCF7L2,IRF9,POU6F2,SOX10,IRF4,IRF5,ZIM3,FOXK2,TCF7	ESR2,ONECUT3,NR1I2,ZNF257,MYF5,NR1D2	NFATC2,JUNB,BRD4
chr7-148912985-148913734	chr7	148912985	148913734	2146	EZH2	148770912	148923818	148884321	-29037	2146	EZH2	-	CD4_Tcells	Distal Intergenic	TCF7L2,SNAI3,SNAI2,TCF7	CDX4,SNAI3	NFATC2,JUNB,MAF,MYB,BCL6,TBX21,BRD4,FOS,MED1,RELA,NFKB1,JUN,AFF4
chr7-152144533-152145346	chr7	152144533	152145346	58508	KMT2C	152134126	152449895	152155005	10065	58508	KMT2C	-	CD4_Tcells	3' UTR	ETV6,FLI1,ERF,ETS1,ETV2,MGA,TBX15,ETV1,FOXK2,GABPA,ELK1::HOXB13,ERF::HOXB13,ETV2::FOXI1,FLI1::FOXI1,FOXO1::ELF1,FOXO1::FLI1	EWSR1-FLI1,ETV6,ETV3,MGA,TBX15,ELK1,NR1I2,GABPA,ERF::FIGLA,ETV5::FIGLA,FOXO1::ELK1,ELK3	ETS1,MYB,TBX21,IRF4,MAF,BRD4
chr7-158812554-158813176	chr7	158812554	158813176	57488	ESYT2	158724524	158843415	158827641	14775	57488	ESYT2	-	CD4_Tcells	Intron	FLI1,IRF9,ERF,ETS1,ETV2,MGA,TBX15,ETV1,RUNX3,ETV2::FOXI1,FLI1::FOXI1,FOXO1::ELF1	ZBTB18,MGA,TBX15,HOXA10,POU5F1,CDX4,ETV5::FIGLA,FOXO1::ELK1	MYB,MAF,BRD4,ETS1,IRF4,TBX21,RELA,AFF4
chr8-2130833-2131694	chr8	2130833	2131694	9172	MYOM2	2079189	2593568	2127797	3465	9172	MYOM2	+	CD4_Tcells	Exon	ETV6,FLI1,ERF,ETS1,MGA,TBX15,TCF7L1,ZIM3,ETV1,GABPA,ETV2::FOXI1,FLI1::FOXI1,FOXO1::ELF1,FOXO1::FLI1	RORA,ETV6,ETV3,MGA,TBX15,FOSL2::JUND,TCF7L1,GABPA,HLF,MAFK,MXI1	NFATC2,JUNB,ETS1,TBX21,BRD4,FOS
chr8-19496508-19498061	chr8	19496508	19498061	55790	CSGALNACT1	19429501	19787584	19495191	-2092	55790	CSGALNACT1	-	CD4_Tcells	Intron	POU6F2,ZIM3,MYOD1,RUNX3,SNAI2	EWSR1-FLI1,ZBTB18,TBX19,HOXA10,ZNF460,ZNF257,MYF5,ETV5::FIGLA	TBX21,BRD4,IRF4,MAF,ETS1,GATA3,MYB,BCL6,JUNB,NFATC2,JUN,FOS
chr8-38368401-38368975	chr8	38368401	38368975	54904	NSD3	38274727	38384239	38380821	12132	54904	NSD3	-	CD4_Tcells	Intron	ZIM3,RUNX3	HLF	JUNB,NFATC2,MYB,GATA3,TBX21,BRD4,MAF,RELA,AFF4,MED1
chr8-42153969-42154543	chr8	42153969	42154543	10947	AP3M2	42102469	42174264	42154131	124	10947	AP3M2	+	CD4_Tcells	Promoter	TCF7,FOXO1::FLI1	ONECUT3,HOXA10,ATF2,GRHL2,POU2F1::SOX2	BCL6,MYB,TBX21,BRD4,AFF4,GATA3,IRF4,ETS1,RELA
chr8-42177508-42178147	chr8	42177508	42178147	5327	PLAT	42174265	42239513	42180764	2936	5327	PLAT	-	CD4_Tcells	Intron	IRF9,SOX10,IRF4		MAF,MYB,TBX21,IRF4,BRD4,RELA
chr8-78445096-78445629	chr8	78445096	78445629	5569	PKIA	77758592	78628639	78516139	-70776	5569	PKIA	+	CD4_Tcells	Intron	SOX10,FOXK2	FERD3L,ETV5::HOXA2	BRD4
chr8-103336375-103336928	chr8	103336375	103336928	115908	CTHRC1	103335735	103389920	103371515	-34863	115908	CTHRC1	+	CD4_Tcells	Distal Intergenic	TCF7L2,RUNX2,TCF7L1,GFI1,ETV1,GABPA,RUNX3,SNAI2,TCF7,FOXO1::FLI1	REL,TCF7L1,GABPA
chr8-143461118-143462832	chr8	143461118	143462832	389692	MAFA	143404872	143469123	143430406	-31568	389692	MAFA	-	CD4_Tcells	Intron	TCF7L2,ETV6,TCF7L1,SOHLH2,ZIM3,TCF7,FLI1::FOXI1,FOXO1::ELF1,FOXO1::FLI1	EWSR1-FLI1,ESR2,ETV6,HEY1,HOXA10,POU5F1,FOSL2::JUND,TCF7L1,CDX4,ZNF257,MYF5,GRHL2,MAFK,FOXO1::ELK1,ZNF211,CLOCK
chr9-5671906-5672436	chr9	5671906	5672436	57589	RIC1	5569798	5801523	5656654	15516	57589	RIC1	+	CD4_Tcells	Intron	TCF7L2,POU6F2,RUNX2,SNAI2,TCF7
chr9-20314888-20315414	chr9	20314888	20315414	4300	MLLT3	20075249	20396862	20363569	48417	4300	MLLT3	-	CD4_Tcells	Distal Intergenic	MYOD1	NR2C2,ONECUT3,HLF
chr9-120846237-120846959	chr9	120846237	120846959	253039	CUTALP	120842991	120853639	120846599	0	253039	CUTALP	+	CD4_Tcells	Promoter	GFI1,ZIM3,ETV1,TCF7,ETV2::FOXI1,FLI1::FOXI1,FOXO1::ELF1,FOXO1::FLI1	EWSR1-FLI1,NR2C2,ZNF460,HAND2,FLI1::DRGX
chr9-128030846-128031538	chr9	128030846	128031538	203245	NAIF1	128023399	128067761	128066284	35091	203245	NAIF1	-	CD4_Tcells	Distal Intergenic	IRF9,MGA,TBX15,SNAI1,SNAI3,RUNX3,SNAI2	POU2F1,POU3F1,MGA,TBX15,HOXA10,POU5F1,CDX4,SNAI3,ZNF460,ZNF257,HNF4G
chr9-131500205-131500844	chr9	131500205	131500844	10585	POMT1	131496834	131523632	131502902	-2377	10585	POMT1	+	CD4_Tcells	Promoter	TCF7L2,ETV6,TCF7L1,ETV1,GABPA,TCF7	EWSR1-FLI1,NR2C2,ETV6,HOXC10,HOXC12,TCF7L1,MAFA,HAND2,GABPA,MAFK,NR1D2
chr10-5564031-5565016	chr10	5564031	5565016	100132159	CALML3-AS1	5525126	5584029	5526246	-38276	100132159	CALML3-AS1	-	CD4_Tcells	Exon	TCF7L2,ETV6,RUNX2,MGA,TBX15,SOHLH2,ETV1,GABPA,RUNX3,TCF7,ELK1::HOXB13,ERF::HOXB13	EWSR1-FLI1,ETV6,MGA,TBX15,POU5F1,FOSL2::JUND,HES6,ZNF257,GABPA,MXI1,ETV5::HOXA2,FLI1::DRGX,HOXB2::ELK1	JUNB,BRD4,TBX21,IRF4,MAF,RELA,MYB,ETS1,GATA3
chr10-6062091-6062838	chr10	6062091	6062838	3559	IL2RA	6002095	6075656	6062325	-138	3559	IL2RA	-	CD4_Tcells	Promoter	ERF,ETV1,GABPA,FOXO1::ELF1	REL,HINFP,POU2F1,POU3F1,GABPA,GRHL2,HNF4G,ERF::FIGLA,ETV5::FIGLA,FOXO1::ELK1	IRF4,JUN,BRD4,MAF,MED1,RELA,ETS1,TBX21,AFF4,JUNB,MYB,NFKB1,FOS
chr10-8136630-8138133	chr10	8136630	8138133	2625	GATA3	7936055	8159601	8058399	78981	2625	GATA3	+	CD4_Tcells	Distal Intergenic	MEIS3,SIX1,SOX10,SNAI1,SNAI3,SOHLH2,ETV1,GABPA,MYOD1,SNAI2,ETV2::FOXI1,FLI1::FOXI1,FOXO1::ELF1	EWSR1-FLI1,JUN,NR2C2,ESR2,ZBTB18,HEY1,FERD3L,SNAI3,ZNF257,HAND2,MYF5,GABPA,GRHL2,ERF::FIGLA,ETV5::FIGLA,FOXO1::ELK1,CLOCK	ETS1,MAF,IRF4,MYB,BRD4,TBX21,JUNB,RELA
chr10-11235703-11236696	chr10	11235703	11236696	10659	CELF2	11135268	11348880	11165486	70712	10659	CELF2	+	CD4_Tcells	Intron	TCF7L2,POU6F1,POU6F2,RUNX2,TCF7L1,TCF7	REL,PRRX1,UNCX,POU2F1,HOXC10,POU5F1,TCF7L1,BARX2,MAFK,ESX1	NFATC2,JUNB,FOS,NFKB1,TBX21,RELA,BRD4,MAF,MED1,AFF4,ETS1,GATA3,IRF4,MYB
chr10-21740929-21741449	chr10	21740929	21741449	8028	MLLT10	21530267	21767242	21673578	67610	8028	MLLT10	+	CD4_Tcells	Intron	ETV6,FLI1,ERF,ETS1,ETV2,MEIS3,POU6F2,GFI1,ZIM3,ETV1,FOXK2,GABPA,ETV2::FOXI1	EWSR1-FLI1,ETV6,POU2F1,GABPA,HLF,FOXO1::ELK1	ETS1,BRD4,TBX21
chr10-23340860-23341425	chr10	23340860	23341425	256815	C10orf67	23268146	23369125	23343964	2821	256815	C10orf67	-	CD4_Tcells	Intron	ETV6,POU6F2,ETV1,GABPA,TCF7	JUN,ETV6,VSX2,GABPA,ETV5::HOXA2,FLI1::DRGX	JUNB,FOS,NFATC2,BRD4,MAF,RELA
chr10-23362688-23363915	chr10	23362688	23363915	256815	C10orf67	23268146	23369125	23344845	-18455	256815	C10orf67	-	CD4_Tcells	Distal Intergenic	TCF7L2,IRF9,ETV2,MGA,TBX15,IRF4,TCF7L1,ZIM3,TCF7,ERF::HOXB13,ETV2::FOXI1,FLI1::FOXI1,FOXO1::ELF1,FOXO1::FLI1	EWSR1-FLI1,ESR2,MGA,TBR1,TBX15,FOSL2::JUND,TCF7L1,BARX2,FERD3L,ZNF460,ZNF257,HAND2,HNF4G,MAFK,FLI1::DRGX,FOXO1::ELK1,ZNF324	IRF4,MYB,TBX21,MAF,JUN,ETS1,JUNB,BRD4,RELA
chr10-98137967-98138485	chr10	98137967	98138485	27291	R3HCC1L	98082727	98215768	98134671	3554	27291	R3HCC1L	+	CD4_Tcells	Intron		TBR1,BARX2,MAFK,ZNF211	NFATC2,IRF4,JUNB,TBX21
chr11-61026078-61026780	chr11	61026078	61026780	923	CD6	60962106	61059649	61016903	9525	923	CD6	+	CD4_Tcells	Distal Intergenic	ETV6,RUNX2,SNAI1,SNAI3,MYOD1,SNAI2	RORA,EWSR1-FLI1,ESR2,ETV6,SNAI3,ZNF460,ZNF257,ELK3	IRF4,BCL6,TBX21,ETS1,GATA3,MYB,NFATC2,MAF,RELA,JUNB,BRD4
chr11-61082266-61084206	chr11	61082266	61084206	921	CD5	61059650	61131822	61102395	-19158	921	CD5	+	CD4_Tcells	Distal Intergenic	IRF9,MEIS3,MGA,TBX15,IRF4,SNAI1,SNAI3,SOHLH2,GFI1,ZIM3,FOXK2,MYOD1,RUNX3,SNAI2,FLI1::FOXI1	RORA,NR2C2,ZBTB18,MGA,TBR1,TBX15,FERD3L,HES6,MAF,MAFA,SNAI3,ZNF460,HAND2,MYF5,GRHL2,HNF4G,ETV5::FIGLA,ZNF324	MYB,BRD4,JUNB,MAF,ETS1,TBX21,IRF4,BCL6,NFKB1,JUN,RELA
chr11-105070139-105070789	chr11	105070139	105070789	114769	CARD16	105040279	105120356	105045376	-25087	114769	CARD16	-	CD4_Tcells	Exon	FLI1,ERF,ETS1,ETV2,MEIS3,ETV1,GABPA,ETV2::FOXI1,FLI1::FOXI1	ONECUT3,POU3F1,TBX19,HOXC12,POU5F1,HOXC8,GABPA,MAFK,FOXO1::ELK1,POU2F1::SOX2
chr11-123070353-123070910	chr11	123070353	123070910	3312	HSPA8	123020409	123073483	123063230	-7400	3312	HSPA8	-	CD4_Tcells	3' UTR	TCF7L2,TCF7	POU2F1,POU3F1,POU5F1,POU2F1::SOX2	GATA3,ETS1,MAF,BRD4,BCL6,TBX21,JUN,IRF4,MYB
chr12-3962558-3963070	chr12	3962558	3963070	57097	PARP11	3793397	4073610	3873448	-89365	57097	PARP11	-	CD4_Tcells	Distal Intergenic	GFI1,ZIM3	ZNF460,MXI1,CLOCK	MYB,GATA3,ETS1,BRD4,MAF,TBX21
chr12-4506808-4507350	chr12	4506808	4507350	57102	C12orf4	4477483	4538653	4509350	2270	57102	C12orf4	-	CD4_Tcells	Intron	ETV6,ERF,ETS1,MEIS3,RUNX2,SNAI1,SNAI3,ETV1,FOXK2,GABPA,MYOD1,RUNX3,SNAI2,ELK1::HOXB13,ERF::HOXB13,ETV2::FOXI1	EWSR1-FLI1,ETV6,SNAI3,TGIF2LX,GABPA,HNF4G,FLI1::DRGX,FOXO1::ELK1,HOXB2::ELK1	JUNB,ETS1,BRD4,MYB,FOS,MAF,AFF4,BCL6,TBX21,RELA,JUN,IRF4
chr12-6786655-6787184	chr12	6786655	6787184	920	CD4	6782155	6817799	6786858	60	920	CD4	+	CD4_Tcells	Promoter	ZIM3	EWSR1-FLI1,POU3F1,POU5F1	BCL6,GATA3,MAF,ETS1,BRD4
chr12-6790691-6791252	chr12	6790691	6791252	920	CD4	6782155	6817799	6789568	1402	920	CD4	+	CD4_Tcells	Intron	TCF7L2	FERD3L	MAF,BRD4
chr12-68290117-68290671	chr12	68290117	68290671	56890	MDM1	68278240	68382517	68302872	12477	56890	MDM1	-	CD4_Tcells	Intron	TCF7L2,FLI1,ETV2,TCF7L1,ETV1,GABPA,TCF7	RORA,POU5F1,TCF7L1,ZNF460,GABPA,MAFK,ETV5::HOXA2,ZNF324,MNX1	JUN,TBX21,GATA3,JUNB,BRD4,MAF,MYB,FOS,IRF4,RELA,AFF4
chr12-92046752-92047783	chr12	92046752	92047783	256021	LINC01619	91588264	92144073	92028257	-19009	256021	LINC01619	-	CD4_Tcells	Intron	IRF9,MEIS3,SIX1,IRF4,IRF5	NR2C2,MXI1,MNX1	GATA3,MAF,BRD4
chr12-92210040-92210647	chr12	92210040	92210647	694	BTG1	92144074	92283714	92145897	-64445	694	BTG1	-	CD4_Tcells	Intron	TCF7L1,ZIM3,MYOD1,SNAI2,TCF7	ZBTB18,TCF7L1,BARX2,ZNF460,ZNF257,MAFK,MXI1,POU2F1::SOX2	BRD4,MYB,GATA3,IRF4,MAF,JUNB,TBX21,FOS
chr12-94007634-94008223	chr12	94007634	94008223	10154	PLXNC1	93998692	94289154	94148723	-140794	10154	PLXNC1	+	CD4_Tcells	Distal Intergenic	FOXK2	NR2C2,ZNF324
chr12-108568734-108569249	chr12	108568734	108569249	23479	ISCU	108561986	108582933	108567858	1132	23479	ISCU	+	CD4_Tcells	3' UTR	ETV6,RUNX2,SNAI1,SNAI3,GABPA,MYOD1	EWSR1-FLI1,ETV6,ETV3,FERD3L,SNAI3,ZNF460,ATF2,MYF5,GABPA,ERF::FIGLA,ETV5::FIGLA	JUN,BRD4,ETS1,MYB,MAF,IRF4,BCL6,TBX21,RELA,AFF4
chr13-42396373-42396934	chr13	42396373	42396934	11215	AKAP11	42243331	42417444	42272153	124499	11215	AKAP11	+	CD4_Tcells	Intron	SOX10,IRF5		BRD4,MAF,IRF4,BCL6,TBX21,MYB,AFF4
chr13-74230792-74231615	chr13	74230792	74231615	11278	KLF12	73779647	74276539	74133905	-97297	11278	KLF12	-	CD4_Tcells	Promoter	MEIS3,SIX1,GABPA,FLI1::FOXI1,FOXO1::ELF1,FOXO1::FLI1	ETV3,POU2F1,FERD3L,ZNF257,GABPA,MAFK,FOXO1::ELK1,ZNF211	ETS1,BRD4,IRF4,NFATC2,TBX21,MAF
chr13-75317977-75318857	chr13	75317977	75318857	9882	TBC1D4	75276651	75506309	75316552	-1864	9882	TBC1D4	-	CD4_Tcells	Intron	POU6F1,IRF9,SOX10,IRF5,SNAI1,SNAI3,ZIM3,ETV1,GABPA,ERF::HOXB13	PRRX1,UNCX,ONECUT3,SNAI3,GABPA,MAFK,ETV5::HOXA2,FLI1::DRGX,POU2F1::SOX2,ESX1	MAF,BRD4,TBX21,AFF4,IRF4,NFATC2,JUNB,FOS
chr13-98517421-98518127	chr13	98517421	98518127	8428	STK24	98447434	98652253	98519267	1492	8428	STK24	-	CD4_Tcells	Intron	TCF7L2,IRF9,POU6F2,IRF4,TCF7L1,ZIM3,TCF7,FOXO1::FLI1	RORA,EWSR1-FLI1,TCF7L1,FERD3L,TGIF2LX,ZNF460,ZNF257,MAFK,MXI1,ZNF211	IRF4,RELA,TBX21,MYB,MAF,AFF4,JUNB,NFATC2,BRD4,FOS
chr13-99352788-99353509	chr13	99352788	99353509	693208	MIR623	99335420	99361959	99356131	-2982	693208	MIR623	+	CD4_Tcells	Intron	SOHLH2,ZIM3,ETV1	HEY1,HOXA10,HOXC10,HOXC12,CDX4,MAFK,ERF::FIGLA,ZNF324,CLOCK	BRD4,BCL6,MYB,GATA3
chr15-38688594-38689252	chr15	38688594	38689252	400359	C15orf53	38631087	38973641	38696598	-7674	400359	C15orf53	+	CD4_Tcells	Exon	SOX10,ETV1,GABPA,RUNX3	HOXA10,FOSL2::JUND,FERD3L,GABPA,MAFK	TBX21,GATA3,BRD4,MYB,IRF4,JUN
chr15-60580471-60581044	chr15	60580471	60581044	6095	RORA	60495629	60654516	60592517	11759	6095	RORA	-	CD4_Tcells	Intron	TCF7L2,IRF9,SIX1,SOX10,TCF7L1,ETV1,GABPA,TCF7	TCF7L1,GABPA	IRF4,TBX21,ETS1,NFKB1,JUNB,MAF,BCL6,MYB,BRD4
chr15-60720728-60721364	chr15	60720728	60721364	6095	RORA	60693990	61543056	60706352	-14693	6095	RORA	-	CD4_Tcells	Intron	POU6F2,SOX10,IRF5,ZIM3,ETV1,GABPA,RUNX3,ELK1::HOXB13,ERF::HOXB13	RORA,JUN,FOSB::JUN,FOSL2::JUND,ATF2,GABPA,MXI1,FLI1::DRGX,HOXB2::ELK1,ZNF324	JUNB,IRF4,BRD4,FOS,NFATC2,MAF,RELA,ETS1,MED1,NFKB1,TBX21,JUN,MYB,BCL6,AFF4
chr15-65887545-65888074	chr15	65887545	65888074	8766	RAB11A	65792371	65889892	65870013	17795	8766	RAB11A	+	CD4_Tcells	3' UTR	RUNX2,ZIM3,RUNX3	HOXA10,POU5F1,FOSB::JUN,CDX4,HNF4G	NFATC2,JUNB,TBX21,RELA,BRD4,MAF,AFF4,MYB,IRF4
chr15-88627409-88627938	chr15	88627409	88627938	64782	AEN	88616561	88631382	88626612	1060	64782	AEN	+	CD4_Tcells	Exon	TCF7L2,ETV6,FLI1,ERF,ETS1,ETV2,SIX1,ZIM3,ETV1,GABPA,TCF7,ETV2::FOXI1,FLI1::FOXI1	ETV6,ETV3,TBR1,POU5F1,MYF5,GABPA	NFATC2,ETS1,BRD4,RELA,MYB,JUNB,IRF4,MAF,TBX21,BCL6
chr15-90539755-90540362	chr15	90539755	90540362	64784	CRTC3	90513320	90649043	90539617	440	64784	CRTC3	+	CD4_Tcells	Promoter	TCF7L2,FLI1,IRF9,ETS1,ETV2,MGA,TBX15,IRF4,IRF5,TCF7L1,TCF7	REL,HINFP,MGA,TBX15,TCF7L1,ZNF211	BRD4,BCL6,TBX21,MAF,MYB,JUNB
chr15-90574417-90574949	chr15	90574417	90574949	64784	CRTC3	90513320	90649043	90593712	-19028	64784	CRTC3	+	CD4_Tcells	Intron	IRF9,TCF7L1,ZIM3,ETV1,ETV2::FOXI1,FLI1::FOXI1,FOXO1::ELF1,FOXO1::FLI1	TCF7L1,ZNF460,FOXO1::ELK1	IRF4,ETS1,MYB,BCL6,BRD4,MAF,TBX21
chr16-31952187-31952701	chr16	31952187	31952701	10308	ZNF267	31793533	32063392	31874066	78377	10308	ZNF267	+	CD4_Tcells	Exon	MGA,TBX15,FOXK2,MYOD1,SNAI2	MGA,TBX15,LMX1B,ERF::FIGLA,ETV5::FIGLA
chr16-50780882-50782000	chr16	50780882	50782000	1540	CYLD	50742533	50905687	50776201	5239	1540	CYLD	+	CD4_Tcells	Exon	POU6F2,SIX1,SNAI1,SNAI3,ETV1,FOXK2,GABPA,MYOD1,SNAI2,ETV2::FOXI1,FLI1::FOXI1,FOXO1::ELF1,FOXO1::FLI1	REL,EWSR1-FLI1,TBR1,SNAI3,ZNF460,ZNF257,GABPA,GRHL2,FOXO1::ELK1,ZNF211,ZNF324	BRD4,TBX21
chr16-80656521-80657062	chr16	80656521	80657062	124359	CDYL2	80602995	80820059	80639736	-17054	124359	CDYL2	-	CD4_Tcells	Intron	SOHLH2,ZIM3,FOXO1::ELF1	REL,EWSR1-FLI1,ZNF460	ETS1,GATA3,BRD4,MYB,TBX21,MAF,IRF4
chr17-8939326-8939928	chr17	8939326	8939928	23533	PIK3R5	8874774	8993627	8965615	25987	23533	PIK3R5	-	CD4_Tcells	Intron	RUNX2,ZIM3,MYOD1,RUNX3,SNAI2	ZBTB18,HEY1,FERD3L,HES6,ZNF460,HAND2,CLOCK	TBX21,IRF4,MYB,GATA3,MAF,JUN,BRD4
chr17-30332014-30332654	chr17	30332014	30332654	388364	TMIGD1	30313052	30356482	30334047	1712	388364	TMIGD1	-	CD4_Tcells	5' UTR	TCF7L2,FLI1,IRF9,ERF,ETS1,ETV2,POU6F2,RUNX2,TCF7L1,ZIM3,ETV1,GABPA,TCF7,FLI1::FOXI1,FOXO1::ELF1,FOXO1::FLI1	UNCX,POU2F1,POU3F1,POU5F1,FOSL2::JUND,TCF7L1,LMX1B,GABPA,HNF4G,FOXO1::ELK1	NFATC2,JUNB,FOS,BRD4,TBX21,MAF,MYB,NFKB1,ETS1,IRF4
chr17-51096073-51096614	chr17	51096073	51096614	9043	SPAG9	50921670	51137200	51079622	-16720	9043	SPAG9	-	CD4_Tcells	Intron	ETV6,MGA,TBX15,IRF5,SNAI1,SNAI3,GFI1,ZIM3,ETV1,GABPA,RUNX3,SNAI2,FOXO1::ELF1,FOXO1::FLI1	EWSR1-FLI1,ETV6,MGA,TBR1,TBX15,MAF,MAFA,SNAI3,ZNF460,GABPA,MAFK	IRF4,TBX21,MAF,BRD4
chr17-76179702-76180318	chr17	76179702	76180318	114804	RNF157	76154985	76252787	76167082	-12927	114804	RNF157	-	CD4_Tcells	Intron	IRF9,SOX10,ZIM3,ETV1,GABPA,ETV2::FOXI1,FLI1::FOXI1,FOXO1::ELF1,FOXO1::FLI1	EWSR1-FLI1,NR2C2,TBX19,ZNF257,GABPA,FLI1::DRGX,FOXO1::ELK1,HOXB2::ELK1	MAF,BRD4,MYB,ETS1,MED1,AFF4,BCL6,TBX21
chr17-76191827-76192388	chr17	76191827	76192388	114804	RNF157	76154985	76252787	76167082	-25024	114804	RNF157	-	CD4_Tcells	Intron	ETV2,IRF4,IRF5,TCF7,ETV2::FOXI1,FLI1::FOXI1,FOXO1::ELF1,FOXO1::FLI1	REL,NR2C2,POU3F1,POU5F1,ZNF257,ERF::FIGLA,ETV5::FIGLA,FOXO1::ELK1,POU2F1::SOX2	MAF,IRF4,BRD4,JUNB,NFATC2,MYB,FOS,TBX21,ETS1,MED1,BCL6,AFF4,RELA
chr17-76199421-76199944	chr17	76199421	76199944	114804	RNF157	76154985	76252787	76167082	-32599	114804	RNF157	-	CD4_Tcells	Intron	IRF4,IRF5	JUN,ESR2,ZBTB18,ZNF460,ATF2,MYF5,GRHL2	ETS1,NFKB1,GATA3,BRD4,MYB,FOS,JUNB,MAF,IRF4,JUN,RELA,TBX21,NFATC2
chr17-76752900-76753935	chr17	76752900	76753935	79157	MFSD11	76737438	76786070	76747931	5485	79157	MFSD11	+	CD4_Tcells	Exon	IRF9,MEIS3,SIX1,IRF4,IRF5,SNAI1,SNAI3,ZIM3,MYOD1,SNAI2	EWSR1-FLI1,POU2F1,POU3F1,POU5F1,SNAI3,TGIF2LX,ZNF460,ZNF257,MAFK	IRF4,MYB,MAF,ETS1,BRD4,NFATC2
chr18-9091116-9091658	chr18	9091116	9091658	4729	NDUFV2	8957738	9131427	9102630	-11242	4729	NDUFV2	+	CD4_Tcells	Distal Intergenic	ETV6,SIX1,ETV1,GABPA,TCF7	EWSR1-FLI1,JUN,ESR2,ETV6,HOXC10,ATF2,GABPA,GRHL2,MAFK,FOXO1::ELK1,POU2F1::SOX2,ZNF324,NR1D2	BRD4,IRF4,MAF,AFF4,ETS1,BCL6,JUN,MYB,GATA3,TBX21,JUNB,RELA
chr18-69955020-69955548	chr18	69955020	69955548	10666	CD226	69817398	69990838	69956670	1385	10666	CD226	-	CD4_Tcells	Intron	ETV1	EWSR1-FLI1,NR2C2,POU2F1,POU5F1,ZNF257,HAND2,ZNF324	MAF,BRD4
chr18-69955947-69957879	chr18	69955947	69957879	10666	CD226	69817398	69990838	69956924	10	10666	CD226	-	CD4_Tcells	Promoter	TCF7L2,MEIS3,POU6F2,MGA,TBX15,SOX10,SNAI1,GFI1,FOXK2,GABPA,MYOD1,TCF7,ERF::HOXB13,ETV2::FOXI1,FLI1::FOXI1,FOXO1::ELF1,FOXO1::FLI1	EWSR1-FLI1,NR2C2,PRRX1,UNCX,ONECUT3,ETV3,POU3F1,MGA,TBX15,HOXC12,HES6,TGIF2LX,LMX1B,HAND2,GABPA,MAFK,MXI1,ERF::FIGLA,ETV5::FIGLA,FOXO1::ELK1,POU2F1::SOX2,ESX1	BRD4,BCL6,TBX21,MYB,IRF4,MAF,JUNB,GATA3
chr18-69967940-69968469	chr18	69967940	69968469	10666	CD226	69817398	69990838	69961803	-6400	10666	CD226	-	CD4_Tcells	Distal Intergenic	POU6F2,ETV1,GABPA	ZNF460,MYF5,GABPA,FOXO1::ELK1	MYB,TBX21,IRF4,BRD4
chr19-19817306-19817856	chr19	19817306	19817856	440515	ZNF506	19799053	19821749	19821692	4110	440515	ZNF506	-	CD4_Tcells	Intron	TCF7L2,ETV6,ETV1,GABPA,MYOD1,RUNX3,ELK1::HOXB13,ERF::HOXB13	REL,ETV6,GABPA,HNF4G,MAFK,ETV5::HOXA2,FLI1::DRGX,HOXB2::ELK1,POU2F1::SOX2	NFATC2,MAF,IRF4,JUNB,MYB
chr19-29831045-29831632	chr19	29831045	29831632	898	CCNE1	29763844	29867771	29811898	19439	898	CCNE1	+	CD4_Tcells	Distal Intergenic	SNAI1,SNAI3,MYOD1,SNAI2	SNAI3,ZNF460,ERF::FIGLA,ETV5::FIGLA	MAF,BRD4,IRF4,ETS1,TBX21,MYB
chr20-3157274-3157819	chr20	3157274	3157819	22888	UBOX5	3122301	3159886	3159876	2329	22888	UBOX5	-	CD4_Tcells	Intron	GABPA,FOXO1::ELF1	REL,TBX19,GABPA,MAFK,FOXO1::ELK1,ZNF324	BRD4,MAF,ETS1,JUNB,IRF4,FOS
chr20-21548198-21548795	chr20	21548198	21548795	101929625	LINC01727	21542002	21658114	21569976	-21479	101929625	LINC01727	+	CD4_Tcells	Distal Intergenic	ERF,ETS1,ETV2,RUNX2,ETV1,GABPA,RUNX3,ERF::HOXB13,ETV2::FOXI1,FLI1::FOXI1,FOXO1::ELF1,FOXO1::FLI1	HOXA10,CDX4,GABPA,FOXO1::ELK1,HOXB2::ELK1	NFATC2,MAF,MYB,BRD4,JUNB,TBX21,ETS1,FOS,AFF4,NFKB1,RELA,BCL6
chr20-21557157-21558106	chr20	21557157	21558106	101929625	LINC01727	21542002	21658114	21569976	-12344	101929625	LINC01727	+	CD4_Tcells	Promoter	MGA,TBX15,SNAI1,SNAI3,SNAI2	EWSR1-FLI1,JUN,MGA,TBX15,SNAI3,ATF2,GRHL2,NR1D2	MAF,BRD4,BCL6,TBX21,MYB
chr20-37014898-37015674	chr20	37014898	37015674	5933	RBL1	37009950	37102329	37068055	52768	5933	RBL1	-	CD4_Tcells	Intron	ETV6,FLI1,IRF9,ERF,ETS1,ETV2,SNAI1,ZIM3,ETV1,GABPA,MYOD1,SNAI2,ELK1::HOXB13,ERF::HOXB13,ETV2::FOXI1,FLI1::FOXI1,FOXO1::ELF1,FOXO1::FLI1	EWSR1-FLI1,NR2C2,ETV6,ETV3,FERD3L,ZNF460,ZNF257,ATF2,GABPA,MAFK,FOXO1::ELK1,NR1D2	ETS1,GATA3,MYB,MAF,TBX21,BRD4
chr21-14630416-14631257	chr21	14630416	14631257	64092	SAMSN1	14442046	14792885	14583402	-47433	64092	SAMSN1	-	CD4_Tcells	Intron	TCF7L2,IRF9,ETV2,MGA,TBX15,SNAI1,SNAI3,ELK1::HOXB13,ERF::HOXB13,FLI1::FOXI1	ZBTB18,ONECUT3,POU2F1,MGA,TBR1,TBX15,HOXA10,FOSL2::JUND,SNAI3,MYF5,CEBPD,FLI1::DRGX,FOXO1::ELK1,ZNF324	NFATC2,JUNB,TBX21,IRF4,BRD4,FOS,MED1
chr21-29295093-29295657	chr21	29295093	29295657	571	BACH1	29194110	29327202	29298871	-3495	571	BACH1	+	CD4_Tcells	Intron	IRF4,GFI1,ZIM3,ETV1,GABPA,ETV2::FOXI1,FLI1::FOXI1,FOXO1::ELF1,FOXO1::FLI1	REL,ZNF257,GABPA,FOXO1::ELK1,POU2F1::SOX2	NFKB1
chr21-31182044-31182820	chr21	31182044	31182820	7074	TIAM1	31084349	31609799	31130306	-52125	7074	TIAM1	-	CD4_Tcells	Exon	TCF7L2,FLI1,ERF,ETS1,ETV2,TCF7L1,SNAI1,SNAI3,ETV1,GABPA,MYOD1,SNAI2,TCF7,ETV2::FOXI1,FLI1::FOXI1,FOXO1::ELF1,FOXO1::FLI1	REL,HEY1,TCF7L1,FERD3L,SNAI3,ZNF257,GABPA,FOXO1::ELK1	IRF4,ETS1,JUNB,FOS,MYB,MAF,JUN,TBX21,BRD4,BCL6,MED1,AFF4
chr21-31184356-31184958	chr21	31184356	31184958	7074	TIAM1	31084349	31609799	31130306	-54350	7074	TIAM1	-	CD4_Tcells	Intron	MEIS3,MGA,TBX15,SNAI1,SNAI3,ETV1,GABPA,SNAI2,ETV2::FOXI1,FLI1::FOXI1,FOXO1::ELF1,FOXO1::FLI1	ESR2,POU3F1,MGA,TBX15,SNAI3,HAND2,GABPA,GRHL2,FOXO1::ELK1	IRF4,ETS1,RELA,NFKB1,MAF,JUNB,MYB,MED1,BRD4,TBX21,BCL6,GATA3,AFF4,FOS,JUN
chr21-31185554-31186093	chr21	31185554	31186093	7074	TIAM1	31084349	31609799	31130306	-55516	7074	TIAM1	-	CD4_Tcells	Intron	GFI1,ZIM3	NR2C2,POU3F1,TBR1,BARX2,CDX4,HLF,ZNF211,MNX1,NR1D2	GATA3,BCL6,MAF,TBX21
chr21-45592248-45592759	chr21	45592248	45592759	6573	SLC19A1	45510894	45594052	45544411	-48091	6573	SLC19A1	-	CD4_Tcells	Intron	MGA,TBX15,RUNX3	JUN,MGA,TBX15,ATF2,MAFK	BRD4,IRF4,MAF,BCL6,JUNB,JUN,MYB,TBX21,RELA,FOS,AFF4
chrX-96682463-96683012	chrX	96682463	96683012	1730	DIAPH2	95873945	96784462	96684663	-1925	1730	DIAPH2	+	CD4_Tcells	Distal Intergenic	TCF7L2,ETV1,ETV2::FOXI1,FLI1::FOXI1,FOXO1::ELF1	MAFK,FOXO1::ELK1,ZNF324
chrX-108018506-108019963	chrX	108018506	108019963	340547	VSIG1	108013671	108082158	108044970	-25735	340547	VSIG1	+	CD4_Tcells	Distal Intergenic	MEIS3,ZIM3,GABPA,RUNX3	NR2C2,ESR2,GABPA,GRHL2,MAFK
chrX-124086337-124086883	chrX	124086337	124086883	10735	STAG2	123910334	124160890	124093913	-7302	10735	STAG2	+	CD4_Tcells	3' UTR	IRF9,IRF4,IRF5,FOXK2,FOXO1::FLI1	JUN,ONECUT3
chrX-136646541-136647074	chrX	136646541	136647074	959	CD40LG	136643967	136707785	136648193	-1385	959	CD40LG	+	CD4_Tcells	Distal Intergenic	TCF7L2,SIX1,TCF7L1,SNAI1,SNAI3,SOHLH2,SNAI2,TCF7,FLI1::FOXI1,FOXO1::ELF1,FOXO1::FLI1	EWSR1-FLI1,TCF7L1,HES6,NR1I2,SNAI3,ZNF460,MYF5,HNF4G
chr1-70978636-70979200	chr1	70978636	70979200	5733	PTGER3	70877044	71048331	71047633	68714	5733	PTGER3	-	DCs	Intron	STAT1::STAT2	JUND,ZNF85,CREB1	STAG2,CTCF,CEBPA,CDK9,BRD4,RAD21,RUNX1,CEBPB,CDK8,TRIM24,JMJD1C,MLLT1
chr1-87231959-87232459	chr1	87231959	87232459	8543	LMO4	87230262	87351718	87328468	-96258	8543	LMO4	+	DCs	Intron	STAT1::STAT2,ETV7		VDR,RUNX1,BRD4,CDK9
chr1-98766213-98766713	chr1	98766213	98766713	51375	SNX7	98436225	98833353	98662223	104239	51375	SNX7	+	DCs	Distal Intergenic	STAT1::STAT2,ETV7,ZKSCAN5,EHF,ELF3,SPIB	OLIG3,CDX4,ELF1,ELF3,MEF2A,SPIB,FLI1::DRGX,NKX2-4	CDK8,CEBPA,BRD4,IRF8,TRIM24,JMJD1C,STAG2,RUNX1,RELA,LYL1,MYB,RAD21,CDK9,CEBPB,VDR,AR
chr1-100522900-100523437	chr1	100522900	100523437	54112	GPR88	100480935	100589375	100538137	-14968	54112	GPR88	+	DCs	Distal Intergenic	STAT1::STAT2,SPIC,ETV7,ZKSCAN5,EHF,ELF3,SPIB	ZNF257,ELF1,ELF3,RUNX3,SPIB,ELK1::HOXA1,FLI1::DRGX,FOXO1::ELK1	CDK8,MLLT1,LDB1,TRIM24,MYB,KDM1A,CTCF,RUNX1,IRF8,GFI1,JMJD1C,LMO2,TCF3,CEBPA,RAD21,BRD4,STAG2,CEBPB,CDK9,TFAP4,TCF12,KMT2A,STAT5A,AR,NR4A1,MED1,RELA,VDR,MLLT3,BRD2
chr1-176017701-176018201	chr1	176017701	176018201	64326	RFWD2	175912335	176335332	176081256	63304	64326	RFWD2	-	DCs	Intron	STAT1::STAT2,SPIC,ZKSCAN5,EHF,ELF3,SPIB	FOXH1,TBX15,TBX1,GSC2,ZNF135,ELF1,ELF3,RUNX3,SPIB,FOXO1::ELK1	IRF8,BRD4,JMJD1C,MYB,CEBPA,RAD21,CDK9
chr1-190759737-190760237	chr1	190759737	190760237	440704	LINC01720	190551949	191391673	190624890	135096	440704	LINC01720	+	DCs	Intron	STAT1::STAT2,ETV7,ZKSCAN5,SPIB	MEF2A,SPIB	KMT2A,CEBPA,CDK9,MLLT1,BRD4,CEBPB,IRF8,STAG2,TRIM24,CTCF,RELA,VDR,JMJD1C,STAT5A,RAD21,MYB,RUNX1,LYL1,MLLT3
chr1-192476899-192477428	chr1	192476899	192477428	5996	RGS1	192446360	192605956	192575727	-98563	5996	RGS1	+	DCs	Intron		JUND,JDP2,TBX15,FOSL1::JUN,NR2C1,CREB1,MEF2A,TBX21	CDK8,KMT2A,BRD4,CTCF,VDR,RAD21,CEBPA,CEBPB,RELA,TRIM24,RUNX1,FOS,AR,JMJD1C,NR4A1,MYB,MLLT3
chr1-217673335-217673835	chr1	217673335	217673835	128153	SPATA17	217631204	217877837	217631324	42260	128153	SPATA17	+	DCs	Intron	SPIC,EHF	REL,SREBF1,SREBF2,RAX,FIGLA,CDX4,MYF5,MEF2A,FOXO1::ELK1,POU2F1::SOX2	IRF8,JMJD1C,LYL1,RELA,BRD4,CEBPA,CEBPB,CTCF
chr1-244920887-244921420	chr1	244920887	244921420	84288	EFCAB2	244917124	245131082	244969705	-48551	84288	EFCAB2	+	DCs	Distal Intergenic	SPIB	TCF12,SPIB,TCF3,POU2F1::SOX2	CDK9,STAG2,BRD4,VDR,TRIM24,MED1,CEBPB,CTCF,CEBPA,KDM1A,BRD2,KMT2A,TCF3,CDK8,JMJD1C,IRF8,RAD21,TFAP4,LDB1,RUNX1,MYB,NR4A1,RELA,LYL1,AR,MAX,LMO2,MLLT3,JUND,TCF12,STAT5A,EP300
chr2-58449528-58450076	chr2	58449528	58450076	400955	LINC01122	58334586	59071155	58428385	21416	400955	LINC01122	+	DCs	Intron		JUND,DBP,JDP2,RAX,GBX2,FOSL1::JUN,ZNF257,OSR2,CREB1,EN2	RAD21,JMJD1C,IRF8,CEBPA,FOS,MYB,RUNX1,BRD4,TRIM24,CEBPB,AR,VDR,CDK8
chr2-75018068-75018622	chr2	75018068	75018622	56655	POLE4	74944961	75024961	74959111	59233	56655	POLE4	+	DCs	Distal Intergenic	STAT1::STAT2,SPIC	FOXD1,FOXO4,MEF2A,ONECUT1,FOXO1::ELK1	CDK9,CEBPA,IRF8,AR,JMJD1C,BRD4,RUNX1,TRIM24,CEBPB,RAD21,MYB,STAG2
chr2-78977553-78978097	chr2	78977553	78978097	130120	REG3G	78470811	79056465	79025686	-47860	130120	REG3G	+	DCs	Distal Intergenic	SPIC,ETV7,EHF,ELF3,SPIB	ELK4,MEIS3,TBX1,CDX4,ELF1,ELF3,SPIB,ELK1::HOXA1,FOXO1::ELK1,POU2F1::SOX2	STAG2,CDK9,MLLT1,IRF8,NR4A1,KMT2A,RUNX1,BRD4,RELA,CEBPB,CDK8,TRIM24,MYB,LDB1,RAD21,CTCF,JMJD1C,CEBPA,STAT5A,MED1,TCF12,KDM1A,JUND,TCF3,MLLT3,VDR
chr2-86783839-86784393	chr2	86783839	86784393	925	CD8A	86781064	86835155	86790825	6708	925	CD8A	-	DCs	Distal Intergenic	STAT1::STAT2,EHF	JUND,HOXD12,TCF12,CREB1,ELF1,TCF3,FOXO1::ELK1,TBX21	IRF8,STAT5A,BRD4,MYB,RAD21,CDK8,CEBPB,CEBPA
chr2-98549010-98549522	chr2	98549010	98549522	3631	INPP4A	98412378	98588343	98554425	-5158	3631	INPP4A	+	DCs	Intron	ZKSCAN5,ELF3	NHLH1,VSX2,POU3F1,ELF1,ELF3	EP300,TCF3,LDB1,TCF12,RUNX1
chr2-122323884-122324384	chr2	122323884	122324384	7247	TSN	121737014	122890729	121756171	567962	7247	TSN	+	DCs	Intron	SPIB	INSM1,NR2C1,SPIB	VDR,BRD4
chr2-129483290-129483797	chr2	129483290	129483797	151121	LINC01854	128796213	129598512	129273848	-209694	151121	LINC01854	-	DCs	Distal Intergenic	EHF,ELF3,SPIB	MEIS3,TBX15,TBX1,TCF12,ELF1,ELF3,SPIB,TCF3,FOXO1::ELK1	BRD4,STAG2,MYB,CEBPB,CDK8,RUNX1,IRF8,TRIM24,CEBPA,VDR,RAD21,CDK9,JMJD1C,NR4A1,CTCF,MLLT3
chr2-131146238-131146738	chr2	131146238	131146738	55041	PLEKHB2	131099154	131168479	131118891	27596	55041	PLEKHB2	+	DCs	Exon	EHF	ELF1	NR3C1,GFI1B,KDM1A,JMJD1C,LDB1,MLLT3,CDK8,RELA,RUNX1,BRD4,CEBPB,CEBPA,MLLT1,LMO2,STAT5A,TCF12,VDR,TFAP4,GABPA,TCF3,CTCF,CBFA2T3,CDK9,RAD21,LYL1,NR4A1,TRIM24
chr2-132384319-132384912	chr2	132384319	132384912	2863	GPR39	132337272	132637323	132416574	-31958	2863	GPR39	+	DCs	Distal Intergenic	STAT1::STAT2,SPIC,ETV7,ZKSCAN5,EHF,ELF3,SPIB	ELK4,ELF1,ELF3,SPIB,VAX2	CEBPA,LDB1,MYB,BRD2,KDM1A,BRD4,RUNX1,VDR,STAT5A,CEBPB,CDK9,RAD21,CDK8,IRF8,TCF12,CTCF,TRIM24
chr2-141557239-141557759	chr2	141557239	141557759	53353	LRP1B	139539159	142504599	141810401	252901	53353	LRP1B	-	DCs	Intron	SPIB	ZNF257,SPIB	CDK9,KMT2A,JMJD1C,STAT5A,TCF3,MYB,CEBPB,CDK8,RELA,RUNX1,BRD4,TFAP4,LDB1,CEBPA,RAD21,NR3C1,EP300,LYL1,LMO2,NR4A1,TRIM24,AR,TCF12,GABPA,JUND,MAX,FOS,KDM1A,CBFA2T3,STAG2,CTCF
chr2-152046933-152047435	chr2	152046933	152047435	785	CACNB4	151900241	152111882	152098461	51276	785	CACNB4	-	DCs	Intron	ETV7,ZKSCAN5,EHF,ELF3,SPIB	ELF3,MEF2A,RUNX3,SPIB,ELK1::HOXA1,FOXO1::ELK1,POU2F1::SOX2	FOS,BRD4,MLLT1,CDK8,CDK9,RAD21,LDB1,NR4A1,MYB,RUNX1,TCF3,KMT2A,STAT5A,JMJD1C,VDR,TFAP4,LYL1,LMO2,STAG2
chr2-164964645-164965145	chr2	164964645	164965145	151258	SLC38A11	164877810	165024676	164955525	-9369	151258	SLC38A11	-	DCs	Intron	SPIC,ETV7,ZKSCAN5,EHF,ELF3,SPIB	FOXD1,ELK4,FOXO4,ELF1,ELF3,RUNX3,SPIB,FOXO1::ELK1,NKX2-4	KMT2A,TCF3,KDM1A,TCF12,LDB1,BRD4,RUNX1,LMO2,CEBPA,NR4A1,CDK9,STAT5A,AR
chr2-166407662-166408162	chr2	166407662	166408162	6335	SCN9A	166216984	166420759	166375993	-31918	6335	SCN9A	-	DCs	Intron	STAT1::STAT2,SPIB	SPIB	VDR,CDK9
chr2-166413225-166413725	chr2	166413225	166413725	6335	SCN9A	166216984	166420759	166375993	-37481	6335	SCN9A	-	DCs	Intron		MEF2A,EN2	AR,CDK9,BRD4,FOS
chr2-181991433-181991988	chr2	181991433	181991988	151242	PPP1R1C	181937424	182172793	181986022	5687	151242	PPP1R1C	+	DCs	Intron	STAT1::STAT2,SPIC,SPIB	INSM1,NR2C1,SPIB	CTCF,CDK9,RUNX1,AR,RAD21,BRD4,IRF8,RELA,JMJD1C,MYB,NR4A1,VDR,TRIM24
chr2-187168995-187169786	chr2	187168995	187169786	10203	CALCRL	187148678	187472718	187448146	278755	10203	CALCRL	-	DCs	Intron	STAT1::STAT2,SPIC,ETV7,EHF,ELF3,SPIB	FOXD1,FOXH1,DBP,POU3F1,FOXO4,ELF1,ELF3,MEF2A,SPIB,FOXO1::ELK1,POU2F1::SOX2	CEBPA,BRD4,NR4A1,JMJD1C,RAD21,CEBPB,IRF8,FOS,CDK8,RUNX1,NR3C1,CDK9,LDB1,LYL1,MYB
chr2-187474943-187475958	chr2	187474943	187475958	7035	TFPI	187472719	187926697	187496976	21525	7035	TFPI	-	DCs	Intron	SPIC,EHF	JDP2,NKX2-8,CUX2,POU3F1,MEF2A,ONECUT1,RUNX3,NKX2-4	NR3C1,BRD4,AR,CEBPA,RUNX1,LDB1,CDK9,NR4A1,JUND,RAD21,JMJD1C,KMT2A
chr2-187510011-187510511	chr2	187510011	187510511	7035	TFPI	187472719	187926697	187513641	3379	7035	TFPI	-	DCs	Intron	SPIC,EHF	POU3F1,TBX15,ELF1,MEF2A,FOXO1::ELK1	KMT2A,MYB,LYL1,LDB1,BRD4,CEBPA,STAT5A,NR3C1,CDK9
chr2-189514032-189514540	chr2	189514032	189514540	84128	WDR75	189310657	189521612	189462484	51801	84128	WDR75	+	DCs	Distal Intergenic	STAT1::STAT2,SPIB	SREBF1,ZNF257,MEF2A,ONECUT1,SPIB	IRF8,MYB,CEBPA,MLLT1,CDK9,RELA,BRD4,CEBPB,RUNX1,STAT5A,JMJD1C,LYL1,VDR,RAD21
chr2-194104150-194105127	chr2	194104150	194105127	101927406	LINC01821	193547119	194537438	194344269	-239630	101927406	LINC01821	+	DCs	Distal Intergenic	SPIC,ETV7,EHF,SPIB	JUND,MEIS3,TBX1,FIGLA,MSANTD3,ZNF85,MEF2A,ONECUT1,RUNX3,SPIB	CEBPB,CEBPA,BRD4,CDK9,MYB,LDB1,STAG2,AR,KDM1A,RAD21,CTCF,TRIM24,RUNX1,STAT5A,JMJD1C,NR4A1,RELA,CDK8,MLLT1
chr2-200198960-200200002	chr2	200198960	200200002	26010	SPATS2L	200132574	200489961	200305881	-106399	26010	SPATS2L	+	DCs	Distal Intergenic	STAT1::STAT2,SPIC,EHF,ELF3,SPIB	INSM1,FOXH1,JDP2,NHLH1,OLIG3,FOSL1::JUN,ZNF85,ELF1,ELF3,RUNX3,SPIB	AR,CDK9,RUNX1,MLLT1,BRD4,STAT5A,LDB1,RELA,MYB,RAD21,NR3C1,JMJD1C,CEBPB,VDR,CEBPA,CTCF
chr2-209121650-209122182	chr2	209121650	209122182	4133	MAP2	208956573	209740973	209424058	-302141	4133	MAP2	+	DCs	Distal Intergenic	STAT1::STAT2,ZKSCAN5,SPIB	ZNF85,SPIB	IRF8,CDK9,RUNX1,STAT5A,BRD4
chr2-209619671-209620218	chr2	209619671	209620218	4133	MAP2	208956573	209740973	209653171	-33226	4133	MAP2	+	DCs	Intron	SPIC,ETV7,ZKSCAN5,EHF,ELF3,SPIB	FOXO4,ZNF85,ELF1,ELF3,MEF2A,ONECUT1,SPIB,POU2F1::SOX2	CTCF,CEBPA,BRD4,CDK9,CEBPB,MYB,RUNX1,IRF8,TCF3,CDK8,RELA,LYL1,LDB1,JMJD1C,TRIM24,NR4A1,TCF12,KDM1A,STAT5A,RAD21,MLLT1,NR3C1,STAG2,KMT2A
chr2-213315387-213315887	chr2	213315387	213315887	79582	SPAG16	213218404	213624015	213296064	19572	79582	SPAG16	+	DCs	Intron	SPIC,ETV7,ZKSCAN5,EHF,ELF3,SPIB	FOSL1::JUN,ELF1,ELF3,SPIB,FOXO1::ELK1
chr2-215846060-215846576	chr2	215846060	215846576	646324	LINC00607	215772724	215928667	215843722	-2595	646324	LINC00607	-	DCs	Intron	STAT1::STAT2,ZKSCAN5	REL,CDX4,MSANTD3,HOXB2::ELK1	STAG2,MYB,CDK9,JMJD1C,RELA,BRD4,TRIM24,AR,IRF8,CEBPA,STAT5A,CEBPB,RAD21,CDK8,KMT2A,VDR,NR4A1
chr2-225112630-225113131	chr2	225112630	225113131	55619	DOCK10	225026463	225221546	225042445	-70434	55619	DOCK10	-	DCs	Distal Intergenic	SPIC,ZKSCAN5,SPIB	MNT,MSANTD3,ZNF257,SPIB	CTCF,MLLT3,MLLT1,MYB,BRD4,IRF8,RUNX1,STAG2,CEBPA,CDK8,KMT2A,JMJD1C,BRD2,RAD21,TRIM24,CDK9,RELA,VDR
chr2-225270725-225271265	chr2	225270725	225271265	57624	NYAP2	225221547	226029720	225400648	-129652	57624	NYAP2	+	DCs	Distal Intergenic	SPIC,ZKSCAN5,SPIB	REL,JDP2,FOSL1::JUN,ZNF85,SPIB,POU2F1::SOX2	CEBPB,FOS,IRF8,JUND,VDR,CEBPA,BRD4,MYB,RUNX1,CDK9,JMJD1C,TCF12,RAD21,CTCF,AR,RELA,STAG2,KMT2A
chr3-5974516-5975107	chr3	5974516	5975107	100616334	MIR4790	5222681	6010128	5250255	-724555	100616334	MIR4790	-	DCs	Intron	ETV7,ZKSCAN5,EHF,ELF3,SPIB	NHLH1,NKX2-8,TBX1,ELF1,ELF3,RUNX3,SPIB,NKX2-4,TBX21	CDK9,BRD4,STAT5A,RUNX1
chr3-16504081-16504787	chr3	16504081	16504787	23180	RFTN1	16296167	16525173	16512904	8469	23180	RFTN1	-	DCs	Intron	SPIB	JUND,CREB1,RUNX3,SPIB,NKX2-4	BRD4,STAT5A,CDK8,RUNX1,AR,JMJD1C,TRIM24,KMT2A,RELA,TCF3,RAD21,CDK9,MYB,CEBPA,LDB1,CEBPB,LMO2,STAG2
chr3-28989688-28990188	chr3	28989688	28990188	27303	RBMS3	28928706	29286171	29280982	-291043	27303	RBMS3	+	DCs	Intron	SPIC,EHF,ELF3,SPIB	FOSL1::JUN,ELF1,ELF3,MEF2A,SPIB	CDK8,JMJD1C,STAG2,RAD21,BRD4,FOS,VDR,KMT2A
chr3-30221545-30222067	chr3	30221545	30222067	27303	RBMS3	29362792	30297287	29988073	233732	27303	RBMS3	+	DCs	Distal Intergenic	STAT1::STAT2	RUNX3,POU2F1::SOX2	LDB1,STAG2,BRD4,TCF3,NR3C1,CDK8,AR,RUNX1,CEBPA,NR4A1,JMJD1C,RAD21,MYB,CDK9,CEBPB,MLLT3,STAT5A,TRIM24,KDM1A
chr3-34361809-34362461	chr3	34361809	34362461	10015	PDCD6IP	33758355	34751420	33863896	498238	10015	PDCD6IP	+	DCs	Intron	STAT1::STAT2,SPIC,ZKSCAN5,SPIB	JUND,SREBF1,SREBF2,CUX2,MSANTD3,NR2C1,ZNF257,CREB1,ELF1,SPIB,FOXO1::ELK1	VDR,JMJD1C,CTCF,KDM1A,MYB,BRD4,BRD2,AR,NR3C1,NCOA2,TRIM24,RAD21,MLLT3,LDB1,RUNX1,NR4A1,STAG2,STAT5A
chr3-66644537-66645037	chr3	66644537	66645037	26018	LRIG1	66333003	66749785	66501263	-143523	26018	LRIG1	-	DCs	Distal Intergenic	SPIC,ELF3	FOXH1,OSR2,ELF3,MEF2A	CDK9,CTCF,BRD4,STAG2,CEBPA,MYB,CEBPB,VDR,KMT2A,RAD21,RUNX1,JMJD1C,TRIM24,GFI1,CDK8,IRF8,RELA,LYL1,MLLT1,STAT5A
chr3-66856409-66856918	chr3	66856409	66856918	84541	KBTBD8	66749786	67263573	66998307	-141643	84541	KBTBD8	+	DCs	Distal Intergenic	ZKSCAN5,EHF,SPIB	MSANTD3,SCRT1,SCRT2,SPIB	JMJD1C,CEBPA,MYB,BRD4,TCF3,LDB1,STAT5A,RUNX1,LMO2
chr3-67290338-67290851	chr3	67290338	67290851	8801	SUCLG2	67263574	67829415	67528222	237627	8801	SUCLG2	-	DCs	Distal Intergenic	STAT1::STAT2	ZNF257,TCF12,TCF3,ELK1::HOXA1,FLI1::DRGX	MYB,CDK9,RUNX1,IRF8,AR,BRD4,JMJD1C,STAT5A,CEBPB,TRIM24,CEBPA,RAD21,MLLT1,NR4A1,GFI1
chr3-70006050-70006582	chr3	70006050	70006582	101927152	SAMMSON	69968204	70483048	69999744	6571	101927152	SAMMSON	+	DCs	Intron	SPIC,ETV7,EHF,SPIB	FOXH1,NHLH1,CUX2,CDX4,MYF5,RUNX3,SPIB,FOXO1::ELK1,POU2F1::SOX2,EN2	KMT2A,MLLT1,CEBPA,CEBPB,STAT5A,AR,NR4A1,CDK8,BRD4,JMJD1C,TRIM24,RUNX1,MYB,VDR,LDB1
chr3-81485308-81486038	chr3	81485308	81486038	2632	GBE1	81285906	83315868	81577943	92269	2632	GBE1	-	DCs	Distal Intergenic	STAT1::STAT2,SPIB	FIGLA,FOSL1::JUN,MYF5,MEF2A,SPIB,FLI1::DRGX,POU2F1::SOX2	IRF8,VDR,CDK9,STAT5A,RAD21,JMJD1C,TRIM24,RELA,MLLT1,BRD4,FOS,RUNX1,CEBPB,CDK8,MYB,BRD2,CEBPA,KMT2A
chr3-97954080-97954873	chr3	97954080	97954873	84864	RIOX2	97935807	98003723	97951183	-3292	84864	RIOX2	-	DCs	3' UTR	SPIB	FOXO4,OSR2,RUNX3,SPIB,HOXB2::ELK1	CTCF,BRD2,LDB1,RAD21,STAG2,BRD4,MYB,IRF8,RUNX1,JMJD1C,VDR,KMT2A
chr3-105351679-105352323	chr3	105351679	105352323	214	ALCAM	104445513	105709631	105366909	-14907	214	ALCAM	+	DCs	Distal Intergenic	ETV7,ZKSCAN5,EHF,ELF3,SPIB	FOXH1,JDP2,POU3F1,FOSL1::JUN,ELF3,MEF2A,SCRT2,SPIB	BRD4,CDK8,CEBPB,CEBPA,RAD21,FOS,NR3C1,RELA,JMJD1C,NR4A1,AR,IRF8,TRIM24
chr3-107633512-107634294	chr3	107633512	107634294	56987	BBX	107476934	107823794	107645836	-11932	56987	BBX	+	DCs	Intron	ZKSCAN5,EHF,SPIB	CUX2,ONECUT1,SPIB	VDR,TCF3,CDK8,BRD4,MLLT1,LDB1,MYB,LMO2,KMT2A,MED1,RUNX1,STAG2,JMJD1C,LYL1,CEBPA,CBFA2T3,STAT5A,TRIM24,CTCF
chr3-117553397-117553962	chr3	117553397	117553962	4045	LSAMP	117030411	118034821	117139389	-414289	4045	LSAMP	-	DCs	Distal Intergenic	STAT1::STAT2,SPIB	SREBF1,SREBF2,TBX15,TBX1,FOSL1::JUN,ZNF784,SPIB	AR,FOS,CDK9,IRF8,BRD4,TRIM24,RAD21,NR4A1,VDR,CDK8,RUNX1,JMJD1C,MYB
chr3-117603108-117603614	chr3	117603108	117603614	4045	LSAMP	117030411	118034821	117139389	-463971	4045	LSAMP	-	DCs	Distal Intergenic	ZKSCAN5,SPIB	NKX2-8,VSX2,OSR2,RUNX3,SPIB	KDM1A,BRD4,LDB1,TCF3,BRD2,TRIM24,LMO2,MYB,RUNX1,RELA,JMJD1C,TCF12,LYL1,STAT5A,RAD21
chr3-117722810-117723601	chr3	117722810	117723601	4045	LSAMP	117030411	118034821	117139389	-583815	4045	LSAMP	-	DCs	Intron	STAT1::STAT2,ZKSCAN5,SPIB	REL,ZNF135,ZNF257,MEF2A,ONECUT1,SCRT1,SCRT2,SPIB	GFI1,IRF8,BRD4,STAT5A,RELA,RAD21,LDB1,CEBPB,VDR,TRIM24,JMJD1C,CDK9,KDM1A,CEBPA,MYB
chr3-131020030-131020598	chr3	131020030	131020598	28990	ASTE1	131009261	131026866	131024450	4135	28990	ASTE1	-	DCs	Intron	SPIC,SPIB	NHLH1,POU3F1,OSR2,SPIB,POU2F1::SOX2	TCF3,JMJD1C,LDB1,CEBPA,RUNX1,STAG2,KMT2A,MYB,BRD4,MAX,RAD21,CDK8,CTCF,TFAP4,KDM1A
chr3-144028616-144029210	chr3	144028616	144029210	205428	C3orf58	143910165	145022389	143973608	55304	205428	C3orf58	+	DCs	Intron	STAT1::STAT2,SPIC,ETV7,ZKSCAN5,SPIB	NHLH1,FOXO4,OSR2,SPIB	MLLT1,BRD4,STAG2,IRF8,TFAP4,RUNX1,MYB,LYL1,TCF3,LDB1,AR,CDK9,TRIM24,CEBPB,CDK8,KDM1A,JUND,RAD21,JMJD1C,NR4A1,CTCF,CEBPA,MLLT3
chr3-152870050-152870559	chr3	152870050	152870559	5028	P2RY1	152646193	152998481	152834693	35610	5028	P2RY1	+	DCs	Distal Intergenic	SPIC,EHF,ELF3,SPIB	OSR2,ELF1,ELF3,SPIB	RUNX1,BRD4,MYB,AR,NR3C1,CEBPB,NCOA2,CEBPA,CDK9
chr4-14008445-14008974	chr4	14008445	14008974	152742	LINC01085	13966040	14414307	14111968	-103258	152742	LINC01085	+	DCs	Distal Intergenic	EHF,ELF3,SPIB	ELF1,ELF3,MEF2A,RUNX3,SPIB,FOXO1::ELK1	TCF3,CEBPA,CEBPB,CDK9,LDB1,MLLT3,MYB,EP300,RUNX1,STAT5A,TCF12,KDM1A,BRD4,TRIM24,VDR,JMJD1C,AR,LYL1,LMO2,RAD21
chr4-17476750-17477378	chr4	17476750	17477378	5860	QDPR	17339284	17513699	17492508	15443	5860	QDPR	-	DCs	Intron	STAT1::STAT2,SPIC	NHLH1,MYF5,SCRT1,SCRT2,NKX2-4	TCF3,LDB1,TFAP4,CDK8,RUNX1,LMO2,CEBPA,CEBPB,AR,TRIM24,JMJD1C,MYB,BRD4,STAT5A
chr4-20629402-20629923	chr4	20629402	20629923	9353	SLIT2	20530838	20655572	20614863	14798	9353	SLIT2	+	DCs	Distal Intergenic	STAT1::STAT2,EHF,ELF3,SPIB	POU3F1,CDX4,ELF1,ELF3,SPIB	TFAP4,RUNX1,BRD4,STAT5A,CDK9,LDB1
chr4-22483342-22484191	chr4	22483342	22484191	166647	ADGRA3	22171834	22604484	22478236	-5529	166647	ADGRA3	-	DCs	Intron	EHF,ELF3,SPIB	CDX4,ELF1,ELF3,SPIB	TCF3,KDM1A,GFI1B,TFAP4,MLLT1,LDB1,MYB,NR4A1,LYL1,JMJD1C,CDK8,RUNX1,BRD4,AR,STAT5A,VDR,CEBPA,KMT2A,MED1,CEBPB,TRIM24,CDK9,STAG2
chr4-25880120-25880632	chr4	25880120	25880632	23231	SEL1L3	25862395	25888833	25863760	-16615	23231	SEL1L3	-	DCs	Intron	STAT1::STAT2	NHLH1	BRD4,CDK8,CDK9,TRIM24,MED1,NR4A1,VDR,MYB,RUNX1,RAD21,CEBPA,STAG2,JMJD1C,CEBPB,EP300
chr4-56803366-56803877	chr4	56803366	56803877	6691	SPINK2	56746848	56864809	56811796	8174	6691	SPINK2	-	DCs	Distal Intergenic	ETV7,ZKSCAN5,EHF,ELF3,SPIB	CDX4,ZNF85,OSR2,TCF12,ELF1,ELF3,RUNX3,SPIB,TCF3	KDM1A,TCF3,MYB,LDB1,LMO2,JMJD1C,JUND,CDK8,EP300,LYL1,STAT5A,RUNX1,TCF12,BRD4,CEBPA,MED1,IRF8,RAD21,NR3C1
chr4-66943037-66943566	chr4	66943037	66943566	1060	CENPC	66886013	67552167	67495201	551899	1060	CENPC	-	DCs	Distal Intergenic	STAT1::STAT2,EHF,ELF3,SPIB	FIGLA,ELF1,ELF3,SPIB	BRD4,IRF8,CDK9,MYB,RUNX1,VDR,NR3C1,JMJD1C
chr4-70691644-70692144	chr4	70691644	70692144	57050	UTP3	70685149	70696451	70688479	3414	57050	UTP3	+	DCs	Distal Intergenic	STAT1::STAT2,SPIC,EHF,ELF3,SPIB	ZNF784,MYF5,ELF1,ELF3,SPIB,FOXO1::ELK1	KMT2A,KDM1A
chr4-81393302-81393842	chr4	81393302	81393842	153020	RASGEF1B	81336360	82200818	81457602	64029	153020	RASGEF1B	-	DCs	Distal Intergenic		JUND,NHLH1,ZNF135,MEF2A	BRD4,CDK9
chr4-83240308-83241075	chr4	83240308	83241075	27235	COQ2	83208067	83309848	83279058	38366	27235	COQ2	-	DCs	Intron	STAT1::STAT2,EHF,ELF3	ELK4,SREBF1,RAX,CREB1,ELF1,ELF3,ONECUT1,RUNX3	BRD2,MLLT1,AR,BRD4,KMT2A,MED1,TRIM24,STAT5A,STAG2,JMJD1C,VDR,MLLT3,LMO2,LDB1,CDK9,RAD21,RUNX1,NR4A1,KDM1A,CEBPA,TCF3,LYL1,IRF8,MYB,RELA,CDK8,CEBPB,EP300,GFI1,JUND
chr4-88101086-88101588	chr4	88101086	88101588	5311	PKD2	87992275	88107368	88056066	45270	5311	PKD2	+	DCs	Exon	STAT1::STAT2	ZNF85,MEF2A	BRD4,TCF3,CTCF,LDB1,GFI1,RUNX1,RAD21,KDM1A,LMO2,NR3C1,GFI1B,JMJD1C
chr4-102593022-102593522	chr4	102593022	102593522	4790	NFKB1	102466294	102622043	102593249	22	4790	NFKB1	+	DCs	Promoter	STAT1::STAT2,EHF,SPIB	ELF1,MEF2A,ONECUT1,SPIB	KMT2A,CDK9,JMJD1C,BRD4,STAT5A,MYB,RUNX1,CEBPA
chr4-110310725-110311253	chr4	110310725	110311253	2028	ENPEP	110282467	110589912	110365733	-54743	2028	ENPEP	+	DCs	Distal Intergenic	SPIC,ZKSCAN5,EHF,SPIB	SPIB,EN2	KDM1A,GFI1,GFI1B,CDK9,BRD4
chr4-111930577-111931082	chr4	111930577	111931082	132720	FAM241A	111503023	112188567	112145397	-214567	132720	FAM241A	+	DCs	Exon	STAT1::STAT2,EHF,ELF3,SPIB	NKX2-8,POU3F1,HOXB5,ELF1,ELF3,ONECUT1,RUNX3,SPIB,VAX2	CEBPA,CEBPB,MYB,CDK9,JMJD1C,BRD4,RUNX1,CDK8,IRF8,RAD21,NR4A1,TRIM24
chr4-111991203-111992206	chr4	111991203	111992206	132720	FAM241A	111503023	112188567	112145397	-153692	132720	FAM241A	+	DCs	Intron	STAT1::STAT2,SPIC,ZKSCAN5,EHF,ELF3,SPIB	FOXH1,MNT,GSC2,ZNF257,ELF1,ELF3,ONECUT1,SPIB	IRF8,CDK9,BRD4,JMJD1C,STAT5A,AR,CEBPB,FOS,CDK8
chr4-141173912-141174909	chr4	141173912	141174909	57484	RNF150	140861996	141216882	141212877	38466	57484	RNF150	-	DCs	Intron	STAT1::STAT2,ETV7,EHF,ELF3,SPIB	NKX2-8,POU3F1,ELF1,ELF3,SPIB,FOXO1::ELK1,HOXB2::ELK1,NKX2-4	JMJD1C,BRD4,CDK9,IRF8,RUNX1,KMT2A,STAG2,MYB,VDR
chr4-142961710-142962228	chr4	142961710	142962228	8821	INPP4B	142013808	143016174	142847432	-114536	8821	INPP4B	-	DCs	Intron	STAT1::STAT2,SPIC,ETV7,EHF,ELF3,SPIB	FOXH1,NKX2-8,ELF1,ELF3,MEF2A,SPIB,FOXO1::ELK1	CDK9,BRD4,MYB,TCF3,MAX,STAG2,KDM1A,VDR,STAT5A,RUNX1,JUND,LDB1,CEBPA,IRF8,LMO2,CTCF,JMJD1C,LYL1,CEBPB,TCF12,RAD21,RELA,NCOA2,NR3C1,AR
chr4-144338157-144338657	chr4	144338157	144338657	2993	GYPA	144067126	144393386	144140751	-197655	2993	GYPA	-	DCs	Intron	ETV7,EHF,ELF3,SPIB	ELF1,ELF3,SPIB	VDR,CDK9,CEBPA,BRD4,LDB1,MYB,TCF3,MLLT1,CEBPB,LYL1,RUNX1,TRIM24,CDK8,NR4A1,LMO2,RELA,STAG2,STAT5A,RAD21,JMJD1C,NR3C1,TCF12,GABPA,EP300
chr4-151887442-151887949	chr4	151887442	151887949	5188	GATB	151604451	151930888	151761023	-126671	5188	GATB	-	DCs	Exon	SPIC,ZKSCAN5,EHF,ELF3	ELK4,SHOX,RAX,ETS1,GBX2,OSR2,ELF1,ELF3,RUNX3	STAG2,TCF3,FOS,NR4A1,MYB,BRD4,LDB1,RUNX1,JMJD1C,TRIM24,IRF8,RAD21,STAT5A,VDR,LMO2,AR,NCOA2,NR3C1,CDK9,JUND,KMT2A
chr4-163482157-163482681	chr4	163482157	163482681	84076	TKTL2	163409290	163484094	163473746	-8672	84076	TKTL2	-	DCs	Distal Intergenic	SPIC,SPIB	NKX2-8,SPIB,FOXO1::ELK1,NKX2-4	CDK9,MLLT1,BRD4,IRF8,JMJD1C,MYB,CEBPA,RUNX1,TRIM24,CTCF,RAD21,CEBPB,RELA
chr4-163600668-163601205	chr4	163600668	163601205	55016	MARCH1	163564989	164569057	163612905	11968	55016	MARCH1	-	DCs	Intron	EHF,ELF3	HOXB5,ELF3,RUNX3,SCRT1,VAX2	BRD4,CEBPB,MYB,JMJD1C,CEBPA,CDK9,CDK8,MLLT3,RAD21,STAG2
chr4-167222003-167222527	chr4	167222003	167222527	50859	SPOCK3	166488758	167663655	167234065	11799	50859	SPOCK3	-	DCs	Intron	STAT1::STAT2	ONECUT1	CDK9,MLLT1,LDB1,BRD4,TRIM24,CDK8,IRF8,RELA,AR,CEBPA,NR4A1,CEBPB,RUNX1,RAD21,MYB,STAT5A,LYL1,STAG2,JMJD1C
chr4-169952457-169952957	chr4	169952457	169952957	100506085	LINC02275	169866928	169989829	169975902	23194	100506085	LINC02275	-	DCs	Intron	SPIC,ETV7,ZKSCAN5,EHF,ELF3,SPIB	ZNF257,ELF1,ELF3,MEF2A,SPIB,FOXO1::ELK1	STAG2,LDB1,RAD21,CDK8,KDM1A,MLLT1,TCF3,RUNX1,CTCF,KMT2A,JMJD1C,TRIM24,MYB,TCF12,NR4A1,RELA,LYL1,CDK9,BRD4,JUND,LMO2,STAT5A,VDR,CBFA2T3,CEBPB,CEBPA,AR
chr4-171629088-171629588	chr4	171629088	171629588	442117	GALNTL6	171499220	172989056	171812254	-182915	442117	GALNTL6	+	DCs	Intron	ETV7,ZKSCAN5,EHF,ELF3,SPIB	HOXD12,ZNF135,ELF1,ELF3,ONECUT1,RUNX3,SPIB,VAX2	JMJD1C,CEBPA,RAD21,STAG2
chr4-172758860-172759365	chr4	172758860	172759365	442117	GALNTL6	171499220	172989056	172809360	-50247	442117	GALNTL6	+	DCs	Intron	SPIC,EHF,ELF3,SPIB	TBX15,TBX1,CDX4,ZNF784,ELF3,SPIB,TBX21	LDB1,RUNX1,LMO2,RAD21,TCF3,VDR,CEBPA,NR3C1
chr4-176013392-176013912	chr4	176013392	176013912	2823	GPM6A	175280079	176034249	176002664	-10987	2823	GPM6A	-	DCs	Exon	ETV7,EHF,ELF3,SPIB	ELK4,FIGLA,ZNF257,MYF5,ELF1,ELF3,SPIB,FOXO1::ELK1,HOXB2::ELK1	LDB1,BRD4,LMO2,RUNX1,CDK9,KDM1A,MYB,LYL1,JMJD1C,IRF8,TRIM24,STAG2,KMT2A
chr4-176052584-176053110	chr4	176052584	176053110	116966	WDR17	176034250	176183604	176065834	-12986	116966	WDR17	+	DCs	Distal Intergenic	STAT1::STAT2,SPIC,SPIB	CDX4,CREB1,SPIB	CDK9
chr5-14351161-14351701	chr5	14351161	14351701	7204	TRIO	14044123	14540145	14387343	-35911	7204	TRIO	+	DCs	Intron	STAT1::STAT2	MNT,SNAI3,SOHLH2,ZNF85,OSR2,TCF12,TCF3	TCF3,RUNX1,VDR,MLLT3,LDB1,JMJD1C,TFAP4,CTCF,RAD21,STAG2,BRD4,LMO2,TCF12,MYB
chr5-66351691-66352201	chr5	66351691	66352201	101928769	LINC02229	66344466	66553982	66511604	159657	101928769	LINC02229	-	DCs	Intron	STAT1::STAT2,SPIB	SREBF1,SHOX,FIGLA,OSR2,SPIB	AR,BRD4,RAD21,TCF3,CEBPA,CDK9,RUNX1,CEBPB,JMJD1C,LDB1,STAT5A,MYB,LMO2,TCF12,MLLT3
chr5-109506456-109506969	chr5	109506456	109506969	9867	PJA2	109280476	109549680	109409994	-96717	9867	PJA2	-	DCs	Distal Intergenic	STAT1::STAT2,ETV7,ZKSCAN5,EHF,ELF3,SPIB	ELF1,ELF3,SPIB,FOXO1::ELK1	CEBPA,CDK9,RELA,STAG2,STAT5A,BRD4,RAD21,LYL1,JMJD1C,VDR,TRIM24,RUNX1,NR4A1
chr5-122220415-122220915	chr5	122220415	122220915	9627	SNCAIP	122220489	122456607	122311354	-90688	9627	SNCAIP	+	DCs	Distal Intergenic	STAT1::STAT2,ZKSCAN5,SPIB	TBX1,SPIB,TBX21	IRF8,BRD4,RAD21,MYB,RUNX1,JMJD1C,MLLT3,AR,CTCF
chr5-126358409-126358949	chr5	126358409	126358949	65983	GRAMD2B	126269855	126515129	126360132	-1452	65983	GRAMD2B	+	DCs	Intron		FIGLA,HOXD12,FOSL1::JUN,ONECUT1,RUNX3,SCRT1,SCRT2	CDK9,KMT2A,FOS,BRD4,MLLT3,TCF3,CEBPA,VDR,MLLT1,RUNX1,STAT5A,MYB,JMJD1C,STAG2,NR4A1,RAD21
chr5-134813266-134814198	chr5	134813266	134814198	9879	DDX46	134748678	134835746	134818916	-5183	9879	DDX46	+	DCs	Intron	ETV7,ZKSCAN5,EHF,ELF3,SPIB	HOXD12,CDX4,ZBTB32,ZNF135,ZNF257,ELF3,SPIB,FLI1::DRGX,HOXB2::ELK1	TCF3,MYB,CDK8,RUNX1,JMJD1C,LDB1,CDK9,NR4A1,BRD4,CEBPA
chr5-144237772-144238272	chr5	144237772	144238272	57528	KCTD16	144170774	144985138	144205277	32744	57528	KCTD16	+	DCs	Intron	STAT1::STAT2,ZKSCAN5	NR2C1,ZNF135,ZNF257,CREB1,RUNX3,SCRT1	RAD21,RUNX1,BRD4
chr5-145689171-145689727	chr5	145689171	145689727	153768	PRELID2	144985139	145854168	145765000	75550	153768	PRELID2	-	DCs	Intron	STAT1::STAT2,SPIB	OSR2,SPIB	BRD2,VDR,RUNX1,MLLT3,IRF8,RELA,TRIM24,CTCF,MYB,BRD4,RAD21,JMJD1C,KMT2A,CDK9,CEBPB,LMO2
chr5-159805039-159805549	chr5	159805039	159805549	101927766	LINC01847	159668831	159894083	159871384	66089	101927766	LINC01847	-	DCs	Exon	SPIC,ZKSCAN5,EHF,ELF3,SPIB	MSANTD3,ZNF257,ELF1,ELF3,SPIB,FOXO1::ELK1	CDK8,CDK9,KDM1A,CTCF,NR3C1,BRD4,KMT2A,JMJD1C,TRIM24,LDB1,MYB,STAG2,RAD21,NR4A1,RUNX1,AR,VDR,TCF12,CEBPA,TCF3,STAT5A,CBFA2T3
chr5-171968347-171968847	chr5	171968347	171968847	23291	FBXW11	171827275	172030036	171977756	9158	23291	FBXW11	-	DCs	Intron	EHF,ELF3,SPIB	ELK4,ZNF135,ZNF257,OSR2,ELF1,ELF3,SPIB	TCF3,MLLT1,CDK9,KMT2A,STAT5A,BRD4,RELA,MYB,RUNX1
chr6-56932824-56933324	chr6	56932824	56933324	667	DST	56428082	56954877	56954628	21553	667	DST	-	DCs	Intron	ZKSCAN5,ELF3,SPIB	REL,SREBF2,NKX2-8,OLIG3,ELF1,ELF3,ONECUT1,SPIB,ELK1::HOXA1,NKX2-4	MYB,JMJD1C,CDK9,RUNX1,KDM1A,LDB1,RAD21,TRIM24,GFI1,CDK8,KMT2A
chr6-57108597-57109098	chr6	57108597	57109098	26036	ZNF451	57066796	57166567	57102561	6285	26036	ZNF451	+	DCs	3' UTR	STAT1::STAT2,EHF,SPIB	FOXH1,SREBF1,SREBF2,ONECUT1,SPIB	CDK9,CEBPA,IRF8,BRD4,CEBPB,MYB,RAD21,CTCF,STAT5A,KMT2A
chr6-68756396-68757649	chr6	68756396	68757649	577	ADGRB3	68482634	69511849	68638676	118345	577	ADGRB3	+	DCs	Intron	STAT1::STAT2,ETV7,ZKSCAN5,EHF,ELF3,SPIB	FOXD1,SREBF2,FIGLA,FOXO4,CDX4,SNAI3,OSR2,TCF12,ELF1,ELF3,ONECUT1,SCRT1,SPIB,TCF3	MYB,KMT2A,BRD4,CDK9,CEBPA,STAT5A,KDM1A,JMJD1C,RAD21,RUNX1,MLLT1,LDB1
chr6-104639579-104640601	chr6	104639579	104640601	57531	HACE1	103394011	104908483	104859877	219786	57531	HACE1	-	DCs	Distal Intergenic	STAT1::STAT2,ETV7,ZKSCAN5,EHF,ELF3,SPIB	ELK4,DBP,SNAI3,ELF1,ELF3,SPIB,FOXO1::ELK1,POU2F1::SOX2	CDK8,BRD4,CEBPB,CDK9,IRF8,CEBPA,RAD21,RELA,TRIM24,NR3C1,AR,JMJD1C,MYB,STAT5A,FOS,RUNX1,KMT2A,KDM1A,GFI1B
chr6-117771416-117771916	chr6	117771416	117771916	116150	NUS1	117639023	117791514	117675502	96163	116150	NUS1	+	DCs	Distal Intergenic	ZKSCAN5,SPIB	INSM1,SREBF1,SPIB	TRIM24,VDR,MLLT1,MYB,BRD4,IRF8,RUNX1,CDK9,CEBPA,STAT5A,RAD21,JMJD1C
chr6-119444469-119444969	chr6	119444469	119444969	4121	MAN1A1	119249575	119682470	119349761	-94957	4121	MAN1A1	-	DCs	Intron	STAT1::STAT2,SPIC,ZKSCAN5,EHF,SPIB	ZNF257,OSR2,SPIB,VAX2	TRIM24,RUNX1,BRD4,IRF8,AR,RAD21
chr6-122709990-122710530	chr6	122709990	122710530	5570	PKIB	122471870	122748518	122717561	-7300	5570	PKIB	+	DCs	Intron	STAT1::STAT2,SPIC,SPIB	CUX2,CDX4,CREB1,ONECUT1,SPIB	RELA,CDK9,MLLT1,RUNX1,TCF3,NR4A1,LDB1,CEBPA,MYB,NR3C1,CDK8,JMJD1C,MED1,JUND,LMO2,AR,BRD4,CEBPB,RAD21,STAT5A,VDR,NCOA2,TRIM24,KDM1A,STAG2
chr6-131917154-131917871	chr6	131917154	131917871	1490	CTGF	131906492	132033318	131951373	33860	1490	CTGF	-	DCs	Intron	SPIC	NKX2-8,MEF2A,NKX2-4,EN2	TCF3,KDM1A,MYB,RUNX1,LDB1,BRD4,TCF12,TRIM24,CEBPA,LMO2,NR4A1,LYL1,CDK8,JMJD1C,STAT5A,CDK9,GFI1B
chr6-132650869-132651459	chr6	132650869	132651459	134864	TAAR1	132635140	132680026	132646003	-5160	134864	TAAR1	-	DCs	Intron	STAT1::STAT2,SPIC,EHF,SPIB	INSM1,ZNF135,ELF1,SPIB,FOXO1::ELK1,HOXB2::ELK1	CDK9,BRD4,CEBPA,CEBPB
chr6-134632697-134633823	chr6	134632697	134633823	154092	LINC01010	134377915	134702895	134476630	156629	154092	LINC01010	+	DCs	Intron	ELF3	JDP2,FOSL1::JUN,CDX4,ELF3,FOXO1::ELK1	CDK8,BRD4,TCF3,MYB,RUNX1,LDB1,TCF12,LMO2,CEBPA,LYL1,JMJD1C,KDM1A,NR4A1
chr6-146595896-146596404	chr6	146595896	146596404	79747	ADGB	146571330	146826432	146598965	-2814	79747	ADGB	+	DCs	Exon	SPIC,ETV7,ZKSCAN5,EHF,ELF3,SPIB	ELF3,SPIB,FOXO1::ELK1	TCF3,IRF8,STAG2,CEBPB,KMT2A,CDK9,RELA,MLLT1,BRD4,LDB1,MYB,MLLT3,TCF12,RUNX1,JMJD1C,RAD21,STAT5A,LMO2,CTCF,TRIM24,MED1,CEBPA,KDM1A,LYL1,CDK8,NR4A1,EP300,VDR,BRD2,GABPA,CBFA2T3
chr6-151029886-151030455	chr6	151029886	151030455	25902	MTHFD1L	150817118	151138486	151034532	-4361	25902	MTHFD1L	+	DCs	Intron	SPIC,EHF,SPIB	ZBTB32,SPIB,NKX2-4	CEBPA,LDB1,RUNX1
chr6-154306638-154307160	chr6	154306638	154307160	26034	IPCEF1	154151579	154393643	154330081	23181	26034	IPCEF1	-	DCs	5' UTR	ZKSCAN5,SPIB	JUND,GBX2,NR2C1,SNAI3,ZNF257,TCF12,CREB1,SPIB,TCF3,VAX2
chr6-166603042-166603542	chr6	166603042	166603542	6196	RPS6KA2	166509872	166883184	166627243	23950	6196	RPS6KA2	-	DCs	Intron		FOXD1,INSM1,FOXO4,SNAI3,ZNF135,ZNF85,TCF12,TCF3	BRD4
chr7-19397792-19398299	chr7	19397792	19398299	222894	FERD3L	19131547	19422878	19145421	-252623	222894	FERD3L	-	DCs	Intron	STAT1::STAT2,ETV7,ZKSCAN5,EHF,ELF3,SPIB	JUND,NR2C1,CREB1,ELF1,ELF3,RUNX3,SPIB,POU2F1::SOX2	CDK9,MAX,BRD4,RUNX1,JMJD1C,KMT2A
chr7-39070163-39070663	chr7	39070163	39070663	11281	POU6F2	38955197	39486497	39083561	-13147	11281	POU6F2	+	DCs	Intron	SPIB	NKX2-8,CDX4,SPIB,NKX2-4	MYB,RAD21,JMJD1C,BRD4,LDB1,RUNX1,NR4A1,TCF3,KDM1A,TCF12,IRF8,TRIM24,STAT5A,CEBPA,LMO2,CTCF,BRD2,KMT2A
chr7-80680475-80680991	chr7	80680475	80680991	948	CD36	80557086	80735807	80673376	7356	948	CD36	+	DCs	Distal Intergenic	STAT1::STAT2	SREBF1,SREBF2,NHLH1,POU3F1,ZNF135,ZNF257,MYF5	MLLT1,MYB,BRD4,CDK9,VDR,RUNX1,CEBPB,CEBPA,AR
chr7-82549604-82550104	chr7	82549604	82550104	781	CACNA2D1	81867361	82633194	82443798	-106055	781	CACNA2D1	-	DCs	Distal Intergenic	STAT1::STAT2,ETV7,SPIB	CDX4,ZNF135,ZNF257,SPIB	MYB,IRF8,CDK9,JMJD1C,BRD4,RUNX1,NR4A1,TRIM24
chr7-87143847-87144711	chr7	87143847	87144711	9988	DMTF1	87106031	87152451	87152361	-8081	9988	DMTF1	+	DCs	Distal Intergenic	ETV7,EHF,ELF3	ELK4,SREBF1,SREBF2,FIGLA,CDX4,MSANTD3,ZNF257,ELF1,ELF3,MEF2A,RUNX3,FOXO1::ELK1	CDK9,MYB
chr7-87445835-87446335	chr7	87445835	87446335	5244	ABCB4	87389538	87493288	87431500	-14584	5244	ABCB4	-	DCs	Intron	SPIC,ETV7,ZKSCAN5,EHF,ELF3,SPIB	ELF1,ELF3,ONECUT1,SPIB	VDR,STAT5A,RUNX1,BRD4,MYB,RAD21
chr7-90536406-90536908	chr7	90536406	90536908	5218	CDK14	90436003	91110078	90563774	-27116	5218	CDK14	+	DCs	Intron	STAT1::STAT2,SPIC,ZKSCAN5,SPIB	INSM1,SREBF1,SREBF2,ONECUT1,SPIB	TRIM24,RAD21,CEBPB,CEBPA,IRF8,AR,BRD4,RUNX1,KDM1A,STAT5A,JMJD1C,NR4A1,CDK9,GFI1,LDB1,CTCF,STAG2
chr7-98641665-98642609	chr7	98641665	98642609	4885	NPTX2	98509183	98743306	98619667	22469	4885	NPTX2	+	DCs	Distal Intergenic	SPIC,EHF,ELF3,SPIB	REL,SREBF1,SREBF2,NHLH1,MYF5,TCF12,ELF1,ELF3,SPIB,TCF3,FOXO1::ELK1	TCF3,MYB,TCF12,LMO2,RUNX1,LDB1,STAT5A,TFAP4,JMJD1C,VDR,LYL1,EP300,CEBPA,KDM1A,CEBPB,NR4A1,TRIM24,CDK8,CBFA2T3,MLLT1,BRD4,RELA,RAD21,CTCF,FOS
chr7-104896993-104897496	chr7	104896993	104897496	55904	KMT2E	104671440	105014206	105014179	-116934	55904	KMT2E	+	DCs	Intron		FOXH1,VSX2	CEBPB,AR,BRD4,TRIM24,CDK8,RUNX1,STAT5A,CDK9,JMJD1C,RAD21,RELA,TCF3,CEBPA,LYL1,NR4A1,MYB,VDR
chr7-114051696-114052522	chr7	114051696	114052522	5506	PPP1R3A	113518805	114081123	114075920	23810	5506	PPP1R3A	-	DCs	Intron	SPIC,SPIB	NHLH1,NR2C1,SCRT1,SPIB	CDK9,MYB,MLLT1,STAG2,CDK8,TRIM24,BRD4,IRF8,JMJD1C,MED1,LYL1,RAD21,STAT5A,LDB1,KMT2A,RUNX1,TCF3,LMO2,TCF12,CEBPA,VDR,CEBPB
chr7-115060371-115060876	chr7	115060371	115060876	102724386	LINC01393	115006414	115174783	115078958	-18334	102724386	LINC01393	+	DCs	Intron	SPIC,ZKSCAN5	JUND,POU3F1,ZNF85,MYF5,CREB1,MEF2A	CDK9,MYB,BRD4,TRIM24,CEBPA,CEBPB,RELA,RAD21,AR,STAT5A,STAG2,RUNX1,JMJD1C
chr7-115065998-115066557	chr7	115065998	115066557	102724386	LINC01393	115006414	115174783	115078958	-12680	102724386	LINC01393	+	DCs	Intron		MEIS3,MYF5,OSR2	BRD4,CEBPA,MYB,RUNX1,STAT5A,MLLT3,JMJD1C,KMT2A
chr7-120997832-120998361	chr7	120997832	120998361	79974	CPED1	120978087	121237461	120989799	8296	79974	CPED1	+	DCs	Intron		ZNF135	TFAP4,TCF3,KDM1A,JMJD1C,TCF12,LDB1,RUNX1,GFI1,CEBPB,MYB,CDK9,BRD4,NR4A1,CEBPA,LMO2,CBFA2T3,TRIM24,STAG2,CDK8,RAD21
chr7-122544429-122544929	chr7	122544429	122544929	93664	CADPS2	122371441	122660342	122585761	41081	93664	CADPS2	-	DCs	Intron	ETV7,ZKSCAN5,EHF,ELF3,SPIB	OSR2,ELF1,ELF3,SPIB	CDK9,MAX,CEBPA,BRD4,KDM1A,RUNX1,TRIM24,IRF8,JMJD1C,MYB,STAT5A,LDB1
chr7-132755490-132755990	chr7	132755490	132755990	286023	FLJ40288	132648742	132855796	132659531	96208	286023	FLJ40288	+	DCs	Distal Intergenic		ZNF135,OSR2,RUNX3	NR4A1
chr7-140317505-140318058	chr7	140317505	140318058	84255	SLC37A3	140257431	140401296	140337825	20043	84255	SLC37A3	-	DCs	Intron	STAT1::STAT2,SPIB	NHLH1,MEIS3,MYF5,OSR2,SPIB	MYB,CEBPA,LMO2,BRD4
chr7-143205770-143206451	chr7	143205770	143206451	259286	TAS2R40	143202729	143233065	143222037	-15926	259286	TAS2R40	+	DCs	Distal Intergenic	ETV7,ZKSCAN5,EHF,ELF3,SPIB	ZNF257,OSR2,ELF1,ELF3,RUNX3,SPIB,FOXO1::ELK1,HOXB2::ELK1	MED1,CTCF,CDK8,TCF3,TRIM24,BRD4,VDR,CDK9,MYB,BRD2,LDB1,NR3C1,JUND,KMT2A,RUNX1,MLLT3,KDM1A,STAG2,NR4A1,MLLT1,JMJD1C,AR,CEBPB,LMO2,RAD21,EP300,TCF12,CEBPA,LYL1,IRF8,FOS,CBFA2T3,STAT5A,RELA,GFI1B
chr7-147885804-147886338	chr7	147885804	147886338	26047	CNTNAP2	147508466	148502656	148044592	-158520	26047	CNTNAP2	+	DCs	Intron	ZKSCAN5,SPIB	JDP2,FIGLA,FOSL1::JUN,ZNF135,MEF2A,SCRT2,SPIB	CTCF,AR,STAG2,CEBPA,BRD4,CDK9,CEBPB,RAD21,JMJD1C,RUNX1
chr7-156780588-156781275	chr7	156780588	156781275	64327	LMBR1	156691824	156921476	156796493	15561	64327	LMBR1	-	DCs	Intron	STAT1::STAT2,SPIC,ETV7,ZKSCAN5,EHF,ELF3,SPIB	POU3F1,HIF1A,ZNF135,CREB1,ELF1,ELF3,SPIB,POU2F1::SOX2	KDM1A,MLLT1,TRIM24,BRD4,CDK8,CTCF,RAD21,KMT2A,CDK9,RUNX1,JMJD1C,MYB,NR4A1
chr8-27890102-27890602	chr8	27890102	27890602	100422828	MIR4287	27862106	27936865	27886116	-4235	100422828	MIR4287	-	DCs	Intron		MEF2A,RUNX3	MLLT1,VDR,BRD4,LDB1,RUNX1,STAG2,CDK9,LYL1,JMJD1C,MYB,CBFA2T3,STAT5A,CEBPA,RAD21,LMO2,CTCF
chr8-35897769-35898317	chr8	35897769	35898317	137970	UNC5D	35009755	36010049	35235775	662267	137970	UNC5D	+	DCs	Intron	STAT1::STAT2,ZKSCAN5,SPIB	MSANTD3,ONECUT1,SPIB,ELK1::HOXA1,HOXB2::ELK1	BRD2,BRD4,STAT5A,IRF8,CDK9,JMJD1C,MLLT1,RUNX1,MLLT3,LYL1,TRIM24,RAD21,CEBPA,VDR
chr8-39960954-39961477	chr8	39960954	39961477	169355	IDO2	39929668	40070599	39949166	12048	169355	IDO2	+	DCs	Intron	SPIB	ZNF135,ZNF85,MEF2A,RUNX3,SPIB	IRF8,MYB,CEBPB,RELA,VDR,AR,RUNX1,BRD4,RAD21,KMT2A,TRIM24,CDK9,JMJD1C,STAT5A,CEBPA,STAG2
chr8-51870829-51871442	chr8	51870829	51871442	115294	PCMTD1	51827596	52016165	51860884	-10250	115294	PCMTD1	-	DCs	Intron	STAT1::STAT2,SPIB	JUND,CREB1,SPIB	CTCF,CDK9,BRD4,MLLT1,KMT2A
chr8-65174848-65175358	chr8	65174848	65175358	552859	LINC00251	64989552	65371560	65180341	5237	552859	LINC00251	-	DCs	Intron	STAT1::STAT2,ETV7,ZKSCAN5,EHF,ELF3,SPIB	FOXH1,ELF1,ELF3,SPIB,ELK1::HOXA1,FLI1::DRGX,FOXO1::ELK1,HOXB2::ELK1	KMT2A,LDB1,CDK8,MLLT3,BRD4,CDK9,RUNX1,MED1,TCF12,TRIM24,JMJD1C,VDR,CTCF,STAG2,RAD21,NR4A1,CEBPA,CEBPB,MYB,KDM1A,MLLT1,JUND
chr8-70641730-70642278	chr8	70641730	70642278	51110	LACTB2	70626258	70669269	70644128	2123	51110	LACTB2	-	DCs	Intron	SPIC,ETV7,EHF,ELF3,SPIB	DBP,POU3F1,OSR2,ELF3,MEF2A,SPIB	TCF3,CTCF,LDB1,KDM1A,BRD4,LYL1,JMJD1C,RUNX1,CDK8,STAT5A,CDK9,CEBPA,EP300,LMO2,MLLT3,TCF12,KMT2A,VDR
chr8-76545732-76546233	chr8	76545732	76546233	79776	ZFHX4	76543937	76908335	76681219	-135236	79776	ZFHX4	+	DCs	Intron	STAT1::STAT2,SPIC,ZKSCAN5,EHF,SPIB	FOXD1,VSX2,FOXO4,RUNX3,SPIB	CDK9,MYB,STAG2,TRIM24,CDK8,BRD4,BRD2,VDR,RUNX1,LDB1,IRF8,NR4A1,KMT2A,RAD21,MLLT1,JMJD1C
chr8-86033731-86034231	chr8	86033731	86034231	85481	PSKH2	85766856	86084267	86069697	35715	85481	PSKH2	-	DCs	Intron	ZKSCAN5,SPIB	SREBF1,SREBF2,RUNX3,SPIB,POU2F1::SOX2	LDB1,RELA,JMJD1C,RUNX1,CEBPA,CDK9,TFAP4,KDM1A,CDK8,NR4A1,BRD4,JUND,RAD21,CTCF,CEBPB
chr8-98321763-98322263	chr8	98321763	98322263	79815	NIPAL2	98225176	98360707	98294393	-27619	79815	NIPAL2	-	DCs	Distal Intergenic	ETV7,ZKSCAN5,EHF,ELF3,SPIB	FOXH1,MNT,SOHLH2,ELF3,SPIB	CDK9,RUNX1,VDR,JMJD1C,IRF8,CTCF,BRD4,RAD21,STAG2,CEBPA,FOS,LDB1
chr9-8649175-8649725	chr9	8649175	8649725	5789	PTPRD	8187009	8857953	8633460	-15989	5789	PTPRD	-	DCs	Intron	STAT1::STAT2,ZKSCAN5	FOXD1,JDP2,FOXO4,CDX4
chr9-27634774-27635290	chr9	27634774	27635290	203228	C9orf72	27551615	27934598	27573866	-61165	203228	C9orf72	-	DCs	Distal Intergenic	STAT1::STAT2,SPIB	SPIB,FLI1::DRGX,NKX2-4
chr9-32906174-32906700	chr9	32906174	32906700	54840	APTX	32885631	33025189	32987762	81324	54840	APTX	-	DCs	Intron	STAT1::STAT2	OLIG3,SCRT1,SCRT2
chr9-82247235-82247762	chr9	82247235	82247762	389763	SPATA31D1	81966180	82525958	81988788	258709	389763	SPATA31D1	+	DCs	Intron	SPIC,ETV7,EHF,ELF3	GBX2,ELF3,RUNX3,FLI1::DRGX,FOXO1::ELK1,HOXB2::ELK1,POU2F1::SOX2,EN2
chr10-26528916-26529425	chr10	26528916	26529425	54518	APBB1IP	26328199	26575904	26561943	-32772	54518	APBB1IP	+	DCs	Intron	STAT1::STAT2,SPIB	MSANTD3,OSR2,TCF12,SPIB,TCF3,FLI1::DRGX,POU2F1::SOX2	BRD4,AR
chr10-49362401-49362914	chr10	49362401	49362914	644168	DRGX	49347363	49433148	49395451	32793	644168	DRGX	-	DCs	Distal Intergenic	STAT1::STAT2,SPIC,ETV7,ZKSCAN5,EHF,ELF3,SPIB	NHLH1,ELF3,RUNX3,SPIB,POU2F1::SOX2	TRIM24,RAD21,IRF8,BRD4,MLLT1,RUNX1,STAG2,JMJD1C,CDK8,KMT2A,VDR
chr10-51273521-51274022	chr10	51273521	51274022	693190	MIR605	51226427	51499582	51299573	-25801	693190	MIR605	+	DCs	Intron	STAT1::STAT2,EHF,ELF3,SPIB	ZNF85,OSR2,ELF3,ONECUT1,SPIB,POU2F1::SOX2	CEBPA,CEBPB,IRF8,BRD4,RUNX1,TRIM24,LDB1,KDM1A
chr10-60074145-60074645	chr10	60074145	60074645	288	ANK3	60002859	60755910	60072569	-1825	288	ANK3	-	DCs	Exon	ZKSCAN5,EHF,SPIB	MEIS3,ELF1,SPIB,NKX2-4	CDK9
chr10-60093245-60093745	chr10	60093245	60093745	288	ANK3	60002859	60755910	60088358	-5136	288	ANK3	-	DCs	Intron	SPIB	ZBTB32,MEF2A,SPIB,ELK1::HOXA1	CEBPA,BRD4,NR3C1,IRF8
chr10-81021351-81021851	chr10	81021351	81021851	387694	SH2D4B	80526685	81259155	80642996	378604	387694	SH2D4B	+	DCs	Distal Intergenic	SPIC	POU2F1::SOX2	BRD2,CEBPB,TCF3,CEBPA,RUNX1,CDK8,LMO2,LDB1,BRD4,TRIM24,JMJD1C,TCF12,CDK9,CTCF,RAD21,STAG2,CBFA2T3
chr10-83990084-83990584	chr10	83990084	83990584	27069	GHITM	83469592	84156620	84139440	-149105	27069	GHITM	+	DCs	Distal Intergenic	SPIC,ETV7,ZKSCAN5,EHF,ELF3,SPIB	ELF1,ELF3,SPIB,FOXO1::ELK1	CDK8,KMT2A,MLLT3,STAG2,RAD21,IRF8,CDK9,JMJD1C,TRIM24,RUNX1,CEBPA,BRD4,MAX,CEBPB,VDR,AR,MYB
chr10-93715264-93715764	chr10	93715264	93715764	118924	FRA10AC1	93667074	93730190	93702572	-12941	118924	FRA10AC1	-	DCs	Distal Intergenic	EHF,ELF3,SPIB	ELF1,ELF3,RUNX3,SPIB
chr10-99233905-99234441	chr10	99233905	99234441	60495	HPSE2	99080186	99282480	99235802	1628	60495	HPSE2	-	DCs	Intron	STAT1::STAT2,SPIC	HINFP,NHLH1,ZNF257,MEF2A,FOXO1::ELK1	TRIM24,MYB,CEBPA,MLLT1,KMT2A,IRF8,MLLT3,KDM1A,RUNX1,CDK9,BRD2,BRD4,STAT5A,VDR,MAX,GABPA,JMJD1C,CEBPB,CDK8,RAD21,CTCF,STAG2
chr11-6772460-6772966	chr11	6772460	6772966	338755	OR2AG2	6726229	6777036	6769055	-3657	338755	OR2AG2	-	DCs	Promoter	STAT1::STAT2,SPIC,EHF,ELF3,SPIB	NHLH1,MSANTD3,SNAI3,OSR2,TCF12,CREB1,ELF1,ELF3,MEF2A,SPIB,TCF3,ELK1::HOXA1,FLI1::DRGX,FOXO1::ELK1,HOXB2::ELK1	BRD4,LDB1,TFAP4,RUNX1,CEBPB,CDK8,AR,CEBPA,JMJD1C,TRIM24
chr11-14270571-14271736	chr11	14270571	14271736	10418	SPON1	13841297	14279153	14262447	8705	10418	SPON1	+	DCs	Intron	STAT1::STAT2,SPIC,ETV7,ZKSCAN5,ELF3,SPIB	TBX15,TBX1,FIGLA,ZNF257,ELF1,ELF3,MEF2A,RUNX3,SCRT1,SPIB,HOXB2::ELK1,TBX21	KMT2A,CDK9,MYB,CEBPB,TCF3,LDB1,JMJD1C,CDK8,BRD4,CEBPA,RUNX1,TCF12,CBFA2T3,TRIM24,KDM1A,LYL1,LMO2,GFI1,RAD21,MLLT3,NR4A1,GFI1B,EP300,TFAP4,JUND,STAT5A,MED1,BRD2,VDR,CTCF
chr11-34154270-34154932	chr11	34154270	34154932	55226	NAT10	34100882	34192266	34141987	12613	55226	NAT10	+	DCs	Exon	STAT1::STAT2,ZKSCAN5,SPIB	NHLH1,ELF1,SPIB	TCF3,MLLT1,RUNX1,VDR,BRD4,CEBPA,LDB1,RAD21,IRF8,LMO2,TFAP4,KDM1A,BRD2,JMJD1C,MYB,TCF12,STAT5A,CDK9,JUND,CBFA2T3,NR4A1,CTCF
chr11-42410488-42410988	chr11	42410488	42410988	102723644	LINC01499	41587171	42516203	41720443	690294	102723644	LINC01499	+	DCs	Distal Intergenic	STAT1::STAT2,EHF,ELF3,SPIB	ELF1,ELF3,SPIB	BRD4,RAD21,NR3C1,NCOA2,TRIM24,CDK8,CDK9,IRF8,NR4A1
chr11-82557178-82557714	chr11	82557178	82557714	101928989	MIR4300HG	81995440	82725973	82403913	-153532	101928989	MIR4300HG	-	DCs	Intron	STAT1::STAT2,ETV7,EHF,ELF3,SPIB	POU3F1,ZNF257,ELF3,SPIB	CDK9,CDK8,IRF8,STAG2,RAD21,BRD4,RUNX1,TRIM24,VDR,CTCF,STAT5A,MYB,MLLT3,JMJD1C,RELA,AR,CEBPA
chr11-88435378-88435878	chr11	88435378	88435878	1075	CTSC	88238129	88692578	88337787	-97840	1075	CTSC	-	DCs	Distal Intergenic	STAT1::STAT2,SPIC,SPIB	NKX2-8,OLIG3,SNAI3,MEF2A,SPIB,FOXO1::ELK1	MLLT1,BRD4,CDK9,AR
chr11-94922577-94923411	chr11	94922577	94923411	51503	CWC15	94917542	94973646	94970255	47260	51503	CWC15	-	DCs	Intron	SPIB	FOXD1,SREBF1,FOXO4,MYF5,OSR2,TCF12,RUNX3,SPIB,TCF3,FOXO1::ELK1	KDM1A,BRD2,LDB1,BRD4,NR4A1,TCF3,TFAP4,RUNX1,LMO2,KMT2A
chr11-95249084-95249619	chr11	95249084	95249619	143686	SESN3	95160429	95505872	95232541	-16809	143686	SESN3	-	DCs	Distal Intergenic	STAT1::STAT2,SPIC,SPIB	ZBTB32,ELF1,SPIB	BRD2,BRD4,KMT2A,JMJD1C,MLLT3,CDK9,TCF3,RUNX1
chr11-107824820-107825479	chr11	107824820	107825479	54733	SLC35F2	107789128	107928398	107858561	33411	54733	SLC35F2	-	DCs	Intron	STAT1::STAT2,SPIC,SPIB	INSM1,NKX2-8,POU3F1,FOSL1::JUN,ZNF135,OSR2,MEF2A,SPIB,POU2F1::SOX2,NKX2-4	STAG2,CTCF,CEBPA,RELA,CEBPB,VDR,JMJD1C,CDK8,CDK9,RUNX1,TRIM24,LDB1,LYL1,BRD4,RAD21,STAT5A,FOS
chr11-112179532-112180071	chr11	112179532	112180071	83875	BCO2	112171420	112221237	112176400	3400	83875	BCO2	+	DCs	3' UTR	STAT1::STAT2,SPIB	OSR2,RUNX3,SPIB	TCF3,STAG2,RUNX1,TCF12,BRD4,JMJD1C,MYB,RAD21,MLLT3,LDB1,CDK9,VDR,LMO2,CEBPB,NR3C1,NR4A1,TFAP4,CEBPA,IRF8,AR,CBFA2T3,RELA,KDM1A,KMT2A
chr11-123263679-123264198	chr11	123263679	123264198	79827	CLMP	123073484	123288396	123195281	-68656	79827	CLMP	-	DCs	Distal Intergenic	STAT1::STAT2,SPIB	NHLH1,ZNF135,SPIB	MYB,IRF8,JMJD1C,LYL1,TRIM24,RAD21,CDK8,VDR,RUNX1,BRD4,CDK9,CEBPA,BRD2,KMT2A,CTCF,MED1
chr11-130995205-130995705	chr11	130995205	130995705	399979	SNX19	130873352	131143493	130916509	-78945	399979	SNX19	-	DCs	Distal Intergenic	ZKSCAN5,ELF3,SPIB	NKX2-8,TBX15,TBX1,MNT,SOHLH2,HOXB5,ELF3,ONECUT1,RUNX3,SPIB,ELK1::HOXA1,HOXB2::ELK1,TBX21	CDK9,MYB,BRD4,RAD21,JMJD1C,IRF8,LYL1,RUNX1,CEBPA,VDR,STAT5A,BRD2
chr12-15453499-15453999	chr12	15453499	15453999	5800	PTPRO	15447476	15613491	15546352	-92602	5800	PTPRO	+	DCs	Intron	STAT1::STAT2,EHF,SPIB	POU3F1,OSR2,RUNX3,SPIB	CEBPB,CEBPA,RUNX1,BRD4,JMJD1C,LDB1,STAT5A,CDK9,TRIM24
chr12-15526981-15527501	chr12	15526981	15527501	5800	PTPRO	15447476	15613491	15546352	-19110	5800	PTPRO	+	DCs	Intron	STAT1::STAT2	SCRT1,SCRT2	MYB,CDK9,TRIM24,RAD21,BRD4,CEBPA,LDB1,LMO2
chr12-42056068-42056598	chr12	42056068	42056598	283464	GXYLT1	41954468	42172211	42144712	88378	283464	GXYLT1	-	DCs	Distal Intergenic	STAT1::STAT2,SPIC,ETV7,ZKSCAN5,EHF,ELF3,SPIB	FOXD1,SREBF1,NHLH1,FOXO4,CDX4,ZNF135,ELF1,ELF3,SPIB,FLI1::DRGX,HOXB2::ELK1	CTCF,TCF12,TRIM24,CDK9,RAD21,IRF8,MYB,VDR,LDB1,BRD4,KDM1A,MLLT3,MED1,CEBPA,CEBPB,MLLT1,RUNX1,JMJD1C,RELA,NR4A1,CDK8,STAG2
chr12-47871714-47872214	chr12	47871714	47872214	7421	VDR	47858034	47953308	47882935	10970	7421	VDR	-	DCs	Intron	SPIC	FOXO1::ELK1	BRD4,KDM1A
chr12-59472191-59472726	chr12	59472191	59472726	9194	SLC16A7	59258295	60798146	59596067	-123608	9194	SLC16A7	+	DCs	Distal Intergenic		SREBF2,MSANTD3	TCF3,RUNX1,TCF12,LDB1,CDK9
chr12-64293934-64294434	chr12	64293934	64294434	115749	C12orf56	64246435	64397771	64293383	-800	115749	C12orf56	-	DCs	Intron	STAT1::STAT2	POU3F1,MEF2A	BRD4,TRIM24,CEBPB,RAD21,CDK9,IRF8,CEBPA,STAT5A,JMJD1C
chr12-65296413-65296913	chr12	65296413	65296913	253827	MSRB3	65262097	65584132	65278987	17675	253827	MSRB3	+	DCs	Intron	STAT1::STAT2,SPIC,ETV7,ZKSCAN5,EHF,ELF3,SPIB	ELK4,FLI1,ETS1,ELF1,ELF3,MEF2A,SPIB,FOXO1::ELK1	BRD4,VDR,IRF8,JMJD1C,RAD21,CDK9,CDK8,KDM1A
chr12-69325021-69325530	chr12	69325021	69325530	4069	LYZ	69299759	69354044	69348341	-23065	4069	LYZ	+	DCs	Distal Intergenic	STAT1::STAT2,SPIC,ETV7,EHF,ELF3,SPIB	FOXD1,ELK4,NKX2-8,POU3F1,FOXO4,ZNF85,ELF1,ELF3,RUNX3,SPIB	KMT2A,MLLT3,LDB1,BRD4,TCF3,RUNX1,CDK9,RAD21,MYB,AR,JMJD1C,CEBPA
chr12-70317711-70318372	chr12	70317711	70318372	4848	CNOT2	70243386	70356935	70319024	-982	4848	CNOT2	+	DCs	Exon	STAT1::STAT2,SPIB	CDX4,MEF2A,SPIB,FOXO1::ELK1	MLLT1,AR,RUNX1,BRD4,TRIM24,CDK9,RAD21,JMJD1C,MYB,TCF3,LMO2,CDK8,LDB1,STAT5A
chr12-77060356-77060925	chr12	77060356	77060925	144455	E2F7	76964901	77448242	77065550	4909	144455	E2F7	-	DCs	Intron	SPIC,ETV7,EHF,ELF3,SPIB	FOXH1,ELK4,SREBF1,ELF1,ELF3,SPIB,FOXO1::ELK1	MLLT1,BRD4,TRIM24,KDM1A,CTCF,TCF3,MYB,AR,KMT2A,STAG2,VDR,LDB1,JMJD1C,TCF12,RUNX1,LMO2,RAD21,CDK9,CEBPB,CEBPA,STAT5A,MLLT3,BRD2,NR4A1
chr12-78457901-78458401	chr12	78457901	78458401	105369860	LINC02424	78279453	78611869	78359746	-98404	105369860	LINC02424	-	DCs	Intron	ETV7,ZKSCAN5,EHF,ELF3,SPIB	FOXD1,NKX2-8,FOXO4,FOSL1::JUN,ELF1,ELF3,SPIB,NKX2-4	BRD4,KDM1A,FOS,MYB,JMJD1C,CDK9,LDB1,GFI1B,AR,RUNX1,JUND,CEBPA,NR4A1,RAD21
chr12-93060209-93060729	chr12	93060209	93060729	102724933	LINC02412	93051849	93276124	93174366	-113896	102724933	LINC02412	+	DCs	Intron	STAT1::STAT2,SPIC,SPIB	JUND,NR2C1,SNAI3,ZBTB32,ZNF135,TCF12,CREB1,SPIB,TCF3,FOXO1::ELK1	RAD21,CDK9,STAG2,TRIM24,AR,CDK8,BRD4,JMJD1C,CEBPA,CEBPB
chr12-100567154-100567663	chr12	100567154	100567663	283431	GAS2L3	100538569	100664813	100573683	-6274	283431	GAS2L3	+	DCs	Distal Intergenic	ETV7,ZKSCAN5,SPIB	MNT,SOHLH2,ONECUT1,SPIB	CTCF,AR,BRD4,CDK9,CEBPA,CEBPB,RAD21,MYB,MLLT3,RUNX1,JMJD1C,VDR
chr12-100699162-100699662	chr12	100699162	100699662	121601	ANO4	100664814	101129197	100717526	-18113	121601	ANO4	+	DCs	Distal Intergenic	STAT1::STAT2,SPIB	FOXH1,ZNF257,SPIB,POU2F1::SOX2	TRIM24,VDR,STAG2,LDB1,BRD4,CDK9,STAT5A,RUNX1,RAD21,TCF3,JMJD1C,MED1,CEBPA,CDK8,LYL1,IRF8,MYB,CEBPB,NR4A1,LMO2,CBFA2T3
chr12-105358698-105359231	chr12	105358698	105359231	387882	C12orf75	105328827	105528856	105353509	5454	387882	C12orf75	+	DCs	Intron	STAT1::STAT2,SPIC	INSM1,MYF5	CDK9,VDR,MLLT1,MYB,GFI1,IRF8,TRIM24,RUNX1,STAG2,MLLT3,LYL1,JMJD1C,RAD21,RELA,BRD4,CEBPA,CTCF,STAT5A,CEBPB
chr12-132481673-132482541	chr12	132481673	132482541	57666	FBRSL1	132409451	132577262	132489551	-7443	57666	FBRSL1	+	DCs	Distal Intergenic	STAT1::STAT2,ZKSCAN5,EHF,ELF3,SPIB	INSM1,NHLH1,FIGLA,ZNF135,TCF12,ELF1,ELF3,SPIB,TCF3,FLI1::DRGX	BRD4,KDM1A,TCF3,AR,RELA,KMT2A,BRD2,LMO2,MYB,CTCF
chr13-43401250-43401750	chr13	43401250	43401750	55068	ENOX1	43259999	43409915	43361365	-40134	55068	ENOX1	-	DCs	Intron	STAT1::STAT2,SPIB	ZBTB32,ZNF257,SCRT2,SPIB	IRF8,CDK9,MLLT1,JMJD1C,BRD4,RAD21,MYB,VDR,RUNX1
chr13-58953614-58954114	chr13	58953614	58954114	106144531	LINC00374	58199473	58964655	58233117	-720746	106144531	LINC00374	-	DCs	Distal Intergenic	STAT1::STAT2,SPIB	MEIS3,MSANTD3,NR2C1,SNAI3,MYF5,ONECUT1,SPIB	BRD4,LDB1,MED1,TCF3,CDK8,TRIM24,TCF12,RUNX1,CEBPA,MYB,GFI1B,CDK9,LMO2,JMJD1C,NR4A1,LYL1,IRF8,EP300,VDR,MLLT3,KDM1A,CEBPB,STAT5A,RAD21,GFI1,CBFA2T3
chr13-72218950-72219450	chr13	72218950	72219450	1602	DACH1	71440956	72297439	71867192	-352007	1602	DACH1	-	DCs	Distal Intergenic	STAT1::STAT2,ETV7,EHF,ELF3,SPIB	FOXH1,SREBF1,SREBF2,ZNF85,ELF1,ELF3,MEF2A,SPIB	AR,CEBPB,RAD21,NR3C1,IRF8,RELA,BRD4,JMJD1C,CEBPA
chr13-76213240-76213740	chr13	76213240	76213740	104326189	LMO7DN-IT1	75873963	76381638	75876886	336603	104326189	LMO7DN-IT1	+	DCs	Distal Intergenic	STAT1::STAT2,SPIC,EHF	SREBF2,NHLH1,TCF12,RUNX3,TCF3,FOXO1::ELK1	JMJD1C,IRF8,RAD21,MLLT3,CEBPA
chr13-80873469-80874041	chr13	80873469	80874041	103724386	LINC00377	80692311	81135326	81043670	-169914	103724386	LINC00377	+	DCs	Intron	STAT1::STAT2,SPIB	JUND,ZNF257,SPIB	TCF3,LDB1,JUND,MYB,TCF12,AR,RUNX1,RAD21,FOS,LMO2,BRD4,GFI1,CTCF,CEBPB,LYL1,JMJD1C,TRIM24,STAG2,NR3C1,CEBPA,KDM1A,RELA,EP300,NR4A1,KMT2A,CDK9,CDK8,STAT5A,VDR,CBFA2T3,BRD2
chr13-91278830-91279330	chr13	91278830	91279330	407975	MIR17HG	91239614	91349273	91347820	-68739	407975	MIR17HG	+	DCs	Distal Intergenic	ELF3,SPIB	FIGLA,GBX2,CDX4,SNAI3,ELF1,ELF3,SPIB,FOXO1::ELK1,EN2	TCF3,CDK9,RUNX1,TCF12,BRD4,LMO2,EP300,MYB,LDB1,CTCF,TRIM24,CEBPA,VDR,LYL1,JMJD1C,STAT5A,FOS,NR4A1,JUND,MLLT1,CBFA2T3
chr13-97854350-97854850	chr13	97854350	97854850	3843	IPO5	97694065	98081070	97953658	-99057	3843	IPO5	+	DCs	Distal Intergenic	STAT1::STAT2,SPIC,ETV7,EHF,ELF3,SPIB	JUND,OLIG3,FOXO4,SNAI3,ZNF135,TCF12,ELF1,ELF3,MEF2A,SCRT2,SPIB,TCF3,FOXO1::ELK1	CDK8,TRIM24,FOS,CDK9,NR4A1,BRD4,MYB,LDB1,JMJD1C,IRF8,TCF3,RUNX1,AR,KDM1A
chr14-84128993-84129493	chr14	84128993	84129493	105370605	LINC02329	83505169	85390577	85387275	-1258031	105370605	LINC02329	+	DCs	Intron	SPIC,ETV7,ZKSCAN5,EHF,ELF3,SPIB	MSANTD3,SNAI3,TCF12,ELF1,ELF3,SPIB,TCF3,FOXO1::ELK1,POU2F1::SOX2	CDK8,KDM1A,CTCF,MED1,BRD4,MLLT1,CDK9,MLLT3,STAG2,KMT2A,TRIM24,RUNX1,LDB1,MYB,JMJD1C,IRF8,NR4A1,RAD21,JUND,STAT5A,CEBPA,LMO2,GABPA
chr15-25793220-25793830	chr15	25793220	25793830	100616474	MIR4715	25771826	25856016	25848825	55299	100616474	MIR4715	-	DCs	Intron	STAT1::STAT2,ETV7,ZKSCAN5,EHF,SPIB	INSM1,TBX15,NR2C1,OSR2,SPIB,NKX2-4	STAG2,CDK9,CDK8,BRD4,MYB,BRD2,STAT5A,MLLT3,MLLT1,TRIM24,IRF8,NR3C1,JMJD1C,CEBPA,CEBPB,VDR,RUNX1,RELA,NCOA2,LYL1,RAD21,CTCF,NR4A1,MED1,KMT2A
chr15-60635461-60636260	chr15	60635461	60636260	6095	RORA	60495629	60654516	60627463	-8396	6095	RORA	-	DCs	Promoter	ETV7,EHF,ELF3,SPIB	ELK4,FLI1,CUX2,ETS1,CDX4,SNAI3,ELF1,ELF3,ONECUT1,SPIB,FOXO1::ELK1	JMJD1C,AR,CDK9,IRF8,TRIM24,BRD4,RAD21,MLLT1,MYB,RUNX1
chr15-97844098-97844859	chr15	97844098	97844859	91948	LINC00923	97697909	97917624	97874005	29526	91948	LINC00923	-	DCs	Intron	STAT1::STAT2,ZKSCAN5,EHF,ELF3,SPIB	FOXD1,POU3F1,FOXO4,ZBTB32,ZNF85,ELF1,ELF3,MEF2A,SPIB,FLI1::DRGX	KMT2A,VDR
chr15-98147368-98147868	chr15	98147368	98147868	101927332	LINC01582	98024754	98292246	98103712	-43905	101927332	LINC01582	-	DCs	Intron	SPIC,ZKSCAN5,SPIB	SPIB	TCF3,MLLT3,LDB1,MYB,CDK8,LMO2,KMT2A,RUNX1,TCF12,CEBPB,BRD4,VDR,MED1,CTCF,CBFA2T3,JMJD1C,RAD21,BRD2,KDM1A,LYL1,CEBPA,TRIM24,STAG2,JUND,IRF8
chr16-47392087-47392607	chr16	47392087	47392607	81533	ITFG1	47191367	47460146	47396220	3872	81533	ITFG1	-	DCs	Intron	ETV7,ZKSCAN5,EHF,ELF3,SPIB	ZNF135,ZNF257,ELF1,ELF3,RUNX3,SPIB	LDB1,CEBPB,TCF3,RUNX1,BRD4,IRF8,CDK8,STAG2,TRIM24,TCF12,JMJD1C,CBFA2T3,MYB,KDM1A,JUND,BRD2,CEBPA,LMO2,VDR,STAT5A,CDK9,RAD21,KMT2A,EP300,NR4A1,TFAP4,CTCF
chr16-58425930-58426555	chr16	58425930	58426555	64785	GINS3	58343721	58427772	58392698	33543	64785	GINS3	+	DCs	Intron	ETV7,ZKSCAN5,EHF,ELF3,SPIB	TBX15,TBX1,FIGLA,SNAI3,ZNF135,ZNF85,ELF1,ELF3,SPIB	TCF3,AR,MYB,NR3C1,BRD4,MLLT1,LDB1,RUNX1,TCF12,LMO2,FOS,JMJD1C,STAG2,CDK9,KDM1A,VDR,GFI1,TFAP4,GFI1B,NR4A1,LYL1,STAT5A,EP300,TRIM24,BRD2,CDK8,CEBPA,CBFA2T3,CTCF,CEBPB,RAD21,NCOA2,JUND
chr18-8525544-8526044	chr18	8525544	8526044	201475	RAB12	8504574	8669260	8609445	-83650	201475	RAB12	+	DCs	Distal Intergenic	EHF,ELF3,SPIB	OSR2,ELF1,ELF3,MEF2A,ONECUT1,SPIB,FOXO1::ELK1	RUNX1,MLLT1,BRD4,LDB1,KDM1A,TFAP4,STAT5A,TCF12,LMO2,CBFA2T3,CEBPA,CEBPB,RAD21,CTCF,VDR,STAG2,TCF3
chr18-31791639-31792223	chr18	31791639	31792223	147407	SLC25A52	31723359	31796737	31760880	-31050	147407	SLC25A52	-	DCs	Distal Intergenic	SPIC,EHF,ELF3	HOXD12,FOSL1::JUN,ZNF257,MYF5,ELF1,ELF3,SCRT2,POU2F1::SOX2	FOS,AR,VDR,NR4A1,RELA,MLLT1,KDM1A,LDB1,LMO2,CDK8,CDK9,RUNX1,JMJD1C,EP300,MYB,CEBPA,STAT5A,BRD4,CEBPB,RAD21,TCF12,TRIM24,TCF3,LYL1,CTCF,STAG2,GFI1,KMT2A
chr18-39317950-39318520	chr18	39317950	39318520	647946	MIR924HG	38498887	39508679	39340638	22402	647946	MIR924HG	-	DCs	Exon	STAT1::STAT2,EHF,SPIB	JDP2,SPIB	IRF8,CDK9,RUNX1,STAT5A,BRD4,TRIM24,AR,VDR,NR4A1
chr18-68722712-68723252	chr18	68722712	68723252	79839	CCDC102B	68715306	69123725	68715313	7668	79839	CCDC102B	+	DCs	Intron	SPIC,ZKSCAN5,EHF,ELF3,SPIB	REL,NHLH1,MYF5,ELF3,MEF2A,SPIB,FOXO1::ELK1	BRD4,TRIM24
chr18-70135546-70136084	chr18	70135546	70136084	25914	RTTN	69990839	70247423	70109693	-26121	25914	RTTN	-	DCs	Intron	STAT1::STAT2,EHF,SPIB	FOXH1,MSANTD3,HOXB5,SPIB,VAX2	NR4A1,STAT5A,FOS,BRD4,CDK9,JMJD1C,AR
chr18-74334365-74334982	chr18	74334365	74334982	644041	C18orf63	74303915	74362630	74315813	18859	644041	C18orf63	+	DCs	Intron	STAT1::STAT2,SPIC,ZKSCAN5,SPIB	FOXO4,ZBTB32,ZNF257,ZNF85,SPIB	CDK9,IRF8,MYB,RUNX1,JMJD1C,BRD4,GFI1
chr18-75307413-75307913	chr18	75307413	75307913	10194	TSHZ1	75210052	75336105	75244576	63086	10194	TSHZ1	+	DCs	Distal Intergenic	SPIC,ETV7,EHF,ELF3,SPIB	SNAI3,ZNF135,ZNF257,ELF1,ELF3,MEF2A,SPIB,FOXO1::ELK1	TRIM24,NR3C1,CTCF,JMJD1C,AR,CEBPA
chr20-9491183-9491683	chr20	9491183	9491683	24141	LAMP5	9442661	9676596	9514358	-22924	24141	LAMP5	+	DCs	Intron	ETV7,ZKSCAN5,EHF,ELF3,SPIB	MSANTD3,NR2C1,ZBTB32,ELF1,ELF3,SPIB
chr20-9615986-9616524	chr20	9615986	9616524	24141	LAMP5	9442661	9676596	9514361	101893	24141	LAMP5	+	DCs	Intron	STAT1::STAT2,SPIC,EHF,ELF3,SPIB	CREB1,ELF1,ELF3,SPIB,FLI1::DRGX,HOXB2::ELK1	KMT2A,BRD4,TRIM24,RUNX1,IRF8,MYB,CDK8,JMJD1C,STAT5A,AR
chr20-12203940-12204440	chr20	12203940	12204440	22903	BTBD3	11880720	12435952	11921566	282623	22903	BTBD3	+	DCs	Distal Intergenic	STAT1::STAT2	MEF2A,POU2F1::SOX2	RAD21,CDK9,CDK8,BRD4,STAG2,IRF8
chr21-16264286-16264811	chr21	16264286	16264811	388815	MIR99AHG	15973260	16538216	16231079	33468	388815	MIR99AHG	+	DCs	Promoter	STAT1::STAT2,SPIC,EHF,ELF3,SPIB	ZNF85,ELF3,MEF2A,SPIB	CDK8,CEBPB,BRD4,MLLT1,JMJD1C,CEBPA
chr21-25903579-25904128	chr21	25903579	25904128	351	APP	25816829	26372152	25897983	-5869	351	APP	-	DCs	Intron	STAT1::STAT2,ETV7,SPIB	MEIS3,TBX1,NR2C1,MYF5,SPIB	RUNX1,IRF8,CDK8,KMT2A,AR,BRD4,CDK9,JMJD1C,MYB,TRIM24,STAT5A,FOS,RAD21,CTCF
chrX-148069709-148070209	chrX	148069709	148070209	158521	FMR1NB	147963012	148253717	148006816	63142	158521	FMR1NB	+	DCs	Distal Intergenic	STAT1::STAT2,SPIC,SPIB	OSR2,SPIB
chr1-24748338-24749169	chr1	24748338	24749169	25932	CLIC4	24707471	24832412	24745409	3343	25932	CLIC4	+	Bcells	Intron	STAT1::STAT2,SPIC,NFKB1,NFKB2,POU3F2,POU3F4,POU5F1B,FIGLA,POU5F1,ZEB1,POU2F3,POU2F2	RELA,STAT1::STAT2,SPIC,MEF2D,NFKB2,POU5F1B,RUNX2,FIGLA,SOX15,ZNF136,ZNF140,CEBPA	BCOR,BCL6,CTCF,FOXO1,FOXP1,IKZF1,CHD4,POU2F2,IRF4,NCOR2
chr1-30750769-30751359	chr1	30750769	30751359	7805	LAPTM5	30742731	30818280	30746229	-4834	7805	LAPTM5	-	Bcells	Intron	MGA,TBX15,TFAP2A,ASCL1,EBF3,ZKSCAN5,EBF1,EHF,ELF1,ELF3,GABPA,MYOG,TBX3	ELF4,NHLH1,TGIF2LX,ZKSCAN5,EHF,GABPA,TBX21,TBX3	IKZF3,BCOR,IKZF1,FOXP1,MTA2,BCL6,IRF4,NCOR2,CTCF,SPI1,FOXO1,KMT2B,STAT3
chr1-37288826-37289346	chr1	37288826	37289346	100422898	MIR4255	37097847	37317987	37161563	127522	100422898	MIR4255	+	Bcells	Intron	IKZF1,ZKSCAN5,EHF,ELF1,ELF3,GABPA,SPIB,TCF4	ESRRB,IKZF1,ZKSCAN5,EHF,ESRRA,GABPA,FOXO1::ELF1,FOXO1::FLI1,ZNF416	FOXP1,FOXO1,MTA2,IKZF1,STAT3,IRF4,BACH2,BCL6,BCOR,SPI1,IKZF3
chr1-100184530-100185030	chr1	100184530	100185030	127495	LRRC39	100160562	100214046	100178273	-6506	127495	LRRC39	-	Bcells	Distal Intergenic	SPIC,NFKB1,NFKB2,PAX1,PAX9,ZKSCAN5,PAX2	SPIC,NFKB2,ZKSCAN5,TWIST1	STAT3
chr1-153598714-153599335	chr1	153598714	153599335	140576	S100A16	153588107	153614541	153608322	9297	140576	S100A16	-	Bcells	Intron	POU3F1,POU3F2,POU3F3,NHLH2,ASCL1,EBF3,MYF5,ZKSCAN5,ELF1,ELF3,GABPA,MYOD1,MYOG,TCF4,POU1F1	LBX2,EVX1,RARA::RXRG,NHLH2,ZNF140,LHX9,ZKSCAN5,GABPA	IKZF1,IKZF3,MTA2,HDAC2,BCL6,POU2F2,CHD4,BCOR,SPI1,STAT3,FOXP1,IRF4
chr1-157806689-157807338	chr1	157806689	157807338	115350	FCRL1	157787477	157830951	157804201	-2811	115350	FCRL1	-	Bcells	Exon	MSC,IKZF1,SNAI1,ASCL1,ETV7,EBF3,MYF5,ZKSCAN5,EHF,ELF1,ELF3,GABPA,MYOD1,MYOG,SPIB,TCF4	RELA,ELF4,NHLH1,SPDEF,ELK1,IKZF1,SNAI1,TGIF2LX,HES2,ZKSCAN5,EHF,GABPA	BCL6,IRF4,FOXP1,BCOR,NCOR2,STAT3,FOXO1,SPI1
chr1-160789620-160790720	chr1	160789620	160790720	4063	LY9	160773249	160826844	160796074	-5903	4063	LY9	+	Bcells	Distal Intergenic	STAT1::STAT2,ZEB1,IKZF1,SNAI1,SNAI3,EBF3,TCF12,ZKSCAN5,EBF1,EHF,ELF1,ELF3,GABPA,SNAI2,SPIB,TCF3,TCF4	STAT1::STAT2,IKZF1,SNAI1,HES2,ZKSCAN5,CREB1,EHF,GABPA,MITF,SNAI2,FOXO1::ELF1,FOXO1::FLI1,CDX1	STAT3,IRF4,FOXO1,BCL6,BCOR,SPI1,NCOR2
chr1-172818216-172819712	chr1	172818216	172819712	356	FASLG	172633666	172855053	172659144	159819	356	FASLG	+	Bcells	Intron	STAT1::STAT2,SPIC,POU3F1,ETV7,EBF3,ZKSCAN5,EBF1,EHF,ELF1,ELF3,GABPA,SPIB,POU2F2,POU1F1	STAT1::STAT2,SPIC,TBX5,FOSL2::JUNB,FOSL2::JUND,ZNF136,HES2,ZKSCAN5,ZNF449,EHF,GABPA	IKZF1,MTA2,IKZF3,FOXP1,SPI1,BCOR,NCOR2,CTCF,BACH2,FOXO1,BCL6,CHD4,IRF4,HDAC2,KMT2B,STAT3,POU2F2,POU2AF1
chr1-175225491-175225991	chr1	175225491	175225991	9674	KIAA0040	175122081	175299681	175192999	-32741	9674	KIAA0040	-	Bcells	Distal Intergenic	NFKB1,NFKB2,POU5F1B,ZEB1,SNAI3,MYOD1,POU2F3,SNAI2,SPIB	RELA,NFKB2,POU5F1B,ZNF136,SNAI2	BCL6,FOXO1,BCOR,BACH2,FOXP1,NCOR2,STAT3,CTCF
chr1-178605887-178606449	chr1	178605887	178606449	400798	C1orf220	178531791	178610272	178542796	63371	400798	C1orf220	+	Bcells	Distal Intergenic	MGA,TBX15,FIGLA,NHLH2,ASCL1,MYF5,EBF1,MYOD1,MYOG	NHLH1,MEF2D,TBX5,FIGLA,NHLH2,NR1D1,MITF	BCOR,IKZF3,BCL6,IKZF1,FOXP1,MTA2,IRF4,STAT3,BACH2,FOXO1
chr1-198598674-198599536	chr1	198598674	198599536	5788	PTPRC	198589809	198770003	198638671	-39565	5788	PTPRC	+	Bcells	Exon	STAT1::STAT2,SPIC,PAX1,PAX9,POU2F1,POU3F1,POU3F2,POU3F3,POU5F1B,IKZF1,NHLH2,ASCL1,ETV7,MYF5,ZKSCAN5,EHF,ELF1,ELF3,GABPA,MYOD1,MYOG,POU2F3,SPIB,PAX2,POU2F2	STAT1::STAT2,ELF4,NHLH1,SPIC,POU5F1B,RARA::RXRG,SOX15,ETS2,IKZF1,NHLH2,ZKSCAN5,EHF,GABPA,SOX2,TWIST1,ETV5::DRGX,FOXO1::ELF1,FOXO1::FLI1	IKZF3,POU2F2,IKZF1,MTA2,FOXP1,STAT3,POU2AF1,IRF4,HDAC2,CTCF,SPI1
chr1-198622520-198623020	chr1	198622520	198623020	5788	PTPRC	198589809	198770003	198638671	-15900	5788	PTPRC	+	Bcells	Distal Intergenic	SPIC,ETV7,ZKSCAN5,EHF,ELF1,ELF3,GABPA,SNAI2,SPIB,POU1F1	SPIC,ZKSCAN5,EHF,GABPA,SNAI2,ETV5::DRGX	FOXP1,IRF4,STAT3,SPI1
chr1-204564647-204565249	chr1	204564647	204565249	4194	MDM4	204505552	204614071	204542789	22158	4194	MDM4	+	Bcells	Distal Intergenic	STAT1::STAT2,SPIC,POU2F1,POU3F1,POU3F2,POU3F3,POU3F4,POU5F1B,POU5F1,EBF1,POU2F3,SPIB,POU2F2,POU1F1	STAT1::STAT2,SPIC,POU5F1B,SOX15,ZNF449,CEBPA	BCOR,BCL6,NCOR2,STAT3,FOXP1,SPI1
chr1-244941050-244941550	chr1	244941050	244941550	84288	EFCAB2	244917124	245131082	244969705	-28404	84288	EFCAB2	+	Bcells	Distal Intergenic	NFKB2	NFKB2,ZNF140,ZSCAN29,ZNF416	BCOR,IRF4,BCL6,FOXP1,SPI1,STAT3,NCOR2,BACH2
chr2-12032349-12032849	chr2	12032349	12032849	100506457	MIR3681HG	11851436	12152857	12007174	25424	100506457	MIR3681HG	+	Bcells	Intron	STAT1::STAT2,POU2F1,POU3F1,POU5F1B,POU5F1,POU2F3,TCF4,POU1F1	STAT1::STAT2,POU5F1B,SOX15,MNX1	FOXO1,IKZF1,BCL6,FOXP1,IKZF3,BCOR,MTA2,NCOR2,CTCF,POU2AF1,HDAC2,SPI1,BACH2,STAT3,POU2F2,IRF4
chr2-25419537-25420037	chr2	25419537	25420037	1838	DTNB	25361252	25726978	25428016	8228	1838	DTNB	-	Bcells	Intron	SPIC,IKZF1,ETV7,EBF1,EHF,ELF1,ELF3,GABPA,MYOD1,SNAI2,SPIB,TCF4	ELF4,SPIC,IKZF1,EHF,GABPA,SNAI2	BCOR,BCL6,IRF4,NCOR2,FOXO1,FOXP1,BACH2,STAT3,SPI1
chr2-45728391-45728914	chr2	45728391	45728914	5581	PRKCE	45631756	46222384	45697972	30679	5581	PRKCE	+	Bcells	Intron	STAT1::STAT2,MSC,ASCL1,MYF5,MYOD1,MYOG,SPIB,TCF3	STAT1::STAT2,NHLH1,EVX1,HES2	BCL6,BCOR,FOXO1,STAT3,NCOR2,FOXP1,IRF4,SPI1,BACH2
chr2-47724146-47724823	chr2	47724146	47724823	2956	MSH6	47633380	47796683	47695819	28664	2956	MSH6	+	Bcells	Intron	SPIC,PAX1,PAX9,IKZF1,SNAI1,SNAI3,ETV7,TCF12,EBF1,EHF,ELF1,ELF3,GABPA,SPIB,TCF3,TCF4,PAX2	RELA,ELF4,SPIC,ESRRB,IKZF1,SNAI1,ZNF140,EHF,GABPA,LHX2,ETV5::DRGX,FOXO1::FLI1	CHD4,IKZF3,MTA2,BCL6,BCOR,IRF4,HDAC2,POU2F2,FOXO1,NCOR2,STAT3,FOXP1,KMT2B,BACH2,SPI1
chr2-60840753-60841513	chr2	60840753	60841513	400957	LINC01185	60836398	60881417	60881314	40180	400957	LINC01185	-	Bcells	Intron	MGA,TBX15,ZEB1,SNAI1,TCF12,TCF3,TCF4,TBX3	NFIA,RUNX2,EOMES,TBX5,SNAI1,ESRRA,TWIST1,ZNF416,TBX21,TBX3	BCOR,BCL6,NCOR2,FOXO1,FOXP1,STAT3,KMT2B,MTA2
chr2-65026993-65027574	chr2	65026993	65027574	6509	SLC1A4	64946808	65027907	64999448	27834	6509	SLC1A4	+	Bcells	Intron	FIGLA,SNAI3,EBF3,EBF1,MYOD1,SPIB	FIGLA	BCOR,FOXO1,STAT3,BCL6,FOXP1,IRF4,SPI1,NCOR2
chr2-68789515-68790015	chr2	68789515	68790015	9938	ARHGAP25	68662712	68844109	68774940	14824	9938	ARHGAP25	+	Bcells	Intron	ZEB1,SNAI1,SNAI3,ASCL1,TCF12,SNAI2,TCF3,TCF4	RELA,SNAI1,ZSCAN29,SNAI2,FOXO1::FLI1	IKZF1,BCOR,FOXO1,STAT3,MTA2,IRF4,BCL6,BACH2,NCOR2,POU2F2,SPI1,FOXP1,IKZF3,HDAC2,KMT2B
chr2-86238309-86238839	chr2	86238309	86238839	65055	REEP1	86227241	86389365	86255018	16443	65055	REEP1	-	Bcells	Intron	NFKB1,NFKB2,PAX1,PAX9,POU2F1,POU3F3,ASCL1,PAX2	RELA,NFKB2	BCOR,BCL6,STAT3
chr2-100142113-100142949	chr2	100142113	100142949	3899	AFF3	99534203	100175496	100142575	43	3899	AFF3	-	Bcells	Promoter	FIGLA,ZEB1,IKZF1,SNAI1,TCF12,EHF,ELF1,ELF3,GABPA,SPIB,TCF3,TCF4	FIGLA,IKZF1,SNAI1,ZNF136,EHF,GABPA,FOXO1::ELF1,FOXO1::FLI1	IRF4,BACH2,STAT3,CTCF,FOXP1,BCOR,BCL6,FOXO1,SPI1,NCOR2
chr2-100247454-100247954	chr2	100247454	100247954	150577	LINC01104	100175497	100276068	100242631	5072	150577	LINC01104	+	Bcells	Intron	STAT1::STAT2,MGA,TBX15,FIGLA,ZEB1,EBF3,EBF1,SNAI2,SPIB,TCF4,TBX3	STAT1::STAT2,RUNX2,TBX5,FIGLA,CEBPG,ZNF136,SNAI2,TBX3	FOXP1,BCOR,MTA2,CHD4,IKZF1,IKZF3,HDAC2,FOXO1,BCL6,IRF4,SPI1,NCOR2,STAT3,POU2F2,KMT2B,BACH2
chr2-100395130-100395630	chr2	100395130	100395630	9486	CHST10	100369290	100444069	100415845	20464	9486	CHST10	-	Bcells	Exon	NFKB2,ZKSCAN5,SPIB	RELA,JUND,NFKB2,TBX19,ZKSCAN5,CREB1	IRF4,SPI1,BCL6,BCOR,NCOR2,STAT3,FOXO1,FOXP1
chr2-105775877-105776865	chr2	105775877	105776865	8440	NCK2	105591706	105957514	105745731	30639	8440	NCK2	+	Bcells	Intron	STAT1::STAT2,PAX9,FIGLA,IKZF1,NHLH2,MYF5,ZKSCAN5,EBF1,EHF,ELF1,ELF3,GABPA,SPIB	JUND,STAT1::STAT2,ELF4,RUNX2,FIGLA,ETS2,IKZF1,NHLH2,ZNF136,HES2,ZKSCAN5,EHF,GABPA,ETV5::DRGX	IKZF1,IRF4,FOXP1,BCL6,BCOR,SPI1,MTA2,NCOR2,STAT3,FOXO1
chr2-151771428-151771998	chr2	151771428	151771998	4703	NEB	151478999	151781464	151734487	-37225	4703	NEB	-	Bcells	Distal Intergenic	MSC,NFKB2,POU2F1,POU3F1,POU5F1,MYF5,POU2F3,SPIB	NFKB2,SOX15,SOX2,FOXO1::FLI1	CHD4,IKZF3,IKZF1,IRF4,BCOR,MTA2,BCL6,POU2F2,BACH2,SPI1,FOXP1,HDAC2,STAT3,NCOR2,POU2AF1,FOXO1
chr2-230447673-230448511	chr2	230447673	230448511	6672	SP100	230408537	230619085	230449375	-1282	6672	SP100	+	Bcells	Intron	STAT1::STAT2,POU2F1,POU3F1,POU3F2,POU3F3,POU3F4,POU5F1B,ZEB1,ZKSCAN5,EHF,ELF1,ELF3,GABPA,SPIB,POU2F2,POU1F1	RELA,JUND,STAT1::STAT2,PHOX2A,POU5F1B,ZNF136,ZKSCAN5,EHF,GABPA,TWIST1,ETV5::DRGX,FOXO1::FLI1,DUXA	IRF4,BCL6,FOXO1,FOXP1,BCOR,SPI1,NCOR2,STAT3,BACH2
chr2-233099976-233101163	chr2	233099976	233101163	3635	INPP5D	233046320	233202744	233120602	-20032	3635	INPP5D	+	Bcells	Intron	STAT1::STAT2,NFKB2,MGA,TBX15,TFAP2A,ZEB1,IKZF1,SNAI1,SNAI3,ASCL1,TCF12,ZKSCAN5,EBF1,MYOD1,SPIB,TCF3,TCF4	STAT1::STAT2,NFIA,NHLH1,PHOX2A,NFKB2,TBX5,EVX1,ETS2,IKZF1,SNAI1,ZKSCAN5,ESRRA,FOXO1::ELF1,FOXO1::FLI1	BACH2,FOXP1,BCOR,BCL6,IRF4,FOXO1,STAT3,SPI1,MTA2,NCOR2,IKZF1,CHD4,IKZF3
chr2-233124678-233125178	chr2	233124678	233125178	3635	INPP5D	233046320	233202744	233122216	2711	3635	INPP5D	+	Bcells	Intron	SPIC,TFAP2A,ETV7,ZKSCAN5,EBF1,EHF,ELF1,ELF3,GABPA,SPIB	ELF4,SPIC,ZKSCAN5,EHF,GABPA,ZNF416	FOXP1,BCOR,BCL6,MTA2,IRF4,SPI1,STAT3,NCOR2,FOXO1,IKZF1
chr2-241041537-241042037	chr2	241041537	241042037	25992	SNED1	240947498	241082891	241040116	1670	25992	SNED1	+	Bcells	Intron	SPIC,IKZF1,NHLH2,ETV7,EHF,ELF1,ELF3,GABPA,SPIB	RELA,NHLH1,SPIC,SOX15,ETS2,IKZF1,NHLH2,EHF,GABPA	FOXO1,IRF4,BCL6,BCOR,SPI1,STAT3,FOXP1
chr3-4064966-4065562	chr3	4064966	4065562	6419	SETMAR	4052088	4385444	4303304	-238039	6419	SETMAR	+	Bcells	Intron	STAT1::STAT2,SPIC,POU2F1,POU5F1B,POU5F1,IKZF1,ETV7,ZKSCAN5,EHF,ELF1,ELF3,GABPA,POU2F3,SPIB,POU2F2	STAT1::STAT2,SPIC,POU5F1B,IKZF1,ZKSCAN5,EHF,GABPA	BCL6,FOXO1,BCOR,FOXP1,NCOR2,STAT3,KMT2B,IRF4,SPI1
chr3-4503038-4503589	chr3	4503038	4503589	3708	ITPR1	4493256	4737983	4493350	9962	3708	ITPR1	+	Bcells	Intron	STAT1::STAT2,IKZF1,EBF1,EHF,SPIB	STAT1::STAT2,EOMES,IKZF1,EHF,ETV5::DRGX	FOXO1,KMT2B,BCL6,FOXP1,BCOR,SPI1,STAT3,NCOR2,CTCF,IRF4
chr3-15050320-15050831	chr3	15050320	15050831	64432	MRPS25	15042311	15073447	15050102	-472	64432	MRPS25	-	Bcells	3' UTR	STAT1::STAT2,MSC,FIGLA,ZEB1,SNAI1,SNAI3,TCF12,MYOD1,SNAI2,SPIB,TCF3,TCF4	RORA,STAT1::STAT2,ESRRB,FIGLA,RARA::RXRG,SNAI1,ESRRA,SNAI2	SPI1,IRF4,STAT3,BCL6,BCOR
chr3-15345491-15346008	chr3	15345491	15346008	9467	SH3BP5	15261574	15378614	15341368	-4380	9467	SH3BP5	-	Bcells	Distal Intergenic	STAT1::STAT2,MSC,SPIC,TFAP2A,NHLH2,ASCL1,MYOG,SPIB	RORA,STAT1::STAT2,NHLH1,SPIC,ESRRB,NHLH2,ESRRA,MITF,FOXO1::FLI1	BACH2,BCL6,IRF4,BCOR,FOXO1,FOXP1,STAT3,SPI1,NCOR2
chr3-16433538-16434038	chr3	16433538	16434038	23180	RFTN1	16296167	16525173	16434770	981	23180	RFTN1	-	Bcells	Exon	POU2F1,POU3F3,POU5F1B,POU5F1,ZKSCAN5,MYOD1,POU2F3,SPIB,POU2F2	POU5F1B,ZKSCAN5,FOXO1::ELF1,FOXO1::FLI1,ZNF416	FOXO1,BCOR,FOXP1,KMT2B,MTA2,IRF4,BCL6,NCOR2,SPI1,IKZF1
chr3-25781089-25782632	chr3	25781089	25782632	55768	NGLY1	25697745	25782972	25782872	1011	55768	NGLY1	-	Bcells	Promoter	STAT1::STAT2,POU5F1B,MGA,TBX15,FIGLA,POU5F1,SNAI1,SNAI3,EBF3,POU2F3,SNAI2,SPIB,PAX2,TBX3	JUND,STAT1::STAT2,ESRRB,MEF2D,POU5F1B,EOMES,TBX5,FIGLA,DLX6,LHX5,SNAI1,LHX9,ESRRA,MITF,SNAI2,ZNF416,TBX21,TBX3	BCOR,BCL6,IRF4,BACH2,STAT3,SPI1,HDAC2
chr3-31952153-31952653	chr3	31952153	31952653	114884	OSBPL10	31646936	31981538	31960336	7932	114884	OSBPL10	-	Bcells	Intron	STAT1::STAT2,POU3F1,POU3F2,POU3F4,POU5F1B,TFAP2A,POU5F1,ETV7,ZKSCAN5,EHF,ELF1,ELF3,POU2F3,SPIB,PAX2,POU2F2	STAT1::STAT2,POU5F1B,ZKSCAN5,EHF,FOXO1::FLI1	FOXO1,FOXP1,BCL6,KMT2B,IRF4,BCOR,NCOR2,STAT3,SPI1
chr3-52225426-52226767	chr3	52225426	52226767	54106	TLR9	52218808	52231709	52226163	66	54106	TLR9	-	Bcells	Promoter	MSC,SPIC,POU2F1,POU3F4,POU5F1B,MGA,TBX15,TFAP2A,POU5F1,ZEB1,IKZF1,NHLH2,SNAI1,SNAI3,ASCL1,ETV7,EBF3,MYF5,TCF12,ZKSCAN5,EBF1,EHF,ELF1,ELF3,GABPA,MYOD1,MYOG,POU2F3,SNAI2,SPIB,TCF3,TCF4,POU2F2,POU1F1,TBX3	SPIC,POU5F1B,TBX5,IKZF1,NHLH2,SNAI1,ZKSCAN5,EHF,GABPA,SNAI2,TWIST1,ZNF416,TBX3	POU2F2,HDAC2,POU2AF1,FOXP1,CHD4,BCOR,BCL6,FOXO1,CTCF,IRF4,STAT3,SPI1,NCOR2
chr3-105854005-105854529	chr3	105854005	105854529	868	CBLB	105709632	106499517	105869043	14775	868	CBLB	-	Bcells	Intron	POU2F1,POU3F1,POU3F2,POU5F1B,MYF5,MYOD1,SNAI2,TCF4,POU2F2	LBX2,POU5F1B,TBX19,DLX6,EVX1,SOX15,LHX5,LHX9,ZNF449,MITF,SNAI2,CDX1	FOXO1,SPI1,FOXP1,BACH2,STAT3,IRF4,BCL6,BCOR,NCOR2,CTCF
chr3-106255740-106257148	chr3	106255740	106257148	868	CBLB	105709632	106499517	105869043	-387400	868	CBLB	-	Bcells	Distal Intergenic	STAT1::STAT2,MSC,NFKB1,NFKB2,TFAP2A,ZEB1,SNAI1,SNAI3,EBF3,EBF1,ELF1,ELF3,GABPA,MYOD1,SNAI2	STAT1::STAT2,MEF2D,NFKB2,LHX5,SNAI1,ZNF140,ZNF449,GABPA,HLF,SNAI2,FOXO1::ELF1,ZNF416,HOXA7	FOXO1,BCL6,BACH2,FOXP1,STAT3,SPI1,KMT2B,BCOR,NCOR2,IRF4
chr3-122077223-122078085	chr3	122077223	122078085	942	CD86	122038786	122137642	122077844	-189	942	CD86	+	Bcells	Promoter	STAT1::STAT2,NFKB1,NFKB2,ZEB1,SNAI1,EBF3,TCF12,EBF1,SPIB,TCF3,TCF4	RELA,STAT1::STAT2,NFKB2,SNAI1	SPI1,BCL6,IRF4,BCOR,STAT3,CTCF,FOXP1,FOXO1
chr3-129276354-129276854	chr3	129276354	129276854	56941	HMCES	129275841	129297198	129278828	-2223	56941	HMCES	+	Bcells	Intron	STAT1::STAT2,SPIC,NFKB2,POU2F1,POU3F1,POU3F2,POU3F4,POU5F1B,POU5F1,ZEB1,IKZF1,SNAI1,EBF3,TCF12,EBF1,EHF,ELF3,POU2F3,SNAI2,SPIB,TCF3,TCF4,POU2F2	STAT1::STAT2,SPIC,NFKB2,POU5F1B,RUNX2,IKZF1,NR2C1,SNAI1,ZNF449,EHF,SNAI2	IKZF1,FOXO1,FOXP1,IKZF3,BCL6,NCOR2,SPI1,MTA2,HDAC2,KMT2B,BACH2,BCOR,IRF4,POU2F2,STAT3,POU2AF1
chr3-179438747-179439298	chr3	179438747	179439298	59345	GNB4	179395431	179507235	179451145	12122	59345	GNB4	-	Bcells	Intron	POU3F1,POU3F2,POU3F3,POU3F4,POU5F1B,POU5F1,ZKSCAN5,ELF3,POU2F3,TCF4,POU2F2	POU5F1B,ZKSCAN5,ZNF449,ETV5::DRGX	IKZF1,BCL6,BCOR,STAT3,POU2F2,MTA2,SPI1,NCOR2
chr3-186532706-186533246	chr3	186532706	186533246	1427	CRYGS	186517091	186550588	186540520	7543	1427	CRYGS	-	Bcells	Distal Intergenic	STAT1::STAT2,MSC,SPIC,ASCL1,MYF5,ZKSCAN5,MYOD1,MYOG,SPIB	JUND,STAT1::STAT2,NHLH1,SPIC,SOX15,ZKSCAN5,CREB1	BCL6,IRF4,FOXP1,BCOR
chr3-187065193-187065693	chr3	187065193	187065693	6480	ST6GAL1	186886595	187105729	187071974	-6530	6480	ST6GAL1	+	Bcells	Intron	SPIC,NFKB1,POU2F1,POU3F1,POU3F2,POU3F4,POU5F1B,POU5F1,ZEB1,IKZF1,SNAI1,SNAI3,TCF12,POU2F3,TCF3,TCF4,POU2F2,POU1F1	SPIC,POU5F1B,TBX19,SOX15,IKZF1,SNAI1,SOX2,TWIST1,FOXO1::ELF1,FOXO1::FLI1	BCL6,NCOR2,BCOR,FOXP1,FOXO1,STAT3,IRF4
chr4-2696416-2696916	chr4	2696416	2696916	8603	FAM193A	2568870	2720568	2696274	391	8603	FAM193A	+	Bcells	3' UTR	STAT1::STAT2,SPIC,SPIB,TCF4	STAT1::STAT2,SPIC,MEF2D,ETV5::DRGX,FOXO1::FLI1	HDAC2,FOXP1,BCOR,IKZF1,BCL6,FOXO1,MTA2,STAT3,IRF4,NCOR2,CTCF,IKZF3
chr4-2832485-2832985	chr4	2832485	2832985	6452	SH3BP2	2774700	2836827	2829797	2937	6452	SH3BP2	+	Bcells	Exon	ZEB1,TCF12,TCF3,TCF4	NR2C1,ZNF449,CREB1	IKZF1,MTA2,IKZF3,BCOR,CTCF,BCL6,POU2F2,IRF4
chr4-15784797-15785297	chr4	15784797	15785297	952	CD38	15746802	15877668	15778312	6734	952	CD38	+	Bcells	Intron	STAT1::STAT2,SPIC,NFKB1,NFKB2,POU3F2,SNAI1,SNAI3,ETV7,ZKSCAN5,EHF,MYOD1,SNAI2,SPIB,TCF4,POU2F2,POU1F1	STAT1::STAT2,SPIC,MEF2D,NFKB2,SNAI1,ZKSCAN5,EHF,SNAI2	FOXO1,BCL6,FOXP1,STAT3,BCOR,IRF4,SPI1,NCOR2
chr4-39626175-39626740	chr4	39626175	39626740	201895	SMIM14	39556135	39668567	39638230	11772	201895	SMIM14	-	Bcells	Intron	IKZF1,ZKSCAN5,EBF1,GABPA,SPIB	MEF2D,EVX1,IKZF1,ZKSCAN5,GABPA,ZNF416	BACH2,IRF4,IKZF3,IKZF1,FOXP1,BCL6,BCOR,FOXO1,SPI1,NCOR2,STAT3
chr4-80875536-80876036	chr4	80875536	80876036	255119	C4orf22	80301993	80987886	80870049	5736	255119	C4orf22	+	Bcells	Intron	NHLH2,ASCL1,MYOG	NHLH1,NHLH2,NR2C1,ZNF136	IKZF3,IKZF1,MTA2,BCL6,POU2F2,FOXO1,NCOR2,BCOR,FOXP1,IRF4,STAT3,HDAC2,BACH2
chr4-85557175-85557798	chr4	85557175	85557798	83478	ARHGAP24	85220753	85663298	85570593	-13106	83478	ARHGAP24	+	Bcells	Intron	NFKB1,NFKB2,ZEB1,IKZF1,ZKSCAN5,EBF1,SPIB	RELA,NHLH1,NFKB2,IKZF1,ZKSCAN5,ZNF416	IRF4,FOXP1,BCL6,STAT3,FOXO1,SPI1,NCOR2,IKZF1,CTCF,BCOR
chr4-146059847-146060366	chr4	146059847	146060366	100505545	LINC01095	146025171	146148799	146111705	51598	100505545	LINC01095	-	Bcells	Distal Intergenic	STAT1::STAT2,SPIC,NFKB1,NFKB2,IKZF1,SNAI1,SNAI3,ASCL1,TCF12,EHF,ELF1,GABPA,SNAI2,TCF3,TCF4	RELA,JUND,STAT1::STAT2,SPIC,NFKB2,ETS2,IKZF1,NR1D1,SNAI1,CREB1,EHF,GABPA,SNAI2	FOXO1,IRF4,FOXP1,BCL6,KMT2B,IKZF1,BCOR,STAT3,MTA2,NCOR2,SPI1,BACH2,IKZF3
chr4-185213738-185214238	chr4	185213738	185214238	83891	SNX25	185209792	185365952	185210161	3826	83891	SNX25	+	Bcells	Intron	SPIC,POU3F1,POU3F4,POU5F1B,POU5F1,ETV7,ZKSCAN5,EHF,POU2F3,SPIB	SPIC,POU5F1B,RUNX2,NR1D1,ZKSCAN5,ZNF449,EHF,FOXO1::ELF1,FOXO1::FLI1	FOXO1,BCL6,IKZF1,IRF4,CTCF,BCOR,NCOR2,SPI1,STAT3,FOXP1,IKZF3
chr5-1484887-1485692	chr5	1484887	1485692	79888	LPCAT1	1456378	1502892	1494778	9488	79888	LPCAT1	-	Bcells	Intron	ZEB1,EBF3,EBF1	RELA,EOMES,RARA::RXRG,ZNF416	MTA2,IRF4,STAT3,IKZF1,BACH2,IKZF3
chr5-10578850-10579350	chr5	10578850	10579350	651746	ANKRD33B	10543208	10662784	10564468	14631	651746	ANKRD33B	+	Bcells	Intron	PAX9,IKZF1,NHLH2,SNAI1,SNAI3,ZKSCAN5,ELF1,ELF3,GABPA,MYOD1,SNAI2,SPIB,TCF4	IKZF1,NHLH2,SNAI1,ZKSCAN5,ZNF449,GABPA,SNAI2,ZNF416	FOXP1,BCL6,IKZF3,BCOR,FOXO1,SPI1,IKZF1,STAT3,IRF4
chr5-17282289-17283218	chr5	17282289	17283218	10409	BASP1	17217304	17302435	17217560	65192	10409	BASP1	+	Bcells	Distal Intergenic	STAT1::STAT2,SPIC,POU2F1,POU3F1,POU3F2,POU3F3,POU3F4,POU5F1B,POU5F1,IKZF1,ETV7,ZKSCAN5,EBF1,EHF,ELF1,ELF3,GABPA,POU2F3,SPIB,POU2F2,POU1F1	STAT1::STAT2,ELF4,SPIC,LBX2,POU5F1B,GMEB2,EVX1,SOX15,IKZF1,TGIF2LX,LHX9,ZKSCAN5,EHF,GABPA,LHX2,SOX2,ETV5::DRGX	FOXO1,BACH2,IKZF1,IKZF3,BCL6,MTA2,BCOR,NCOR2,IRF4,KMT2B,STAT3,POU2F2,FOXP1,POU2AF1,CTCF,HDAC2,SPI1
chr5-32290860-32291383	chr5	32290860	32291383	54545	MTMR12	32204122	32338973	32312924	21802	54545	MTMR12	-	Bcells	Intron	MSC,SPIC,NFKB1,NFKB2,ZEB1,IKZF1,SNAI1,SNAI3,ETV7,MYF5,TCF12,EHF,ELF1,ELF3,GABPA,MYOD1,MYOG,SNAI2,SPIB,TCF3,TCF4	RELA,SPIC,NFKB2,IKZF1,NR2C1,SNAI1,CREB1,EHF,GABPA,SNAI2,TWIST1,ZNF416	SPI1
chr5-40033226-40033854	chr5	40033226	40033854	102467077	LINC00603	39786906	40365894	40052291	-18750	102467077	LINC00603	+	Bcells	Intron	STAT1::STAT2,MSC,FIGLA,IKZF1,SNAI1,SNAI3,EBF3,MYOD1,SNAI2,TCF4	JUND,STAT1::STAT2,FIGLA,IKZF1,SNAI1,CREB1,SNAI2,FOXO1::ELF1,FOXO1::FLI1	FOXO1,BCL6,IKZF1,SPI1,STAT3,NCOR2,BCOR,MTA2
chr5-78221766-78222447	chr5	78221766	78222447	8546	AP3B1	77942327	78327669	78294692	72585	8546	AP3B1	-	Bcells	Exon	SPIC,POU5F1,IKZF1,ASCL1,ETV7,EBF3,EHF,ELF1,ELF3,GABPA,MYOG,SPIB	ELF4,SPIC,FOSL1::JUN,FOSL2::JUNB,FOSL2::JUND,IKZF1,CEBPA,EHF,ESRRA,GABPA,TWIST1,ETV5::DRGX,CDX1	BCL6,IRF4,MTA2,STAT3,BACH2,BCOR,CTCF,IKZF3,IKZF1
chr5-119016284-119016825	chr5	119016284	119016825	1657	DMXL1	119013159	119144431	119037772	-21217	1657	DMXL1	+	Bcells	Intron	STAT1::STAT2,SPIB	STAT1::STAT2,MEF2D	FOXO1,BCOR,BCL6,FOXP1,STAT3,IRF4,SPI1,NCOR2
chr5-122701817-122702319	chr5	122701817	122702319	101927379	LINC02201	122592079	122752840	122705069	3000	101927379	LINC02201	-	Bcells	Intron	NHLH2,ASCL1,MYF5,ZKSCAN5,MYOG	RELA,ELF4,NFIA,NHLH1,NHLH2,ZKSCAN5,HLF,SOX2	BCL6,IRF4,FOXP1,STAT3,NCOR2,BCOR,BACH2,FOXO1
chr5-122702410-122702910	chr5	122702410	122702910	101927379	LINC02201	122592079	122752840	122705069	2408	101927379	LINC02201	-	Bcells	Intron	EHF,ELF3,TBX3	EOMES,EHF,TBX21,CDX1,TBX3	IRF4,FOXP1,BCOR,SPI1
chr5-151255864-151256416	chr5	151255864	151256416	2760	GM2A	151238519	151279031	151252892	3247	2760	GM2A	+	Bcells	Intron	STAT1::STAT2,NFKB1,IKZF1,SPIB	RORA,STAT1::STAT2,ESRRB,IKZF1,NR2C1,ESRRA	BCOR,FOXP1,BCL6,IRF4,STAT3,SPI1
chr5-154238910-154239410	chr5	154238910	154239410	55568	GALNT10	154120167	154317288	154190997	48162	55568	GALNT10	+	Bcells	Intron	SPIC,TFAP2A,IKZF1,EBF3,ZKSCAN5,EBF1,SPIB	SPIC,MEF2D,IKZF1,ZKSCAN5	IKZF1,MTA2,SPI1,IKZF3,STAT3,BCL6,BCOR
chr5-157487286-157487935	chr5	157487286	157487935	8728	ADAM19	157481576	157614069	157502822	15211	8728	ADAM19	-	Bcells	Intron	MSC,NFKB1,MGA,TBX15,TFAP2A,FIGLA,ZEB1,NHLH2,SNAI1,ASCL1,EBF3,TCF12,ZKSCAN5,EBF1,ELF1,ELF3,MYOD1,SNAI2,TCF3,TCF4	FIGLA,NHLH2,SNAI1,ZKSCAN5,SNAI2	FOXP1,BCL6
chr5-158953950-158954450	chr5	158953950	158954450	1879	EBF1	158558892	159100122	159019129	64928	1879	EBF1	-	Bcells	Intron	STAT1::STAT2,POU5F1	STAT1::STAT2,NFIA,TBX19,NR1D1	IRF4,BACH2,FOXO1,BCOR,BCL6,SPI1,STAT3,NCOR2,FOXP1
chr5-159332711-159333245	chr5	159332711	159333245	3593	IL12B	159302715	159398581	159330887	-2090	3593	IL12B	-	Bcells	Exon	ETV7,EBF1,EHF,ELF1,ELF3,GABPA,SPIB	ZNF136,EHF,GABPA,SOX2	BCOR,BCL6,IRF4,NCOR2,STAT3,SPI1,FOXO1,FOXP1,BACH2
chr5-163914829-163915439	chr5	163914829	163915439	27430	MAT2B	163498587	163992309	163517217	397916	27430	MAT2B	+	Bcells	Distal Intergenic	MSC	MEF2D,SOX15	FOXP1,SPI1,FOXO1,MTA2,IKZF1,IKZF3,BCL6,BCOR
chr5-179544433-179544938	chr5	179544433	179544938	80230	RUFY1	179447995	179611776	179550558	-5872	80230	RUFY1	+	Bcells	Distal Intergenic	MSC,NFKB2,FIGLA,SNAI1,SNAI3,ETV7,EBF3,ZKSCAN5,EHF,ELF1,ELF3,GABPA,MYOD1,SNAI2,SPIB,TCF4	LBX2,NFKB2,FIGLA,DLX6,SNAI1,LHX9,ZKSCAN5,EHF,GABPA,SNAI2	STAT3,MTA2,FOXP1,BCL6,IKZF1,BCOR,IRF4,SPI1,FOXO1
chr6-14095162-14095871	chr6	14095162	14095871	9308	CD83	14021225	14201393	14117256	-21739	9308	CD83	+	Bcells	Distal Intergenic	MSC,NFKB1,NFKB2,ZEB1,IKZF1,SNAI1,SNAI3,ASCL1,MYF5,TCF12,MYOD1,MYOG,SPIB,TCF3,TCF4	RELA,SPDEF,NFKB2,IKZF1,SNAI1	BACH2,BCOR,STAT3,MTA2,FOXO1,FOXP1,BCL6,SPI1,IKZF1,NCOR2,CTCF
chr6-42025381-42026232	chr6	42025381	42026232	896	CCND3	41932851	42050435	42048676	22869	896	CCND3	-	Bcells	Intron	STAT1::STAT2,TFAP2A,IKZF1,EBF3,ZKSCAN5,EBF1,SPIB	RELA,STAT1::STAT2,ESRRB,RUNX2,FOSL1::JUN,FOSL2::JUND,IKZF1,NR1D1,ZKSCAN5	FOXP1,IKZF3,MTA2,IRF4,IKZF1,BCL6,BCOR,SPI1,FOXO1,HDAC2,STAT3,NCOR2,BACH2
chr6-110205771-110206306	chr6	110205771	110206306	51362	CDC40	110180073	110279791	110201605	4432	51362	CDC40	+	Bcells	Intron	STAT1::STAT2,POU2F1,POU3F1,POU3F2,POU3F3,POU3F4,POU5F1B,FIGLA,POU5F1,POU2F3,POU2F2,POU1F1,TBX3	STAT1::STAT2,POU5F1B,FIGLA,ZNF140,FOXO1::FLI1,TBX21,TBX3	BCL6,STAT3,BCOR,FOXO1,BACH2,SPI1,NCOR2,FOXP1
chr6-131108014-131108514	chr6	131108014	131108514	9465	AKAP7	131099495	131411787	131135666	-27401	9465	AKAP7	+	Bcells	Distal Intergenic	SPIC,POU5F1,IKZF1,POU2F3	SPIC,PHOX2A,FOSL1::JUN,FOSL2::JUNB,FOSL2::JUND,IKZF1,ZNF449,LHX2	SPI1
chr6-137430967-137431467	chr6	137430967	137431467	167826	OLIG3	137356850	137616616	137494250	63032	167826	OLIG3	-	Bcells	Distal Intergenic	STAT1::STAT2,SPIC,PAX1,PAX9,POU2F1,POU3F4,POU5F1B,POU5F1,POU2F3	STAT1::STAT2,SPIC,POU5F1B,ETV5::DRGX	HDAC2,FOXP1,POU2F2,POU2AF1,BCOR,MTA2,FOXO1,IKZF3,BCL6,NCOR2,SPI1
chr6-148520033-148520533	chr6	148520033	148520533	23328	SASH1	147890766	148635870	148524413	-4129	23328	SASH1	+	Bcells	Exon	SPIC,PAX1,PAX9,FIGLA,IKZF1,ASCL1,ETV7,EHF,ELF1,ELF3,GABPA,MYOD1,MYOG,SPIB,PAX2	ELF4,NHLH1,SPIC,FIGLA,FOSL1::JUN,FOSL2::JUNB,FOSL2::JUND,RARA::RXRG,IKZF1,CREB1,EHF,GABPA,FOXO1::FLI1	STAT3,BCOR,BCL6,MTA2,FOXP1,SPI1,IKZF3,IKZF1,BACH2,NCOR2,IRF4
chr6-149468081-149468603	chr6	149468081	149468603	340152	ZC3H12D	149428549	149501462	149456869	-11472	340152	ZC3H12D	-	Bcells	Intron	SPIC,NFKB1,IKZF1,ETV7,EBF1,EHF,ELF1,ELF3,GABPA,SPIB	ELF4,NFIA,SPIC,MEF2D,IKZF1,EHF,GABPA,FOXO1::FLI1	FOXP1,SPI1,BCL6,BCOR,IRF4,STAT3
chr6-149468789-149469289	chr6	149468789	149469289	340152	ZC3H12D	149428549	149501462	149456869	-12169	340152	ZC3H12D	-	Bcells	Intron	NFKB1,NFKB2,ZKSCAN5,EHF,SPIB	NFKB2,ZKSCAN5,EHF,CDX1	BCOR,FOXP1,FOXO1,IRF4,BCL6,SPI1,STAT3,NCOR2
chr6-150622846-150623899	chr6	150622846	150623899	57480	PLEKHG1	150484921	150817117	150599883	23488	57480	PLEKHG1	+	Bcells	Intron	STAT1::STAT2,SPIC,ZEB1,IKZF1,NHLH2,SNAI1,SNAI3,ETV7,TCF12,ZKSCAN5,EHF,ELF1,ELF3,GABPA,MYOD1,SNAI2,SPIB,TCF3,TCF4	RORA,STAT1::STAT2,NHLH1,SPIC,ESRRB,SOX15,IKZF1,NHLH2,SNAI1,ZKSCAN5,EHF,GABPA,SNAI2	BCOR,FOXP1,IRF4,SPI1,FOXO1,NCOR2,STAT3,BCL6,KMT2B,BACH2
chr6-159094372-159094905	chr6	159094372	159094905	117289	TAGAP	159022603	159107274	159045152	-49485	117289	TAGAP	-	Bcells	Exon	NHLH2,SNAI3,EBF1,SNAI2	NHLH1,MEF2D,NHLH2,SNAI2,TWIST1	BCOR,FOXP1,SPI1,NCOR2,BCL6,MTA2,CTCF,FOXO1,IKZF1,IKZF3,STAT3,KMT2B,POU2F2
chr6-167112870-167113791	chr6	167112870	167113791	1235	CCR6	167068299	167136125	167111807	1522	1235	CCR6	+	Bcells	Intron	SPIC,POU3F3,POU5F1,ZEB1,IKZF1,ETV7,EBF3,TCF12,ZKSCAN5,EBF1,EHF,ELF1,ELF3,GABPA,POU2F3,SPIB,TCF3,TCF4	ELF4,SPIC,LBX2,DLX6,IKZF1,LHX5,LHX9,ZKSCAN5,EHF,GABPA	BCL6,FOXP1,FOXO1,NCOR2,MTA2,IRF4,IKZF1,SPI1,KMT2B,IKZF3,STAT3,HDAC2
chr7-1024191-1024697	chr7	1024191	1024697	442907	MIR339	1004852	1025692	1023045	-1398	442907	MIR339	-	Bcells	Exon	STAT1::STAT2,TFAP2A,ZEB1,EBF3,TCF12,EBF1,TCF4	STAT1::STAT2,FOXO1::ELF1	IKZF1,MTA2,IKZF3,FOXP1,HDAC2,BCL6,FOXO1,POU2F2,NCOR2,POU2AF1,STAT3,KMT2B,BACH2
chr7-18566681-18567181	chr7	18566681	18567181	9734	HDAC9	18208866	18984162	18509313	57617	9734	HDAC9	+	Bcells	Intron	POU2F1,POU5F1B,POU5F1,ZEB1,IKZF1,NHLH2,SNAI1,SNAI3,TCF12,ZKSCAN5,POU2F3,TCF3,TCF4	POU5F1B,IKZF1,NHLH2,NR1D1,SNAI1,ZKSCAN5,ZNF449,TWIST1	BCL6,NCOR2,SPI1,FOXO1,BCOR,STAT3,FOXP1,BACH2,IRF4
chr7-21966221-21966721	chr7	21966221	21966721	55536	CDCA7L	21898443	22041078	21946084	-20386	55536	CDCA7L	-	Bcells	Distal Intergenic	STAT1::STAT2,SPIC,PAX1,POU2F1,POU3F2,POU5F1B,POU5F1,IKZF1,ZKSCAN5,EHF,ELF1,ELF3,GABPA,POU2F3,SPIB	STAT1::STAT2,SPIC,POU5F1B,IKZF1,ZKSCAN5,EHF,GABPA,FOXO1::FLI1	FOXO1,BCL6,IRF4,NCOR2,FOXP1,STAT3,SPI1,BCOR
chr7-47670613-47671244	chr7	47670613	47671244	401335	C7orf65	47638592	47708360	47655244	15683	401335	C7orf65	+	Bcells	Distal Intergenic	STAT1::STAT2,POU2F1,POU3F1,POU3F2,POU3F3,POU3F4,POU5F1B,POU5F1,ZEB1,NHLH2,SNAI1,ETV7,MYF5,TCF12,EHF,ELF1,ELF3,GABPA,POU2F3,SPIB,TCF3,TCF4,POU2F2,POU1F1	RORA,RELA,STAT1::STAT2,ESRRB,POU5F1B,TBX5,NHLH2,SNAI1,EHF,ESRRA,GABPA,TWIST1	FOXP1,FOXO1,POU2AF1,BCOR,BACH2,NCOR2,BCL6,STAT3,SPI1,IRF4
chr7-74100910-74101660	chr7	74100910	74101660	3984	LIMK1	74067893	74144806	74097103	4181	3984	LIMK1	+	Bcells	Intron	MSC,ZEB1,NHLH2,SNAI1,ASCL1,EBF3,MYF5,TCF12,EBF1,MYOD1,MYOG,SNAI2,TCF3,TCF4	RELA,JUND,NHLH1,MEF2D,NHLH2,NR1D1,SNAI1,ZNF449,CREB1,SNAI2,TWIST1	IKZF3,BCOR,IKZF1,POU2AF1,MTA2,FOXP1,FOXO1,BCL6,NCOR2,HDAC2,POU2F2,SPI1
chr7-121180389-121180889	chr7	121180389	121180889	79974	CPED1	120978087	121237461	121149556	31082	79974	CPED1	+	Bcells	Intron	STAT1::STAT2,MGA,TBX15,IKZF1,ZKSCAN5,EHF,ELF1,ELF3,GABPA,SPIB,TBX3	STAT1::STAT2,PHOX2A,MEF2D,EOMES,TBX5,IKZF1,ZKSCAN5,EHF,GABPA,SOX2,TBX21,TBX3	IRF4,STAT3,SPI1,BCL6,IKZF1,FOXO1,BCOR,FOXP1
chr7-129146326-129146965	chr7	129146326	129146965	340348	TSPAN33	129100033	129177656	129144892	1752	340348	TSPAN33	+	Bcells	Intron	STAT1::STAT2,MSC,FIGLA,MYF5,ZKSCAN5,EHF,ELF1,GABPA,MYOG,SPIB	STAT1::STAT2,FIGLA,NR2C1,ZKSCAN5,EHF,GABPA	BCOR,BCL6,STAT3,FOXP1,SPI1
chr7-140222748-140223248	chr7	140222748	140223248	80853	KDM7A	140077932	140257430	140177035	-45962	80853	KDM7A	-	Bcells	Distal Intergenic	SPIC,PAX1,PAX9,IKZF1,ASCL1,ZKSCAN5,EHF,ELF1,ELF3,GABPA,TBX3	SPIC,IKZF1,ZSCAN29,ZKSCAN5,EHF,GABPA,FOXO1::FLI1,TBX21,TBX3	FOXP1,BCL6,BCOR,SPI1
chr7-152158696-152159216	chr7	152158696	152159216	58508	KMT2C	152134126	152449895	152162164	3207	58508	KMT2C	-	Bcells	3' UTR	STAT1::STAT2,POU2F1,POU3F1,POU3F2,POU3F3,POU3F4,POU5F1B,TFAP2A,POU5F1,ZEB1,IKZF1,SNAI1,SNAI3,ETV7,TCF12,ZKSCAN5,EHF,ELF1,ELF3,GABPA,MYOD1,POU2F3,SPIB,TCF3,TCF4,POU2F2,POU1F1	STAT1::STAT2,POU5F1B,TBX19,FOSL1::JUN,FOSL2::JUNB,FOSL2::JUND,IKZF1,SNAI1,ZKSCAN5,EHF,GABPA,LHX2	BCOR,IRF4,BCL6,NCOR2,FOXO1,SPI1,STAT3,FOXP1
chr8-8744496-8745003	chr8	8744496	8745003	137075	CLDN23	8544219	8761901	8701938	42810	137075	CLDN23	+	Bcells	Intron	MSC,SPIC,FIGLA,IKZF1,SNAI1,SNAI3,ETV7,ZKSCAN5,EHF,ELF1,ELF3,GABPA,MYOD1,SNAI2,SPIB	JUND,SPIC,FIGLA,IKZF1,SNAI1,HOXC9,ZKSCAN5,EHF,GABPA,LHX2,SNAI2	FOXO1,BCL6,IRF4,KMT2B,NCOR2,BCOR,SPI1,FOXP1,STAT3
chr8-11491819-11492465	chr8	11491819	11492465	640	BLK	11484359	11568323	11494001	-1858	640	BLK	+	Bcells	Intron	STAT1::STAT2,MSC,POU2F1,POU3F1,POU3F2,POU3F3,POU3F4,POU5F1B,POU5F1,ZKSCAN5,EHF,ELF1,ELF3,POU2F3,SPIB	STAT1::STAT2,POU5F1B,ZNF140,ZKSCAN5,EHF,HLF,TWIST1,CDX1	POU2AF1,MTA2,FOXP1,FOXO1,POU2F2,IKZF3,HDAC2,NCOR2,BCL6,IKZF1,KMT2B,BACH2,STAT3,IRF4,SPI1,CHD4
chr8-11545661-11546161	chr8	11545661	11546161	640	BLK	11484359	11568323	11545731	179	640	BLK	+	Bcells	Promoter	MSC,NFKB1,NFKB2,TFAP2A,FIGLA,ASCL1,MYF5,ZKSCAN5,EBF1,MYOD1,MYOG	RELA,NHLH1,NFKB2,FIGLA,ZKSCAN5,ZNF449	FOXO1,IKZF1,IKZF3,MTA2,FOXP1,BCL6,BCOR,IRF4,POU2F2,CHD4,HDAC2,NCOR2,BACH2,KMT2B,POU2AF1,STAT3,CTCF
chr8-22700855-22701394	chr8	22700855	22701394	1960	EGR3	22680687	22810605	22693302	-7821	1960	EGR3	-	Bcells	Exon	STAT1::STAT2,MGA,TBX15,IKZF1,EBF3,MYF5,ZKSCAN5,EBF1,SPIB,TBX3	STAT1::STAT2,EOMES,TBX5,IKZF1,ZKSCAN5,ZNF449,TBX21,TBX3	BCOR,NCOR2,BCL6,FOXP1,STAT3,IRF4
chr8-47198040-47198986	chr8	47198040	47198986	23514	SPIDR	47050736	47260954	47260575	-62061	23514	SPIDR	+	Bcells	Promoter	NFKB2,ZEB1,IKZF1,NHLH2,ASCL1,EBF3,TCF12,EBF1,GABPA,MYOD1,MYOG,TCF3	NFKB2,ETS2,IKZF1,NHLH2,ZNF449,GABPA,ETV5::DRGX	BACH2,BCOR,IKZF1,MTA2,NCOR2,IKZF3,FOXP1,BCL6,CHD4,POU2AF1,POU2F2,FOXO1,STAT3,SPI1,CTCF
chr8-52294144-52295365	chr8	52294144	52295365	9705	ST18	52016166	52513183	52254348	-40405	9705	ST18	-	Bcells	Exon	SPIC,NFKB1,POU2F1,POU3F1,POU3F2,POU3F3,POU3F4,POU5F1B,FIGLA,POU5F1,IKZF1,ETV7,ZKSCAN5,EHF,ELF1,ELF3,GABPA,MYOD1,POU2F3,SNAI2,SPIB,POU2F2,POU1F1,TBX3	ELF4,SPIC,POU5F1B,EOMES,TBX19,FIGLA,ETS2,IKZF1,ZNF140,ZKSCAN5,EHF,ESRRA,GABPA,SNAI2,ETV5::DRGX,FOXO1::ELF1,ZNF416,TBX21,TBX3	BCOR,FOXO1,FOXP1,BCL6,SPI1,STAT3,KMT2B,NCOR2,BACH2,IKZF1
chr8-55840498-55840998	chr8	55840498	55840998	4067	LYN	55834956	56014726	55879813	-39064	4067	LYN	+	Bcells	Distal Intergenic	ZEB1,SNAI1,TCF12,TCF3,TCF4	SNAI1,TGIF2LX	BCOR,IRF4,BCL6,FOXP1,SPI1,FOXO1,STAT3,BACH2
chr8-95165401-95165901	chr8	95165401	95165901	79666	PLEKHF2	95103494	95169266	95134076	31574	79666	PLEKHF2	+	Bcells	Distal Intergenic	NHLH2,ELF1,GABPA	ELF4,NHLH2,GABPA	BCL6,IKZF1,FOXP1,SPI1,STAT3,BCOR,FOXO1
chr8-124612138-124612638	chr8	124612138	124612638	9788	MTSS1	124551626	124775243	124619479	7090	9788	MTSS1	-	Bcells	Intron	STAT1::STAT2,POU3F4,POU5F1B,POU5F1,NHLH2,POU2F3	STAT1::STAT2,POU5F1B,NHLH2,TWIST1,FOXO1::FLI1
chr8-127302661-127303208	chr8	127302661	127303208	103021164	CASC21	127279182	127369836	127339274	-36339	103021164	CASC21	+	Bcells	Intron	SPIC,IKZF1,SPIB	SPIC,IKZF1,ZNF416
chr8-128191073-128191573	chr8	128191073	128191573	100302281	MIR1208	128123318	128282748	128150116	41206	100302281	MIR1208	+	Bcells	Distal Intergenic	STAT1::STAT2,NHLH2,EBF1	STAT1::STAT2,SOX15,NHLH2,NR2C1,HOXC9,ETV5::DRGX,CDX1
chr8-128267123-128268130	chr8	128267123	128268130	100302281	MIR1208	128123318	128282748	128150116	117509	100302281	MIR1208	+	Bcells	Distal Intergenic	SPIC,POU2F1,POU3F1,POU3F2,POU3F3,POU3F4,POU5F1B,POU5F1,ZEB1,IKZF1,ETV7,TCF12,ZKSCAN5,ELF3,POU2F3,SPIB,TCF3,TCF4,POU2F2,POU1F1	SPIC,POU5F1B,ELK1,ETS2,IKZF1,ZKSCAN5,ESRRA,HLF
chr9-22196963-22197478	chr9	22196963	22197478	1030	CDKN2B	22002287	22228102	22009363	-187856	1030	CDKN2B	-	Bcells	Distal Intergenic	STAT1::STAT2,NFKB1,NFKB2,ZEB1,IKZF1,GABPA,SPIB,TCF4	RELA,STAT1::STAT2,PHOX2A,NFKB2,SOX15,IKZF1,ESRRA,GABPA,ETV5::DRGX,FOXO1::ELF1
chr9-27377602-27378344	chr9	27377602	27378344	79817	MOB3B	27359427	27473014	27421714	43740	79817	MOB3B	-	Bcells	Intron	STAT1::STAT2,POU2F1,POU3F1,POU3F2,POU3F3,POU5F1,ZEB1,EBF1,SPIB,POU2F2,POU1F1	RORA,JUND,STAT1::STAT2,NR2C1,ZNF449,CREB1
chr9-35719108-35719655	chr9	35719108	35719655	102465513	MIR6852	35709355	35721422	35710741	-8639	102465513	MIR6852	-	Bcells	Exon	MSC,MGA,TBX15,IKZF1,EBF3,MYF5	ELF4,SPDEF,ETS2,IKZF1
chr9-36993912-36994877	chr9	36993912	36994877	5079	PAX5	36930061	37057021	37002675	8280	5079	PAX5	-	Bcells	Intron	STAT1::STAT2,SPIC,TFAP2A,ZEB1,IKZF1,NHLH2,ASCL1,EBF3,EBF1,EHF,SPIB,TCF4	STAT1::STAT2,SPIC,RARA::RXRG,IKZF1,NHLH2,CEBPA,EHF,FOXO1::ELF1,FOXO1::FLI1
chr9-68640386-68640886	chr9	68640386	68640886	8395	PIP5K1B	68626002	68761155	68705414	-64777	8395	PIP5K1B	+	Bcells	Intron	ZEB1,SNAI1,TCF12,ELF1,GABPA,TCF3,TCF4,TBX3	MEF2D,TBX5,SNAI1,TGIF2LX,GABPA,TBX3
chr9-76472019-76472655	chr9	76472019	76472655	2650	GCNT1	76407184	76537196	76459230	13106	2650	GCNT1	+	Bcells	Intron	PAX1,TFAP2A,ZEB1,IKZF1,ZKSCAN5,EHF,ELF1,ELF3,GABPA,SPIB,PAX2	RORA,IKZF1,TGIF2LX,ZKSCAN5,EHF,GABPA
chr9-80134433-80134933	chr9	80134433	80134933	101927477	LINC01507	79841809	80822050	80030579	104103	101927477	LINC01507	+	Bcells	Distal Intergenic	SPIC,ZEB1,SNAI1,TCF12,EHF,ELF1,ELF3,GABPA,SPIB,TCF3,TCF4	RELA,ELF4,SPIC,PHOX2A,SNAI1,EHF,GABPA,FOXO1::FLI1
chr9-107260311-107260947	chr9	107260311	107260947	5887	RAD23B	107146164	107367472	107283137	-22507	5887	RAD23B	+	Bcells	Distal Intergenic	ETV7,ZKSCAN5,SPIB	RUNX2,TBX19,SOX15,ZKSCAN5
chr9-125446717-125447217	chr9	125446717	125447217	79109	MAPKAP1	125402900	125727289	125451101	4133	79109	MAPKAP1	-	Bcells	Intron	FIGLA,ZEB1,EBF3,TCF12,EBF1,TCF3,TCF4	FIGLA,SOX15,ZNF136,MITF
chr10-5840972-5841472	chr10	5840972	5841472	2665	GDI2	5727114	5865051	5842132	909	2665	GDI2	-	Bcells	Promoter	MSC,MGA,TBX15,FIGLA,ZEB1,SNAI1,SNAI3,TCF12,TCF3,TCF4,TBX3	EOMES,TBX5,FIGLA,RARA::RXRG,NR1D1,SNAI1,ZNF449,MITF,SOX2,TBX21,TBX3	IKZF3,MTA2,BCOR,FOXO1,STAT3,NCOR2,BCL6,HDAC2,SPI1,FOXP1,IRF4
chr10-12075029-12075529	chr10	12075029	12075529	55526	DHTKD1	12056072	12124208	12081524	-6244	55526	DHTKD1	+	Bcells	Intron	STAT1::STAT2,NHLH2,SNAI1,ASCL1,TCF12,SNAI2,TCF3,TCF4	STAT1::STAT2,MEF2D,NHLH2,SNAI1,ESRRA,SNAI2	STAT3,BCL6,IKZF1,FOXP1
chr10-48574135-48574748	chr10	48574135	48574748	58504	ARHGAP22	48440761	48670570	48583047	8605	58504	ARHGAP22	-	Bcells	Exon	MGA,TBX15,FIGLA,ETV7,EHF,ELF1,ELF3,SPIB,TBX3	MEF2D,EOMES,TBX5,FIGLA,ZNF449,EHF,LHX2,TBX21,TBX3	FOXO1,IRF4,SPI1,BCL6,NCOR2,STAT3,FOXP1,BCOR,CTCF
chr10-48667935-48668720	chr10	48667935	48668720	58504	ARHGAP22	48440761	48670570	48656265	-12061	58504	ARHGAP22	-	Bcells	Intron	MSC,ASCL1,ETV7,EBF3,ZKSCAN5,EHF,ELF3,MYOG,SPIB	NHLH1,MEF2D,ELK1,ZKSCAN5,CREB1,EHF	BCOR,FOXO1,IRF4,BCL6,FOXP1,MTA2,NCOR2,SPI1,CTCF,STAT3,IKZF1,IKZF3
chr10-48671438-48671938	chr10	48671438	48671938	57705	WDFY4	48670571	48867662	48684876	-13187	57705	WDFY4	+	Bcells	Intron	NFKB2,TFAP2A,ZEB1,IKZF1,SNAI1,ETV7,TCF12,ZKSCAN5,EBF1,TCF3,TCF4,TBX3	NFKB2,IKZF1,SNAI1,ZKSCAN5,ZNF449,TBX21,TBX3	IKZF1,BCOR,IKZF3,BCL6,FOXP1,IRF4,NCOR2,FOXO1,STAT3,MTA2
chr10-62000133-62000709	chr10	62000133	62000709	84159	ARID5B	61782149	62142737	62049211	-48789	84159	ARID5B	+	Bcells	Exon	POU5F1B,TFAP2A,IKZF1	ESRRB,POU5F1B,ETS2,IKZF1,SOX2	BCOR,BCL6,IRF4,FOXO1,STAT3,SPI1,NCOR2,FOXP1
chr10-62080082-62080582	chr10	62080082	62080582	84159	ARID5B	61782149	62142737	62049211	31120	84159	ARID5B	+	Bcells	Intron	POU3F2,POU3F4,POU5F1B,NHLH2,ZKSCAN5,MYOD1,SNAI2,PAX2,POU2F2,POU1F1,TBX3	POU5F1B,EOMES,NHLH2,ZKSCAN5,ESRRA,SNAI2,TBX21,CDX1,TBX3	BCOR,BACH2,CTCF,FOXP1,NCOR2,BCL6,FOXO1,SPI1,STAT3
chr10-62527031-62527675	chr10	62527031	62527675	22891	ZNF365	62321450	62724364	62520448	6904	22891	ZNF365	+	Bcells	Intron	MSC,FIGLA,SNAI1,SNAI3,ASCL1,EBF3,EBF1,MYOD1,MYOG,SNAI2,TCF4	NHLH1,FIGLA,RARA::RXRG,SNAI1,ZNF449,SNAI2	MTA2,IKZF3,IKZF1,HDAC2,FOXP1
chr10-92742140-92742647	chr10	92742140	92742647	3087	HHEX	92641619	92763372	92692032	50360	3087	HHEX	+	Bcells	Distal Intergenic	STAT1::STAT2,SPIC,TFAP2A,ZKSCAN5,SPIB	STAT1::STAT2,SPIC,ZKSCAN5,MNX1	IRF4,BCOR,BCL6,FOXO1,SPI1,NCOR2,FOXP1,STAT3,BACH2
chr10-96700580-96701123	chr10	96700580	96701123	118788	PIK3AP1	96603121	96774639	96700878	26	118788	PIK3AP1	-	Bcells	Promoter	STAT1::STAT2,SPIC,PAX1,PAX9,TFAP2A,EBF3,EBF1	STAT1::STAT2,SPIC,ETV5::DRGX	MTA2,IKZF3,STAT3,BCOR,BCL6,FOXP1,FOXO1,IRF4,SPI1,HDAC2,NCOR2
chr10-100014259-100014759	chr10	100014259	100014759	23268	DNMBP	99968565	100037656	100009919	-4589	23268	DNMBP	-	Bcells	Distal Intergenic	SPIC,ZEB1,SNAI1,SNAI3,TCF12,ZKSCAN5,MYOD1,SNAI2,TCF3,TCF4,PAX2	SPIC,SNAI1,ZKSCAN5,SNAI2	BCL6,FOXO1,MTA2,STAT3,BCOR,FOXP1,HDAC2,NCOR2,CHD4
chr10-124601384-124602393	chr10	124601384	124602393	64077	LHPP	124456010	124658229	124605200	-3311	64077	LHPP	+	Bcells	Intron	PAX9,EBF3,MYF5,ZKSCAN5,TCF3	RORA,GMEB2,NR1D1,HES2,ZKSCAN5,ESRRA,FOXO1::FLI1,ZNF416	IKZF1,STAT3,IKZF3,BCOR,BCL6,FOXP1,NCOR2,MTA2,POU2AF1,POU2F2,FOXO1,KMT2B,CHD4,SPI1
chr10-133388835-133389849	chr10	133388835	133389849	92170	MTG1	133385187	133390946	133390834	-1491	92170	MTG1	+	Bcells	3' UTR	SPIC,PAX9,EHF,ELF1,ELF3,GABPA,SPIB	RELA,SPIC,RARA::RXRG,ZNF136,EHF,GABPA,FOXO1::FLI1,ZNF416	BCL6,FOXP1,NCOR2,IKZF1,MTA2,BCOR,FOXO1,IRF4,BACH2,STAT3,IKZF3,SPI1,CTCF
chr11-3893932-3894696	chr11	3893932	3894696	6786	STIM1	3856123	4090456	3888087	6226	6786	STIM1	+	Bcells	Intron	SPIC,MGA,TBX15,ETV7,EBF3,EBF1,EHF,ELF1,ELF3,GABPA,SPIB,TBX3	ELF4,SPIC,ESRRB,TBX5,SOX15,ZNF140,EHF,ESRRA,GABPA,SOX2,ETV5::DRGX,TBX3	BCOR,MTA2,FOXO1,FOXP1,IKZF1,CHD4,SPI1,IRF4,BCL6,STAT3,HDAC2,NCOR2,IKZF3,POU2AF1,POU2F2
chr11-44609093-44610229	chr11	44609093	44610229	3732	CD82	44437297	44672367	44604428	5232	3732	CD82	+	Bcells	Intron	SPIC,MGA,TBX15,IKZF1,ETV7,EBF3,ZKSCAN5,EBF1,EHF,ELF1,ELF3,GABPA,MYOD1,SPIB,TBX3	ELF4,SPIC,EOMES,TBX5,EVX1,IKZF1,NR2C1,ZKSCAN5,ZNF449,EHF,GABPA,FOXO1::ELF1,FOXO1::FLI1,TBX21,TBX3	BCOR,IKZF3,MTA2,FOXP1,BCL6,CHD4,FOXO1,IRF4,STAT3,HDAC2,POU2F2,SPI1
chr11-59095173-59095673	chr11	59095173	59095673	374393	FAM111B	59027137	59124824	59107185	-11761	374393	FAM111B	+	Bcells	Distal Intergenic	PAX1,PAX9,POU3F1,POU3F2,ETV7,ZKSCAN5,EHF,ELF1,ELF3,GABPA,SPIB,PAX2,POU2F2,POU1F1	ESRRB,RARA::RXRG,HES2,ZKSCAN5,EHF,ESRRA,GABPA,TWIST1	SPI1
chr11-60455402-60456059	chr11	60455402	60456059	931	MS4A1	60442765	60479687	60455752	-21	931	MS4A1	+	Bcells	Promoter	STAT1::STAT2,ZEB1,IKZF1,SNAI1,SNAI3,EBF3,TCF12,ZKSCAN5,EBF1,GABPA,TCF3,TCF4	STAT1::STAT2,NHLH1,DLX6,IKZF1,LHX5,SNAI1,LHX9,ZKSCAN5,GABPA	BCOR,FOXO1,BCL6,NCOR2,FOXP1,KMT2B,IRF4,BACH2,STAT3,SPI1,CTCF
chr11-64851138-64851698	chr11	64851138	64851698	10938	EHD1	64849833	64889769	64855095	3676	10938	EHD1	-	Bcells	3' UTR	NFKB2,TFAP2A,ZEB1,SNAI1,SNAI3,ASCL1,EBF3,TCF12,ZKSCAN5,EBF1,MYOG,SNAI2,SPIB,TCF3,TCF4	NFKB2,RARA::RXRG,SNAI1,ZNF140,ZKSCAN5,SNAI2,ETV5::DRGX	MTA2,FOXP1,IKZF3,HDAC2,POU2F2,CHD4,IRF4,BCOR,FOXO1,STAT3,IKZF1,BCL6,BACH2,CTCF,NCOR2,SPI1
chr11-73152797-73153372	chr11	73152797	73153372	9873	FCHSD2	72833705	73180279	73142261	-10822	9873	FCHSD2	-	Bcells	Distal Intergenic	STAT1::STAT2,ZEB1,NHLH2,SNAI1,ASCL1,ETV7,MYF5,TCF12,ZKSCAN5,EHF,ELF1,ELF3,GABPA,MYOD1,SPIB,TCF3,TCF4	STAT1::STAT2,TBX5,NHLH2,SNAI1,TGIF2LX,ZKSCAN5,EHF,GABPA,CDX1	FOXP1,BCL6,IRF4,BCOR,FOXO1,SPI1,STAT3,NCOR2,KMT2B
chr11-76672325-76673550	chr11	76672325	76673550	2615	LRRC32	76605960	76726499	76670747	-2189	2615	LRRC32	-	Bcells	Distal Intergenic	STAT1::STAT2,NFKB1,NFKB2,PAX9,TFAP2A,ZEB1,IKZF1,SNAI1,SNAI3,TCF12,ZKSCAN5,EBF1,ELF1,GABPA,SPIB,TCF3,TCF4,PAX2,TBX3	STAT1::STAT2,ESRRB,NFKB2,RUNX2,RARA::RXRG,IKZF1,NR2C1,SNAI1,TGIF2LX,ZNF140,HES2,ZKSCAN5,ESRRA,GABPA,FOXO1::ELF1,TBX3	IKZF3,BACH2,BCOR,IKZF1,MTA2,FOXP1,BCL6,STAT3,NCOR2,FOXO1,IRF4,HDAC2,POU2F2,CHD4
chr11-113839707-113840230	chr11	113839707	113840230	57646	USP28	113790725	113890123	113833552	-6415	57646	USP28	-	Bcells	Intron	FIGLA	MEF2D,FIGLA,SOX15,ZNF140,ZNF416	IRF4,BCL6,STAT3,BCOR,SPI1
chr11-113977179-113978138	chr11	113977179	113978138	3359	HTR3A	113953134	114020314	113977500	157	3359	HTR3A	+	Bcells	Promoter	ZEB1,ASCL1,ETV7,EBF3,MYF5,TCF12,EBF1,EHF,ELF1,ELF3,GABPA,SPIB,TCF3,TCF4	NHLH1,ESRRB,CREB1,EHF,ESRRA,GABPA	FOXP1,BCL6,BCOR,FOXO1,NCOR2,STAT3,SPI1,KMT2B,CTCF
chr11-117189492-117190014	chr11	117189492	117190014	51092	SIDT2	117169061	117195969	117189025	727	51092	SIDT2	+	Bcells	Exon	STAT1::STAT2,TFAP2A,FIGLA,ZEB1,SNAI1,SNAI3,EBF3,TCF12,EBF1,ELF1,ELF3,GABPA,SNAI2,SPIB,TCF3,TCF4	STAT1::STAT2,FIGLA,SNAI1,HES2,ZNF449,GABPA,SNAI2,FOXO1::ELF1,FOXO1::FLI1	STAT3,FOXP1,BCOR,FOXO1,IRF4,BCL6,SPI1,IKZF3,BACH2,NCOR2
chr12-4148339-4148935	chr12	4148339	4148935	894	CCND2	4073611	4293281	4273772	-125134	894	CCND2	+	Bcells	Distal Intergenic	NFKB2,TFAP2A,ZEB1,NHLH2,TCF12,ZKSCAN5,SPIB,TCF3	JUND,NFKB2,RARA::RXRG,NHLH2,NR1D1,ZKSCAN5,ESRRA	BCOR,STAT3,BCL6,IRF4,FOXP1,SPI1
chr12-4829349-4829942	chr12	4829349	4829942	3742	KCNA6	4786573	4862121	4814337	15307	3742	KCNA6	+	Bcells	Promoter	POU2F1,POU3F1,POU3F2,POU3F3,POU5F1B,IKZF1,ETV7,EHF,ELF1,ELF3,GABPA,POU2F3,SPIB,POU2F2,POU1F1	MEF2D,POU5F1B,EOMES,ETS2,IKZF1,EHF,GABPA,HOXA7	BCOR,POU2AF1,SPI1,STAT3,BCL6,POU2F2,FOXO1,FOXP1,MTA2,CHD4,HDAC2
chr12-13536430-13536930	chr12	13536430	13536930	2904	GRIN2B	13498593	14173794	13610018	73337	2904	GRIN2B	-	Bcells	Intron	STAT1::STAT2,SPIC,NFKB1,NFKB2,SPIB	STAT1::STAT2,NFIA,SPIC,NFKB2,FOSL1::JUN,FOSL2::JUNB,FOSL2::JUND,SOX15,NR2C1,ESRRA	IRF4,STAT3,BACH2,BCOR,BCL6,SPI1,NCOR2
chr12-14157078-14157623	chr12	14157078	14157623	2904	GRIN2B	13498593	14173794	13981957	-175392	2904	GRIN2B	-	Bcells	Distal Intergenic	STAT1::STAT2,ZEB1,ETV7,TCF12,ZKSCAN5,EHF,ELF1,ELF3,SPIB,TCF3,TCF4	STAT1::STAT2,NFIA,TGIF2LX,ZKSCAN5,EHF,TWIST1,CDX1,DUXA	IKZF1,MTA2,FOXO1,SPI1,BCL6,IRF4,BCOR,STAT3,NCOR2,FOXP1
chr12-26156138-26156713	chr12	26156138	26156713	8082	SSPN	26130048	26311805	26134967	21457	8082	SSPN	+	Bcells	Intron	MSC,SPIC,PAX1,POU3F3,MGA,TBX15,FIGLA,POU5F1,SNAI3,ZKSCAN5,EHF,ELF1,ELF3,GABPA,MYOD1,POU2F3,SNAI2,SPIB,PAX2	SPIC,FIGLA,ELK1,EVX1,ETS2,ZNF140,ZKSCAN5,EHF,GABPA,SNAI2	BCL6,BCOR,FOXO1,NCOR2,FOXP1,STAT3,IRF4,KMT2B,BACH2,SPI1
chr12-31603378-31603892	chr12	31603378	31603892	160518	DENND5B	31376905	31619128	31591097	-12537	160518	DENND5B	-	Bcells	Intron	STAT1::STAT2,POU2F1,POU3F1,POU3F3,MGA,TBX15,POU5F1,ZEB1,SNAI1,SNAI3,ETV7,TCF12,ZKSCAN5,POU2F3,SPIB,TCF3,TCF4,TBX3	STAT1::STAT2,TBX5,LHX5,SNAI1,ZKSCAN5,CEBPA,HLF,HOXA7,TBX3	FOXO1,BCL6,KMT2B,IRF4,FOXP1,BCOR,NCOR2,SPI1,STAT3,BACH2
chr12-40192607-40193153	chr12	40192607	40193153	120892	LRRK2	40151417	40353054	40196744	-3863	120892	LRRK2	+	Bcells	Intron	STAT1::STAT2,NFKB2,PAX1,PAX9,POU3F1,POU3F2,POU5F1,IKZF1,ETV7,ZKSCAN5,EHF,ELF1,SPIB,PAX2	RELA,STAT1::STAT2,NFKB2,IKZF1,ZKSCAN5,EHF,FOXO1::ELF1,CDX1	IKZF1,IRF4,FOXP1,SPI1,BCL6,BCOR,FOXO1,STAT3,NCOR2
chr12-56375663-56376163	chr12	56375663	56376163	319	APOF	56361490	56391956	56362823	-13089	319	APOF	-	Bcells	Distal Intergenic	STAT1::STAT2,SPIC,PAX1,PAX9,FIGLA,IKZF1,NHLH2,ETV7,TCF12,ZKSCAN5,EHF,ELF1,ELF3,GABPA,SPIB,TCF3,TCF4,PAX2	STAT1::STAT2,SPIC,FIGLA,IKZF1,NHLH2,ZKSCAN5,EHF,GABPA,FOXO1::FLI1	FOXP1,BCOR,BCL6,IRF4,FOXO1,STAT3,SPI1
chr12-76511050-76511609	chr12	76511050	76511609	114882	OSBPL8	76360153	76661698	76486108	-25220	114882	OSBPL8	-	Bcells	Intron	MSC,POU3F1,POU3F2,POU3F4,POU5F1B,FIGLA,POU5F1,SNAI1,SNAI3,EBF1,MYOD1,POU2F3,SNAI2,TCF4,POU1F1	POU5F1B,TBX19,FIGLA,SNAI1,SNAI2	BCL6,BCOR
chr12-92172591-92173112	chr12	92172591	92173112	694	BTG1	92144074	92283714	92145897	-26953	694	BTG1	-	Bcells	Intron	STAT1::STAT2,SPIC,POU2F1,POU3F1,POU3F2,POU5F1B,POU5F1,IKZF1,POU2F3,POU2F2	JUND,STAT1::STAT2,SPIC,PHOX2A,POU5F1B,IKZF1,TWIST1,DUXA	IKZF1,BCOR,IKZF3,MTA2,NCOR2,BCL6,FOXP1,FOXO1,SPI1,KMT2B,POU2AF1,BACH2,STAT3,IRF4
chr12-94240032-94240596	chr12	94240032	94240596	10154	PLXNC1	93998692	94289154	94248362	-8047	10154	PLXNC1	+	Bcells	Exon	POU3F4,POU5F1B,POU5F1,IKZF1,ASCL1,MYF5,ZKSCAN5,MYOD1,MYOG,POU2F3	POU5F1B,FOSL1::JUN,IKZF1,ZNF140,ZKSCAN5,MITF	BCL6,BCOR,NCOR2,BACH2,SPI1,STAT3,FOXO1,FOXP1
chr12-104582688-104583188	chr12	104582688	104583188	50515	CHST11	104395548	104590240	104588848	-5909	50515	CHST11	+	Bcells	Intron	MSC,POU5F1B,POU5F1,IKZF1,ZKSCAN5,POU2F3,SPIB	POU5F1B,IKZF1,ZKSCAN5,TWIST1,FOXO1::ELF1	FOXO1,BCOR,FOXP1,CHD4,SPI1,POU2AF1,BCL6,NCOR2,CTCF,STAT3,IKZF1
chr12-107736801-107737327	chr12	107736801	107737327	11108	PRDM4	107717639	107767828	107742593	5528	11108	PRDM4	-	Bcells	Promoter	STAT1::STAT2,SPIC,MGA,TBX15,IKZF1,ETV7,ZKSCAN5,EHF,ELF1,ELF3,GABPA,SPIB	STAT1::STAT2,ELF4,NFIA,SPIC,TBX5,IKZF1,ZKSCAN5,EHF,GABPA,MITF,ETV5::DRGX	BACH2,STAT3,FOXO1,FOXP1,BCL6,SPI1,IRF4,BCOR,CTCF
chr12-113075169-113075669	chr12	113075169	113075669	1840	DTX1	113027968	113099069	113089866	-14446	1840	DTX1	+	Bcells	Intron	NFKB2,PAX1,PAX9,ZEB1,SNAI1,SNAI3,ASCL1,MYF5,TCF12,MYOD1,MYOG,SPIB,TCF3,PAX2	RELA,NFIA,NFKB2,RUNX2,SNAI1,ZNF416	IKZF1,MTA2,BACH2,FOXP1,BCOR,IKZF3,BCL6,CHD4,IRF4,NCOR2,HDAC2,SPI1,STAT3,KMT2B,POU2AF1,FOXO1,POU2F2
chr12-122813251-122813751	chr12	122813251	122813751	9026	HIP1R	122811620	122865923	122834453	-20951	9026	HIP1R	+	Bcells	Exon	STAT1::STAT2,SPIC,IKZF1,EHF,ELF1,ELF3,GABPA,SPIB	STAT1::STAT2,SPIC,TBX19,IKZF1,EHF,GABPA	FOXP1,IKZF1,BCL6,BCOR,STAT3,CTCF,IKZF3,NCOR2,MTA2,SPI1
chr12-131923282-131923782	chr12	131923282	131923782	8408	ULK1	131872244	131924633	131920067	3464	8408	ULK1	+	Bcells	Downstream	NFKB1,NFKB2,POU3F1,POU3F2,POU3F4,POU5F1B,TFAP2A,POU5F1,IKZF1,NHLH2,SNAI1,SNAI3,ASCL1,EBF3,TCF12,EBF1,POU2F3,SNAI2,TCF3,TCF4	NHLH1,NFKB2,POU5F1B,IKZF1,NHLH2,NR2C1,SNAI1,SNAI2	IKZF1,BCOR,MTA2,POU2AF1,IKZF3,BCL6,POU2F2,FOXP1,NCOR2,HDAC2
chr12-132070983-132071492	chr12	132070983	132071492	57634	EP400	131945424	132079992	132068099	3137	57634	EP400	+	Bcells	Intron	STAT1::STAT2,FIGLA,NHLH2,ASCL1,MYF5,GABPA,MYOD1,MYOG,SPIB	STAT1::STAT2,FIGLA,ELK1,ETS2,NHLH2,GABPA,ZNF416	BCOR,IRF4,BCL6,FOXO1,SPI1,STAT3,FOXP1,IKZF3,IKZF1
chr13-41199421-41199921	chr13	41199421	41199921	84078	KBTBD7	41163657	41210567	41194566	-5104	84078	KBTBD7	-	Bcells	Exon	POU5F1,ETV7,EHF,ELF1,ELF3,GABPA,POU2F3	ELF4,CEBPA,EHF,GABPA,ETV5::DRGX,MNX1	IRF4,IKZF1,FOXO1,BCOR,BCL6,SPI1,NCOR2,STAT3,POU2AF1,FOXP1
chr13-73967710-73968210	chr13	73967710	73968210	11278	KLF12	73779647	74276539	73995049	27088	11278	KLF12	-	Bcells	Intron	SPIC,POU2F1,POU3F1,POU3F2,POU5F1,IKZF1,POU2F3,PAX2,POU2F2	SPIC,FOSL1::JUN,FOSL2::JUNB,FOSL2::JUND,IKZF1,HOXA7	IKZF1,BACH2,MTA2,FOXO1,IRF4,BCL6,NCOR2,BCOR,FOXP1,KMT2B,POU2AF1,SPI1
chr13-99420102-99420850	chr13	99420102	99420850	337867	UBAC2	99361960	99432262	99367787	52688	337867	UBAC2	+	Bcells	Distal Intergenic	STAT1::STAT2,SPIC,ZEB1,IKZF1,EHF,ELF1,ELF3,MYOD1,TCF4	STAT1::STAT2,SPIC,RUNX2,IKZF1,NR2C1,ZSCAN29,ZNF449,EHF	MTA2,CHD4,BCOR,HDAC2,IKZF1,IKZF3,IRF4,FOXP1,STAT3,BCL6,NCOR2,SPI1,BACH2
chr13-99542607-99543483	chr13	99542607	99543483	9375	TM9SF2	99501235	99558811	99540511	2533	9375	TM9SF2	+	Bcells	Intron	SPIC,IKZF1,SNAI1,SNAI3,EHF,GABPA,MYOD1,SNAI2,TCF4	SPDEF,SPIC,IKZF1,SNAI1,ZNF140,EHF,GABPA,LHX2,SNAI2,FOXO1::ELF1,FOXO1::FLI1	FOXO1,IRF4,BCL6,SPI1,FOXP1,BACH2,BCOR,NCOR2
chr14-64235486-64236459	chr14	64235486	64236459	23224	SYNE2	64096786	64239379	64218232	17739	23224	SYNE2	+	Bcells	Intron	EBF3,EBF1,SPIB,TCF4,PAX2	NFIA,MEF2D,TEF,GMEB2,EVX1,SOX15,HES2,TWIST1,CDX1	BCOR,FOXO1,FOXP1,SPI1,BCL6,BACH2,NCOR2,IRF4,STAT3
chr14-74401296-74402361	chr14	74401296	74402361	646658	SYNDIG1L	74379110	74453153	74409806	7977	646658	SYNDIG1L	-	Bcells	Distal Intergenic	NFKB1,NFKB2,MGA,TBX15,TFAP2A,IKZF1,EBF3,ZKSCAN5,EBF1,ELF1,ELF3,TBX3	MEF2D,NFKB2,EOMES,TBX5,RARA::RXRG,IKZF1,NR1D1,TGIF2LX,ZKSCAN5,ETV5::DRGX,TBX21,TBX3	HDAC2,POU2F2,BCOR,BCL6,STAT3,FOXP1,CHD4,SPI1
chr14-89383990-89384490	chr14	89383990	89384490	1112	FOXN3	89011115	89775871	89401665	17424	1112	FOXN3	-	Bcells	Intron	STAT1::STAT2,MSC,TFAP2A,FIGLA,NHLH2,EBF3,MYF5,EBF1,MYOD1	STAT1::STAT2,NHLH1,FIGLA,FOSL1::JUN,NHLH2,TGIF2LX,TWIST1	MTA2,BCOR,BCL6,FOXP1,IKZF1,NCOR2,IRF4,FOXO1,SPI1,IKZF3,STAT3,POU2F2,HDAC2,BACH2
chr14-95327788-95328288	chr14	95327788	95328288	101929080	LINC02292	95324746	95392886	95329584	-1545	101929080	LINC02292	+	Bcells	Intron	STAT1::STAT2,PAX1,PAX9,FIGLA,SNAI3,MYOD1,SNAI2,SPIB	STAT1::STAT2,FIGLA,ZNF136,ZNF449,SNAI2	BCOR,BCL6,NCOR2,IRF4,SPI1,STAT3,FOXP1
chr15-31230746-31231246	chr15	31230746	31231246	4308	TRPM1	31066617	31244064	31161273	-69722	4308	TRPM1	-	Bcells	Promoter	PAX1,PAX9,POU5F1,NHLH2,POU2F3,PAX2	NHLH1,NHLH2,HES2,CREB1,TWIST1	IKZF1,MTA2,POU2AF1,HDAC2,IKZF3,POU2F2,STAT3,FOXP1,SPI1,CHD4
chr15-50444568-50445068	chr15	50444568	50445068	9101	USP8	50389895	50518666	50439043	5774	9101	USP8	+	Bcells	Exon	SPIC,PAX1,PAX9,MGA,TBX15,FIGLA,ZEB1,IKZF1,NHLH2,SNAI1,SNAI3,ETV7,EBF3,ZKSCAN5,EHF,ELF1,ELF3,GABPA,SNAI2,SPIB,PAX2,TBX3	ELF4,SPIC,TBX5,FIGLA,IKZF1,NHLH2,SNAI1,ZKSCAN5,EHF,GABPA,SNAI2,FOXO1::ELF1,FOXO1::FLI1,ZNF416,TBX3	FOXP1,BCOR,SPI1,BCL6,STAT3,NCOR2,FOXO1,IRF4,BACH2,IKZF1
chr15-70240007-70240507	chr15	70240007	70240507	7090	TLE3	70087127	70356861	70098176	-142080	7090	TLE3	-	Bcells	Distal Intergenic	SPIC,NFKB1,MGA,TBX15,FIGLA,ZEB1,NHLH2,SNAI1,SNAI3,SNAI2,SPIB,TBX3	RELA,SPIC,TBX5,FIGLA,NHLH2,SNAI1,SNAI2,TBX21,TBX3	STAT3,BCL6,SPI1,FOXP1,IRF4
chr15-70319487-70319987	chr15	70319487	70319987	7090	TLE3	70087127	70356861	70098176	-221560	7090	TLE3	-	Bcells	Distal Intergenic	STAT1::STAT2,EHF,ELF1,ELF3,GABPA,SPIB	STAT1::STAT2,ELF4,SPDEF,EOMES,ELK1,ZNF140,EHF,GABPA	BCOR,FOXP1,IRF4,BCL6,FOXO1,STAT3,NCOR2,KMT2B,SPI1,BACH2
chr15-81291993-81293027	chr15	81291993	81293027	3603	IL16	81158424	81314935	81296913	-4402	3603	IL16	+	Bcells	3' UTR	ASCL1,EBF3,MYF5,EBF1,MYOD1,MYOG,TBX3	NFIA,NHLH1,ESRRB,TBX19,TBX5,TGIF2LX,ZNF140,ZNF449,ZNF416,TBX21,TBX3	IKZF1,FOXP1,BCOR,BCL6,STAT3,SPI1,IKZF3
chr15-89441375-89441875	chr15	89441375	89441875	51458	RHCG	89433014	89510183	89479430	37804	51458	RHCG	-	Bcells	Distal Intergenic	TFAP2A,IKZF1,NHLH2,MYF5,ZKSCAN5,MYOD1,SNAI2,SPIB	RORA,RARA::RXRG,IKZF1,NHLH2,ZKSCAN5,ZNF449,SNAI2,CDX1	BCL6,IRF4,SPI1,FOXP1,BCOR
chr16-1458919-1459419	chr16	1458919	1459419	1186	CLCN7	1446583	1482023	1459330	160	1186	CLCN7	-	Bcells	Promoter	NFKB1,MGA,TBX15,EBF3,EBF1,MYOD1,TBX3	RELA,TBX21,TBX3	IRF4,CTCF,SPI1,BCOR,BCL6
chr16-10297326-10297867	chr16	10297326	10297867	80063	ATF7IP2	10254595	10515539	10326434	-28837	80063	ATF7IP2	+	Bcells	Distal Intergenic	POU3F1,POU3F2,POU3F4,POU5F1B,MGA,TBX15,POU5F1,POU2F3,SPIB,TBX3	POU5F1B,TBX5,FOXO1::ELF1,FOXO1::FLI1,TBX3	STAT3,BCL6,BCOR,NCOR2,IRF4,FOXP1,SPI1
chr16-10912573-10913073	chr16	10912573	10913073	4261	CIITA	10847997	10932321	10915646	-2822	4261	CIITA	+	Bcells	Intron	SPIB,TBX3	EOMES,ELK1,SOX15,ETS2,ZNF416,TBX21,TBX3	CHD4,MTA2,IKZF3,BCOR,FOXP1,HDAC2,FOXO1,BCL6,NCOR2,KMT2B,POU2F2,SPI1,IKZF1,STAT3,CTCF,IRF4
chr16-23516657-23517204	chr16	23516657	23517204	23062	GGA2	23461382	23528606	23521995	5064	23062	GGA2	-	Bcells	Intron	ZEB1,ETV7,ZKSCAN5,EHF,ELF1,ELF3,GABPA,SPIB	LHX5,ZKSCAN5,CREB1,EHF,GABPA,FOXO1::ELF1,HOXA7	IKZF1,FOXP1,BCL6,SPI1,FOXO1,BCOR,MTA2,STAT3,NCOR2
chr16-29339149-29339658	chr16	29339149	29339658	440352	SNX29P2	29140399	29344458	29291220	48182	440352	SNX29P2	+	Bcells	Intron	MSC,FIGLA,ZEB1,NHLH2,SNAI1,SNAI3,ASCL1,MYF5,TCF12,ELF1,ELF3,GABPA,MYOD1,MYOG,TCF3,TCF4	NHLH1,FIGLA,NHLH2,SNAI1,GABPA	BCOR,BCL6,IKZF1,FOXP1,SPI1
chr16-57413317-57413872	chr16	57413317	57413872	6361	CCL17	57390870	57422257	57413869	-274	6361	CCL17	+	Bcells	Promoter	ETV7,MYF5,ZKSCAN5,SPIB	RORA,RELA,ZKSCAN5	BCL6,FOXP1,BCOR,IRF4,STAT3,SPI1
chr16-67517565-67518434	chr16	67517565	67518434	79567	RIPOR1	67501116	67553972	67518418	-418	79567	RIPOR1	+	Bcells	Promoter	MSC,MGA,TBX15,ASCL1,EBF3,MYF5,ZKSCAN5,MYOD1,MYOG,SPIB,TBX3	RORA,NHLH1,MEF2D,EOMES,TBX5,ZNF140,ZKSCAN5,FOXO1::FLI1,TBX3	BCOR,FOXP1,FOXO1,BCL6,SPI1,STAT3,NCOR2
chr16-81501084-81501658	chr16	81501084	81501658	80790	CMIP	81415095	81514625	81495349	6021	80790	CMIP	+	Bcells	Intron	STAT1::STAT2,TFAP2A,EBF1	STAT1::STAT2,NFIA,ZNF136	BCOR,IKZF1,FOXP1,STAT3,BCL6,NCOR2,IRF4,CTCF,SPI1
chr16-81808892-81809496	chr16	81808892	81809496	5336	PLCG2	81721478	81975046	81798466	10727	5336	PLCG2	+	Bcells	Intron	STAT1::STAT2,MSC,TFAP2A,FIGLA,MYOD1,SNAI2	STAT1::STAT2,FIGLA,ZNF140,SNAI2	BCOR,FOXP1,BCL6,IRF4,SPI1,NCOR2,FOXO1,STAT3,BACH2
chr16-85756267-85756767	chr16	85756267	85756767	404550	C16orf74	85700462	85766193	85751129	-5387	404550	C16orf74	-	Bcells	Distal Intergenic	MGA,TBX15,FIGLA,ZEB1,IKZF1,POU2F3,TBX3	TBX5,FIGLA,IKZF1,NR1D1,TBX21,TBX3	FOXP1,IKZF1,IRF4,MTA2,FOXO1,NCOR2,POU2AF1,KMT2B,BACH2,IKZF3
chr16-87810343-87810843	chr16	87810343	87810843	102465464	MIR6775	87800327	87835732	87834660	24066	102465464	MIR6775	-	Bcells	Distal Intergenic	SPIC,MGA,TBX15,ETV7,ZKSCAN5,MYOD1,SNAI2,SPIB,TCF4	SPIC,ZKSCAN5,ZNF449,SNAI2,ETV5::DRGX	IKZF3,MTA2,FOXP1,BCOR,BACH2,BCL6,IRF4,FOXO1,NCOR2,SPI1,STAT3,CTCF
chr16-88968114-88968684	chr16	88968114	88968684	863	CBFA2T3	88873349	89032789	88977080	8680	863	CBFA2T3	-	Bcells	Intron	STAT1::STAT2,NFKB2,FIGLA,ZEB1,NHLH2,EBF3,MYF5,TCF12,EBF1,MYOD1,TCF3,TCF4	RORA,STAT1::STAT2,NHLH1,NFKB2,FIGLA,RARA::RXRG,NHLH2,NR2C1,ZNF416	BCOR,IKZF3,MTA2,POU2F2,HDAC2,POU2AF1,FOXO1,BCL6,NCOR2,IRF4,FOXP1,IKZF1,SPI1,STAT3,CTCF
chr17-27217498-27218051	chr17	27217498	27218051	100616277	MIR4522	24908554	27294036	27293996	76221	100616277	MIR4522	-	Bcells	Distal Intergenic	NFKB1,NFKB2,FIGLA,SNAI1,SNAI3,MYOD1,SNAI2	RELA,NFKB2,FIGLA,SNAI1,MITF,SNAI2	BCL6,SPI1,STAT3,BCOR,FOXP1,NCOR2,BACH2,CTCF
chr17-48111524-48112024	chr17	48111524	48112024	29916	SNX11	48102440	48124950	48111949	-174	29916	SNX11	+	Bcells	Promoter	NFKB1,NFKB2,TFAP2A,EBF3	RELA,NFKB2,NR1D1,ZNF140,TWIST1	BCOR,FOXP1,BCL6,IRF4,STAT3
chr17-63931851-63932650	chr17	63931851	63932650	974	CD79B	63924677	63941029	63932261	10	974	CD79B	-	Bcells	Promoter	POU5F1B,TFAP2A,POU5F1,NHLH2,EBF3,MYF5,ZKSCAN5,EBF1,MYOD1,SPIB	POU5F1B,NHLH2,ZKSCAN5,ZNF416	HDAC2,CTCF,POU2AF1,IKZF1,IKZF3,MTA2,BCOR,BCL6,FOXP1,POU2F2,SPI1,NCOR2,IRF4,STAT3
chr17-67813122-67813622	chr17	67813122	67813622	2186	BPTF	67784455	67984663	67825524	-12151	2186	BPTF	+	Bcells	Distal Intergenic	POU2F1,POU3F4,POU5F1B,MGA,TBX15,FIGLA,POU5F1,ZEB1,SNAI1,SNAI3,EBF3,TCF12,POU2F3,SNAI2,TCF3,TCF4,POU2F2,TBX3	JUND,POU5F1B,RUNX2,TBX5,FIGLA,NR1D1,NR2C1,SNAI1,CREB1,SNAI2,TBX3	IKZF1,POU2AF1,HDAC2,MTA2,BCOR,BCL6,FOXO1,NCOR2,POU2F2,IKZF3,KMT2B,STAT3,FOXP1
chr17-82449067-82449939	chr17	82449067	82449939	79415	C17orf62	82442322	82450741	82449605	101	79415	C17orf62	-	Bcells	Promoter	STAT1::STAT2,SPIC,ZEB1,IKZF1,NHLH2,SNAI1,SNAI3,ASCL1,EBF3,TCF12,EBF1,MYOG,SPIB,TCF3,TCF4	STAT1::STAT2,NHLH1,SPIC,ELK1,ETS2,IKZF1,NHLH2,SNAI1,ZNF449	IKZF1,IKZF3,MTA2,CHD4,BCOR,CTCF,FOXO1,POU2F2,BCL6,FOXP1,POU2AF1,KMT2B,NCOR2,HDAC2,STAT3,BACH2,SPI1
chr18-32884476-32884976	chr18	32884476	32884976	57565	KLHL14	32621326	32954569	32773062	-111663	57565	KLHL14	-	Bcells	Intron	MSC,NFKB1,NFKB2,SPIB	RELA,NFKB2,ZNF136,SOX2,ZNF416,CDX1	SPI1,BCL6,FOXP1,NCOR2,BCOR,BACH2,STAT3
chr18-51251572-51252082	chr18	51251572	51252082	51320	MEX3C	51137286	51305151	51218304	-33522	51320	MEX3C	-	Bcells	Distal Intergenic	NFKB1,NFKB2,MGA,TBX15,ETV7,EBF3,ZKSCAN5,EBF1,EHF,ELF3,SPIB,TBX3	NFKB2,EOMES,ZKSCAN5,EHF,TBX3	BCL6,IRF4,FOXP1,CTCF,SPI1,BCOR,STAT3
chr18-63292496-63293634	chr18	63292496	63293634	596	BCL2	63034079	63328075	63319786	26720	596	BCL2	-	Bcells	Intron	NFKB2,ZEB1,ETV7,TCF12,EHF,ELF3,TCF3	RELA,NHLH1,NFKB2,FOSL1::JUN,FOSL2::JUNB,FOSL2::JUND,ZNF449,EHF,ZNF416	IRF4,STAT3,SPI1,BCL6,BCOR
chr18-63311594-63312113	chr18	63311594	63312113	596	BCL2	63034079	63328075	63319786	7932	596	BCL2	-	Bcells	Intron	NFKB1,NFKB2,ZEB1,SNAI1,TCF12,SNAI2,TCF3,TCF4	RELA,NHLH1,MEF2D,NFKB2,SNAI1,ESRRA,SNAI2,FOXO1::FLI1	BACH2,IRF4,STAT3,BCL6,SPI1
chr19-2681374-2681967	chr19	2681374	2681967	2788	GNG7	2657204	2712025	2683691	2020	2788	GNG7	-	Bcells	Intron	STAT1::STAT2,MSC,POU3F1,POU3F2,POU3F4,POU5F1B,MGA,TBX15,POU5F1,ASCL1,MYF5,ZKSCAN5,EBF1,MYOG,POU2F3,SPIB,TBX3	STAT1::STAT2,POU5F1B,SOX15,NR1D1,ZKSCAN5,TBX21,TBX3	IRF4,FOXO1,FOXP1,BCOR,BCL6,SPI1,NCOR2,STAT3,IKZF1,POU2AF1
chr19-7701464-7702493	chr19	7701464	7702493	2208	FCER2	7690180	7717119	7702093	114	2208	FCER2	-	Bcells	Promoter	STAT1::STAT2,TFAP2A,IKZF1,EBF3,ZKSCAN5,EBF1,EHF,ELF1,ELF3,GABPA,SPIB	STAT1::STAT2,ESRRB,TBX19,IKZF1,ZSCAN29,ZKSCAN5,EHF,GABPA,TWIST1	CHD4,BCOR,STAT3,BCL6,IRF4,SPI1,CTCF,FOXP1,NCOR2
chr19-35330421-35330921	chr19	35330421	35330921	933	CD22	35314937	35345122	35332016	-1344	933	CD22	+	Bcells	5' UTR	POU2F1,POU3F4,POU5F1B,ZEB1,EBF3,TCF12,EBF1,ELF1,ELF3,POU2F3,TCF3,POU2F2	POU5F1B,CREB1	HDAC2,BCOR,FOXO1,IKZF1,MTA2,POU2F2,POU2AF1,BCL6,IKZF3,NCOR2,SPI1,FOXP1,KMT2B,STAT3,IRF4
chr19-42465734-42466260	chr19	42465734	42466260	284340	CXCL17	42435140	42477066	42443048	-22948	284340	CXCL17	-	Bcells	Intron	STAT1::STAT2,TFAP2A,ASCL1,EBF1,MYOG	STAT1::STAT2,SOX15,ZNF140	CTCF,FOXP1,IRF4,BCL6,BCOR,SPI1,STAT3
chr20-5691873-5692373	chr20	5691873	5692373	149840	C20orf196	5680710	5830941	5750393	-58269	149840	C20orf196	+	Bcells	Distal Intergenic	MSC,NFKB1,NFKB2,FIGLA,ZEB1,SNAI1,SNAI3,ASCL1,ETV7,TCF12,ZKSCAN5,SNAI2,TCF3,TCF4	NFKB2,FIGLA,SNAI1,ZKSCAN5,SNAI2,ETV5::DRGX	IKZF3,IKZF1,MTA2,FOXP1,BCL6,FOXO1,POU2F2,NCOR2,BCOR,STAT3,CHD4
chr20-44586243-44586784	chr20	44586243	44586784	11142	PKIG	44526948	44620399	44582549	3963	11142	PKIG	+	Bcells	Intron	MSC,POU5F1B,FIGLA,POU5F1,IKZF1,SNAI1,SNAI3,ASCL1,EBF3,GABPA,MYOD1,POU2F3,SNAI2,SPIB,TCF4	LBX2,POU5F1B,FIGLA,DLX6,IKZF1,SNAI1,LHX9,ZNF449,GABPA,SNAI2	BCOR,FOXP1,CTCF,BACH2,BCL6,STAT3,MTA2,FOXO1,NCOR2,SPI1,IKZF1
chr20-47412537-47413037	chr20	47412537	47413037	23613	ZMYND8	47232934	47429395	47356889	-55897	23613	ZMYND8	-	Bcells	Promoter	STAT1::STAT2,NHLH2,SNAI1,SNAI3,ETV7,MYOD1,SNAI2,SPIB,TCF4	STAT1::STAT2,TBX5,NHLH2,NR1D1,SNAI1,SNAI2,TWIST1	MTA2,IKZF1,FOXO1,FOXP1,BCL6,BCOR,NCOR2,IRF4,BACH2
chr20-47416503-47417011	chr20	47416503	47417011	23613	ZMYND8	47232934	47429395	47356889	-59867	23613	ZMYND8	-	Bcells	Distal Intergenic	MSC,MGA,TBX15,FIGLA,SNAI3,MYOD1,SNAI2	EOMES,FIGLA,SNAI2,TBX21	FOXO1,FOXP1,IKZF1,STAT3,BCL6,SPI1,MTA2,BCOR,NCOR2,BACH2
chr21-29293404-29293939	chr21	29293404	29293939	571	BACH1	29194110	29327202	29298871	-5199	571	BACH1	+	Bcells	Intron	SPIC,IKZF1,NHLH2,ETV7,EBF3,EHF,ELF1,ELF3,GABPA,SPIB	ELF4,SPIC,SOX15,IKZF1,NHLH2,ZNF449,CEBPA,EHF,GABPA	STAT3,MTA2,HDAC2,BCL6,BCOR,POU2F2,IKZF1,IRF4,NCOR2,SPI1,CHD4
chr22-17594558-17595058	chr22	17594558	17595058	529	ATP6V1E1	17582500	17628747	17595292	483	529	ATP6V1E1	-	Bcells	Exon	POU2F1,POU3F4,POU5F1B,POU5F1,IKZF1,SNAI3,ZKSCAN5,GABPA,POU2F3,SNAI2,SPIB,POU2F2	RELA,MEF2D,POU5F1B,IKZF1,ZSCAN29,HOXC9,ZKSCAN5,GABPA,SNAI2,ETV5::DRGX	BCOR,IKZF1,IKZF3,HDAC2,POU2AF1,MTA2,SPI1,BCL6,FOXP1,POU2F2,STAT3,FOXO1,NCOR2,BACH2
chr22-22422578-22423199	chr22	22422578	22423199	140883	ZNF280B	22405971	22514712	22489468	66579	140883	ZNF280B	-	Bcells	Distal Intergenic	STAT1::STAT2,SPIC,POU2F1,POU3F1,POU3F2,POU3F3,POU3F4,POU5F1B,POU5F1,IKZF1,NHLH2,ASCL1,EHF,ELF1,ELF3,GABPA,MYOG,POU2F3,SPIB,POU2F2,POU1F1	STAT1::STAT2,NHLH1,SPIC,MEF2D,POU5F1B,IKZF1,NHLH2,ZNF449,EHF,GABPA,HLF,FOXO1::ELF1,FOXO1::FLI1	CTCF,MTA2,IKZF1,HDAC2,STAT3,IKZF3,POU2AF1,FOXP1,POU2F2,SPI1
chr22-22934865-22936074	chr22	22934865	22936074	100423062	IGLL5	22887024	22979095	22887829	47639	100423062	IGLL5	+	Bcells	Distal Intergenic	STAT1::STAT2,SPIC,ZEB1,IKZF1,NHLH2,ASCL1,ETV7,EBF3,ZKSCAN5,EHF,ELF1,ELF3,GABPA,SPIB	RELA,STAT1::STAT2,SPIC,ESRRB,IKZF1,NHLH2,ZSCAN29,ZKSCAN5,EHF,ESRRA,GABPA,ZNF416	HDAC2,MTA2,IKZF1,IKZF3,BCL6,FOXP1,IRF4,KMT2B,CHD4,FOXO1,NCOR2,SPI1,BCOR,POU2F2,STAT3,CTCF
chr22-23752304-23752804	chr22	23752304	23752804	7621	ZNF70	23734225	23752750	23751092	-1461	7621	ZNF70	-	Bcells	3' UTR	MSC,SPIC,ZEB1,IKZF1,NHLH2,SNAI1,SNAI3,TCF12,EBF1,SNAI2,TCF3,TCF4	SPIC,RARA::RXRG,IKZF1,NHLH2,SNAI1,SNAI2	POU2F2,HDAC2,FOXP1,BCOR,MTA2,FOXO1,NCOR2,BCL6,STAT3,KMT2B,POU2AF1,SPI1,CTCF,CHD4
chr22-41936143-41936643	chr22	41936143	41936643	79019	CENPM	41933519	41961718	41940219	3825	79019	CENPM	-	Bcells	Distal Intergenic	PAX1,PAX9,NHLH2,EBF3,ELF1,ELF3,GABPA,PAX2	NHLH1,NHLH2,CREB1,GABPA	IKZF1,IKZF3,MTA2,FOXP1,HDAC2,FOXO1,BCOR,BCL6,BACH2,NCOR2,CTCF,STAT3,SPI1
chrX-1502198-1502745	chrX	1502198	1502745	286530	P2RY8	1474058	1564350	1494353	-8117	286530	P2RY8	-	Bcells	Intron	TFAP2A,ZEB1,IKZF1,SNAI1,TCF12,ZKSCAN5,TCF3,TCF4	IKZF1,SNAI1,ZKSCAN5
chrX-1521447-1522103	chrX	1521447	1522103	286530	P2RY8	1474058	1564350	1537107	15331	286530	P2RY8	-	Bcells	Intron	STAT1::STAT2,SPIC,NFKB1,POU3F1,POU3F2,POU5F1B,POU5F1,ETV7,ZKSCAN5,EHF,ELF1,ELF3,GABPA,POU2F3,SPIB,POU2F2	STAT1::STAT2,ELF4,SPIC,POU5F1B,ELK1,ETS2,ZKSCAN5,EHF,GABPA
chrX-110172159-110172659	chrX	110172159	110172659	84187	TMEM164	110113487	110231305	110144855	27553	84187	TMEM164	+	Bcells	Intron	STAT1::STAT2,SPIC,MGA,TBX15,ZEB1,SNAI1,ASCL1,TCF12,ZKSCAN5,EHF,MYOD1,SNAI2,SPIB,TCF3,TCF4,TBX3	STAT1::STAT2,SPIC,EOMES,FOSL1::JUN,FOSL2::JUNB,FOSL2::JUND,SNAI1,ZKSCAN5,EHF,SNAI2,ETV5::DRGX,TBX21,TBX3
chr1-2809740-2810240	chr1	2809740	2810240	100287898	TTC34	2711373	2905619	2789755	-20234	100287898	TTC34	-	Neutrophils	Distal Intergenic	EHF
chr1-2828787-2829287	chr1	2828787	2829287	100287898	TTC34	2711373	2905619	2789755	-39281	100287898	TTC34	-	Neutrophils	Distal Intergenic		RARA::RXRA,HIC2,MNT,MYC,ZEB1,NHLH2,ZNF549,TCF4,TFAP4::ETV1
chr1-2915663-2916163	chr1	2915663	2916163	140625	ACTRT2	2905620	3041617	3021483	-105569	140625	ACTRT2	+	Neutrophils	Distal Intergenic		POU3F4,SOX13,ZEB1,KLF6,ZBTB32
chr1-3270097-3270597	chr1	3270097	3270597	63976	PRDM16	3068803	3439821	3244132	26214	63976	PRDM16	+	Neutrophils	Intron		ZNF528
chr1-11955117-11955617	chr1	11955117	11955617	5351	PLOD1	11930317	11975862	11954301	1065	5351	PLOD1	+	Neutrophils	Intron	EHF,SPIB	NR2F1,RUNX2,MGA,TBX4,ATF4,ETV1,SPIB,TCF4,ETV2::FOXI1,ETV5::FOXI1,ZFP14	CTCF,SMC3,RAD21,SPI1
chr1-12688981-12689481	chr1	12688981	12689481	126767	AADACL3	12680332	12731179	12716115	-26883	126767	AADACL3	+	Neutrophils	Distal Intergenic	SPIC,EHF,SPIB	SPIC,TBX4,ZEB1,ETV1,GABPA,NFIL3,SPIB,TCF4,ETV5::DRGX	CTCF,SPI1
chr1-21536602-21537102	chr1	21536602	21537102	249	ALPL	21491384	21597259	21551279	-14426	249	ALPL	+	Neutrophils	Intron	SPIC	SPIC,MGA,TBX3	RAD21,SMC3,CTCF
chr1-29521983-29522483	chr1	29521983	29522483	101928460	LINC01756	29336667	29693863	29350114	-172118	101928460	LINC01756	-	Neutrophils	Distal Intergenic		MGA,TBX4,ZEB1,ATF2,ZNF549,TBX3
chr1-38392807-38393307	chr1	38392807	38393307	339442	LINC01343	38152000	38531420	38214767	-178289	339442	LINC01343	-	Neutrophils	Distal Intergenic	EHF	CEBPG,ZBTB7A,ETS2,HOXB9,ETV1,GABPA	SMC3,RAD21,CTCF,SPI1
chr1-38482241-38482798	chr1	38482241	38482798	339442	LINC01343	38152000	38531420	38214767	-267751	339442	LINC01343	-	Neutrophils	Intron	SPIB	PBX1,ZBTB18,NHLH2,SPIB	SMC3,RAD21,CTCF,SPI1
chr1-38493234-38493734	chr1	38493234	38493734	339442	LINC01343	38152000	38531420	38214767	-278716	339442	LINC01343	-	Neutrophils	Exon	SPIC,ETV7,SPIB	SPIC,TBXT,ZNF341,PHOX2B,SPIB,ZFP14	SMC3,RAD21,SPI1
chr1-147648928-147649428	chr1	147648928	147649428	51205	ACP6	147631148	147715551	147650682	1503	51205	ACP6	-	Neutrophils	Intron	EHF	ETV1,GABPA	RAD21,CTCF,SPI1
chr1-150777430-150777930	chr1	150777430	150777930	1520	CTSS	150735490	150786362	150765957	-11722	1520	CTSS	-	Neutrophils	Distal Intergenic	ETV7,EHF,SPIB	HIC2,ETV1,GABPA,MYOD1,SPIB,TCF4,ETV2::FOXI1,ETV5::FOXI1,FOXO1::FLI1,ZFP14	SMC3,RAD21,SPI1
chr1-158793518-158794054	chr1	158793518	158794054	81442	OR6N2	158772159	158804476	158777635	-16150	81442	OR6N2	-	Neutrophils	Distal Intergenic	ETV7,EHF,SPIB	ZBTB18,ZEB1,ZBTB32,ETV1,GABPA,SPIB,TCF4,ZFP14	CTCF,RAD21,SMC3,SPI1
chr1-207070776-207071276	chr1	207070776	207071276	5208	PFKFB2	207053121	207079743	207070645	380	5208	PFKFB2	+	Neutrophils	3' UTR	SPIC,ETV7,EHF	SPIC,RARA::RXRG,ETS2,NKX2-2,ETV1,GABPA,ETV2::FOXI1,ETV5::FOXI1,FOXO1::FLI1	SMC3
chr1-248739318-248740181	chr1	248739318	248740181	646627	LYPD8	248713792	248786292	248745279	5529	646627	LYPD8	-	Neutrophils	3' UTR	SPIB	ESRRB,ZEB1,RARA::RXRG,ZNF341,ZNF549,ETV1,FOXA2,GABPA,MYOD1,NKX2-5,SPIB,TCF4,ZFP14	SPI1,RAD21
chr2-3056970-3057470	chr2	3056970	3057470	101927554	LINC01250	2728644	3160208	3126026	68805	101927554	LINC01250	-	Neutrophils	Intron		ZBTB18,MGA,TBX4,ZNF8,HAND2,POU2F1::SOX2,TFAP4::ETV1	SMC3,SPI1
chr2-3079461-3079961	chr2	3079461	3079961	101927554	LINC01250	2728644	3160208	3126026	46314	101927554	LINC01250	-	Neutrophils	Intron	SPIB	RARA::RXRA,ATF4,SPIB,TFAP4::ETV1	SMC3,CTCF,SPI1
chr2-26455631-26456367	chr2	26455631	26456367	92749	DRC1	26374367	26457312	26448299	7699	92749	DRC1	+	Neutrophils	Intron	ETV7,EHF	RARA::RXRA,NR2F1,ZEB1,PPARA::RXRA,RARA::RXRG,MAFA,NHLH2,THRB,ETV1,GABPA,MYOD1,TCF4	SMC3,CTCF,RAD21
chr2-30495832-30496332	chr2	30495832	30496332	253558	LCLAT1	30340747	30589943	30447403	48678	253558	LCLAT1	+	Neutrophils	Intron	ETV7,SPIB	RAX2,BSX,ETS2,ZNF341,ETV1,SPIB	SMC3,RAD21,SPI1
chr2-69977146-69977646	chr2	69977146	69977646	151516	ASPRV1	69938699	70024859	69962265	-15130	151516	ASPRV1	-	Neutrophils	Intron		ESRRB,SOX13,ZEB1,ZBTB32,FOXA2,TCF4	RAD21,SMC3,CTCF,SPI1
chr2-109295113-109295613	chr2	109295113	109295613	100423027	MIR4266	109227607	109463776	109313625	18261	100423027	MIR4266	-	Neutrophils	Intron		RUNX2,MTF1,ZEB1,NHLH2,TCF4,TFAP4::ETV1
chr2-111022614-111023167	chr2	111022614	111023167	55289	ACOXL	110705344	111055071	110995957	26932	55289	ACOXL	+	Neutrophils	Intron	SPIB	TBXT,ZNF549,SPIB	SMC3,RAD21,SPI1,CTCF
chr2-120209894-120210701	chr2	120209894	120210701	79134	TMEM185B	120191988	120231736	120223408	13110	79134	TMEM185B	-	Neutrophils	Intron	ETV7,SPIB	RARA::RXRA,NR2F1,MEIS3,MGA,MTF1,RARA::RXRG,ZNF549,SPIB,FOXO1::FLI1,ZFP14	CTCF,SMC3,RAD21,SPI1
chr2-120264975-120265548	chr2	120264975	120265548	5899	RALB	120231737	120299797	120253451	11809	5899	RALB	+	Neutrophils	Intron	SPIC	SPIC,TBX4,MTF1,SOX13,ZBTB32,FOXA2	SMC3,CTCF,RAD21
chr2-218156003-218156503	chr2	218156003	218156503	3577	CXCR1	218148923	218192044	218166995	10741	3577	CXCR1	-	Neutrophils	Distal Intergenic	ETV7	KLF6,ZBTB32,ZNF549	SMC3,RAD21,CTCF,SPI1
chr3-14569978-14570552	chr3	14569978	14570552	80852	GRIP2	14492551	14596922	14542081	-28183	80852	GRIP2	-	Neutrophils	Distal Intergenic	EHF	RARA::RXRA,ESRRB,ZBTB7A,ZEB1,PPARA::RXRA,THRB,ZNF549,ATF4,ETV1,GABPA,ETV5::FOXI1	RAD21,SPI1,CTCF
chr3-32579283-32579783	chr3	32579283	32579783	51143	DYNC1LI1	32521831	32628009	32570874	-8658	51143	DYNC1LI1	-	Neutrophils	Distal Intergenic		MEIS3,MYC,ZNF549,GABPA,ELK1::HOXB13,ETV2::FOXI1,ETV5::FOXI1,TFAP4::ETV1	SMC3,RAD21
chr3-46478292-46478899	chr3	46478292	46478899	4057	LTF	46424763	46481327	46465163	-13431	4057	LTF	-	Neutrophils	Intron		RARA::RXRA,ZEB1,KLF6,TCF4,TFAP4::ETV1	RAD21,SPI1
chr3-120033157-120034043	chr3	120033157	120034043	2932	GSK3B	119827343	120169266	120093666	60065	2932	GSK3B	-	Neutrophils	Intron	SPIC,ETV7,SPIB	SPIC,ZBTB18,ZNF341,SPIB,ZFP14	SMC3,RAD21,SPI1,CTCF
chr3-128991241-128991776	chr3	128991241	128991776	57501	KIAA1257	128944172	128997872	128991897	388	57501	KIAA1257	-	Neutrophils	5' UTR	SPIC,ETV7,EHF,SPIB	RARA::RXRA,SPIC,ETV3,ZBTB7A,ETS2,THRB,HAND2,ETV1,GABPA,SPIB,ELK1::HOXB13,ETV2::FOXI1,ETV5::FOXI1,FOXO1::FLI1,TFAP4::ETV1	RAD21,SMC3,CTCF,SPI1
chr3-134511410-134511910	chr3	134511410	134511910	80254	CEP63	134491006	134582229	134495294	16365	80254	CEP63	+	Neutrophils	Exon	ETV7,SPIB	TBXT,ETS2,ZNF341,ETV1,SPIB,ETV2::FOXI1	SMC3,RAD21,CTCF,SPI1
chr4-128908635-128909148	chr4	128908635	128909148	132320	SCLT1	128884069	129045301	128936704	27812	132320	SCLT1	-	Neutrophils	Intron		POU3F4,MNT,MYC,PPARA::RXRA,ZNF341,ATF4,ELK1::HOXB13	SMC3,RAD21,SPI1,CTCF
chr5-1513638-1514138	chr5	1513638	1514138	102466103	MIR6075	1502893	1517298	1510856	-3031	102466103	MIR6075	-	Neutrophils	Intron	ETV7,SPIB	MYC,ZNF528,ZNF549,SPIB	RAD21,SPI1,CTCF
chr5-80621644-80622149	chr5	80621644	80622149	103689917	LINC01337	80596507	80638279	80622524	627	103689917	LINC01337	-	Neutrophils	Promoter	SPIC,SPIB	RARA::RXRA,SPIC,ZEB1,ATF2,ZNF341,MYOD1,SPIB,TCF4	SMC3,RAD21,SPI1
chr5-89418515-89419089	chr5	89418515	89419089	4208	MEF2C	88710281	89460494	88904257	-514544	4208	MEF2C	-	Neutrophils	Promoter	SPIC,SPIB	SPIC,RARA::RXRG,MAFA,ETV1,GABPA,SPIB,ETV2::FOXI1,ETV5::FOXI1,FOXO1::FLI1	SMC3,RAD21,CTCF,SPI1
chr5-94602476-94602976	chr5	94602476	94602976	84250	SLF1	94547766	94618459	94618347	-15620	84250	SLF1	+	Neutrophils	Intron	SPIC,ETV7,EHF,SPIB	SPIC,ZNF528,ZNF341,ZNF549,ETV1,GABPA,SPIB,ETV5::DRGX	RAD21,SMC3,CTCF,SPI1
chr5-143124607-143125107	chr5	143124607	143125107	23092	ARHGAP26	142757993	143178706	143121115	3741	23092	ARHGAP26	+	Neutrophils	Intron		HAND2,FOXO1::FLI1	SMC3,CTCF,RAD21
chr6-15219445-15220011	chr6	15219445	15220011	3720	JARID2	14765876	15247465	15246296	-26567	3720	JARID2	+	Neutrophils	Distal Intergenic	ETV7	NR2F1,HIC2,CEBPG,ZBTB7A,NHLH2,ATF2,MYOD1,PHOX2B,TCF4,ELK1::HOXB13,FOXO1::FLI1	SMC3,RAD21,CTCF,SPI1
chr6-30329232-30329732	chr6	30329232	30329732	56658	TRIM39	30327205	30337010	30328889	592	56658	TRIM39	+	Neutrophils	Promoter		RAX2,MEIS3,BSX,KLF6,ATF4,ETV5::FOXI1,ZFP14	RAD21,SMC3,CTCF,SPI1
chr6-31215151-31215651	chr6	31215151	31215651	253018	HCG27	31189246	31235839	31202013	13387	253018	HCG27	+	Neutrophils	Distal Intergenic	EHF	ETS2,ETV1,GABPA,ETV2::FOXI1	SPI1
chr6-89128247-89128747	chr6	89128247	89128747	135295	SRSF12	89093827	89132065	89118081	-10415	135295	SRSF12	-	Neutrophils	Distal Intergenic		ALX3,TBXT,UNCX,HIC2
chr6-109740679-109741179	chr6	109740679	109741179	9896	FIG4	109691265	109882131	109716506	24422	9896	FIG4	+	Neutrophils	Exon	ETV7,SPIB	MYC,SOX13,ETS2,ZNF341,ATF4,ETV1,FOXA2,SPIB,ETV2::FOXI1,FOXO1::FLI1,ZFP14	RAD21,SMC3,SPI1,CTCF
chr6-109872927-109873444	chr6	109872927	109873444	9896	FIG4	109691265	109882131	109786006	87178	9896	FIG4	+	Neutrophils	Intron	EHF,SPIB	RARA::RXRA,FOSL1::JUN,FOSB::JUNB,RARA::RXRG,SPIB,ETV5::DRGX,TFAP4::ETV1	SMC3,RAD21,CTCF,SPI1
chr6-166262664-166263164	chr6	166262664	166263164	285800	PRR18	166238542	166316535	166308383	45468	285800	PRR18	-	Neutrophils	Distal Intergenic	SPIB	RARA::RXRA,NR2F1,CEBPG,ZEB1,ATF2,SPIB,TCF4	SMC3,RAD21,SPI1
chr6-166728751-166729251	chr6	166728751	166729251	6196	RPS6KA2	166509872	166883184	166757911	28909	6196	RPS6KA2	-	Neutrophils	Intron	SPIC,ETV7,EHF,SPIB	SPIC,HIC2,TFAP2C,ZEB1,ZNF549,ETV1,GABPA,MYOD1,SPIB,TCF4	SPI1
chr7-26912275-26912775	chr7	26912275	26912775	8935	SKAP2	26690467	27045606	26865113	-47411	8935	SKAP2	-	Neutrophils	Intron		CUX2	SMC3,CTCF,RAD21,SPI1
chr7-77726428-77726928	chr7	77726428	77726928	222194	RSBN1L	77696355	77783620	77697151	29526	222194	RSBN1L	+	Neutrophils	Intron		KLF6,PHOX2B	SMC3,RAD21
chr7-112421871-112422692	chr7	112421871	112422692	3475	IFRD1	112380349	112474469	112422968	-686	3475	IFRD1	+	Neutrophils	Promoter	SPIC,ETV7,EHF,SPIB	SPIC,TBX4,ZBTB7A,ZEB1,ETS2,ZNF528,NKX2-2,ATF4,ETV1,GABPA,SPIB,TCF4,ETV2::FOXI1,ETV5::FOXI1,FOXO1::FLI1,TFAP4::ETV1	SMC3,CTCF,RAD21,SPI1
chr7-141988585-141989085	chr7	141988585	141989085	8972	MGAM	141984806	142103261	141995838	-7002	8972	MGAM	+	Neutrophils	Intron	EHF	RARA::RXRA,NR2F1,ZEB1,HOXD9,TCF4,ETV2::FOXI1,FOXO1::FLI1,TFAP4::ETV1	SMC3,RAD21
chr7-157490425-157491094	chr7	157490425	157491094	406945	MIR153-2	157478122	157889849	157574422	83662	406945	MIR153-2	-	Neutrophils	Intron	SPIC,ETV7,EHF,SPIB	SPIC,NR2F1,POU3F4,RUNX2,FOSL1::JUN,FOSB::JUNB,ETS2,KLF6,ETV1,GABPA,SPIB,ETV2::FOXI1,ETV5::FOXI1,FOXO1::FLI1	SMC3,RAD21,SPI1,CTCF
chr8-8244381-8244898	chr8	8244381	8244898	157285	PRAG1	8235419	8544218	8381747	137107	157285	PRAG1	-	Neutrophils	Exon	SPIC,ETV7,EHF,SPIB	SPIC,ETV3,TFAP2C,ZBTB7A,ETS2,NHLH2,THRB,ATF3,ATF4,ETV1,GABPA,SPIB,ETV2::FOXI1,ETV5::FOXI1,FOXO1::FLI1	RAD21,CTCF,SMC3,SPI1
chr8-10087876-10088376	chr8	10087876	10088376	4482	MSRA	9978871	10388050	10095551	-7424	4482	MSRA	+	Neutrophils	Intron	SPIC,EHF,SPIB	SPIC,RUNX2,ZBTB7A,ZEB1,ETS2,NHLH2,HOXD9,ZNF8,HAND2,ETV1,GABPA,SPIB,ELK1::HOXB13,ETV2::FOXI1,ETV5::FOXI1,FOXO1::FLI1,TFAP4::ETV1,ZFP14	RAD21,SPI1
chr8-23525105-23525740	chr8	23525105	23525740	51312	SLC25A37	23493251	23624832	23528805	-3382	51312	SLC25A37	+	Neutrophils	Distal Intergenic	SPIC	SPIC,PPARA::RXRA,ZNF528,ZNF549,ELK1::HOXB13,ETV2::FOXI1,ETV5::FOXI1,FOXO1::FLI1	RAD21,SMC3,CTCF,SPI1
chr8-47862518-47863018	chr8	47862518	47863018	5591	PRKDC	47758812	47960184	47864792	2023	5591	PRKDC	-	Neutrophils	Exon		ATF3,ATF2,ZNF341,ZNF549,ATF4,FOXO1::FLI1,POU2F1::SOX2	SMC3,RAD21,CTCF,SPI1
chr8-47869393-47869893	chr8	47869393	47869893	5591	PRKDC	47758812	47960184	47864792	-4850	5591	PRKDC	-	Neutrophils	Intron		TFAP2C,ZNF528,ZNF549,NFIL3	SMC3,RAD21,CTCF,SPI1
chr8-129887942-129888738	chr8	129887942	129888738	51571	FAM49B	129817103	129989721	129871436	-16903	51571	FAM49B	-	Neutrophils	Intron	ETV7,SPIB	ESRRB,NR2F1,RUNX2,ETS2,ZNF549,ETV1,SPIB,ETV2::FOXI1
chr8-141983907-141984407	chr8	141983907	141984407	100616268	MIR4472-1	141841785	142187347	142176339	-192181	100616268	MIR4472-1	+	Neutrophils	Distal Intergenic
chr8-142166838-142167338	chr8	142166838	142167338	100616268	MIR4472-1	141841785	142187347	142176339	-9250	100616268	MIR4472-1	+	Neutrophils	Intron		TBXT,HIC2,ZNF341,TFAP4::ETV1,ZFP14
chr9-92961037-92962733	chr9	92961037	92962733	89846	FGD3	92912745	93044281	92963961	-2075	89846	FGD3	+	Neutrophils	Intron	ETV7,EHF,SPIB	PBX1,ZBTB18,MEIS3,ZBTB7A,ZEB1,FOSL1::JUN,FOSB::JUNB,PPARA::RXRA,KLF6,THRB,ZBTB32,ATF3,ATF2,HAND2,ETV1,GABPA,SPIB,ETV2::DRGX,TFAP4::ETV1,ZFP14
chr9-108325362-108325862	chr9	108325362	108325862	10880	ACTL7B	108173725	108859616	108856967	531354	10880	ACTL7B	-	Neutrophils	Distal Intergenic	SPIC	SPIC,HIC2,RARA::RXRG,HAND2,NKX2-2,ZNF549,NKX2-5,ZFP14
chr10-3554014-3554514	chr10	3554014	3554514	1316	KLF6	3476530	3888220	3780217	225952	1316	KLF6	-	Neutrophils	Intron	EHF,SPIB	ZBTB7A,ETV1,GABPA,SPIB,ELK1::HOXB13,ETV2::FOXI1,ETV5::FOXI1,FOXO1::FLI1	RAD21,SMC3
chr10-35443576-35444076	chr10	35443576	35444076	219771	CCNY	35221713	35567803	35434111	9714	219771	CCNY	+	Neutrophils	Exon	ETV7,EHF,SPIB	BSX,ATF2,SPIB,ETV5::FOXI1	SPI1,RAD21
chr10-48790006-48790530	chr10	48790006	48790530	57705	WDFY4	48670571	48867662	48802738	-12469	57705	WDFY4	+	Neutrophils	Intron		CEBPG,ZEB1,ETS2,NKX2-2,ZNF341,ETV1,ETV2::FOXI1	RAD21,SMC3
chr10-92759315-92759815	chr10	92759315	92759815	3087	HHEX	92641619	92763372	92692032	67532	3087	HHEX	+	Neutrophils	Distal Intergenic		BHLHE40,KLF6,MYOD1
chr10-117397958-117398501	chr10	117397958	117398501	118987	PDZD8	117277665	117435077	117375467	-22761	118987	PDZD8	-	Neutrophils	Distal Intergenic	SPIB	ZBTB18,TFAP2C,ETS2,HAND2,ZNF341,ETV1,SPIB,ETV2::FOXI1	CTCF,SMC3,SPI1
chr11-15636587-15637087	chr11	15636587	15637087	102464826	MIR6073	15602384	15992474	15969621	332783	102464826	MIR6073	-	Neutrophils	Intron		NHLH2,ATF4,POU2F1::SOX2	SMC3,CTCF,RAD21,SPI1
chr11-62018931-62019434	chr11	62018931	62019434	2495	FTH1	61961162	62045816	61967660	-51521	2495	FTH1	-	Neutrophils	Distal Intergenic	SPIB	RARA::RXRA,ESRRB,NR2F1,RARA::RXRG,ATF2,SPIB	SMC3,RAD21,CTCF,SPI1
chr12-49004602-49005136	chr12	49004602	49005136	5571	PRKAG1	49001452	49021910	49005829	959	5571	PRKAG1	-	Neutrophils	3' UTR	SPIC,SPIB	SPIC,ZEB1,MAFA,SPIB,ETV2::DRGX,ETV5::DRGX	SMC3,RAD21,CTCF,SPI1
chr12-120694796-120695296	chr12	120694796	120695296	9761	MLEC	120672923	120702301	120694167	878	9761	MLEC	+	Neutrophils	Exon	SPIC	SPIC,HIC2,NKX2-2,NKX2-5	SMC3,RAD21,SPI1
chr12-121018122-121018622	chr12	121018122	121018622	64897	C12orf43	121001810	121027724	121016502	-1869	64897	C12orf43	-	Neutrophils	3' UTR	SPIC,EHF	RARA::RXRA,SPIC,ZEB1,RARA::RXRG,ETS2,ETV1,GABPA,NFIL3,ETV2::DRGX,ETV2::FOXI1,ETV5::DRGX,ETV5::FOXI1,FOXO1::FLI1,ZFP14	RAD21,SMC3,CTCF
chr12-131873556-131874056	chr12	131873556	131874056	8408	ULK1	131872244	131924633	131894651	-20844	8408	ULK1	+	Neutrophils	Distal Intergenic	SPIC,EHF,SPIB	SPIC,POU3F4,MGA,ETV1,GABPA,SPIB,ELK1::HOXB13,ETV2::DRGX,ETV2::FOXI1,ETV5::DRGX,FOXO1::FLI1
chr13-45950542-45951089	chr13	45950542	45951089	23091	ZC3H13	45931646	46078892	46011555	60739	23091	ZC3H13	-	Neutrophils	Distal Intergenic	SPIB	HIC2,MGA,TBX4,SOX13,ATF3,ATF2,HAND2,SPIB,TFAP4::ETV1,TBX3	CTCF,RAD21,SPI1,SMC3
chr13-53017447-53017947	chr13	53017447	53017947	10562	OLFM4	52938701	53090283	53028759	-11061	10562	OLFM4	+	Neutrophils	Distal Intergenic	SPIB	ETV3,ZBTB7A,ZEB1,ZNF528,HAND2,SPIB,ZFP14	SMC3,SPI1,RAD21,CTCF
chr13-114051750-114052250	chr13	114051750	114052250	22821	RASA3	113982519	114183749	114036193	-15806	22821	RASA3	-	Neutrophils	Exon	SPIC,SPIB	SPIC,POU3F4,TFAP2C,MAFA,ZNF341,MYOD1,SPIB	SMC3,RAD21
chr14-64728106-64728623	chr14	64728106	64728623	26030	PLEKHG3	64645464	64747788	64727884	479	26030	PLEKHG3	+	Neutrophils	Intron	EHF,SPIB	NR2F1,MEIS3,TFAP2C,ZNF549,SPIB,ZFP14	SMC3,RAD21,CTCF,SPI1
chr14-90272404-90272916	chr14	90272404	90272916	5700	PSMC1	90159131	90273379	90267476	5183	5700	PSMC1	+	Neutrophils	3' UTR	SPIC,ETV7,EHF,SPIB	SPIC,ETV3,MGA,ZBTB7A,ETS2,ZNF528,ZNF549,ETV1,GABPA,SPIB,ETV2::FOXI1,ETV5::DRGX,ETV5::FOXI1,FOXO1::FLI1,POU2F1::SOX2	SMC3,SPI1,CTCF,RAD21
chr14-92392678-92393178	chr14	92392678	92393178	123041	SLC24A4	92222260	92483270	92408379	-15450	123041	SLC24A4	+	Neutrophils	Intron	ETV7,EHF,SPIB	RARA::RXRA,NR2F1,MYC,RARA::RXRG,ATF2,MYOD1,SPIB	SPI1
chr14-97571807-97572307	chr14	97571807	97572307	101929241	LINC02325	97201228	97572748	97458870	113186	101929241	LINC02325	+	Neutrophils	Intron	SPIC,ETV7,EHF,SPIB	SPIC,ESRRB,SPIB,ETV2::FOXI1,ETV5::DRGX,ETV5::FOXI1	RAD21,CTCF,SMC3,SPI1
chr14-97638838-97639338	chr14	97638838	97639338	100129345	LINC02291	97572749	97832352	97686627	47538	100129345	LINC02291	-	Neutrophils	Intron		SOX13,ETV2::FOXI1	RAD21,SMC3
chr14-97706727-97707237	chr14	97706727	97707237	100129345	LINC02291	97572749	97832352	97686658	-20323	100129345	LINC02291	-	Neutrophils	Distal Intergenic	SPIC	SPIC,MYC,ZNF549,ZFP14	RAD21,SPI1
chr15-34161520-34162020	chr15	34161520	34162020	79768	KATNBL1	34123965	34217547	34154831	-6938	79768	KATNBL1	-	Neutrophils	Intron	SPIC,EHF,SPIB	SPIC,POU3F4,ZEB1,NKX2-2,NFIL3,SPIB,POU2F1::SOX2	SMC3,RAD21
chr15-43270596-43271135	chr15	43270596	43271135	9333	TGM5	43230514	43271932	43266857	-4007	9333	TGM5	-	Neutrophils	Distal Intergenic	SPIC,EHF	SPIC,ZBTB18,TFAP2C,SOX13,ZEB1,NHLH2,ETV1,GABPA,ETV2::FOXI1,FOXO1::FLI1,ZFP14	SMC3,RAD21,SPI1,CTCF
chr15-58506714-58507214	chr15	58506714	58507214	8854	ALDH1A2	58452953	58507830	58473913	-33050	8854	ALDH1A2	-	Neutrophils	Intron		HIC2,KLF6,ZNF528,ETV5::DRGX,TFAP4::ETV1	RAD21,SMC3,CTCF
chr15-69957751-69958356	chr15	69957751	69958356	7090	TLE3	69943373	70077031	70051505	93451	7090	TLE3	-	Neutrophils	Distal Intergenic		ZBTB18,TFAP2C,ZEB1,ATF3,ATF2	RAD21,CTCF,SPI1
chr15-90009559-90010179	chr15	90009559	90010179	100422841	MIR3174	90004621	90037384	90006755	3113	100422841	MIR3174	+	Neutrophils	Intron	SPIC,ETV7,EHF,SPIB	SPIC,HIC2,RUNX2,MGA,TBX4,ZBTB7A,ETV1,GABPA,SPIB,ELK1::HOXB13,ETV2::FOXI1,ZFP14	RAD21,SMC3,SPI1,CTCF
chr15-100553468-100553968	chr15	100553468	100553968	441733	PRKXP1	100547575	100561276	100551922	-1795	441733	PRKXP1	-	Neutrophils	Exon		ZBTB18,NHLH2,ZNF341,ETV5::FOXI1,ZFP14	RAD21,SPI1
chr15-101150156-101150698	chr15	101150156	101150698	22856	CHSY1	101126144	101264609	101187870	37442	22856	CHSY1	-	Neutrophils	Distal Intergenic	SPIC,ETV7,EHF,SPIB	SPIC,MNT,MYC,ZEB1,SPIB,TCF4	SMC3,RAD21,CTCF,SPI1
chr16-12529584-12530084	chr16	12529584	12530084	92017	SNX29	11971044	12538287	12356253	173580	92017	SNX29	+	Neutrophils	Intron	SPIC,ETV7,EHF,SPIB	SPIC,NR2F1,ZBTB7A,ETS2,KLF6,ETV1,GABPA,SPIB,ELK1::HOXB13,ETV2::FOXI1,ETV5::FOXI1,FOXO1::FLI1	RAD21,SMC3,CTCF,SPI1
chr16-30096768-30097268	chr16	30096768	30097268	83719	YPEL3	30093384	30102673	30096915	-102	83719	YPEL3	-	Neutrophils	Promoter	EHF,SPIB	ETV1,FOXA2,GABPA,SPIB,ETV2::FOXI1,FOXO1::FLI1	RAD21,CTCF,SPI1
chr16-49489431-49489931	chr16	49489431	49489931	123970	C16orf78	49327828	49507337	49373823	115857	123970	C16orf78	+	Neutrophils	3' UTR	ETV7,SPIB	LBX1,ZNF528,ZNF341,SPIB
chr16-69190679-69191179	chr16	69190679	69191179	6645	SNTB2	69177117	69243662	69187642	3286	6645	SNTB2	+	Neutrophils	Exon	SPIC,EHF	SPIC,MGA,TBX4,MNT,HOXB9,ETV1,GABPA,ETV2::FOXI1,ETV5::FOXI1,FOXO1::FLI1
chr16-81866821-81867487	chr16	81866821	81867487	5336	PLCG2	81721478	81975046	81857945	9208	5336	PLCG2	+	Neutrophils	Intron	SPIB	HIC2,NHLH2,ZNF341,ZNF549,SPIB,TFAP4::ETV1	SMC3,SPI1,RAD21,CTCF
chr16-83993892-83994441	chr16	83993892	83994441	54550	NECAB2	83962811	84007504	83993403	762	54550	NECAB2	+	Neutrophils	Exon	ETV7,EHF,SPIB	RUNX2,MNT,CEBPG,MYC,FOSL1::JUN,FOSB::JUNB,HAND2,ATF4,SPIB,ELK1::HOXB13	CTCF,RAD21,SPI1,SMC3
chr17-611182-611683	chr17	611182	611683	55275	VPS53	484468	727064	628231	16798	55275	VPS53	-	Neutrophils	Intron		LBX1,RUNX2,KLF6,NKX2-2	SMC3,RAD21,CTCF,SPI1
chr17-4717778-4718278	chr17	4717778	4718278	409	ARRB2	4707414	4724432	4717436	591	409	ARRB2	+	Neutrophils	5' UTR	SPIC,ETV7,EHF,SPIB	RARA::RXRA,SPIC,KLF6,SPIB	RAD21,SMC3,CTCF,SPI1
chr17-8393556-8394097	chr17	8393556	8394097	643904	RNF222	8390520	8405478	8397826	3999	643904	RNF222	-	Neutrophils	Intron	ETV7,EHF,SPIB	ZBTB7A,ZEB1,NHLH2,THRB,ATF2,ETV1,GABPA,SPIB,TCF4,FOXO1::FLI1,TFAP4::ETV1,ZFP14	RAD21,SMC3,CTCF,SPI1
chr17-10107218-10107736	chr17	10107218	10107736	8522	GAS7	9915204	10281547	10114553	7075	8522	GAS7	-	Neutrophils	Intron	ETV7,EHF,SPIB	ETV1,GABPA,NFIL3,SPIB	RAD21,SPI1,CTCF
chr17-11999662-12000162	chr17	11999662	12000162	7566	ZNF18	11937674	12009167	11997510	-2401	7566	ZNF18	-	Neutrophils	Intron		UNCX,HIC2,ETV3,ZBTB7A,ETS2,ATF4,ETV1,GABPA,ELK1::HOXB13	RAD21,SMC3,CTCF,SPI1
chr17-31715386-31715898	chr17	31715386	31715898	100126356	MIR365B	31575341	31717171	31575411	140230	100126356	MIR365B	+	Neutrophils	Distal Intergenic	ETV7,EHF,SPIB	ZBTB7A,ZEB1,ETV1,GABPA,SPIB,TCF4,ELK1::HOXB13,ETV5::DRGX,FOXO1::FLI1,TFAP4::ETV1	RAD21,SMC3,CTCF,SPI1
chr17-49235251-49235759	chr17	49235251	49235759	162466	PHOSPHO1	49223310	49239502	49230766	-4738	162466	PHOSPHO1	-	Neutrophils	Intron	EHF,SPIB	NR2F1,MTF1,ZBTB7A,ETV1,GABPA,SPIB	SMC3,RAD21,CTCF,SPI1
chr17-51088804-51089304	chr17	51088804	51089304	9043	SPAG9	50921670	51137200	51079622	-9431	9043	SPAG9	-	Neutrophils	Intron		NR2F1,HIC2,ZEB1,TCF4	SMC3,RAD21,CTCF
chr17-56313176-56313680	chr17	56313176	56313680	162282	ANKFN1	55942348	56525323	56323223	-9794	162282	ANKFN1	+	Neutrophils	Intron	EHF,SPIB	ZBTB18,HAND2,ZNF549,ETV1,GABPA,SPIB,ETV5::FOXI1,ZFP14	SMC3,SPI1,RAD21,CTCF
chr17-60161958-60162485	chr17	60161958	60162485	762	CA4	60120911	60169890	60158108	4112	762	CA4	+	Neutrophils	Intron	SPIC,EHF	SPIC,ZBTB7A,ETS2,ZNF549,ETV1,GABPA,NKX2-5,TCF4,ETV2::FOXI1,ETV5::FOXI1,FOXO1::FLI1	CTCF,SMC3,RAD21,SPI1
chr17-74391675-74392175	chr17	74391675	74392175	350383	GPR142	74364677	74396154	74367458	24466	350383	GPR142	+	Neutrophils	Distal Intergenic	EHF,SPIB	RUNX2,MTF1,ZNF341,GABPA,SPIB,ETV5::FOXI1,FOXO1::FLI1	SPI1,SMC3
chr17-81146100-81146600	chr17	81146100	81146600	100302229	MIR1250	81133078	81149662	81133308	-13041	100302229	MIR1250	-	Neutrophils	Intron	SPIC,SPIB	SPIC,NR2F1,RUNX2,MGA,TBX4,ZEB1,KLF6,NHLH2,MYOD1,SPIB,TCF4,ZFP14,TBX3	SMC3,RAD21,CTCF,SPI1
chr17-81160190-81160728	chr17	81160190	81160728	9625	AATK	81149663	81179226	81166017	5557	9625	AATK	-	Neutrophils	Intron	SPIB	NR2F1,ZEB1,RARA::RXRG,MYOD1,SPIB,TCF4	SMC3,RAD21,CTCF,SPI1
chr18-2646542-2647059	chr18	2646542	2647059	23347	SMCHD1	2633260	2821564	2655738	-8937	23347	SMCHD1	+	Neutrophils	Distal Intergenic	ETV7	MGA,TBX4,ZBTB7A,ZEB1,KLF6,TCF4,ELK1::HOXB13,TBX3	SMC3,RAD21,SPI1,CTCF
chr18-62453693-62454284	chr18	62453693	62454284	54877	ZCCHC2	62440456	62648627	62523007	-69018	54877	ZCCHC2	+	Neutrophils	Distal Intergenic	ETV7,SPIB	NR2F1,HIC2,ZEB1,ATF4,MYOD1,SPIB,TCF4	RAD21,SPI1
chr19-14674577-14675240	chr19	14674577	14675240	84658	ADGRE3	14628984	14682399	14674918	9	84658	ADGRE3	-	Neutrophils	Promoter	ETV7,EHF,SPIB	FOSL1::JUN,FOSB::JUNB,PPARA::RXRA,ZNF528,ATF4,SPIB	RAD21,SMC3,CTCF,SPI1
chr19-15641871-15642371	chr19	15641871	15642371	4051	CYP4F3	15634624	15661368	15641309	811	4051	CYP4F3	+	Neutrophils	Promoter	SPIC,ETV7,EHF,SPIB	RARA::RXRA,SPIC,ETV3,MTF1,ZEB1,RARA::RXRG,KLF6,SPIB,ETV2::FOXI1,ZFP14	SMC3,RAD21,CTCF,SPI1
chr19-16802285-16802813	chr19	16802285	16802813	23309	SIN3B	16780300	16883011	16829400	-26850	23309	SIN3B	+	Neutrophils	Intron	SPIC,SPIB	RARA::RXRA,SPIC,NR2F1,HIC2,MGA,TBX4,ETS2,ZBTB32,ETV1,SPIB,ETV2::FOXI1,POU2F1::SOX2,TBX3	SMC3,RAD21,SPI1,CTCF
chr19-35011176-35011693	chr19	35011176	35011693	57655	GRAMD1A	34979417	35026991	35011484	-49	57655	GRAMD1A	+	Neutrophils	Promoter	EHF,SPIB	MGA,TBX4,ETV1,GABPA,MYOD1,SPIB,TFAP4::ETV1,TBX3	SMC3,RAD21,CTCF,SPI1
chr19-42594703-42595203	chr19	42594703	42595203	1088	CEACAM8	42578083	42667213	42594930	-22	1088	CEACAM8	-	Neutrophils	Promoter		ZBTB7A,KLF6,ETV1,ZFP14
chr19-46023138-46023684	chr19	46023138	46023684	8993	PGLYRP1	46020999	46032040	46023065	-345	8993	PGLYRP1	-	Neutrophils	Promoter	ETV7,EHF	MEIS3,TFAP2C,KLF6,GABPA,ETV5::FOXI1,FOXO1::FLI1,ZFP14	SMC3,CTCF,SPI1
chr19-47336595-47337245	chr19	47336595	47337245	27202	C5AR2	47321011	47343197	47337114	-193	27202	C5AR2	+	Neutrophils	Promoter	EHF,SPIB	MGA,TBX4,TFAP2C,MNT,MYC,ETV1,GABPA,SPIB,TCF4,ETV2::FOXI1,ETV5::FOXI1,FOXO1::FLI1,TBX3	SMC3,CTCF,RAD21,SPI1
chr19-51764277-51764870	chr19	51764277	51764870	2358	FPR2	51751968	51781770	51762760	1812	2358	FPR2	+	Neutrophils	Intron	ETV7,SPIB	ESRRB,ETV3,MEIS3,CEBPG,ZBTB7A,ETS2,HOXB9,MAFA,HAND2,ATF4,MYOD1,SPIB	CTCF,RAD21,SMC3,SPI1
chr20-5973931-5974431	chr20	5973931	5974431	84515	MCM8	5950606	5978376	5950931	23249	84515	MCM8	+	Neutrophils	Intron	SPIC,SPIB	SPIC,MGA,TBX4,ZEB1,HOXB9,SPIB,TCF4,TBX3	SMC3,RAD21,SPI1
chr20-45156747-45157247	chr20	45156747	45157247	5266	PI3	45149671	45190936	45174876	-17878	5266	PI3	+	Neutrophils	Distal Intergenic	SPIC,ETV7,SPIB	SPIC,FOXA2,SPIB	CTCF,RAD21,SPI1
chr20-46011686-46012289	chr20	46011686	46012289	4318	MMP9	45990541	46015299	46008908	3078	4318	MMP9	+	Neutrophils	Exon		MEIS3	SPI1,RAD21,SMC3,CTCF
chr20-53875447-53875954	chr20	53875447	53875954	8537	BCAS1	53794885	54048592	53995929	120228	8537	BCAS1	-	Neutrophils	Promoter	ETV7,SPIB	ETV3,ZBTB7A,ZEB1,RARA::RXRG,ETS2,MAFA,ATF4,SPIB,ELK1::HOXB13	SMC3,RAD21,CTCF,SPI1
chr20-56487140-56487640	chr20	56487140	56487640	140687	GCNT7	56483148	56505499	56497608	10217	140687	GCNT7	-	Neutrophils	Intron	SPIB	PBX1,MEIS3,ZBTB32,HAND2,ZNF341,SPIB,TFAP4::ETV1	SMC3,RAD21,CTCF,SPI1
chr20-60230365-60230865	chr20	60230365	60230865	284757	MIR646HG	60088493	60244681	60180888	49726	284757	MIR646HG	+	Neutrophils	Intron	EHF,SPIB	NKX2-2,NKX2-5,SPIB,ETV5::FOXI1	RAD21,CTCF,SPI1
chr21-35020378-35020902	chr21	35020378	35020902	861	RUNX1	34787904	35385029	35049270	28629	861	RUNX1	-	Neutrophils	Intron	EHF,SPIB	ZNF8,SPIB,ETV5::DRGX	RAD21,SMC3,CTCF,SPI1
chr21-42387101-42387601	chr21	42387101	42387601	64699	TMPRSS3	42374674	42400146	42389118	1766	64699	TMPRSS3	-	Neutrophils	Intron	SPIB	HIC2,FOSL1::JUN,NHLH2,MYOD1,SPIB	SPI1
chr22-23153390-23153916	chr22	23153390	23153916	9609	RAB36	23145174	23164908	23150113	3539	9609	RAB36	+	Neutrophils	Intron	SPIB	ZBTB18,HIC2,ZEB1,KLF6,NHLH2,SPIB,TCF4,ZFP14	CTCF,RAD21,SMC3,SPI1
chr22-33078879-33079379	chr22	33078879	33079379	8224	SYN3	32835380	33083450	33058372	-20756	8224	SYN3	-	Neutrophils	Distal Intergenic		RARA::RXRA,MGA,TBX4,BHLHE40,RARA::RXRG,TBX3
chr22-36936627-36937127	chr22	36936627	36937127	1439	CSF2RB	36892883	36943930	36922612	14264	1439	CSF2RB	+	Neutrophils	Exon	SPIC,ETV7,EHF,SPIB	SPIC,ESRRB,NR2F1,HIC2,ETV3,ZBTB7A,RARA::RXRG,ETS2,ETV1,GABPA,SPIB,ELK1::HOXB13,ETV2::FOXI1,ETV5::FOXI1,TFAP4::ETV1	SMC3,RAD21,CTCF,SPI1
chr22-36954775-36955275	chr22	36954775	36955275	100506241	LL22NC01-81G9.3	36943931	36983752	36965248	-10222	100506241	LL22NC01-81G9.3	+	Neutrophils	Distal Intergenic	ETV7,SPIB	MGA,TBX4,ZBTB7A,SPIB,TBX3	SMC3,RAD21,SPI1,CTCF
chr22-47126207-47126707	chr22	47126207	47126707	642757	TBC1D22A-AS1	46844918	47201498	46915908	-210548	642757	TBC1D22A-AS1	-	Neutrophils	Intron		ZEB1,TFAP4::ETV1
chr22-48276143-48276643	chr22	48276143	48276643	100422916	MIR3201	47952967	48381912	48274364	2028	100422916	MIR3201	+	Neutrophils	Distal Intergenic		FOXA2
chr22-48523573-48524073	chr22	48523573	48524073	25817	FAM19A5	48381913	48736771	48489592	34230	25817	FAM19A5	+	Neutrophils	Intron		TFAP2C,MYC,ZEB1,KLF6,ZNF549,TFAP4::ETV1
chr22-48550161-48550661	chr22	48550161	48550661	25817	FAM19A5	48381913	48736771	48576306	-25894	25817	FAM19A5	+	Neutrophils	Intron		ZBTB18,HIC2,ZEB1,NHLH2,HAND2,NKX2-2,NKX2-5,TCF4,TFAP4::ETV1,ZFP14

## Sheet: Legend
column	description
peak_id	peak id, i.e., chr-start-end
chr	chromosome
peak_start	start position of the peak
peak_end	end position of the peak
gene_id	ENTREZ gene ID
gene_symbol	HUGO Symbols gene ID
gene_locus_start	start of the gene locus
gene_locus_end	end of the gene locus
nearest_tss	position of the nearest TSS
dist_to_tss	distance to the nearest TSS
nearest_tss_gene_id	Gene ID (ENTREZ ID) associated to the nearest TSS
nearest_tss_symbol	Gene ID (HUGO symbol) associated to the nearest TSS
nearest_tss_gene_strand	Gene strand associated to the nearest TSS
cell_type	cell type for which the marker peak is specific
chipSeeker_annot	ChiPSeeker annotation (indicates whether the peak is located in the promoter region, exon, intron, etc.)
Signac_TF_enriched	Transcription factors potentially binding in the peak region (according to the FindMotifs function from Signac) and whose motif was identified as enriched by Signac
MonaLisa_TF_enriched	Transcription factors potentially binding in the peak region (according to the FindMotifs function from Signac) and whose motif was identified as enriched by MonaLisa
Remap_CBP_enriched	Transcription factors potentially binding in the peak region (according to the FindMotifs function from Signac) and whose motif was identified as enriched by ReMapEnrich
